# Supplementary material for: Accessible Region Conformation Capture (ARC-C) gives high-resolution insights into genome architecture and regulation
Source: Genome Res. 2022 Feb;32(2):357–66. doi: 10.1101/gr.275669.121 (PMC8805715; doi:10.1101/gr.275669.121)
Supplement: Supplemental Material [file supp_gr.275669.121_Supplemental_TableS1.xlsx]

## Sheet: Title
Table S1 met-2 set-25 gene expression analyses

## Sheet: up
GeneID	log2(FC)	P-adj	Domain	H3K9me2_marked	H3K9me3_marked
WBGene00008862	6.61787	7.05723e-73	H3K27me3	FALSE	TRUE
WBGene00005832	5.53885	4.47315e-39	H3K27me3	TRUE	TRUE
WBGene00019858	4.37339	6.09514e-29	H3K27me3	FALSE	FALSE
WBGene00012715	3.79923	6.95034e-28	active	TRUE	FALSE
WBGene00009572	4.0855	1.35273e-27	H3K27me3	TRUE	TRUE
WBGene00008387	3.96026	3.03183e-27	active	FALSE	FALSE
WBGene00009224	3.70378	4.31614e-24	active	FALSE	TRUE
WBGene00044213	3.53172	4.90001e-20	H3K27me3	TRUE	TRUE
WBGene00008385	3.37012	6.56323e-20	active	FALSE	FALSE
WBGene00022308	4.99145	1.42146e-18	active	TRUE	TRUE
WBGene00001862	3.42937	1.88093e-18	active	FALSE	FALSE
WBGene00011464	2.86393	1.84842e-16	H3K27me3	FALSE	FALSE
WBGene00013659	4.43858	2.13875e-16	H3K27me3	FALSE	FALSE
WBGene00001433	2.74291	4.56836e-16	active	TRUE	TRUE
WBGene00013729	3.55922	1.77608e-15	active	FALSE	FALSE
WBGene00045468	3.87516	1.10271e-14	H3K27me3	TRUE	TRUE
WBGene00021676	3.42337	1.5056e-14	active	TRUE	FALSE
WBGene00021671	3.05411	3.80007e-14	H3K27me3	TRUE	TRUE
WBGene00012111	2.81388	6.18517e-14	active	FALSE	FALSE
WBGene00002063	2.90743	1.18347e-13	active	TRUE	TRUE
WBGene00013247	2.79586	4.21559e-13	active	TRUE	TRUE
WBGene00009509	3.49399	8.15953e-13	active	TRUE	TRUE
WBGene00012716	3.22373	1.02757e-12	active	TRUE	FALSE
WBGene00008003	3.09295	1.17087e-12	active	TRUE	TRUE
WBGene00009696	2.80466	1.51276e-12	H3K27me3	FALSE	FALSE
WBGene00013611	3.13171	2.06776e-12	H3K27me3	FALSE	TRUE
WBGene00015225	3.50909	2.06776e-12	H3K27me3	FALSE	FALSE
WBGene00018310	3.33296	2.65517e-12	na	TRUE	TRUE
WBGene00044493	2.46884	2.65517e-12	active	FALSE	FALSE
WBGene00012020	2.74879	6.79958e-12	H3K27me3	FALSE	TRUE
WBGene00013198	2.92185	6.79958e-12	H3K27me3	TRUE	FALSE
WBGene00015988	3.46937	6.79958e-12	H3K27me3	FALSE	FALSE
WBGene00021662	3.13453	7.2635e-12	active	FALSE	TRUE
WBGene00006375	2.84554	7.93531e-12	active	FALSE	FALSE
WBGene00018353	3.20842	1.00934e-11	H3K27me3	FALSE	TRUE
WBGene00008681	3.03131	1.13236e-11	active	FALSE	FALSE
WBGene00015227	3.13572	1.45988e-11	H3K27me3	FALSE	FALSE
WBGene00013610	2.75977	1.8045e-11	H3K27me3	FALSE	TRUE
WBGene00008863	3.60641	2.02352e-11	H3K27me3	FALSE	FALSE
WBGene00021015	2.83363	3.64081e-11	active	TRUE	TRUE
WBGene00015095	2.57542	3.7341e-11	active	FALSE	FALSE
WBGene00022215	3.45469	1.23738e-10	na	TRUE	TRUE
WBGene00008267	3.5177	1.24849e-10	H3K27me3	FALSE	FALSE
WBGene00010066	3.83593	1.42459e-10	na	FALSE	FALSE
WBGene00012112	2.50695	2.00883e-10	active	FALSE	FALSE
WBGene00008010	3.49561	2.54756e-10	H3K27me3	TRUE	TRUE
WBGene00013728	2.71967	4.78416e-10	active	TRUE	FALSE
WBGene00010362	2.52606	5.35636e-10	active	TRUE	TRUE
WBGene00004810	2.22912	6.4895e-10	active	FALSE	TRUE
WBGene00001399	2.36195	1.21714e-09	H3K27me3	FALSE	FALSE
WBGene00010263	3.25399	2.03624e-09	ß	TRUE	FALSE
WBGene00012110	2.41084	3.04786e-09	active	FALSE	FALSE
WBGene00010036	2.66964	3.11843e-09	active	FALSE	FALSE
WBGene00019021	2.55857	3.71202e-09	H3K27me3	FALSE	FALSE
WBGene00021081	3.42206	7.96724e-09	H3K27me3	FALSE	FALSE
WBGene00008568	2.56706	1.11657e-08	active	TRUE	TRUE
WBGene00021884	2.57902	1.43102e-08	active	TRUE	FALSE
WBGene00007624	2.5354	2.31923e-08	active	FALSE	FALSE
WBGene00013246	2.39089	2.34541e-08	active	TRUE	FALSE
WBGene00022349	3.23583	2.41433e-08	active	FALSE	FALSE
WBGene00001607	2.19839	2.51133e-08	active	FALSE	FALSE
WBGene00000781	2.03545	3.89365e-08	H3K27me3	FALSE	FALSE
WBGene00016639	2.93349	4.97669e-08	H3K27me3	FALSE	TRUE
WBGene00012618	3.23202	5.13567e-08	H3K27me3	TRUE	TRUE
WBGene00018537	3.34179	6.28157e-08	na	TRUE	TRUE
WBGene00012933	2.13587	8.28567e-08	active	TRUE	FALSE
WBGene00017796	2.05141	1.02061e-07	active	TRUE	TRUE
WBGene00007766	2.41192	1.22685e-07	H3K27me3	TRUE	TRUE
WBGene00004509	2.06396	1.26459e-07	H3K27me3	FALSE	TRUE
WBGene00012276	1.92835	1.82355e-07	active	FALSE	FALSE
WBGene00013727	2.64032	2.3529e-07	active	TRUE	FALSE
WBGene00004178	2.50955	2.54849e-07	active	FALSE	FALSE
WBGene00206493	3.35212	2.54849e-07	H3K27me3	TRUE	TRUE
WBGene00016486	3.16314	4.33979e-07	na	FALSE	TRUE
WBGene00017873	3.14315	4.66193e-07	na	FALSE	TRUE
WBGene00044256	3.15074	4.81279e-07	H3K27me3	TRUE	TRUE
WBGene00007615	2.00346	4.92718e-07	active	FALSE	FALSE
WBGene00016984	2.08761	5.01689e-07	na	FALSE	FALSE
WBGene00017678	2.3711	8.12446e-07	H3K27me3	FALSE	FALSE
WBGene00017482	2.61941	8.46602e-07	active	TRUE	TRUE
WBGene00022645	1.84982	8.46602e-07	H3K27me3	FALSE	TRUE
WBGene00017452	2.30241	8.91645e-07	H3K27me3	FALSE	TRUE
WBGene00016512	3.10706	9.06834e-07	H3K27me3	TRUE	TRUE
WBGene00019189	3.18735	9.06834e-07	na	TRUE	TRUE
WBGene00021198	3.06289	9.06834e-07	active	TRUE	FALSE
WBGene00021287	2.84404	9.06834e-07	active	TRUE	TRUE
WBGene00017674	2.35152	1.11809e-06	active	FALSE	FALSE
WBGene00022544	3.02276	1.1638e-06	H3K27me3	TRUE	TRUE
WBGene00013019	2.1228	2.00827e-06	active	TRUE	FALSE
WBGene00017214	3.20778	2.05729e-06	H3K27me3	FALSE	TRUE
WBGene00021913	2.48824	3.32784e-06	active	TRUE	TRUE
WBGene00012845	1.95193	3.50749e-06	active	FALSE	FALSE
WBGene00022550	2.85072	3.9272e-06	H3K27me3	FALSE	FALSE
WBGene00044137	2.73474	3.96445e-06	na	FALSE	FALSE
WBGene00021249	2.13408	3.98464e-06	active	TRUE	TRUE
WBGene00013215	2.37134	4.44847e-06	active	TRUE	TRUE
WBGene00015223	2.38539	4.7178e-06	H3K27me3	FALSE	FALSE
WBGene00006394	2.06969	4.92099e-06	active	FALSE	FALSE
WBGene00005574	3.01016	4.9762e-06	H3K27me3	TRUE	TRUE
WBGene00008390	1.83061	5.85176e-06	H3K27me3	FALSE	FALSE
WBGene00021013	3.01898	8.18821e-06	H3K27me3	FALSE	TRUE
WBGene00001105	2.83272	8.39773e-06	active	TRUE	TRUE
WBGene00019316	2.77759	8.39773e-06	H3K27me3	TRUE	TRUE
WBGene00013126	3.02473	9.28647e-06	H3K27me3	TRUE	TRUE
WBGene00001671	2.17124	9.45606e-06	H3K27me3	TRUE	FALSE
WBGene00012109	1.96178	9.71984e-06	active	FALSE	FALSE
WBGene00003230	2.17882	1.1311e-05	H3K27me3	FALSE	FALSE
WBGene00045511	2.94124	1.1311e-05	H3K27me3	TRUE	TRUE
WBGene00008577	2.31633	1.22712e-05	active	FALSE	FALSE
WBGene00044347	2.74852	1.34085e-05	active	TRUE	TRUE
WBGene00022219	1.91592	1.34618e-05	na	TRUE	TRUE
WBGene00002032	2.1864	1.43278e-05	active	FALSE	FALSE
WBGene00021560	2.0895	1.83076e-05	active	TRUE	FALSE
WBGene00010351	2.21277	1.9877e-05	active	FALSE	FALSE
WBGene00020004	2.16777	2.47949e-05	active	TRUE	FALSE
WBGene00021358	2.88665	2.64062e-05	active	TRUE	FALSE
WBGene00020357	2.53576	2.89141e-05	H3K27me3	FALSE	TRUE
WBGene00022377	2.21508	3.30489e-05	active	TRUE	TRUE
WBGene00021055	1.89205	3.53247e-05	active	TRUE	TRUE
WBGene00018923	1.67052	3.9353e-05	active	TRUE	TRUE
WBGene00013107	2.78549	4.14431e-05	H3K27me3	TRUE	TRUE
WBGene00086568	2.40112	4.46037e-05	H3K27me3	FALSE	FALSE
WBGene00016993	2.00314	4.98558e-05	active	FALSE	TRUE
WBGene00017962	1.65377	6.0565e-05	H3K27me3	FALSE	TRUE
WBGene00022454	2.67649	6.0638e-05	active	TRUE	FALSE
WBGene00007632	2.79587	6.28893e-05	active	FALSE	FALSE
WBGene00021898	2.29504	6.54736e-05	active	FALSE	TRUE
WBGene00013306	2.00994	6.77745e-05	active	TRUE	FALSE
WBGene00011804	1.96653	6.89628e-05	H3K27me3	TRUE	TRUE
WBGene00001606	1.91646	7.41629e-05	active	FALSE	FALSE
WBGene00195165	2.79592	7.59021e-05	H3K27me3	FALSE	TRUE
WBGene00016953	2.82444	8.39446e-05	H3K27me3	TRUE	TRUE
WBGene00015456	1.87736	8.72237e-05	H3K27me3	TRUE	TRUE
WBGene00003093	1.72298	8.90253e-05	H3K27me3	FALSE	FALSE
WBGene00022653	2.46921	9.59162e-05	H3K27me3	FALSE	FALSE
WBGene00021056	1.98092	9.76956e-05	active	FALSE	FALSE
WBGene00045401	2.2215	0.000107828	H3K27me3	FALSE	FALSE
WBGene00002368	1.98584	0.000139061	active	FALSE	FALSE
WBGene00019769	1.85608	0.000139061	active	FALSE	FALSE
WBGene00044188	1.66619	0.000149272	active	FALSE	FALSE
WBGene00044183	2.71431	0.000161684	H3K27me3	FALSE	TRUE
WBGene00013250	1.90035	0.000166663	active	FALSE	FALSE
WBGene00013359	1.5479	0.000174309	active	TRUE	TRUE
WBGene00012552	2.03785	0.000190881	active	TRUE	TRUE
WBGene00021863	1.6837	0.000193986	H3K27me3	TRUE	FALSE
WBGene00012123	1.97623	0.000194667	active	TRUE	FALSE
WBGene00044502	2.04765	0.00019736	H3K27me3	FALSE	FALSE
WBGene00008302	2.12738	0.00019921	H3K27me3	FALSE	FALSE
WBGene00018921	2.33729	0.000222333	active	TRUE	TRUE
WBGene00044212	2.53796	0.00025379	H3K27me3	FALSE	TRUE
WBGene00001977	1.64592	0.000264787	active	FALSE	FALSE
WBGene00010787	1.81004	0.000285742	active	FALSE	FALSE
WBGene00013409	2.57973	0.000294091	active	TRUE	TRUE
WBGene00010034	1.65339	0.000303008	na	FALSE	FALSE
WBGene00017508	2.17226	0.000319218	H3K27me3	TRUE	FALSE
WBGene00000770	2.41794	0.000333972	H3K27me3	FALSE	FALSE
WBGene00016985	2.46116	0.000362831	na	TRUE	TRUE
WBGene00013758	1.65716	0.000398934	active	FALSE	FALSE
WBGene00009951	1.71	0.000430177	active	FALSE	FALSE
WBGene00019600	1.67213	0.000449926	active	FALSE	FALSE
WBGene00010227	1.70697	0.000463945	H3K27me3	FALSE	FALSE
WBGene00017959	1.95342	0.000463945	H3K27me3	FALSE	FALSE
WBGene00012640	2.11337	0.000469227	active	TRUE	FALSE
WBGene00004093	1.8361	0.000512005	active	TRUE	TRUE
WBGene00017461	1.74775	0.000566081	H3K27me3	FALSE	FALSE
WBGene00001387	1.78248	0.000614484	H3K27me3	FALSE	FALSE
WBGene00009247	2.25828	0.000638535	active	FALSE	TRUE
WBGene00003992	1.56642	0.000659086	active	FALSE	FALSE
WBGene00012481	2.00747	0.000683628	active	TRUE	TRUE
WBGene00219399	2.21902	0.000688994	active	TRUE	TRUE
WBGene00015449	2.15601	0.000710524	H3K27me3	FALSE	FALSE
WBGene00020364	2.16552	0.000713746	H3K27me3	FALSE	TRUE
WBGene00001397	2.53598	0.000737992	H3K27me3	TRUE	TRUE
WBGene00007297	1.42765	0.000769688	H3K27me3	FALSE	FALSE
WBGene00021458	2.28173	0.000828229	active	TRUE	FALSE
WBGene00013425	1.50041	0.00083952	H3K27me3	TRUE	FALSE
WBGene00021654	1.86801	0.000870226	H3K27me3	FALSE	TRUE
WBGene00016573	1.57864	0.000876032	active	TRUE	TRUE
WBGene00022497	1.74461	0.000876032	active	TRUE	TRUE
WBGene00009054	1.50064	0.000892932	active	FALSE	FALSE
WBGene00018345	2.16344	0.000914025	H3K27me3	FALSE	FALSE
WBGene00001110	1.56298	0.000916487	H3K27me3	FALSE	FALSE
WBGene00019511	1.59431	0.000921746	active	TRUE	TRUE
WBGene00017460	1.85848	0.000922798	H3K27me3	FALSE	TRUE
WBGene00009113	2.09874	0.000952122	active	TRUE	FALSE
WBGene00044290	1.6755	0.00102302	active	FALSE	FALSE
WBGene00020962	1.57917	0.00106998	active	TRUE	TRUE
WBGene00018668	1.85573	0.00123394	H3K27me3	TRUE	TRUE
WBGene00194892	1.71437	0.00124352	active	FALSE	FALSE
WBGene00003704	1.57786	0.00130817	active	TRUE	FALSE
WBGene00010719	2.22818	0.00130817	active	TRUE	FALSE
WBGene00003835	1.5781	0.0013526	active	FALSE	FALSE
WBGene00015152	2.24939	0.00146992	H3K27me3	FALSE	FALSE
WBGene00008417	1.65457	0.00153122	active	FALSE	FALSE
WBGene00000252	2.28034	0.00194492	active	FALSE	FALSE
WBGene00004955	1.7189	0.00199165	active	FALSE	FALSE
WBGene00004333	1.83457	0.00206975	H3K27me3	FALSE	FALSE
WBGene00009061	2.29678	0.00206975	H3K27me3	FALSE	TRUE
WBGene00010194	2.11078	0.00208692	active	FALSE	FALSE
WBGene00012835	1.69254	0.00212386	H3K27me3	TRUE	TRUE
WBGene00012919	2.31811	0.00224437	H3K27me3	FALSE	FALSE
WBGene00021098	1.94053	0.00236777	active	FALSE	FALSE
WBGene00007303	1.86266	0.00238127	active	FALSE	FALSE
WBGene00001571	1.6047	0.00251146	active	FALSE	FALSE
WBGene00016336	2.11	0.00257088	H3K27me3	TRUE	TRUE
WBGene00013252	1.67853	0.00270809	active	FALSE	FALSE
WBGene00000473	1.62857	0.00278001	active	TRUE	FALSE
WBGene00194852	1.85636	0.00302992	active	FALSE	FALSE
WBGene00013248	1.59488	0.00326815	active	FALSE	TRUE
WBGene00012456	1.89069	0.00339595	H3K27me3	FALSE	FALSE
WBGene00013894	1.48498	0.00373164	active	FALSE	FALSE
WBGene00007723	2.11588	0.00378945	H3K27me3	FALSE	TRUE
WBGene00007660	2.13222	0.00390884	H3K27me3	FALSE	TRUE
WBGene00012400	2.25937	0.0040162	H3K27me3	FALSE	FALSE
WBGene00022452	1.84007	0.00403766	active	TRUE	FALSE
WBGene00013365	1.25374	0.00405231	active	TRUE	TRUE
WBGene00086560	2.26867	0.00429022	H3K27me3	FALSE	TRUE
WBGene00015015	2.23326	0.00438803	H3K27me3	TRUE	TRUE
WBGene00019997	1.68765	0.00446653	H3K27me3	TRUE	TRUE
WBGene00011376	1.39392	0.00452717	active	FALSE	FALSE
WBGene00015386	1.98328	0.00452717	active	FALSE	FALSE
WBGene00018424	2.20155	0.00464292	active	FALSE	FALSE
WBGene00018289	1.89271	0.00480343	H3K27me3	FALSE	FALSE
WBGene00022531	1.35912	0.00496618	active	FALSE	FALSE
WBGene00194695	1.872	0.00509796	H3K27me3	FALSE	TRUE
WBGene00219451	1.5092	0.0051446	na	FALSE	TRUE
WBGene00001482	1.66011	0.00518272	active	FALSE	FALSE
WBGene00015504	1.81971	0.00518272	active	FALSE	FALSE
WBGene00011435	1.71154	0.00526725	H3K27me3	TRUE	FALSE
WBGene00018065	2.22685	0.0055388	active	TRUE	TRUE
WBGene00015598	2.21911	0.00578143	H3K27me3	FALSE	TRUE
WBGene00004808	1.41282	0.00580245	active	FALSE	FALSE
WBGene00021585	2.21369	0.00588988	H3K27me3	FALSE	TRUE
WBGene00008384	1.58755	0.00597886	active	FALSE	FALSE
WBGene00010928	2.13723	0.00617911	H3K27me3	FALSE	TRUE
WBGene00007290	2.20504	0.00621927	na	TRUE	TRUE
WBGene00012435	1.35223	0.00642676	active	FALSE	FALSE
WBGene00013361	1.22733	0.00666179	active	TRUE	TRUE
WBGene00001686	1.76402	0.00680861	active	FALSE	FALSE
WBGene00007797	1.50315	0.007061	active	TRUE	FALSE
WBGene00002144	1.76896	0.0074947	active	TRUE	FALSE
WBGene00012299	1.75553	0.00794789	na	TRUE	FALSE
WBGene00000882	1.36409	0.00836621	active	FALSE	FALSE
WBGene00001598	1.65056	0.00836621	active	FALSE	FALSE
WBGene00017658	1.67185	0.00836621	H3K27me3	FALSE	FALSE
WBGene00019142	1.48841	0.00845339	H3K27me3	FALSE	TRUE
WBGene00002214	1.46875	0.00900343	active	FALSE	FALSE
WBGene00004049	1.22863	0.00905083	active	TRUE	FALSE
WBGene00015819	1.58385	0.009154	active	FALSE	FALSE
WBGene00019429	1.29661	0.00925291	active	TRUE	FALSE
WBGene00004952	1.31414	0.009365	active	TRUE	FALSE
WBGene00013294	2.10287	0.009365	H3K27me3	FALSE	FALSE
WBGene00020652	1.75065	0.0100327	active	FALSE	FALSE
WBGene00235133	1.96011	0.0101615	H3K27me3	FALSE	FALSE
WBGene00001595	1.55041	0.0108566	active	FALSE	FALSE
WBGene00002143	1.2973	0.0108566	active	TRUE	FALSE
WBGene00018838	1.64562	0.0114783	na	TRUE	FALSE
WBGene00015602	2.01445	0.0120722	H3K27me3	FALSE	TRUE
WBGene00021116	1.34351	0.0120722	active	TRUE	TRUE
WBGene00012220	1.30446	0.0122238	active	TRUE	FALSE
WBGene00021199	2.08563	0.0122238	active	FALSE	FALSE
WBGene00011333	1.17163	0.0126714	active	FALSE	FALSE
WBGene00021492	1.50024	0.0132915	active	TRUE	TRUE
WBGene00007109	1.38015	0.0138257	active	FALSE	FALSE
WBGene00018611	1.53019	0.0139128	active	FALSE	FALSE
WBGene00002034	1.53273	0.0141991	active	FALSE	FALSE
WBGene00008301	1.62159	0.0143445	H3K27me3	FALSE	FALSE
WBGene00018783	2.05613	0.0145717	active	TRUE	TRUE
WBGene00003002	1.07908	0.0146198	active	FALSE	FALSE
WBGene00019978	1.929	0.0148276	H3K27me3	FALSE	FALSE
WBGene00013358	1.0921	0.0148467	active	FALSE	TRUE
WBGene00044182	2.03432	0.0149735	H3K27me3	FALSE	TRUE
WBGene00021463	1.93362	0.0154226	H3K27me3	TRUE	TRUE
WBGene00009404	1.40563	0.0154408	H3K27me3	FALSE	FALSE
WBGene00012524	1.33833	0.0164485	H3K27me3	TRUE	TRUE
WBGene00021801	2.02556	0.0169104	active	TRUE	TRUE
WBGene00011959	1.2575	0.0170652	H3K27me3	FALSE	FALSE
WBGene00004157	1.34023	0.0172172	H3K27me3	FALSE	FALSE
WBGene00013755	1.2951	0.0173481	H3K27me3	FALSE	TRUE
WBGene00016632	1.15519	0.0180893	active	FALSE	FALSE
WBGene00022390	1.37358	0.0183649	active	TRUE	TRUE
WBGene00011613	1.64164	0.0185322	na	TRUE	TRUE
WBGene00019513	1.15954	0.018712	active	FALSE	FALSE
WBGene00014046	1.92565	0.0188931	H3K27me3	FALSE	FALSE
WBGene00017127	1.49906	0.0190649	H3K27me3	FALSE	FALSE
WBGene00017128	1.37866	0.0190649	H3K27me3	FALSE	FALSE
WBGene00016086	1.60573	0.019219	na	FALSE	FALSE
WBGene00011539	1.88503	0.0193265	H3K27me3	FALSE	FALSE
WBGene00021555	1.43456	0.0193403	active	TRUE	FALSE
WBGene00235300	1.99252	0.0193403	active	TRUE	TRUE
WBGene00007132	1.82639	0.0196398	active	FALSE	FALSE
WBGene00015236	1.69126	0.0196987	H3K27me3	FALSE	FALSE
WBGene00012947	1.8599	0.0200293	H3K27me3	FALSE	FALSE
WBGene00006544	1.59927	0.0206971	active	FALSE	FALSE
WBGene00012649	1.98002	0.0219781	active	FALSE	FALSE
WBGene00010477	1.50469	0.0220937	active	TRUE	FALSE
WBGene00007966	1.55782	0.0223904	active	TRUE	FALSE
WBGene00013364	1.69923	0.0224456	active	TRUE	TRUE
WBGene00003107	1.38582	0.0229934	active	FALSE	FALSE
WBGene00005188	1.86214	0.0229934	H3K27me3	FALSE	FALSE
WBGene00012829	1.03875	0.0230577	active	TRUE	FALSE
WBGene00016274	1.04845	0.0230577	H3K27me3	FALSE	FALSE
WBGene00012046	1.49821	0.0234355	H3K27me3	FALSE	FALSE
WBGene00000622	1.95579	0.0234398	active	TRUE	TRUE
WBGene00045308	1.94284	0.0236924	active	TRUE	FALSE
WBGene00009824	1.78444	0.0237162	H3K27me3	FALSE	FALSE
WBGene00018671	1.82832	0.0248814	H3K27me3	FALSE	TRUE
WBGene00044638	1.38324	0.0252695	na	TRUE	FALSE
WBGene00008145	1.38053	0.0261932	active	FALSE	FALSE
WBGene00009937	1.39237	0.026316	active	FALSE	FALSE
WBGene00021579	1.92161	0.0270639	H3K27me3	FALSE	TRUE
WBGene00019448	1.3629	0.0279031	H3K27me3	FALSE	FALSE
WBGene00012952	1.56078	0.0280142	active	FALSE	FALSE
WBGene00019070	1.85477	0.0280142	H3K27me3	FALSE	TRUE
WBGene00009393	1.0393	0.0294009	H3K27me3	TRUE	TRUE
WBGene00022203	1.5014	0.0303759	na	TRUE	TRUE
WBGene00013445	1.50238	0.0313215	active	TRUE	FALSE
WBGene00020464	1.17308	0.0318244	active	FALSE	FALSE
WBGene00013492	1.22563	0.0330058	H3K27me3	FALSE	TRUE
WBGene00021008	1.28586	0.0332397	H3K27me3	FALSE	FALSE
WBGene00000499	1.51462	0.033423	active	TRUE	TRUE
WBGene00050906	1.89354	0.0340102	H3K27me3	FALSE	TRUE
WBGene00003581	1.03629	0.0345218	active	TRUE	FALSE
WBGene00003015	1.28676	0.0345301	active	FALSE	FALSE
WBGene00009148	1.69059	0.0349169	active	FALSE	TRUE
WBGene00015662	1.85273	0.0353587	na	FALSE	FALSE
WBGene00022108	1.75372	0.0370778	active	TRUE	TRUE
WBGene00009173	1.59608	0.0373104	active	FALSE	FALSE
WBGene00013125	1.84963	0.0373104	H3K27me3	TRUE	TRUE
WBGene00018991	1.33287	0.0376171	H3K27me3	TRUE	TRUE
WBGene00022548	1.52453	0.0386836	H3K27me3	FALSE	FALSE
WBGene00006916	0.985285	0.0416311	active	FALSE	FALSE
WBGene00001842	1.75475	0.041632	H3K27me3	FALSE	FALSE
WBGene00012812	1.31709	0.042132	H3K27me3	TRUE	TRUE
WBGene00012828	1.14364	0.042132	active	TRUE	TRUE
WBGene00013270	1.2267	0.0428957	active	FALSE	FALSE
WBGene00006925	1.40867	0.0443449	na	FALSE	TRUE
WBGene00012251	1.42348	0.045043	H3K27me3	FALSE	TRUE
WBGene00003994	1.42179	0.0463623	H3K27me3	FALSE	FALSE
WBGene00010174	1.11494	0.0463623	H3K27me3	FALSE	FALSE
WBGene00022140	1.38981	0.0463623	active	TRUE	TRUE
WBGene00008099	1.11122	0.0483124	H3K27me3	FALSE	FALSE
WBGene00013820	1.51857	0.0493527	H3K27me3	TRUE	TRUE

## Sheet: down
GeneID	log2(FC)	P-adj	Domain	H3K9me2_marked	H3K9me3_marked
WBGene00010256	-3.61914	5.02366e-15	H3K27me3	FALSE	FALSE
WBGene00017553	-4.4032	1.37037e-14	H3K27me3	FALSE	TRUE
WBGene00000986	-3.04696	2.20746e-10	H3K27me3	FALSE	FALSE
WBGene00019587	-3.47719	5.19431e-09	H3K27me3	FALSE	TRUE
WBGene00019565	-3.05601	1.02061e-07	H3K27me3	FALSE	FALSE
WBGene00044811	-2.55954	1.06309e-06	H3K27me3	FALSE	TRUE
WBGene00022181	-2.17489	8.06699e-06	H3K27me3	TRUE	TRUE
WBGene00020976	-2.82633	1.05591e-05	H3K27me3	FALSE	FALSE
WBGene00044534	-2.27996	1.17064e-05	H3K27me3	FALSE	FALSE
WBGene00016598	-2.3265	4.5754e-05	H3K27me3	FALSE	FALSE
WBGene00022303	-2.86431	6.05086e-05	H3K27me3	FALSE	FALSE
WBGene00019404	-1.96796	7.59021e-05	na	FALSE	FALSE
WBGene00004146	-1.86588	0.000141105	H3K27me3	FALSE	FALSE
WBGene00017068	-1.71612	0.00025379	H3K27me3	FALSE	FALSE
WBGene00007691	-2.00355	0.000382625	na	FALSE	FALSE
WBGene00020040	-1.48464	0.000382625	H3K27me3	FALSE	FALSE
WBGene00015400	-1.70691	0.000398934	H3K27me3	FALSE	FALSE
WBGene00003531	-1.64683	0.000419516	active	FALSE	FALSE
WBGene00010926	-1.95604	0.000446717	na	FALSE	FALSE
WBGene00019653	-1.88313	0.000531353	H3K27me3	FALSE	FALSE
WBGene00004118	-1.75235	0.000541707	H3K27me3	FALSE	FALSE
WBGene00020017	-1.66411	0.000604383	H3K27me3	TRUE	FALSE
WBGene00001695	-1.65897	0.000899462	active	FALSE	FALSE
WBGene00010754	-2.16707	0.00105075	H3K27me3	FALSE	TRUE
WBGene00019060	-1.54799	0.00130817	H3K27me3	FALSE	FALSE
WBGene00044569	-1.92531	0.0013254	na	FALSE	FALSE
WBGene00008043	-1.84936	0.00136054	H3K27me3	FALSE	FALSE
WBGene00011949	-1.67241	0.00138743	H3K27me3	FALSE	FALSE
WBGene00009110	-1.55532	0.00159271	H3K27me3	FALSE	FALSE
WBGene00000082	-1.33664	0.00166868	na	FALSE	FALSE
WBGene00008047	-1.63173	0.00199165	na	FALSE	FALSE
WBGene00008829	-1.81294	0.00199165	H3K27me3	FALSE	FALSE
WBGene00013906	-1.43629	0.00219517	H3K27me3	FALSE	FALSE
WBGene00194658	-2.31571	0.0023529	H3K27me3	FALSE	FALSE
WBGene00003684	-1.52203	0.00247882	H3K27me3	FALSE	FALSE
WBGene00011112	-1.46869	0.00310708	H3K27me3	FALSE	FALSE
WBGene00019721	-1.96556	0.0031152	H3K27me3	TRUE	FALSE
WBGene00018351	-1.63858	0.00322855	H3K27me3	FALSE	FALSE
WBGene00012921	-2.09767	0.00378945	H3K27me3	FALSE	FALSE
WBGene00010989	-1.70036	0.00480712	H3K27me3	TRUE	TRUE
WBGene00010473	-1.9144	0.00512898	active	FALSE	FALSE
WBGene00008559	-1.30337	0.00524726	active	FALSE	FALSE
WBGene00012113	-1.97333	0.00536509	active	FALSE	FALSE
WBGene00000412	-1.70338	0.0055388	H3K27me3	FALSE	FALSE
WBGene00001710	-1.82734	0.0055388	H3K27me3	FALSE	FALSE
WBGene00022374	-1.60674	0.00577688	H3K27me3	TRUE	TRUE
WBGene00010274	-1.49721	0.00587061	H3K27me3	FALSE	FALSE
WBGene00017199	-2.1234	0.00592439	H3K27me3	FALSE	FALSE
WBGene00015930	-1.55128	0.00635287	H3K27me3	FALSE	FALSE
WBGene00020670	-1.57288	0.00639637	na	FALSE	FALSE
WBGene00018755	-1.55389	0.00767207	H3K27me3	FALSE	FALSE
WBGene00020766	-1.44024	0.0079263	na	FALSE	FALSE
WBGene00017073	-1.53231	0.00941451	active	FALSE	FALSE
WBGene00017565	-1.33865	0.00941451	H3K27me3	FALSE	FALSE
WBGene00011185	-1.96242	0.00986447	H3K27me3	FALSE	FALSE
WBGene00007903	-1.57821	0.0108566	na	FALSE	FALSE
WBGene00020039	-1.32272	0.0109678	H3K27me3	FALSE	FALSE
WBGene00010906	-1.43291	0.0110448	active	FALSE	FALSE
WBGene00008449	-1.58643	0.0111686	na	FALSE	TRUE
WBGene00007455	-1.42945	0.0116661	H3K27me3	FALSE	FALSE
WBGene00019184	-1.30894	0.0116997	H3K27me3	TRUE	TRUE
WBGene00019232	-1.44853	0.0117361	H3K27me3	FALSE	FALSE
WBGene00013088	-1.45958	0.0117946	H3K27me3	FALSE	FALSE
WBGene00000603	-1.2912	0.0122222	H3K27me3	FALSE	FALSE
WBGene00015044	-1.78077	0.0122238	H3K27me3	FALSE	FALSE
WBGene00020141	-1.50905	0.0126466	H3K27me3	FALSE	FALSE
WBGene00195051	-1.57465	0.0126753	active	FALSE	FALSE
WBGene00000641	-1.29772	0.0143612	H3K27me3	FALSE	TRUE
WBGene00011197	-2.05581	0.0146198	H3K27me3	FALSE	FALSE
WBGene00007228	-1.44295	0.0148276	active	FALSE	FALSE
WBGene00018026	-1.51564	0.0149287	na	FALSE	FALSE
WBGene00009904	-1.76192	0.0152711	H3K27me3	FALSE	FALSE
WBGene00010125	-1.60945	0.0159041	H3K27me3	FALSE	FALSE
WBGene00010832	-1.77314	0.0171148	H3K27me3	FALSE	FALSE
WBGene00016130	-1.65265	0.0176181	active	FALSE	FALSE
WBGene00000672	-1.07884	0.0182572	H3K27me3	FALSE	TRUE
WBGene00016468	-1.35412	0.0182981	na	FALSE	FALSE
WBGene00011305	-1.34089	0.0185715	active	FALSE	FALSE
WBGene00009982	-1.19175	0.0199558	active	FALSE	FALSE
WBGene00003526	-1.37749	0.0201921	H3K27me3	FALSE	FALSE
WBGene00000687	-1.13104	0.0202456	active	FALSE	FALSE
WBGene00044016	-1.78337	0.0206672	H3K27me3	FALSE	FALSE
WBGene00017077	-1.52958	0.0225984	active	FALSE	FALSE
WBGene00019756	-1.3985	0.0225984	H3K27me3	FALSE	FALSE
WBGene00004174	-1.24882	0.0236415	active	FALSE	FALSE
WBGene00013541	-1.28305	0.0237162	H3K27me3	TRUE	FALSE
WBGene00000932	-1.72698	0.024073	H3K27me3	FALSE	FALSE
WBGene00010277	-1.56158	0.025199	H3K27me3	FALSE	FALSE
WBGene00017009	-1.51694	0.0264659	H3K27me3	FALSE	FALSE
WBGene00011235	-1.30885	0.0274771	active	FALSE	FALSE
WBGene00005949	-1.75106	0.0280142	H3K27me3	FALSE	FALSE
WBGene00015369	-1.6927	0.0286856	H3K27me3	FALSE	FALSE
WBGene00019089	-1.84275	0.0289054	H3K27me3	FALSE	FALSE
WBGene00017736	-1.58021	0.0307663	active	TRUE	TRUE
WBGene00011468	-1.30049	0.0309061	H3K27me3	FALSE	FALSE
WBGene00007422	-1.09861	0.0312716	H3K27me3	FALSE	FALSE
WBGene00016595	-1.61959	0.0313903	H3K27me3	FALSE	FALSE
WBGene00019487	-1.06404	0.0325092	H3K27me3	FALSE	FALSE
WBGene00008652	-1.17584	0.0326127	H3K27me3	FALSE	FALSE
WBGene00015458	-1.72973	0.033423	H3K27me3	FALSE	FALSE
WBGene00011041	-1.77416	0.0345865	H3K27me3	FALSE	FALSE
WBGene00008810	-1.52276	0.0369519	H3K27me3	FALSE	FALSE
WBGene00019174	-1.79039	0.0369519	H3K27me3	FALSE	FALSE
WBGene00012942	-1.33761	0.0376171	H3K27me3	FALSE	FALSE
WBGene00010705	-1.31661	0.0398645	na	FALSE	FALSE
WBGene00003542	-1.353	0.041632	H3K27me3	FALSE	FALSE
WBGene00019830	-1.69012	0.0416489	na	FALSE	FALSE
WBGene00017091	-1.57015	0.0426939	H3K27me3	FALSE	FALSE
WBGene00021805	-1.83929	0.0426939	active	TRUE	TRUE
WBGene00008557	-1.29921	0.0443449	active	FALSE	FALSE
WBGene00013646	-1.8409	0.0443807	H3K27me3	FALSE	FALSE
WBGene00019525	-1.78433	0.0463623	H3K27me3	FALSE	FALSE
WBGene00021212	-1.66057	0.0469153	H3K27me3	TRUE	FALSE
WBGene00020260	-1.36689	0.0477217	active	FALSE	FALSE
