# Supplementary material for: Accessible Region Conformation Capture (ARC-C) gives high-resolution insights into genome architecture and regulation
Source: Genome Res. 2022 Feb;32(2):357–66. doi: 10.1101/gr.275669.121 (PMC8805715; doi:10.1101/gr.275669.121)
Supplement: Supplemental Material [file supp_gr.275669.121_Supplemental_TableS2.xlsx]

## Sheet: Legend
Table S2 Significant interactions
location1	location 1 coordinates
annotation_1	regulatory annotation if bin overlaps element identified in Janes et al 2018 (coding_promoter, unassigned_promoter, pseudogene-promoter, non-coding, putative_enhancer, no_activity); no_anotation if no overlap
class1	annotation class: promoter (coding_promoter, unassigned_promoter, pseudogene_promoter, non-coding), enhancer (putative_enhancer), other (no_activity, no_annotation)
bin.id1	unique ID
cis1_reads	number of cis reads mapping to bin
trans1_reads	number of trans reads mapping to bin
location2	location 2 coordinates
annotation_2	as above
class2	as above
bin.id2	as above
cis2_reads	as above
trans2_reads	as above
read.pairs	number of read pairs linking bins
distance	distance between bins
padj

## Sheet: Significant interactions
location1	annotation	class1	bin.id1	cis1_reads	trans1_reads	location2	annotation	class2	bin.id2	cis2_reads	trans2_reads	read.pairs	distance	padj
chrI:10002511-10003011	putative_enhancer	enhancer	19178	383	73	chrI:9984876-9985376	putative_enhancer	enhancer	19144	1823	305	20	17635	8.29e-11
chrI:1000725-1001225	putative_enhancer	enhancer	1923	925	192	chrI:979372-979872	putative_enhancer	enhancer	1886	320	57	15	21353	8.29e-11
chrI:1000725-1001225	putative_enhancer	enhancer	1923	925	192	chrI:982905-983405	putative_enhancer	enhancer	1893	317	69	15	17820	1.18e-08
chrI:1000725-1001225	putative_enhancer	enhancer	1923	925	192	chrI:999035-999535	putative_enhancer	enhancer	1921	1300	255	158	1690	8.29e-11
chrI:1000725-1001225	putative_enhancer	enhancer	1923	925	192	chrI:1295375-1295875	putative_enhancer	enhancer	2490	379	82	6	294650	0.000427344
chrI:1000725-1001225	putative_enhancer	enhancer	1923	925	192	chrI:1836713-1837213	putative_enhancer	enhancer	3532	1837	542	6	835988	0.00309551
chrI:10032440-10032891	putative_enhancer	enhancer	19233	666	128	chrI:9984876-9985376	putative_enhancer	enhancer	19144	1823	305	11	47539	0.000648528
chrI:10032440-10032891	putative_enhancer	enhancer	19233	666	128	chrI:10034893-10035362	putative_enhancer	enhancer	19239	1193	291	33	2462	9.8e-08
chrI:10032440-10032891	putative_enhancer	enhancer	19233	666	128	chrI:10035797-10036228	putative_enhancer	enhancer	19241	567	124	33	3347	8.29e-11
chrI:10034893-10035362	putative_enhancer	enhancer	19239	1193	291	chrI:9984876-9985376	putative_enhancer	enhancer	19144	1823	305	20	50001	8.29e-11
chrI:10057414-10057914	putative_enhancer	enhancer	19283	427	54	chrI:9984876-9985376	putative_enhancer	enhancer	19144	1823	305	10	72538	2.1e-05
chrI:10057414-10057914	putative_enhancer	enhancer	19283	427	54	chrI:10059145-10059645	putative_enhancer	enhancer	19286	544	96	37	1731	8.29e-11
chrI:10060051-10060551	putative_enhancer	enhancer	19287	242	73	chrI:10104049-10104549	putative_enhancer	enhancer	19369	868	182	7	43998	0.0109704
chrI:10089085-10089585	putative_enhancer	enhancer	19342	341	100	chrI:10102176-10102640	putative_enhancer	enhancer	19366	244	76	8	13073	0.0293932
chrI:10097133-10097633	putative_enhancer	enhancer	19358	560	189	chrI:9984876-9985376	putative_enhancer	enhancer	19144	1823	305	11	112257	6.08e-07
chrI:10103024-10103448	putative_enhancer	enhancer	19367	515	102	chrI:9984876-9985376	putative_enhancer	enhancer	19144	1823	305	8	118110	0.000394716
chrI:10103024-10103448	putative_enhancer	enhancer	19367	515	102	chrI:10104049-10104549	putative_enhancer	enhancer	19369	868	182	38	1063	5.04e-07
chrI:10278895-10279395	putative_enhancer	enhancer	19706	289	73	chrI:10296337-10296810	putative_enhancer	enhancer	19737	312	87	7	17428	0.0243132
chrI:10403686-10404162	putative_enhancer	enhancer	19939	557	115	chrI:10409325-10409814	putative_enhancer	enhancer	19950	588	113	17	5645	2.71e-05
chrI:10561321-10561795	putative_enhancer	enhancer	20246	385	65	chrI:10562421-10562894	putative_enhancer	enhancer	20248	1396	334	41	1099	1.61e-07
chrI:10562421-10562894	putative_enhancer	enhancer	20248	1396	334	chrI:10769692-10770192	putative_enhancer	enhancer	20646	1804	401	12	207285	1.13e-08
chrI:10691743-10692243	putative_enhancer	enhancer	20498	549	93	chrI:10769692-10770192	putative_enhancer	enhancer	20646	1804	401	9	77949	0.00284071
chrI:10746338-10746838	putative_enhancer	enhancer	20604	335	93	chrI:10755697-10756197	putative_enhancer	enhancer	20620	403	100	11	9359	7.29e-06
chrI:10747992-10748446	putative_enhancer	enhancer	20606	453	76	chrI:10754169-10754597	putative_enhancer	enhancer	20618	388	70	11	6164	0.0013775
chrI:10747992-10748446	putative_enhancer	enhancer	20606	453	76	chrI:10769692-10770192	putative_enhancer	enhancer	20646	1804	401	10	21723	0.0321153
chrI:10751998-10752446	putative_enhancer	enhancer	20613	720	122	chrI:10757870-10758370	putative_enhancer	enhancer	20624	800	173	31	5898	8.29e-11
chrI:10751998-10752446	putative_enhancer	enhancer	20613	720	122	chrI:10769692-10770192	putative_enhancer	enhancer	20646	1804	401	21	17720	8.29e-11
chrI:10751998-10752446	putative_enhancer	enhancer	20613	720	122	chrI:10777281-10777781	putative_enhancer	enhancer	20662	870	140	14	25309	3.98e-09
chrI:10753305-10753716	putative_enhancer	enhancer	20616	271	68	chrI:10766582-10767011	putative_enhancer	enhancer	20641	414	102	8	13286	9.18e-05
chrI:10753741-10754169	putative_enhancer	enhancer	20617	488	102	chrI:10758402-10758902	putative_enhancer	enhancer	20625	452	107	16	4697	1e-07
chrI:10753741-10754169	putative_enhancer	enhancer	20617	488	102	chrI:10760607-10761027	putative_enhancer	enhancer	20629	421	79	10	6862	0.00677697
chrI:10753741-10754169	putative_enhancer	enhancer	20617	488	102	chrI:10761649-10762104	putative_enhancer	enhancer	20631	499	88	10	7921	0.0222107
chrI:10753741-10754169	putative_enhancer	enhancer	20617	488	102	chrI:10769692-10770192	putative_enhancer	enhancer	20646	1804	401	22	15987	8.29e-11
chrI:10754169-10754597	putative_enhancer	enhancer	20618	388	70	chrI:10769692-10770192	putative_enhancer	enhancer	20646	1804	401	15	15559	9.43e-07
chrI:10755697-10756197	putative_enhancer	enhancer	20620	403	100	chrI:10769692-10770192	putative_enhancer	enhancer	20646	1804	401	11	13995	0.0287904
chrI:10757870-10758370	putative_enhancer	enhancer	20624	800	173	chrI:10760607-10761027	putative_enhancer	enhancer	20629	421	79	20	2697	9.64e-07
chrI:10757870-10758370	putative_enhancer	enhancer	20624	800	173	chrI:10769692-10770192	putative_enhancer	enhancer	20646	1804	401	25	11822	8.29e-11
chrI:10757870-10758370	putative_enhancer	enhancer	20624	800	173	chrI:10777281-10777781	putative_enhancer	enhancer	20662	870	140	20	19411	8.29e-11
chrI:10761649-10762104	putative_enhancer	enhancer	20631	499	88	chrI:10769692-10770192	putative_enhancer	enhancer	20646	1804	401	22	8066	3.89e-08
chrI:10762104-10762559	putative_enhancer	enhancer	20632	491	110	chrI:10765614-10766114	putative_enhancer	enhancer	20639	556	140	21	3533	4.63e-08
chrI:10762104-10762559	putative_enhancer	enhancer	20632	491	110	chrI:10768624-10769071	putative_enhancer	enhancer	20644	439	112	13	6516	4.92e-05
chrI:10762104-10762559	putative_enhancer	enhancer	20632	491	110	chrI:10769692-10770192	putative_enhancer	enhancer	20646	1804	401	19	7611	7.31e-05
chrI:10765614-10766114	putative_enhancer	enhancer	20639	556	140	chrI:10769692-10770192	putative_enhancer	enhancer	20646	1804	401	42	4078	8.29e-11
chrI:10765614-10766114	putative_enhancer	enhancer	20639	556	140	chrI:10777281-10777781	putative_enhancer	enhancer	20662	870	140	14	11667	1.56e-05
chrI:10766582-10767011	putative_enhancer	enhancer	20641	414	102	chrI:10769692-10770192	putative_enhancer	enhancer	20646	1804	401	27	3146	6.63e-09
chrI:10768624-10769071	putative_enhancer	enhancer	20644	439	112	chrI:10769692-10770192	putative_enhancer	enhancer	20646	1804	401	43	1095	1.46e-05
chrI:10769692-10770192	putative_enhancer	enhancer	20646	1804	401	chrI:10777281-10777781	putative_enhancer	enhancer	20662	870	140	42	7589	8.29e-11
chrI:10992509-10993009	putative_enhancer	enhancer	21077	236	61	chrI:11002510-11003010	putative_enhancer	enhancer	21097	188	47	11	10001	3.49e-05
chrI:11188001-11188501	putative_enhancer	enhancer	21455	765	206	chrI:11190914-11191414	putative_enhancer	enhancer	21461	179	35	26	2913	8.29e-11
chrI:11188001-11188501	putative_enhancer	enhancer	21455	765	206	chrI:11198072-11198533	putative_enhancer	enhancer	21474	220	58	12	10051	0.00328837
chrI:11188001-11188501	putative_enhancer	enhancer	21455	765	206	chrI:11203164-11203664	putative_enhancer	enhancer	21483	779	174	24	15163	8.29e-11
chrI:11196574-11196960	putative_enhancer	enhancer	21471	511	97	chrI:11203164-11203664	putative_enhancer	enhancer	21483	779	174	17	6647	5.36e-05
chrI:11778942-11779442	putative_enhancer	enhancer	22606	868	165	chrI:11782236-11782736	putative_enhancer	enhancer	22611	637	95	42	3294	8.29e-11
chrI:11778942-11779442	putative_enhancer	enhancer	22606	868	165	chrI:11784419-11784832	putative_enhancer	enhancer	22615	374	83	16	5433	0.00226053
chrI:11778942-11779442	putative_enhancer	enhancer	22606	868	165	chrI:11785874-11786323	putative_enhancer	enhancer	22618	285	52	16	6906	4.8e-06
chrI:11782236-11782736	putative_enhancer	enhancer	22611	637	95	chrI:11784419-11784832	putative_enhancer	enhancer	22615	374	83	25	2139	2.27e-06
chrI:11784419-11784832	putative_enhancer	enhancer	22615	374	83	chrI:11785874-11786323	putative_enhancer	enhancer	22618	285	52	20	1473	1.05e-05
chrI:11825332-11825757	putative_enhancer	enhancer	22692	160	40	chrI:11829975-11830475	putative_enhancer	enhancer	22701	370	60	16	4681	5.62e-08
chrI:11829975-11830475	putative_enhancer	enhancer	22701	370	60	chrI:11842352-11842852	putative_enhancer	enhancer	22724	288	65	15	12377	1.57e-09
chrI:11839433-11839933	putative_enhancer	enhancer	22719	289	69	chrI:11840660-11841160	putative_enhancer	enhancer	22721	831	170	39	1227	3.31e-10
chrI:11840660-11841160	putative_enhancer	enhancer	22721	831	170	chrI:11842352-11842852	putative_enhancer	enhancer	22724	288	65	24	1692	0.00107559
chrI:11840660-11841160	putative_enhancer	enhancer	22721	831	170	chrI:11875986-11876486	putative_enhancer	enhancer	22789	510	111	17	35326	8.29e-11
chrI:11874843-11875238	putative_enhancer	enhancer	22787	288	55	chrI:11875986-11876486	putative_enhancer	enhancer	22789	510	111	24	1196	0.0155451
chrI:1226101-1226535	putative_enhancer	enhancer	2360	280	83	chrI:1227705-1228205	putative_enhancer	enhancer	2363	441	98	21	1637	0.00291539
chrI:1251400-1251900	putative_enhancer	enhancer	2408	811	168	chrI:1255891-1256391	putative_enhancer	enhancer	2417	518	110	43	4491	8.29e-11
chrI:1251400-1251900	putative_enhancer	enhancer	2408	811	168	chrI:1261453-1261953	putative_enhancer	enhancer	2426	304	61	15	10053	9.12e-05
chrI:1251400-1251900	putative_enhancer	enhancer	2408	811	168	chrI:1271332-1271761	putative_enhancer	enhancer	2445	308	87	13	19896	4.66e-08
chrI:1251400-1251900	putative_enhancer	enhancer	2408	811	168	chrI:1273775-1274275	putative_enhancer	enhancer	2449	707	216	34	22375	8.29e-11
chrI:1251400-1251900	putative_enhancer	enhancer	2408	811	168	chrI:1296465-1296965	putative_enhancer	enhancer	2492	509	114	19	45065	8.29e-11
chrI:12534344-12534844	putative_enhancer	enhancer	24071	594	110	chrI:13369529-13369960	putative_enhancer	enhancer	25682	1316	285	8	835150	1.69e-08
chrI:1255891-1256391	putative_enhancer	enhancer	2417	518	110	chrI:1257706-1258206	putative_enhancer	enhancer	2420	206	55	21	1815	0.000109093
chrI:1255891-1256391	putative_enhancer	enhancer	2417	518	110	chrI:1271332-1271761	putative_enhancer	enhancer	2445	308	87	14	15405	1.66e-10
chrI:1255891-1256391	putative_enhancer	enhancer	2417	518	110	chrI:1273775-1274275	putative_enhancer	enhancer	2449	707	216	40	17884	8.29e-11
chrI:1255891-1256391	putative_enhancer	enhancer	2417	518	110	chrI:1368647-1369147	putative_enhancer	enhancer	2629	281	79	6	112756	0.00106506
chrI:12570774-12571274	putative_enhancer	enhancer	24141	631	109	chrI:12572256-12572706	putative_enhancer	enhancer	24144	612	111	30	1457	0.00122733
chrI:12570774-12571274	putative_enhancer	enhancer	24141	631	109	chrI:12576174-12576674	putative_enhancer	enhancer	24152	575	120	16	5400	0.0245282
chrI:1271332-1271761	putative_enhancer	enhancer	2445	308	87	chrI:1273775-1274275	putative_enhancer	enhancer	2449	707	216	23	2479	2.15e-07
chrI:1273775-1274275	putative_enhancer	enhancer	2449	707	216	chrI:1295375-1295875	putative_enhancer	enhancer	2490	379	82	13	21600	7.63e-08
chrI:1273775-1274275	putative_enhancer	enhancer	2449	707	216	chrI:1299917-1300417	putative_enhancer	enhancer	2498	364	99	13	26142	6.13e-09
chrI:1273775-1274275	putative_enhancer	enhancer	2449	707	216	chrI:1315374-1315874	putative_enhancer	enhancer	2527	397	116	8	41599	0.0247851
chrI:1295375-1295875	putative_enhancer	enhancer	2490	379	82	chrI:1296465-1296965	putative_enhancer	enhancer	2492	509	114	43	1090	8.29e-11
chrI:1295375-1295875	putative_enhancer	enhancer	2490	379	82	chrI:1315374-1315874	putative_enhancer	enhancer	2527	397	116	10	19999	0.000471488
chrI:1296465-1296965	putative_enhancer	enhancer	2492	509	114	chrI:1299917-1300417	putative_enhancer	enhancer	2498	364	99	17	3452	0.00155043
chrI:12973054-12973554	putative_enhancer	enhancer	24914	452	87	chrI:13031334-13031834	putative_enhancer	enhancer	25023	658	92	8	58280	0.00212064
chrI:13027255-13027755	putative_enhancer	enhancer	25015	235	62	chrI:13036423-13036923	putative_enhancer	enhancer	25031	827	170	16	9168	2.46e-07
chrI:13031334-13031834	putative_enhancer	enhancer	25023	658	92	chrI:13032488-13032988	putative_enhancer	enhancer	25025	676	106	39	1154	4.56e-05
chrI:13031334-13031834	putative_enhancer	enhancer	25023	658	92	chrI:13036423-13036923	putative_enhancer	enhancer	25031	827	170	31	5089	8.29e-11
chrI:13031334-13031834	putative_enhancer	enhancer	25023	658	92	chrI:13037962-13038462	putative_enhancer	enhancer	25034	256	62	13	6628	0.00223503
chrI:13032488-13032988	putative_enhancer	enhancer	25025	676	106	chrI:13036423-13036923	putative_enhancer	enhancer	25031	827	170	36	3935	8.29e-11
chrI:13032488-13032988	putative_enhancer	enhancer	25025	676	106	chrI:13040381-13040881	putative_enhancer	enhancer	25038	842	209	17	7893	0.00246114
chrI:13032488-13032988	putative_enhancer	enhancer	25025	676	106	chrI:13060988-13061488	putative_enhancer	enhancer	25077	440	86	12	28500	1.79e-07
chrI:13032488-13032988	putative_enhancer	enhancer	25025	676	106	chrI:13063974-13064474	putative_enhancer	enhancer	25082	495	132	10	31486	6.93e-05
chrI:13033874-13034374	putative_enhancer	enhancer	25027	212	38	chrI:13063974-13064474	putative_enhancer	enhancer	25082	495	132	7	30100	0.0131122
chrI:13036423-13036923	putative_enhancer	enhancer	25031	827	170	chrI:13040381-13040881	putative_enhancer	enhancer	25038	842	209	63	3958	8.29e-11
chrI:13060988-13061488	putative_enhancer	enhancer	25077	440	86	chrI:13063974-13064474	putative_enhancer	enhancer	25082	495	132	17	2986	0.0395949
chrI:13287103-13287556	putative_enhancer	enhancer	25524	577	112	chrI:13290795-13291295	putative_enhancer	enhancer	25531	764	156	37	3716	8.29e-11
chrI:13290795-13291295	putative_enhancer	enhancer	25531	764	156	chrI:13350913-13351413	putative_enhancer	enhancer	25645	1262	272	15	60118	1.66e-09
chrI:13348949-13349449	putative_enhancer	enhancer	25641	952	158	chrI:13350913-13351413	putative_enhancer	enhancer	25645	1262	272	119	1964	8.29e-11
chrI:13348949-13349449	putative_enhancer	enhancer	25641	952	158	chrI:13367438-13367938	putative_enhancer	enhancer	25678	299	77	15	18489	1.66e-10
chrI:13348949-13349449	putative_enhancer	enhancer	25641	952	158	chrI:13369529-13369960	putative_enhancer	enhancer	25682	1316	285	29	20545	8.29e-11
chrI:13350913-13351413	putative_enhancer	enhancer	25645	1262	272	chrI:13367438-13367938	putative_enhancer	enhancer	25678	299	77	11	16525	0.00132501
chrI:13350913-13351413	putative_enhancer	enhancer	25645	1262	272	chrI:13369529-13369960	putative_enhancer	enhancer	25682	1316	285	33	18581	8.29e-11
chrI:13367438-13367938	putative_enhancer	enhancer	25678	299	77	chrI:13369529-13369960	putative_enhancer	enhancer	25682	1316	285	26	2056	1.67e-05
chrI:13369529-13369960	putative_enhancer	enhancer	25682	1316	285	chrI:13371040-13371447	putative_enhancer	enhancer	25685	444	101	42	1499	3.56e-09
chrI:13369529-13369960	putative_enhancer	enhancer	25682	1316	285	chrI:13371447-13371854	putative_enhancer	enhancer	25686	356	91	32	1906	1.06e-07
chrI:13369529-13369960	putative_enhancer	enhancer	25682	1316	285	chrI:13372335-13372835	putative_enhancer	enhancer	25688	226	69	27	2841	6.63e-10
chrI:13369529-13369960	putative_enhancer	enhancer	25682	1316	285	chrI:13381385-13381885	putative_enhancer	enhancer	25704	357	92	22	11891	8.29e-11
chrI:13369529-13369960	putative_enhancer	enhancer	25682	1316	285	chrI:13490978-13491478	putative_enhancer	enhancer	25916	294	98	7	121484	0.00100997
chrI:14259945-14260426	putative_enhancer	enhancer	27406	210	54	chrI:14261870-14262370	putative_enhancer	enhancer	27410	647	149	24	1935	6.51e-05
chrI:14260426-14260908	putative_enhancer	enhancer	27407	494	107	chrI:14261870-14262370	putative_enhancer	enhancer	27410	647	149	59	1453	8.29e-11
chrI:14261870-14262370	putative_enhancer	enhancer	27410	647	149	chrI:14806435-14806823	putative_enhancer	enhancer	28466	464	144	6	544509	6.26e-05
chrI:14511440-14511940	putative_enhancer	enhancer	27895	253	74	chrI:14532815-14533315	putative_enhancer	enhancer	27934	364	99	10	21375	1.4e-05
chrI:14528608-14529108	putative_enhancer	enhancer	27926	420	133	chrI:14609130-14609630	putative_enhancer	enhancer	28084	339	95	9	80522	7.52e-07
chrI:14532815-14533315	putative_enhancer	enhancer	27934	364	99	chrI:14607321-14607821	putative_enhancer	enhancer	28081	186	50	6	74506	0.00194807
chrI:14604317-14604817	putative_enhancer	enhancer	28075	260	68	chrI:14609130-14609630	putative_enhancer	enhancer	28084	339	95	12	4813	0.0249923
chrI:14604317-14604817	putative_enhancer	enhancer	28075	260	68	chrI:14612587-14613087	putative_enhancer	enhancer	28090	743	222	17	8270	1.23e-06
chrI:14609130-14609630	putative_enhancer	enhancer	28084	339	95	chrI:14612587-14613087	putative_enhancer	enhancer	28090	743	222	41	3457	8.29e-11
chrI:14627927-14628427	putative_enhancer	enhancer	28119	481	185	chrI:14632486-14632895	putative_enhancer	enhancer	28128	224	70	16	4513	1.91e-05
chrI:14806435-14806823	putative_enhancer	enhancer	28466	464	144	chrI:14907846-14908346	putative_enhancer	enhancer	28664	360	109	6	101467	0.00761144
chrI:14845499-14845974	putative_enhancer	enhancer	28544	1206	348	chrI:14899233-14899733	putative_enhancer	enhancer	28648	651	243	13	53747	5.99e-06
chrI:14845499-14845974	putative_enhancer	enhancer	28544	1206	348	chrI:14900497-14900911	putative_enhancer	enhancer	28651	265	94	9	54968	0.000109573
chrI:14845499-14845974	putative_enhancer	enhancer	28544	1206	348	chrI:14922589-14923089	putative_enhancer	enhancer	28692	425	152	8	77103	0.00574191
chrI:14845499-14845974	putative_enhancer	enhancer	28544	1206	348	chrI:14931699-14932091	putative_enhancer	enhancer	28710	282	91	7	86159	0.0167839
chrI:14845499-14845974	putative_enhancer	enhancer	28544	1206	348	chrI:14947999-14948427	putative_enhancer	enhancer	28741	398	115	8	102477	0.000415232
chrI:14899233-14899733	putative_enhancer	enhancer	28648	651	243	chrI:14901557-14902057	putative_enhancer	enhancer	28653	248	85	22	2324	2.08e-05
chrI:14899233-14899733	putative_enhancer	enhancer	28648	651	243	chrI:14947999-14948427	putative_enhancer	enhancer	28741	398	115	7	48730	0.0359898
chrI:14922589-14923089	putative_enhancer	enhancer	28692	425	152	chrI:14924495-14924995	putative_enhancer	enhancer	28696	683	173	59	1906	8.29e-11
chrI:14924495-14924995	putative_enhancer	enhancer	28696	683	173	chrI:14926061-14926561	putative_enhancer	enhancer	28698	296	96	29	1566	4.48e-05
chrI:14924495-14924995	putative_enhancer	enhancer	28696	683	173	chrI:14939814-14940314	putative_enhancer	enhancer	28725	540	176	21	15319	8.29e-11
chrI:14926061-14926561	putative_enhancer	enhancer	28698	296	96	chrI:14939814-14940314	putative_enhancer	enhancer	28725	540	176	11	13753	0.00142028
chrI:1690937-1691328	putative_enhancer	enhancer	3253	934	171	chrI:1836713-1837213	putative_enhancer	enhancer	3532	1837	542	10	145831	5.21e-05
chrI:1691328-1691720	putative_enhancer	enhancer	3254	726	176	chrI:1836713-1837213	putative_enhancer	enhancer	3532	1837	542	8	145439	0.000856669
chrI:1836713-1837213	putative_enhancer	enhancer	3532	1837	542	chrI:1841834-1842297	putative_enhancer	enhancer	3541	463	110	42	5102	8.29e-11
chrI:1836713-1837213	putative_enhancer	enhancer	3532	1837	542	chrI:1911548-1912048	putative_enhancer	enhancer	3676	266	58	7	74835	0.0266338
chrI:1836713-1837213	putative_enhancer	enhancer	3532	1837	542	chrI:2184742-2185242	putative_enhancer	enhancer	4210	322	53	6	348029	0.00222897
chrI:2076789-2077289	putative_enhancer	enhancer	4000	456	132	chrI:2120568-2121068	putative_enhancer	enhancer	4084	263	61	7	43779	0.000447433
chrI:2120568-2121068	putative_enhancer	enhancer	4084	263	61	chrI:2125047-2125547	putative_enhancer	enhancer	4093	381	80	21	4479	8.29e-11
chrI:2179787-2180287	putative_enhancer	enhancer	4200	270	83	chrI:2184742-2185242	putative_enhancer	enhancer	4210	322	53	20	4955	8.29e-11
chrI:230336-230836	putative_enhancer	enhancer	439	154	165	chrI:231791-232291	putative_enhancer	enhancer	441	150	137	66	1455	8.29e-11
chrI:2587475-2587975	putative_enhancer	enhancer	4996	1041	196	chrI:2594171-2594671	putative_enhancer	enhancer	5009	255	55	24	6696	8.29e-11
chrI:2587475-2587975	putative_enhancer	enhancer	4996	1041	196	chrI:2665717-2666217	putative_enhancer	enhancer	5144	472	98	11	78242	1.08e-08
chrI:2587475-2587975	putative_enhancer	enhancer	4996	1041	196	chrI:2863907-2864407	putative_enhancer	enhancer	5517	940	225	7	276432	0.0032269
chrI:2659873-2660289	putative_enhancer	enhancer	5134	302	69	chrI:2665717-2666217	putative_enhancer	enhancer	5144	472	98	12	5886	0.000832118
chrI:2665717-2666217	putative_enhancer	enhancer	5144	472	98	chrI:2668164-2668553	putative_enhancer	enhancer	5148	329	82	15	2391	0.0159562
chrI:2863907-2864407	putative_enhancer	enhancer	5517	940	225	chrI:2869762-2870262	putative_enhancer	enhancer	5528	316	92	19	5855	0.000229505
chrI:298255-298755	putative_enhancer	enhancer	565	543	99	chrI:299597-300097	putative_enhancer	enhancer	567	558	158	53	1342	8.29e-11
chrI:310727-311172	putative_enhancer	enhancer	587	385	112	chrI:315432-315812	putative_enhancer	enhancer	596	245	71	15	4673	3.48e-06
chrI:3246477-3246872	putative_enhancer	enhancer	6261	581	162	chrI:3338199-3338699	putative_enhancer	enhancer	6437	483	84	6	91775	0.0283762
chrI:3334384-3334884	putative_enhancer	enhancer	6430	841	176	chrI:3338199-3338699	putative_enhancer	enhancer	6437	483	84	33	3815	8.29e-11
chrI:3381548-3382048	putative_enhancer	enhancer	6521	330	81	chrI:3382548-3383048	putative_enhancer	enhancer	6523	268	58	36	1000	8.29e-11
chrI:3738082-3738582	putative_enhancer	enhancer	7206	846	149	chrI:3754376-3754876	putative_enhancer	enhancer	7236	691	115	13	16294	0.000117762
chrI:3754376-3754876	putative_enhancer	enhancer	7236	691	115	chrI:4486551-4487035	putative_enhancer	enhancer	8638	737	113	8	732167	3.31e-10
chrI:381406-381821	putative_enhancer	enhancer	727	214	64	chrI:434438-434938	putative_enhancer	enhancer	830	528	112	6	53075	0.0340408
chrI:38811-39311	putative_enhancer	enhancer	73	316	79	chrI:42925-43333	putative_enhancer	enhancer	80	326	80	16	4068	9.69e-06
chrI:3976028-3976528	putative_enhancer	enhancer	7661	290	76	chrI:3988603-3989065	putative_enhancer	enhancer	7685	281	87	9	12556	0.000349841
chrI:4005650-4006033	putative_enhancer	enhancer	7717	819	246	chrI:4007124-4007624	putative_enhancer	enhancer	7719	258	81	22	1533	0.0023216
chrI:4011232-4011732	putative_enhancer	enhancer	7727	152	48	chrI:4030458-4030958	putative_enhancer	enhancer	7761	627	135	8	19226	0.00089292
chrI:4029224-4029724	putative_enhancer	enhancer	7759	572	126	chrI:4030458-4030958	putative_enhancer	enhancer	7761	627	135	32	1234	0.00393508
chrI:4155515-4156015	putative_enhancer	enhancer	8000	300	64	chrI:4157992-4158492	putative_enhancer	enhancer	8005	317	71	23	2477	8.29e-11
chrI:4222968-4223468	putative_enhancer	enhancer	8132	264	81	chrI:4224716-4225216	putative_enhancer	enhancer	8135	525	119	23	1748	0.000620915
chrI:429046-429546	putative_enhancer	enhancer	819	529	111	chrI:434438-434938	putative_enhancer	enhancer	830	528	112	20	5392	2.48e-06
chrI:4298980-4299443	putative_enhancer	enhancer	8281	514	114	chrI:4311516-4312016	putative_enhancer	enhancer	8304	947	193	12	12555	0.00312364
chrI:4299443-4299906	putative_enhancer	enhancer	8282	461	120	chrI:4303752-4304252	putative_enhancer	enhancer	8290	537	103	15	4328	0.000686253
chrI:4299443-4299906	putative_enhancer	enhancer	8282	461	120	chrI:4328791-4329250	putative_enhancer	enhancer	8334	580	140	7	29346	0.0166716
chrI:4311516-4312016	putative_enhancer	enhancer	8304	947	193	chrI:4314258-4314758	putative_enhancer	enhancer	8308	498	94	37	2742	8.29e-11
chrI:4311516-4312016	putative_enhancer	enhancer	8304	947	193	chrI:4322682-4323078	putative_enhancer	enhancer	8323	352	76	12	11114	0.000931988
chrI:4311516-4312016	putative_enhancer	enhancer	8304	947	193	chrI:4332098-4332598	putative_enhancer	enhancer	8340	569	127	15	20582	9.28e-09
chrI:4311516-4312016	putative_enhancer	enhancer	8304	947	193	chrI:4333738-4334238	putative_enhancer	enhancer	8343	576	148	11	22222	0.000428231
chrI:4316228-4316728	putative_enhancer	enhancer	8311	438	84	chrI:4329250-4329709	putative_enhancer	enhancer	8335	390	99	9	13001	0.0106702
chrI:4317008-4317508	putative_enhancer	enhancer	8312	332	77	chrI:4334286-4334786	putative_enhancer	enhancer	8344	533	123	10	17278	1.29e-05
chrI:4322682-4323078	putative_enhancer	enhancer	8323	352	76	chrI:4323846-4324346	putative_enhancer	enhancer	8325	387	63	18	1216	0.0282978
chrI:4323846-4324346	putative_enhancer	enhancer	8325	387	63	chrI:4328791-4329250	putative_enhancer	enhancer	8334	580	140	16	4924	1.32e-06
chrI:4328791-4329250	putative_enhancer	enhancer	8334	580	140	chrI:4334286-4334786	putative_enhancer	enhancer	8344	533	123	14	5516	0.001173
chrI:4332098-4332598	putative_enhancer	enhancer	8340	569	127	chrI:4333738-4334238	putative_enhancer	enhancer	8343	576	148	40	1640	8.29e-11
chrI:4431799-4432299	putative_enhancer	enhancer	8535	346	81	chrI:4433878-4434378	putative_enhancer	enhancer	8538	238	71	16	2079	0.00167601
chrI:4434560-4434972	putative_enhancer	enhancer	8539	348	81	chrI:4436613-4437113	putative_enhancer	enhancer	8543	697	152	19	2097	0.00277376
chrI:4436613-4437113	putative_enhancer	enhancer	8543	697	152	chrI:4437818-4438318	putative_enhancer	enhancer	8545	378	57	38	1205	1.24e-09
chrI:4436613-4437113	putative_enhancer	enhancer	8543	697	152	chrI:4489364-4489864	putative_enhancer	enhancer	8643	622	126	7	52751	0.0270325
chrI:4436613-4437113	putative_enhancer	enhancer	8543	697	152	chrI:4490353-4490853	putative_enhancer	enhancer	8645	1850	424	12	53740	2.12e-05
chrI:4440101-4440601	putative_enhancer	enhancer	8549	412	93	chrI:4486551-4487035	putative_enhancer	enhancer	8638	737	113	7	46442	0.0275272
chrI:4486551-4487035	putative_enhancer	enhancer	8638	737	113	chrI:4489364-4489864	putative_enhancer	enhancer	8643	622	126	30	2821	8.29e-11
chrI:4486551-4487035	putative_enhancer	enhancer	8638	737	113	chrI:4490353-4490853	putative_enhancer	enhancer	8645	1850	424	65	3810	8.29e-11
chrI:4487035-4487519	putative_enhancer	enhancer	8639	288	66	chrI:4490353-4490853	putative_enhancer	enhancer	8645	1850	424	21	3326	0.0377044
chrI:4835159-4835659	putative_enhancer	enhancer	9307	264	65	chrI:4840792-4841292	putative_enhancer	enhancer	9318	293	82	13	5633	0.000152901
chrI:4933242-4933701	putative_enhancer	enhancer	9498	635	157	chrI:4936061-4936561	putative_enhancer	enhancer	9504	806	188	24	2840	0.000838956
chrI:4936061-4936561	putative_enhancer	enhancer	9504	806	188	chrI:4940861-4941247	putative_enhancer	enhancer	9513	269	107	18	4743	1.24e-05
chrI:4936061-4936561	putative_enhancer	enhancer	9504	806	188	chrI:5072128-5072628	putative_enhancer	enhancer	9766	437	86	6	136067	0.0242438
chrI:5014589-5015089	putative_enhancer	enhancer	9655	140	21	chrI:5312690-5313070	putative_enhancer	enhancer	10226	1669	519	6	298041	7.57e-06
chrI:5030937-5031437	putative_enhancer	enhancer	9688	468	110	chrI:5032824-5033255	putative_enhancer	enhancer	9691	232	59	19	1852	2.27e-05
chrI:5030937-5031437	putative_enhancer	enhancer	9688	468	110	chrI:5033255-5033687	putative_enhancer	enhancer	9692	385	84	19	2284	0.00055641
chrI:5030937-5031437	putative_enhancer	enhancer	9688	468	110	chrI:5037271-5037676	putative_enhancer	enhancer	9699	436	121	24	6286	8.29e-11
chrI:5033255-5033687	putative_enhancer	enhancer	9692	385	84	chrI:5037271-5037676	putative_enhancer	enhancer	9699	436	121	23	4002	8.29e-11
chrI:5287162-5287662	putative_enhancer	enhancer	10180	369	104	chrI:5289590-5290090	putative_enhancer	enhancer	10184	212	58	13	2428	0.00272326
chrI:5287162-5287662	putative_enhancer	enhancer	10180	369	104	chrI:5313070-5313450	putative_enhancer	enhancer	10227	2288	721	13	25848	9.29e-06
chrI:5294374-5294874	putative_enhancer	enhancer	10193	697	157	chrI:5311564-5312064	putative_enhancer	enhancer	10224	1654	321	16	17190	1.99e-06
chrI:5294374-5294874	putative_enhancer	enhancer	10193	697	157	chrI:5312690-5313070	putative_enhancer	enhancer	10226	1669	519	16	18256	1.47e-06
chrI:5296308-5296799	putative_enhancer	enhancer	10196	292	64	chrI:5311564-5312064	putative_enhancer	enhancer	10224	1654	321	13	15261	8.94e-06
chrI:5311564-5312064	putative_enhancer	enhancer	10224	1654	321	chrI:5312690-5313070	putative_enhancer	enhancer	10226	1669	519	133	1066	8.29e-11
chrI:5311564-5312064	putative_enhancer	enhancer	10224	1654	321	chrI:5313070-5313450	putative_enhancer	enhancer	10227	2288	721	135	1446	8.29e-11
chrI:5311564-5312064	putative_enhancer	enhancer	10224	1654	321	chrI:5314513-5315013	putative_enhancer	enhancer	10230	926	223	31	2949	5.01e-06
chrI:5311564-5312064	putative_enhancer	enhancer	10224	1654	321	chrI:5315933-5316393	putative_enhancer	enhancer	10233	1519	475	69	4349	8.29e-11
chrI:5312690-5313070	putative_enhancer	enhancer	10226	1669	519	chrI:5314513-5315013	putative_enhancer	enhancer	10230	926	223	34	1883	0.00334121
chrI:5312690-5313070	putative_enhancer	enhancer	10226	1669	519	chrI:5315933-5316393	putative_enhancer	enhancer	10233	1519	475	85	3283	8.29e-11
chrI:5312690-5313070	putative_enhancer	enhancer	10226	1669	519	chrI:6091963-6092438	putative_enhancer	enhancer	11728	554	142	6	779320	4.74e-05
chrI:5313070-5313450	putative_enhancer	enhancer	10227	2288	721	chrI:5314513-5315013	putative_enhancer	enhancer	10230	926	223	82	1503	8.29e-11
chrI:5313070-5313450	putative_enhancer	enhancer	10227	2288	721	chrI:5315933-5316393	putative_enhancer	enhancer	10233	1519	475	121	2903	8.29e-11
chrI:5314513-5315013	putative_enhancer	enhancer	10230	926	223	chrI:5315933-5316393	putative_enhancer	enhancer	10233	1519	475	72	1400	8.29e-11
chrI:5385597-5386097	putative_enhancer	enhancer	10364	284	36	chrI:5388333-5388833	putative_enhancer	enhancer	10369	371	103	20	2736	3.07e-09
chrI:5388333-5388833	putative_enhancer	enhancer	10369	371	103	chrI:5408305-5408805	putative_enhancer	enhancer	10407	435	105	10	19972	1.06e-05
chrI:5586964-5587464	putative_enhancer	enhancer	10752	287	86	chrI:5599350-5599850	putative_enhancer	enhancer	10775	440	113	13	12386	2.24e-05
chrI:5856964-5857454	putative_enhancer	enhancer	11270	308	70	chrI:5865819-5866258	putative_enhancer	enhancer	11288	1202	263	19	8829	3.35e-08
chrI:5879369-5879869	putative_enhancer	enhancer	11315	440	120	chrI:5883748-5884248	putative_enhancer	enhancer	11323	489	119	21	4379	1.18e-08
chrI:5997357-5997857	putative_enhancer	enhancer	11546	746	182	chrI:6000181-6000681	putative_enhancer	enhancer	11551	346	100	32	2824	8.29e-11
chrI:6073413-6073913	putative_enhancer	enhancer	11693	834	163	chrI:6076211-6076650	putative_enhancer	enhancer	11698	532	118	26	2767	1.67e-07
chrI:6073413-6073913	putative_enhancer	enhancer	11693	834	163	chrI:6079525-6080025	putative_enhancer	enhancer	11704	852	206	19	6112	0.000771784
chrI:6170858-6171358	putative_enhancer	enhancer	11877	428	117	chrI:6238311-6238811	putative_enhancer	enhancer	12008	618	156	7	67453	0.00554095
chrI:6203657-6204157	putative_enhancer	enhancer	11941	292	91	chrI:6210717-6211217	putative_enhancer	enhancer	11954	1175	227	14	7060	0.0133311
chrI:6338487-6338987	putative_enhancer	enhancer	12196	519	130	chrI:6340006-6340506	putative_enhancer	enhancer	12199	620	181	28	1519	0.00550555
chrI:6338487-6338987	putative_enhancer	enhancer	12196	519	130	chrI:6372683-6373145	putative_enhancer	enhancer	12263	430	94	8	34177	0.00158963
chrI:6366642-6367142	putative_enhancer	enhancer	12251	291	79	chrI:6389541-6390041	putative_enhancer	enhancer	12295	454	117	7	22899	0.0485121
chrI:6366642-6367142	putative_enhancer	enhancer	12251	291	79	chrI:6418616-6419116	putative_enhancer	enhancer	12351	432	72	6	51974	0.0118859
chrI:6389541-6390041	putative_enhancer	enhancer	12295	454	117	chrI:6418616-6419116	putative_enhancer	enhancer	12351	432	72	7	29075	0.034145
chrI:6498103-6498603	putative_enhancer	enhancer	12502	460	112	chrI:6499518-6499941	putative_enhancer	enhancer	12505	488	119	27	1376	3.73e-09
chrI:6572547-6573047	putative_enhancer	enhancer	12646	660	201	chrI:6577670-6578170	putative_enhancer	enhancer	12656	391	108	22	5123	8.29e-11
chrI:6578204-6578704	putative_enhancer	enhancer	12657	643	178	chrI:6589089-6589589	putative_enhancer	enhancer	12677	333	84	12	10885	0.000151744
chrI:6727646-6728013	putative_enhancer	enhancer	12946	276	86	chrI:6732375-6732837	putative_enhancer	enhancer	12956	368	108	16	4777	1e-07
chrI:6836336-6836779	putative_enhancer	enhancer	13155	306	76	chrI:6838046-6838546	putative_enhancer	enhancer	13159	1024	308	22	1739	0.00394828
chrI:6836779-6837183	putative_enhancer	enhancer	13156	428	116	chrI:6838046-6838546	putative_enhancer	enhancer	13159	1024	308	31	1315	1.52e-07
chrI:7211863-7212363	putative_enhancer	enhancer	13856	298	66	chrI:7213251-7213688	putative_enhancer	enhancer	13858	239	74	19	1356	1.92e-06
chrI:7211863-7212363	putative_enhancer	enhancer	13856	298	66	chrI:7217183-7217683	putative_enhancer	enhancer	13866	722	217	15	5320	0.000192099
chrI:7213688-7214126	putative_enhancer	enhancer	13859	323	102	chrI:7217183-7217683	putative_enhancer	enhancer	13866	722	217	16	3526	0.00787244
chrI:7475475-7475970	putative_enhancer	enhancer	14364	823	230	chrI:7478305-7478805	putative_enhancer	enhancer	14370	269	100	15	2833	0.0134214
chrI:7543340-7543840	putative_enhancer	enhancer	14491	854	229	chrI:7544475-7544898	putative_enhancer	enhancer	14493	415	96	34	1096	6.2e-05
chrI:7562158-7562658	putative_enhancer	enhancer	14526	270	68	chrI:7575248-7575748	putative_enhancer	enhancer	14549	638	171	10	13090	0.000463437
chrI:7563764-7564264	putative_enhancer	enhancer	14528	406	112	chrI:7575248-7575748	putative_enhancer	enhancer	14549	638	171	11	11484	0.00051668
chrI:7609395-7609895	putative_enhancer	enhancer	14612	334	102	chrI:7658621-7659107	putative_enhancer	enhancer	14710	803	206	7	49219	0.00625286
chrI:8011290-8011790	putative_enhancer	enhancer	15383	825	155	chrI:8013241-8013741	putative_enhancer	enhancer	15387	502	122	40	1951	8.29e-11
chrI:8011290-8011790	putative_enhancer	enhancer	15383	825	155	chrI:8018907-8019407	putative_enhancer	enhancer	15397	816	192	18	7617	0.00129733
chrI:8018907-8019407	putative_enhancer	enhancer	15397	816	192	chrI:8057599-8058099	putative_enhancer	enhancer	15471	483	73	8	38692	0.0384037
chrI:8101595-8102095	putative_enhancer	enhancer	15558	973	161	chrI:8102885-8103385	putative_enhancer	enhancer	15560	489	113	47	1290	2.49e-10
chrI:8563396-8563896	putative_enhancer	enhancer	16447	338	83	chrI:8567838-8568338	putative_enhancer	enhancer	16455	371	78	15	4442	0.000988364
chrI:9076103-9076603	putative_enhancer	enhancer	17430	1048	296	chrI:9168465-9168965	putative_enhancer	enhancer	17604	1098	273	8	92362	0.0392672
chrI:9113831-9114331	putative_enhancer	enhancer	17500	928	265	chrI:9115488-9115980	putative_enhancer	enhancer	17503	581	142	28	1653	0.00180177
chrI:9113831-9114331	putative_enhancer	enhancer	17500	928	265	chrI:9115980-9116479	putative_enhancer	enhancer	17504	585	162	27	2148	0.00302035
chrI:9131769-9132232	putative_enhancer	enhancer	17535	935	174	chrI:9145387-9145867	putative_enhancer	enhancer	17561	578	140	20	13627	8.29e-11
chrI:9145387-9145867	putative_enhancer	enhancer	17561	578	140	chrI:9168465-9168965	putative_enhancer	enhancer	17604	1098	273	13	23088	5.84e-05
chrI:9373319-9373722	putative_enhancer	enhancer	17992	392	171	chrI:9383622-9384122	putative_enhancer	enhancer	18011	1159	326	11	10352	0.00401387
chrI:9382657-9383066	putative_enhancer	enhancer	18009	909	308	chrI:9383622-9384122	putative_enhancer	enhancer	18011	1159	326	43	1011	5.67e-06
chrI:9383622-9384122	putative_enhancer	enhancer	18011	1159	326	chrI:9385826-9386326	putative_enhancer	enhancer	18015	757	201	50	2204	8.29e-11
chrI:9424474-9424931	putative_enhancer	enhancer	18088	638	242	chrI:9430481-9430981	putative_enhancer	enhancer	18099	862	241	18	6029	0.00062241
chrI:9424931-9425388	putative_enhancer	enhancer	18089	321	130	chrI:9430481-9430981	putative_enhancer	enhancer	18099	862	241	12	5572	0.0307681
chrI:9428619-9429119	putative_enhancer	enhancer	18096	419	82	chrI:9430481-9430981	putative_enhancer	enhancer	18099	862	241	22	1862	0.000604647
chrI:9429283-9429783	putative_enhancer	enhancer	18097	455	125	chrI:9430481-9430981	putative_enhancer	enhancer	18099	862	241	35	1198	1.02e-06
chrI:9725172-9725672	putative_enhancer	enhancer	18658	905	231	chrI:9733995-9734495	putative_enhancer	enhancer	18673	492	106	14	8823	8.42e-05
chrI:9727641-9728062	putative_enhancer	enhancer	18662	275	46	chrI:9738321-9738821	putative_enhancer	enhancer	18681	527	82	11	10720	2.43e-06
chrI:9733995-9734495	putative_enhancer	enhancer	18673	492	106	chrI:9739367-9739867	putative_enhancer	enhancer	18683	494	117	12	5372	0.0212614
chrI:9735411-9735911	putative_enhancer	enhancer	18676	321	92	chrI:9738321-9738821	putative_enhancer	enhancer	18681	527	82	15	2910	0.0022688
chrI:979372-979872	putative_enhancer	enhancer	1886	320	57	chrI:999035-999535	putative_enhancer	enhancer	1921	1300	255	12	19663	0.000100239
chrI:9840802-9841302	putative_enhancer	enhancer	18872	411	82	chrI:9842259-9842759	putative_enhancer	enhancer	18874	621	126	30	1457	4.97e-10
chrI:9842259-9842759	putative_enhancer	enhancer	18874	621	126	chrI:9858635-9859135	putative_enhancer	enhancer	18907	746	147	12	16376	2.66e-05
chrII:10217712-10218112	putative_enhancer	enhancer	19573	209	45	chrII:10221497-10221997	putative_enhancer	enhancer	19580	340	76	12	3835	0.00351798
chrII:10231786-10232286	putative_enhancer	enhancer	19600	297	57	chrII:9974082-9974536	putative_enhancer	enhancer	19113	345	68	6	257727	7.59e-06
chrII:10384567-10385001	putative_enhancer	enhancer	19896	1256	240	chrII:10390276-10390776	putative_enhancer	enhancer	19907	1091	186	36	5742	8.23e-11
chrII:10390276-10390776	putative_enhancer	enhancer	19907	1091	186	chrII:10447279-10447618	putative_enhancer	enhancer	20020	724	122	8	56922	0.0103002
chrII:10390276-10390776	putative_enhancer	enhancer	19907	1091	186	chrII:10501507-10502007	putative_enhancer	enhancer	20125	1491	350	8	111231	0.00634516
chrII:10501507-10502007	putative_enhancer	enhancer	20125	1491	350	chrII:10504557-10504986	putative_enhancer	enhancer	20130	799	201	37	3014	1e-08
chrII:10504557-10504986	putative_enhancer	enhancer	20130	799	201	chrII:10524303-10524803	putative_enhancer	enhancer	20166	178	51	7	19782	0.0142634
chrII:10546511-10547011	putative_enhancer	enhancer	20208	387	117	chrII:10547663-10548104	putative_enhancer	enhancer	20210	468	146	17	1122	0.0483916
chrII:10548104-10548546	putative_enhancer	enhancer	20211	379	108	chrII:10549191-10549672	putative_enhancer	enhancer	20213	964	316	21	1106	0.0247312
chrII:10548104-10548546	putative_enhancer	enhancer	20211	379	108	chrII:10551933-10552342	putative_enhancer	enhancer	20219	1524	473	17	3812	0.000583925
chrII:10549191-10549672	putative_enhancer	enhancer	20213	964	316	chrII:10550665-10551067	putative_enhancer	enhancer	20216	285	111	20	1435	3.2e-05
chrII:10549191-10549672	putative_enhancer	enhancer	20213	964	316	chrII:10551067-10551470	putative_enhancer	enhancer	20217	286	97	29	1837	8.23e-11
chrII:10549191-10549672	putative_enhancer	enhancer	20213	964	316	chrII:10551511-10551933	putative_enhancer	enhancer	20218	476	168	23	2291	1.32e-09
chrII:10549191-10549672	putative_enhancer	enhancer	20213	964	316	chrII:10551933-10552342	putative_enhancer	enhancer	20219	1524	473	57	2706	8.23e-11
chrII:10549191-10549672	putative_enhancer	enhancer	20213	964	316	chrII:10552342-10552744	putative_enhancer	enhancer	20220	472	150	19	3112	1.71e-06
chrII:10549191-10549672	putative_enhancer	enhancer	20213	964	316	chrII:10557147-10557647	putative_enhancer	enhancer	20230	876	219	14	7966	0.000951174
chrII:10550187-10550607	putative_enhancer	enhancer	20215	522	188	chrII:10551933-10552342	putative_enhancer	enhancer	20219	1524	473	35	1740	1.07e-08
chrII:10551933-10552342	putative_enhancer	enhancer	20219	1524	473	chrII:10553208-10553652	putative_enhancer	enhancer	20222	410	136	25	1293	0.0245459
chrII:10551933-10552342	putative_enhancer	enhancer	20219	1524	473	chrII:10553652-10553989	putative_enhancer	enhancer	20223	206	65	17	1683	0.00853212
chrII:10551933-10552342	putative_enhancer	enhancer	20219	1524	473	chrII:10555765-10556167	putative_enhancer	enhancer	20228	586	206	21	3829	6.11e-06
chrII:10551933-10552342	putative_enhancer	enhancer	20219	1524	473	chrII:10557147-10557647	putative_enhancer	enhancer	20230	876	219	31	5260	8.23e-11
chrII:10551933-10552342	putative_enhancer	enhancer	20219	1524	473	chrII:10558744-10559114	putative_enhancer	enhancer	20233	445	109	14	6792	0.00789923
chrII:10555765-10556167	putative_enhancer	enhancer	20228	586	206	chrII:10557147-10557647	putative_enhancer	enhancer	20230	876	219	31	1431	9.87e-10
chrII:10557147-10557647	putative_enhancer	enhancer	20230	876	219	chrII:10559456-10559809	putative_enhancer	enhancer	20235	365	97	17	2235	0.0106023
chrII:10626973-10627473	putative_enhancer	enhancer	20366	508	86	chrII:10628180-10628680	putative_enhancer	enhancer	20368	220	46	22	1207	0.00575866
chrII:10626973-10627473	putative_enhancer	enhancer	20366	508	86	chrII:10630810-10631310	putative_enhancer	enhancer	20373	276	47	15	3837	0.00271641
chrII:10744715-10745215	putative_enhancer	enhancer	20591	410	153	chrII:10761648-10762148	putative_enhancer	enhancer	20623	251	76	9	16933	0.0167912
chrII:11150839-11151339	putative_enhancer	enhancer	21356	498	107	chrII:11152980-11153480	putative_enhancer	enhancer	21360	314	61	21	2141	1.69e-08
chrII:11150839-11151339	putative_enhancer	enhancer	21356	498	107	chrII:11156062-11156477	putative_enhancer	enhancer	21365	205	43	12	5180	0.00192122
chrII:11202556-11203036	putative_enhancer	enhancer	21451	249	57	chrII:11205674-11206174	putative_enhancer	enhancer	21456	276	75	12	3128	0.0171277
chrII:1135093-1135531	putative_enhancer	enhancer	2187	351	121	chrII:1208574-1209074	putative_enhancer	enhancer	2323	348	117	8	73512	2.21e-05
chrII:11371760-11372260	putative_enhancer	enhancer	21777	232	58	chrII:11414070-11414570	putative_enhancer	enhancer	21856	397	95	6	42310	0.00786417
chrII:11376625-11377125	putative_enhancer	enhancer	21786	582	125	chrII:11414070-11414570	putative_enhancer	enhancer	21856	397	95	8	37445	0.00168854
chrII:1138562-1139062	putative_enhancer	enhancer	2193	376	66	chrII:1141692-1142138	putative_enhancer	enhancer	2198	320	70	15	3103	0.00645054
chrII:1138562-1139062	putative_enhancer	enhancer	2193	376	66	chrII:1143200-1143700	putative_enhancer	enhancer	2201	392	108	18	4638	9e-07
chrII:11619006-11619506	putative_enhancer	enhancer	22243	1197	338	chrII:11646708-11647208	putative_enhancer	enhancer	22293	244	85	8	27702	0.0103867
chrII:11620542-11621042	putative_enhancer	enhancer	22245	641	163	chrII:11631355-11631855	putative_enhancer	enhancer	22266	423	112	12	10813	9.67e-05
chrII:11836426-11836926	putative_enhancer	enhancer	22653	440	84	chrII:11849419-11849919	putative_enhancer	enhancer	22677	352	78	14	12993	1.06e-08
chrII:11843389-11843857	putative_enhancer	enhancer	22665	357	80	chrII:11849419-11849919	putative_enhancer	enhancer	22677	352	78	10	6046	0.0315291
chrII:11843389-11843857	putative_enhancer	enhancer	22665	357	80	chrII:11852061-11852561	putative_enhancer	enhancer	22682	376	70	10	8688	0.00555379
chrII:12162896-12163396	putative_enhancer	enhancer	23272	401	78	chrII:12222418-12222918	putative_enhancer	enhancer	23387	1742	463	16	59522	8.23e-11
chrII:12222418-12222918	putative_enhancer	enhancer	23387	1742	463	chrII:12239326-12239826	putative_enhancer	enhancer	23419	316	70	19	16908	4.11e-10
chrII:12222418-12222918	putative_enhancer	enhancer	23387	1742	463	chrII:12268784-12269284	putative_enhancer	enhancer	23476	282	77	16	46366	8.23e-11
chrII:12222418-12222918	putative_enhancer	enhancer	23387	1742	463	chrII:12350717-12351217	putative_enhancer	enhancer	23633	338	71	7	128299	0.00855762
chrII:12341454-12341954	putative_enhancer	enhancer	23619	232	46	chrII:12350717-12351217	putative_enhancer	enhancer	23633	338	71	10	9263	0.00083587
chrII:1240417-1240917	putative_enhancer	enhancer	2382	513	136	chrII:1244430-1244930	putative_enhancer	enhancer	2389	531	156	22	4013	5.34e-09
chrII:12659857-12660357	putative_enhancer	enhancer	24228	454	116	chrII:12800024-12800524	putative_enhancer	enhancer	24498	498	91	7	140167	0.000110679
chrII:12939017-12939517	putative_enhancer	enhancer	24769	507	69	chrII:13006128-13006628	putative_enhancer	enhancer	24897	497	73	6	67111	0.0340123
chrII:12953219-12953719	putative_enhancer	enhancer	24795	711	101	chrII:13013883-13014383	putative_enhancer	enhancer	24913	529	125	10	60664	1.13e-06
chrII:12993909-12994409	putative_enhancer	enhancer	24875	326	84	chrII:13025905-13026405	putative_enhancer	enhancer	24935	759	111	7	31996	0.0353009
chrII:13025905-13026405	putative_enhancer	enhancer	24935	759	111	chrII:13029035-13029501	putative_enhancer	enhancer	24940	815	161	33	3113	8.23e-11
chrII:13025905-13026405	putative_enhancer	enhancer	24935	759	111	chrII:13029931-13030395	putative_enhancer	enhancer	24942	515	136	16	4008	0.0458326
chrII:13053181-13053681	putative_enhancer	enhancer	24985	251	55	chrII:13107313-13107813	putative_enhancer	enhancer	25087	457	93	7	54132	0.000468929
chrII:13167752-13168168	putative_enhancer	enhancer	25204	172	36	chrII:13170612-13171112	putative_enhancer	enhancer	25210	328	75	13	2902	0.00524885
chrII:13292769-13293269	putative_enhancer	enhancer	25448	471	89	chrII:13294477-13294977	putative_enhancer	enhancer	25451	328	73	18	1708	0.0234343
chrII:13292769-13293269	putative_enhancer	enhancer	25448	471	89	chrII:13297175-13297675	putative_enhancer	enhancer	25456	393	73	13	4406	0.0278059
chrII:13464948-13465331	putative_enhancer	enhancer	25786	447	90	chrII:13469058-13469528	putative_enhancer	enhancer	25793	1242	233	42	4154	8.23e-11
chrII:13465331-13465694	putative_enhancer	enhancer	25787	602	127	chrII:13467739-13468239	putative_enhancer	enhancer	25791	562	134	33	2477	8.23e-11
chrII:13465331-13465694	putative_enhancer	enhancer	25787	602	127	chrII:13469058-13469528	putative_enhancer	enhancer	25793	1242	233	51	3781	8.23e-11
chrII:13467739-13468239	putative_enhancer	enhancer	25791	562	134	chrII:13469058-13469528	putative_enhancer	enhancer	25793	1242	233	65	1304	8.23e-11
chrII:13675504-13675953	putative_enhancer	enhancer	26192	284	71	chrII:13678262-13678701	putative_enhancer	enhancer	26197	351	106	16	2753	5.76e-07
chrII:13757327-13757827	putative_enhancer	enhancer	26349	301	71	chrII:13809899-13810399	putative_enhancer	enhancer	26449	340	108	6	52572	0.0183378
chrII:13809899-13810399	putative_enhancer	enhancer	26449	340	108	chrII:13814986-13815486	putative_enhancer	enhancer	26458	206	59	12	5087	0.000928936
chrII:13953992-13954492	putative_enhancer	enhancer	26725	536	71	chrII:13956438-13956938	putative_enhancer	enhancer	26729	415	59	29	2446	8.23e-11
chrII:13973388-13973888	putative_enhancer	enhancer	26761	551	109	chrII:14010797-14011186	putative_enhancer	enhancer	26831	346	58	7	37353	0.00776706
chrII:13973388-13973888	putative_enhancer	enhancer	26761	551	109	chrII:14049000-14049500	putative_enhancer	enhancer	26902	1308	221	8	75612	0.000715686
chrII:14010797-14011186	putative_enhancer	enhancer	26831	346	58	chrII:14043133-14043602	putative_enhancer	enhancer	26890	472	93	7	32376	0.00217307
chrII:14036582-14037082	putative_enhancer	enhancer	26879	413	121	chrII:14044154-14044594	putative_enhancer	enhancer	26892	1041	239	20	7542	2.47e-10
chrII:14038186-14038686	putative_enhancer	enhancer	26882	922	163	chrII:14043133-14043602	putative_enhancer	enhancer	26890	472	93	19	4931	6.4e-07
chrII:14038186-14038686	putative_enhancer	enhancer	26882	922	163	chrII:14044154-14044594	putative_enhancer	enhancer	26892	1041	239	23	5938	1.18e-07
chrII:14038186-14038686	putative_enhancer	enhancer	26882	922	163	chrII:14045065-14045462	putative_enhancer	enhancer	26894	334	74	12	6827	0.000982642
chrII:14038186-14038686	putative_enhancer	enhancer	26882	922	163	chrII:14049000-14049500	putative_enhancer	enhancer	26902	1308	221	36	10814	8.23e-11
chrII:14042665-14043133	putative_enhancer	enhancer	26889	499	103	chrII:14049000-14049500	putative_enhancer	enhancer	26902	1308	221	30	6351	8.23e-11
chrII:14043133-14043602	putative_enhancer	enhancer	26890	472	93	chrII:14044154-14044594	putative_enhancer	enhancer	26892	1041	239	46	1007	8.23e-11
chrII:14044154-14044594	putative_enhancer	enhancer	26892	1041	239	chrII:14049000-14049500	putative_enhancer	enhancer	26902	1308	221	48	4876	8.23e-11
chrII:14045065-14045462	putative_enhancer	enhancer	26894	334	74	chrII:14049000-14049500	putative_enhancer	enhancer	26902	1308	221	20	3987	1.02e-07
chrII:14437011-14437479	putative_enhancer	enhancer	27647	259	66	chrII:14480618-14481118	putative_enhancer	enhancer	27732	389	102	7	43623	0.000544455
chrII:14619958-14620359	putative_enhancer	enhancer	27999	306	57	chrII:14664944-14665444	putative_enhancer	enhancer	28085	718	168	9	45036	1.72e-05
chrII:14643687-14644187	putative_enhancer	enhancer	28043	287	76	chrII:14664944-14665444	putative_enhancer	enhancer	28085	718	168	10	21257	0.000169027
chrII:14643687-14644187	putative_enhancer	enhancer	28043	287	76	chrII:14704138-14704594	putative_enhancer	enhancer	28159	373	96	9	60429	2.5e-08
chrII:14664944-14665444	putative_enhancer	enhancer	28085	718	168	chrII:14670047-14670547	putative_enhancer	enhancer	28094	420	106	22	5103	4.37e-08
chrII:14664944-14665444	putative_enhancer	enhancer	28085	718	168	chrII:14673519-14674019	putative_enhancer	enhancer	28100	549	120	20	8575	1.2e-08
chrII:14664944-14665444	putative_enhancer	enhancer	28085	718	168	chrII:14704138-14704594	putative_enhancer	enhancer	28159	373	96	9	39172	0.00025697
chrII:14670047-14670547	putative_enhancer	enhancer	28094	420	106	chrII:14825329-14825829	putative_enhancer	enhancer	28391	447	107	7	155282	7.92e-06
chrII:14670892-14671392	putative_enhancer	enhancer	28095	200	58	chrII:14704138-14704594	putative_enhancer	enhancer	28159	373	96	6	33224	0.0136854
chrII:14672893-14673286	putative_enhancer	enhancer	28099	246	42	chrII:14704138-14704594	putative_enhancer	enhancer	28159	373	96	9	31277	6.21e-07
chrII:14673519-14674019	putative_enhancer	enhancer	28100	549	120	chrII:15262974-15263474	putative_enhancer	enhancer	29227	1471	471	6	589455	0.00053362
chrII:14731190-14731690	putative_enhancer	enhancer	28211	262	50	chrII:14825329-14825829	putative_enhancer	enhancer	28391	447	107	9	94139	1.97e-09
chrII:14733899-14734312	putative_enhancer	enhancer	28216	318	68	chrII:15262974-15263474	putative_enhancer	enhancer	29227	1471	471	7	529119	2.11e-06
chrII:14801200-14801627	putative_enhancer	enhancer	28348	210	57	chrII:14811412-14811912	putative_enhancer	enhancer	28367	833	226	11	10249	6.93e-05
chrII:14811412-14811912	putative_enhancer	enhancer	28367	833	226	chrII:14819109-14819565	putative_enhancer	enhancer	28381	447	137	19	7675	3.54e-09
chrII:14811412-14811912	putative_enhancer	enhancer	28367	833	226	chrII:14820356-14820856	putative_enhancer	enhancer	28383	408	134	22	8944	8.23e-11
chrII:14811412-14811912	putative_enhancer	enhancer	28367	833	226	chrII:14822258-14822758	putative_enhancer	enhancer	28386	1105	271	64	10846	8.23e-11
chrII:14811412-14811912	putative_enhancer	enhancer	28367	833	226	chrII:14825329-14825829	putative_enhancer	enhancer	28391	447	107	14	13917	1.29e-06
chrII:14819109-14819565	putative_enhancer	enhancer	28381	447	137	chrII:14820356-14820856	putative_enhancer	enhancer	28383	408	134	23	1269	0.0296385
chrII:14819109-14819565	putative_enhancer	enhancer	28381	447	137	chrII:14822258-14822758	putative_enhancer	enhancer	28386	1105	271	30	3171	2.44e-08
chrII:14820356-14820856	putative_enhancer	enhancer	28383	408	134	chrII:14822258-14822758	putative_enhancer	enhancer	28386	1105	271	34	1902	2.89e-06
chrII:14822258-14822758	putative_enhancer	enhancer	28386	1105	271	chrII:14825329-14825829	putative_enhancer	enhancer	28391	447	107	36	3071	8.23e-11
chrII:14964761-14965261	putative_enhancer	enhancer	28655	287	63	chrII:15262974-15263474	putative_enhancer	enhancer	29227	1471	471	7	298213	4.77e-05
chrII:15074628-15075128	putative_enhancer	enhancer	28866	364	96	chrII:15111228-15111728	putative_enhancer	enhancer	28938	487	173	25	36600	8.23e-11
chrII:15111228-15111728	putative_enhancer	enhancer	28938	487	173	chrII:15262974-15263474	putative_enhancer	enhancer	29227	1471	471	8	151746	0.000108124
chrII:15197378-15197878	putative_enhancer	enhancer	29104	459	149	chrII:15207486-15207965	putative_enhancer	enhancer	29123	273	73	11	10097	3.59e-05
chrII:15197378-15197878	putative_enhancer	enhancer	29104	459	149	chrII:15213854-15214354	putative_enhancer	enhancer	29134	408	141	21	16476	8.23e-11
chrII:15203345-15203845	putative_enhancer	enhancer	29115	498	150	chrII:15212604-15212989	putative_enhancer	enhancer	29132	340	105	10	9201	0.00776557
chrII:15203345-15203845	putative_enhancer	enhancer	29115	498	150	chrII:15213854-15214354	putative_enhancer	enhancer	29134	408	141	12	10509	0.000114357
chrII:15203345-15203845	putative_enhancer	enhancer	29115	498	150	chrII:15262974-15263474	putative_enhancer	enhancer	29227	1471	471	12	59629	1.12e-07
chrII:15206026-15206526	putative_enhancer	enhancer	29120	315	125	chrII:15262974-15263474	putative_enhancer	enhancer	29227	1471	471	7	56948	0.0303343
chrII:15212604-15212989	putative_enhancer	enhancer	29132	340	105	chrII:15262974-15263474	putative_enhancer	enhancer	29227	1471	471	8	50428	0.00431095
chrII:15213854-15214354	putative_enhancer	enhancer	29134	408	141	chrII:15215682-15216182	putative_enhancer	enhancer	29137	250	99	20	1828	1.26e-05
chrII:15213854-15214354	putative_enhancer	enhancer	29134	408	141	chrII:15262974-15263474	putative_enhancer	enhancer	29227	1471	471	9	49120	0.00121184
chrII:15218397-15218889	putative_enhancer	enhancer	29142	186	61	chrII:15262974-15263474	putative_enhancer	enhancer	29227	1471	471	9	44581	1.99e-05
chrII:15258543-15259043	putative_enhancer	enhancer	29218	726	217	chrII:15262974-15263474	putative_enhancer	enhancer	29227	1471	471	57	4431	8.23e-11
chrII:15260448-15260937	putative_enhancer	enhancer	29222	391	110	chrII:15262974-15263474	putative_enhancer	enhancer	29227	1471	471	60	2532	8.23e-11
chrII:15262974-15263474	putative_enhancer	enhancer	29227	1471	471	chrII:15264496-15264996	putative_enhancer	enhancer	29230	209	79	27	1522	0.0213388
chrII:15262974-15263474	putative_enhancer	enhancer	29227	1471	471	chrII:15265831-15266206	putative_enhancer	enhancer	29232	254	112	36	2794	8.23e-11
chrII:15262974-15263474	putative_enhancer	enhancer	29227	1471	471	chrII:15266467-15266852	putative_enhancer	enhancer	29234	363	113	34	3435	8.23e-11
chrII:2435501-2436001	putative_enhancer	enhancer	4694	293	70	chrII:2436732-2437232	putative_enhancer	enhancer	4696	384	62	26	1231	0.00132061
chrII:2436732-2437232	putative_enhancer	enhancer	4696	384	62	chrII:2441645-2442145	putative_enhancer	enhancer	4704	290	60	20	4913	1.48e-09
chrII:2726785-2727285	putative_enhancer	enhancer	5263	206	63	chrII:2728371-2728791	putative_enhancer	enhancer	5266	255	63	16	1546	0.0320772
chrII:2800774-2801243	putative_enhancer	enhancer	5406	1232	225	chrII:2802786-2803184	putative_enhancer	enhancer	5411	483	94	74	1977	8.23e-11
chrII:2800774-2801243	putative_enhancer	enhancer	5406	1232	225	chrII:2804173-2804673	putative_enhancer	enhancer	5414	328	105	22	3415	0.012043
chrII:2800774-2801243	putative_enhancer	enhancer	5406	1232	225	chrII:2805502-2806002	putative_enhancer	enhancer	5416	293	48	31	4744	8.23e-11
chrII:2800774-2801243	putative_enhancer	enhancer	5406	1232	225	chrII:2832057-2832522	putative_enhancer	enhancer	5466	511	115	15	31281	1.97e-07
chrII:2800774-2801243	putative_enhancer	enhancer	5406	1232	225	chrII:2856101-2856601	putative_enhancer	enhancer	5512	425	59	11	55343	6.12e-06
chrII:2800774-2801243	putative_enhancer	enhancer	5406	1232	225	chrII:2973866-2974366	putative_enhancer	enhancer	5744	1687	416	18	173108	8.23e-11
chrII:2800774-2801243	putative_enhancer	enhancer	5406	1232	225	chrII:2975488-2975892	putative_enhancer	enhancer	5747	338	71	6	174682	0.0238732
chrII:2832057-2832522	putative_enhancer	enhancer	5466	511	115	chrII:2854729-2855229	putative_enhancer	enhancer	5510	746	173	12	22690	0.000167288
chrII:2854729-2855229	putative_enhancer	enhancer	5510	746	173	chrII:2856101-2856601	putative_enhancer	enhancer	5512	425	59	56	1372	8.23e-11
chrII:2854729-2855229	putative_enhancer	enhancer	5510	746	173	chrII:2973866-2974366	putative_enhancer	enhancer	5744	1687	416	12	119137	1.03e-06
chrII:2973866-2974366	putative_enhancer	enhancer	5744	1687	416	chrII:2975488-2975892	putative_enhancer	enhancer	5747	338	71	43	1574	7.41e-06
chrII:2973866-2974366	putative_enhancer	enhancer	5744	1687	416	chrII:2976558-2977058	putative_enhancer	enhancer	5749	286	103	39	2692	1.56e-08
chrII:3437006-3437506	putative_enhancer	enhancer	6637	439	75	chrII:3438447-3438947	putative_enhancer	enhancer	6640	251	51	27	1441	2.68e-07
chrII:3897031-3897408	putative_enhancer	enhancer	7532	540	115	chrII:3929395-3929895	putative_enhancer	enhancer	7595	898	152	18	32426	8.23e-11
chrII:3897680-3898094	putative_enhancer	enhancer	7533	603	114	chrII:4089217-4089717	putative_enhancer	enhancer	7901	942	136	7	191580	0.00306832
chrII:4067867-4068367	putative_enhancer	enhancer	7859	120	17	chrII:4154666-4155166	putative_enhancer	enhancer	8021	269	77	6	86799	0.000134666
chrII:4087462-4087962	putative_enhancer	enhancer	7898	329	63	chrII:4089217-4089717	putative_enhancer	enhancer	7901	942	136	42	1755	8.23e-11
chrII:4089217-4089717	putative_enhancer	enhancer	7901	942	136	chrII:4194079-4194579	putative_enhancer	enhancer	8098	496	125	9	104862	7.52e-06
chrII:4194079-4194579	putative_enhancer	enhancer	8098	496	125	chrII:4201621-4202121	putative_enhancer	enhancer	8112	321	47	25	7542	8.23e-11
chrII:4194079-4194579	putative_enhancer	enhancer	8098	496	125	chrII:4203764-4204264	putative_enhancer	enhancer	8116	260	38	17	9685	8.23e-11
chrII:4201621-4202121	putative_enhancer	enhancer	8112	321	47	chrII:4203764-4204264	putative_enhancer	enhancer	8116	260	38	21	2143	1.01e-06
chrII:4510602-4511102	putative_enhancer	enhancer	8709	271	58	chrII:4556505-4556970	putative_enhancer	enhancer	8798	455	80	7	45885	0.011665
chrII:4908173-4908647	putative_enhancer	enhancer	9474	1107	245	chrII:5336835-5337299	putative_enhancer	enhancer	10285	1508	393	6	428657	0.0102218
chrII:5047228-5047728	putative_enhancer	enhancer	9732	793	167	chrII:5049078-5049454	putative_enhancer	enhancer	9735	377	86	24	1788	8.97e-05
chrII:5217957-5218457	putative_enhancer	enhancer	10062	181	61	chrII:5222741-5223241	putative_enhancer	enhancer	10069	266	75	13	4784	1.51e-06
chrII:5281070-5281556	putative_enhancer	enhancer	10180	628	136	chrII:5282161-5282661	putative_enhancer	enhancer	10182	380	101	26	1098	0.00157048
chrII:5281556-5282043	putative_enhancer	enhancer	10181	297	71	chrII:5336835-5337299	putative_enhancer	enhancer	10285	1508	393	7	55268	0.0140937
chrII:5327761-5328226	putative_enhancer	enhancer	10268	191	83	chrII:5335864-5336364	putative_enhancer	enhancer	10283	796	277	9	8121	0.0200522
chrII:5331707-5332132	putative_enhancer	enhancer	10276	531	165	chrII:5332712-5333212	putative_enhancer	enhancer	10278	513	148	28	1043	4.29e-08
chrII:5331707-5332132	putative_enhancer	enhancer	10276	531	165	chrII:5333624-5334122	putative_enhancer	enhancer	10279	475	118	18	1954	0.000549713
chrII:5331707-5332132	putative_enhancer	enhancer	10276	531	165	chrII:5335864-5336364	putative_enhancer	enhancer	10283	796	277	15	4195	0.00897729
chrII:5332712-5333212	putative_enhancer	enhancer	10278	513	148	chrII:5337413-5337913	putative_enhancer	enhancer	10286	666	185	19	4701	1.15e-09
chrII:5336835-5337299	putative_enhancer	enhancer	10285	1508	393	chrII:5901543-5902043	putative_enhancer	enhancer	11353	1832	528	7	564726	0.00175332
chrII:5574808-5575308	putative_enhancer	enhancer	10739	262	69	chrII:5751287-5751787	putative_enhancer	enhancer	11072	348	76	6	176479	2.03e-05
chrII:5748289-5748789	putative_enhancer	enhancer	11067	443	117	chrII:5751287-5751787	putative_enhancer	enhancer	11072	348	76	16	2998	0.00217364
chrII:5898976-5899476	putative_enhancer	enhancer	11348	645	192	chrII:5901543-5902043	putative_enhancer	enhancer	11353	1832	528	48	2567	8.23e-11
chrII:598934-599434	putative_enhancer	enhancer	1145	223	46	chrII:602943-603443	putative_enhancer	enhancer	1152	638	213	14	4009	0.0498167
chrII:601241-601741	putative_enhancer	enhancer	1149	472	130	chrII:602943-603443	putative_enhancer	enhancer	1152	638	213	40	1702	1.64e-10
chrII:601241-601741	putative_enhancer	enhancer	1149	472	130	chrII:604004-604504	putative_enhancer	enhancer	1154	414	146	20	2763	0.00216082
chrII:602943-603443	putative_enhancer	enhancer	1152	638	213	chrII:604004-604504	putative_enhancer	enhancer	1154	414	146	41	1061	5.58e-05
chrII:604004-604504	putative_enhancer	enhancer	1154	414	146	chrII:759725-760203	putative_enhancer	enhancer	1456	451	142	7	155710	0.000147269
chrII:6327239-6327739	putative_enhancer	enhancer	12166	592	126	chrII:6374405-6374878	putative_enhancer	enhancer	12255	420	86	12	47152	1.64e-10
chrII:67580-68073	putative_enhancer	enhancer	128	423	144	chrII:76598-77098	putative_enhancer	enhancer	145	316	104	20	9022	8.23e-11
chrII:6820234-6820734	putative_enhancer	enhancer	13099	699	180	chrII:6842484-6842984	putative_enhancer	enhancer	13139	1301	298	12	22250	9.88e-06
chrII:6820234-6820734	putative_enhancer	enhancer	13099	699	180	chrII:6849246-6849746	putative_enhancer	enhancer	13153	679	205	8	29012	0.00417367
chrII:6822225-6822698	putative_enhancer	enhancer	13102	1022	262	chrII:6826663-6827116	putative_enhancer	enhancer	13109	915	252	19	4428	2.82e-05
chrII:6822225-6822698	putative_enhancer	enhancer	13102	1022	262	chrII:6827326-6827826	putative_enhancer	enhancer	13110	998	283	18	5115	0.00031653
chrII:6822225-6822698	putative_enhancer	enhancer	13102	1022	262	chrII:6829103-6829493	putative_enhancer	enhancer	13113	1113	260	35	6837	8.23e-11
chrII:6822225-6822698	putative_enhancer	enhancer	13102	1022	262	chrII:6831705-6832205	putative_enhancer	enhancer	13119	719	202	11	9494	0.00863056
chrII:6822225-6822698	putative_enhancer	enhancer	13102	1022	262	chrII:6835430-6835930	putative_enhancer	enhancer	13126	834	235	18	13219	8.23e-11
chrII:6822225-6822698	putative_enhancer	enhancer	13102	1022	262	chrII:6836074-6836574	putative_enhancer	enhancer	13127	611	207	16	13863	8.23e-11
chrII:6822225-6822698	putative_enhancer	enhancer	13102	1022	262	chrII:6842484-6842984	putative_enhancer	enhancer	13139	1301	298	12	20273	5.78e-05
chrII:6825087-6825587	putative_enhancer	enhancer	13106	275	108	chrII:6834107-6834497	putative_enhancer	enhancer	13123	479	156	8	8965	0.00435762
chrII:6826663-6827116	putative_enhancer	enhancer	13109	915	252	chrII:6829103-6829493	putative_enhancer	enhancer	13113	1113	260	27	2409	4.42e-07
chrII:6826663-6827116	putative_enhancer	enhancer	13109	915	252	chrII:6831705-6832205	putative_enhancer	enhancer	13119	719	202	13	5066	0.0434762
chrII:6826663-6827116	putative_enhancer	enhancer	13109	915	252	chrII:6834107-6834497	putative_enhancer	enhancer	13123	479	156	11	7413	0.000615575
chrII:6826663-6827116	putative_enhancer	enhancer	13109	915	252	chrII:6842484-6842984	putative_enhancer	enhancer	13139	1301	298	14	15845	6.45e-06
chrII:6826663-6827116	putative_enhancer	enhancer	13109	915	252	chrII:6849246-6849746	putative_enhancer	enhancer	13153	679	205	8	22607	0.0327115
chrII:6827326-6827826	putative_enhancer	enhancer	13110	998	283	chrII:6829103-6829493	putative_enhancer	enhancer	13113	1113	260	38	1722	1.64e-10
chrII:6827326-6827826	putative_enhancer	enhancer	13110	998	283	chrII:6832641-6833141	putative_enhancer	enhancer	13120	619	183	14	5315	0.0129618
chrII:6827326-6827826	putative_enhancer	enhancer	13110	998	283	chrII:6841036-6841536	putative_enhancer	enhancer	13137	647	166	12	13710	0.00019162
chrII:6827326-6827826	putative_enhancer	enhancer	13110	998	283	chrII:6842484-6842984	putative_enhancer	enhancer	13139	1301	298	16	15158	5e-07
chrII:6829103-6829493	putative_enhancer	enhancer	13113	1113	260	chrII:6830820-6831212	putative_enhancer	enhancer	13117	530	165	28	1718	1.07e-09
chrII:6829103-6829493	putative_enhancer	enhancer	13113	1113	260	chrII:6831705-6832205	putative_enhancer	enhancer	13119	719	202	27	2657	1.64e-10
chrII:6829103-6829493	putative_enhancer	enhancer	13113	1113	260	chrII:6834107-6834497	putative_enhancer	enhancer	13123	479	156	12	5004	0.00335434
chrII:6829103-6829493	putative_enhancer	enhancer	13113	1113	260	chrII:6835430-6835930	putative_enhancer	enhancer	13126	834	235	15	6382	0.00140624
chrII:6829103-6829493	putative_enhancer	enhancer	13113	1113	260	chrII:6837080-6837504	putative_enhancer	enhancer	13129	562	151	15	7994	1.64e-06
chrII:6829103-6829493	putative_enhancer	enhancer	13113	1113	260	chrII:6841036-6841536	putative_enhancer	enhancer	13137	647	166	13	11988	1.67e-05
chrII:6829103-6829493	putative_enhancer	enhancer	13113	1113	260	chrII:6842484-6842984	putative_enhancer	enhancer	13139	1301	298	27	13436	8.23e-11
chrII:6829986-6830408	putative_enhancer	enhancer	13115	523	143	chrII:6838909-6839363	putative_enhancer	enhancer	13133	458	155	10	8939	0.000284314
chrII:6831212-6831652	putative_enhancer	enhancer	13118	536	181	chrII:6832641-6833141	putative_enhancer	enhancer	13120	619	183	20	1459	0.00517541
chrII:6831705-6832205	putative_enhancer	enhancer	13119	719	202	chrII:6842484-6842984	putative_enhancer	enhancer	13139	1301	298	20	10779	8.23e-11
chrII:6835430-6835930	putative_enhancer	enhancer	13126	834	235	chrII:6842484-6842984	putative_enhancer	enhancer	13139	1301	298	20	7054	2.76e-07
chrII:6836074-6836574	putative_enhancer	enhancer	13127	611	207	chrII:6849246-6849746	putative_enhancer	enhancer	13153	679	205	9	13172	0.0238815
chrII:6837080-6837504	putative_enhancer	enhancer	13129	562	151	chrII:6848107-6848444	putative_enhancer	enhancer	13150	626	152	9	10983	0.048836
chrII:6841036-6841536	putative_enhancer	enhancer	13137	647	166	chrII:6842484-6842984	putative_enhancer	enhancer	13139	1301	298	39	1448	7.4e-10
chrII:6841036-6841536	putative_enhancer	enhancer	13137	647	166	chrII:6849246-6849746	putative_enhancer	enhancer	13153	679	205	13	8210	8.3e-05
chrII:6842484-6842984	putative_enhancer	enhancer	13139	1301	298	chrII:6848107-6848444	putative_enhancer	enhancer	13150	626	152	21	5541	4.1e-08
chrII:6848107-6848444	putative_enhancer	enhancer	13150	626	152	chrII:6849246-6849746	putative_enhancer	enhancer	13153	679	205	33	1221	1.73e-09
chrII:6936509-6936993	putative_enhancer	enhancer	13321	437	98	chrII:6943309-6943647	putative_enhancer	enhancer	13334	314	100	10	6727	0.00142841
chrII:714316-714816	putative_enhancer	enhancer	1369	262	90	chrII:716500-716966	putative_enhancer	enhancer	1373	250	92	21	2167	9.65e-07
chrII:7674528-7674952	putative_enhancer	enhancer	14733	321	98	chrII:7678300-7678734	putative_enhancer	enhancer	14740	335	74	12	3777	8.64e-06
chrII:7677189-7677689	putative_enhancer	enhancer	14738	360	118	chrII:7678300-7678734	putative_enhancer	enhancer	14740	335	74	15	1078	0.0300157
chrII:7887176-7887676	putative_enhancer	enhancer	15134	663	236	chrII:7927143-7927643	putative_enhancer	enhancer	15211	179	53	7	39967	0.0103253
chrII:7930628-7931128	putative_enhancer	enhancer	15217	460	98	chrII:7950832-7951332	putative_enhancer	enhancer	15254	213	53	8	20204	0.000552631
chrII:8006847-8007347	putative_enhancer	enhancer	15361	307	85	chrII:8016622-8017122	putative_enhancer	enhancer	15380	974	252	12	9775	0.00236638
chrII:8016622-8017122	putative_enhancer	enhancer	15380	974	252	chrII:8127161-8127661	putative_enhancer	enhancer	15588	972	231	10	110539	1.5e-07
chrII:8093984-8094484	putative_enhancer	enhancer	15528	362	80	chrII:8222590-8223090	putative_enhancer	enhancer	15773	823	185	6	128606	0.0176407
chrII:8127161-8127661	putative_enhancer	enhancer	15588	972	231	chrII:8128206-8128642	putative_enhancer	enhancer	15590	608	210	33	1013	0.00174226
chrII:8127161-8127661	putative_enhancer	enhancer	15588	972	231	chrII:8130819-8131194	putative_enhancer	enhancer	15595	417	141	16	3595	0.00387664
chrII:8205361-8205861	putative_enhancer	enhancer	15740	347	108	chrII:8266444-8266944	putative_enhancer	enhancer	15856	330	73	6	61083	0.00173627
chrII:8382795-8383295	putative_enhancer	enhancer	16078	510	95	chrII:8384228-8384728	putative_enhancer	enhancer	16081	368	82	37	1433	8.23e-11
chrII:8382795-8383295	putative_enhancer	enhancer	16078	510	95	chrII:8386768-8387146	putative_enhancer	enhancer	16085	278	61	21	3912	4.11e-10
chrII:8382795-8383295	putative_enhancer	enhancer	16078	510	95	chrII:8388141-8388524	putative_enhancer	enhancer	16088	321	50	20	5287	8.23e-11
chrII:8382795-8383295	putative_enhancer	enhancer	16078	510	95	chrII:8412811-8413311	putative_enhancer	enhancer	16133	373	67	11	30016	5.34e-08
chrII:8650130-8650592	putative_enhancer	enhancer	16581	629	135	chrII:8845863-8846264	putative_enhancer	enhancer	16957	557	118	6	195702	0.00484721
chrII:8675389-8675857	putative_enhancer	enhancer	16630	339	86	chrII:8683587-8683930	putative_enhancer	enhancer	16647	431	80	13	8135	1.66e-05
chrII:8741804-8742267	putative_enhancer	enhancer	16756	577	166	chrII:8751165-8751544	putative_enhancer	enhancer	16775	460	151	11	9319	0.000408592
chrII:9127981-9128481	putative_enhancer	enhancer	17490	867	227	chrII:9130229-9130729	putative_enhancer	enhancer	17494	499	127	28	2248	1.17e-05
chrII:9305412-9305912	putative_enhancer	enhancer	17822	286	92	chrII:9311618-9312118	putative_enhancer	enhancer	17833	169	48	10	6206	0.00297681
chrII:9490467-9490920	putative_enhancer	enhancer	18178	329	74	chrII:9493488-9493903	putative_enhancer	enhancer	18184	284	71	12	3002	0.0330829
chrII:9791086-9791586	putative_enhancer	enhancer	18759	670	101	chrII:9878412-9878854	putative_enhancer	enhancer	18929	290	55	6	87297	0.00304608
chrII:9891681-9892177	putative_enhancer	enhancer	18955	712	133	chrII:9934915-9935405	putative_enhancer	enhancer	19039	372	94	8	43231	0.000712644
chrIII:10170089-10170589	putative_enhancer	enhancer	19473	433	77	chrIII:10179880-10180380	putative_enhancer	enhancer	19492	239	65	12	9791	0.0006834
chrIII:10462942-10463442	putative_enhancer	enhancer	20040	337	90	chrIII:11054687-11055187	putative_enhancer	enhancer	21165	1501	366	6	591745	0.000112442
chrIII:10486256-10486756	putative_enhancer	enhancer	20083	412	93	chrIII:10488856-10489356	putative_enhancer	enhancer	20088	384	60	21	2600	4.28e-05
chrIII:10488856-10489356	putative_enhancer	enhancer	20088	384	60	chrIII:10490160-10490660	putative_enhancer	enhancer	20090	250	55	27	1304	9.31e-08
chrIII:10521502-10522002	putative_enhancer	enhancer	20152	244	73	chrIII:10525814-10526314	putative_enhancer	enhancer	20160	405	82	17	4312	7.61e-05
chrIII:10632551-10633003	putative_enhancer	enhancer	20366	878	251	chrIII:10633885-10634385	putative_enhancer	enhancer	20368	1726	451	105	1358	7.62e-11
chrIII:10632551-10633003	putative_enhancer	enhancer	20366	878	251	chrIII:10651555-10652055	putative_enhancer	enhancer	20400	1090	227	22	19028	7.62e-11
chrIII:10633885-10634385	putative_enhancer	enhancer	20368	1726	451	chrIII:10651555-10652055	putative_enhancer	enhancer	20400	1090	227	35	17670	7.62e-11
chrIII:10633885-10634385	putative_enhancer	enhancer	20368	1726	451	chrIII:10717929-10718429	putative_enhancer	enhancer	20526	436	140	8	84044	0.00077504
chrIII:10633885-10634385	putative_enhancer	enhancer	20368	1726	451	chrIII:11054687-11055187	putative_enhancer	enhancer	21165	1501	366	7	420802	0.00876227
chrIII:10651555-10652055	putative_enhancer	enhancer	20400	1090	227	chrIII:10661011-10661511	putative_enhancer	enhancer	20416	466	118	16	9456	0.00148362
chrIII:10651555-10652055	putative_enhancer	enhancer	20400	1090	227	chrIII:10671736-10672236	putative_enhancer	enhancer	20436	260	78	10	20181	0.0057546
chrIII:10651555-10652055	putative_enhancer	enhancer	20400	1090	227	chrIII:10711138-10711638	putative_enhancer	enhancer	20514	716	152	12	59583	1.55e-06
chrIII:10711138-10711638	putative_enhancer	enhancer	20514	716	152	chrIII:10731251-10731751	putative_enhancer	enhancer	20552	237	68	8	20113	0.0469735
chrIII:11039105-11039605	putative_enhancer	enhancer	21137	358	67	chrIII:11054687-11055187	putative_enhancer	enhancer	21165	1501	366	17	15582	1.41e-06
chrIII:11046383-11046883	putative_enhancer	enhancer	21151	466	80	chrIII:11054687-11055187	putative_enhancer	enhancer	21165	1501	366	27	8304	7.62e-11
chrIII:11050532-11051032	putative_enhancer	enhancer	21157	732	149	chrIII:11054687-11055187	putative_enhancer	enhancer	21165	1501	366	88	4155	7.62e-11
chrIII:11050532-11051032	putative_enhancer	enhancer	21157	732	149	chrIII:11059621-11060121	putative_enhancer	enhancer	21174	368	74	12	9089	0.0137581
chrIII:11054687-11055187	putative_enhancer	enhancer	21165	1501	366	chrIII:11059621-11060121	putative_enhancer	enhancer	21174	368	74	30	4934	7.62e-11
chrIII:11054687-11055187	putative_enhancer	enhancer	21165	1501	366	chrIII:11083877-11084377	putative_enhancer	enhancer	21221	375	69	12	29190	0.000104139
chrIII:11054687-11055187	putative_enhancer	enhancer	21165	1501	366	chrIII:11689182-11689682	putative_enhancer	enhancer	22374	1134	231	6	634495	0.0386567
chrIII:11185345-11185800	putative_enhancer	enhancer	21413	1069	253	chrIII:11187155-11187655	putative_enhancer	enhancer	21416	436	94	43	1833	7.62e-11
chrIII:11185345-11185800	putative_enhancer	enhancer	21413	1069	253	chrIII:11187964-11188408	putative_enhancer	enhancer	21417	361	88	33	2614	7.62e-11
chrIII:11185345-11185800	putative_enhancer	enhancer	21413	1069	253	chrIII:11189874-11190299	putative_enhancer	enhancer	21421	244	44	14	4514	0.0231978
chrIII:11185345-11185800	putative_enhancer	enhancer	21413	1069	253	chrIII:11190299-11190725	putative_enhancer	enhancer	21422	450	81	38	4940	7.62e-11
chrIII:11185345-11185800	putative_enhancer	enhancer	21413	1069	253	chrIII:11193075-11193575	putative_enhancer	enhancer	21427	408	90	19	7753	4.14e-07
chrIII:11185345-11185800	putative_enhancer	enhancer	21413	1069	253	chrIII:11195415-11195892	putative_enhancer	enhancer	21431	451	92	24	10081	7.62e-11
chrIII:11185345-11185800	putative_enhancer	enhancer	21413	1069	253	chrIII:11201950-11202450	putative_enhancer	enhancer	21441	388	98	13	16628	0.000295066
chrIII:11185345-11185800	putative_enhancer	enhancer	21413	1069	253	chrIII:11204684-11205184	putative_enhancer	enhancer	21445	316	58	14	19362	6.85e-08
chrIII:11185345-11185800	putative_enhancer	enhancer	21413	1069	253	chrIII:11738302-11738802	putative_enhancer	enhancer	22470	511	128	8	552980	7.66e-08
chrIII:11185800-11186255	putative_enhancer	enhancer	21414	595	119	chrIII:11189874-11190299	putative_enhancer	enhancer	21421	244	44	13	4059	0.000820217
chrIII:11185800-11186255	putative_enhancer	enhancer	21414	595	119	chrIII:11190299-11190725	putative_enhancer	enhancer	21422	450	81	22	4485	3.05e-10
chrIII:11185800-11186255	putative_enhancer	enhancer	21414	595	119	chrIII:11193075-11193575	putative_enhancer	enhancer	21427	408	90	19	7298	7.62e-11
chrIII:11185800-11186255	putative_enhancer	enhancer	21414	595	119	chrIII:11195415-11195892	putative_enhancer	enhancer	21431	451	92	17	9626	9.14e-10
chrIII:11187155-11187655	putative_enhancer	enhancer	21416	436	94	chrIII:11195415-11195892	putative_enhancer	enhancer	21431	451	92	21	8248	7.62e-11
chrIII:11187964-11188408	putative_enhancer	enhancer	21417	361	88	chrIII:11189874-11190299	putative_enhancer	enhancer	21421	244	44	13	1900	0.0133513
chrIII:11187964-11188408	putative_enhancer	enhancer	21417	361	88	chrIII:11193075-11193575	putative_enhancer	enhancer	21427	408	90	20	5139	7.62e-11
chrIII:11187964-11188408	putative_enhancer	enhancer	21417	361	88	chrIII:11195415-11195892	putative_enhancer	enhancer	21431	451	92	12	7467	5.54e-05
chrIII:11190299-11190725	putative_enhancer	enhancer	21422	450	81	chrIII:11201950-11202450	putative_enhancer	enhancer	21441	388	98	13	11688	7.97e-06
chrIII:11190299-11190725	putative_enhancer	enhancer	21422	450	81	chrIII:11242144-11242630	putative_enhancer	enhancer	21518	260	46	6	51875	0.00882943
chrIII:11193075-11193575	putative_enhancer	enhancer	21427	408	90	chrIII:11195415-11195892	putative_enhancer	enhancer	21431	451	92	26	2328	7.62e-11
chrIII:11355642-11356142	putative_enhancer	enhancer	21733	582	110	chrIII:11357233-11357733	putative_enhancer	enhancer	21736	583	122	47	1591	7.62e-11
chrIII:11355642-11356142	putative_enhancer	enhancer	21733	582	110	chrIII:11378250-11378750	putative_enhancer	enhancer	21774	360	69	11	22608	1.45e-05
chrIII:11357233-11357733	putative_enhancer	enhancer	21736	583	122	chrIII:11371128-11371628	putative_enhancer	enhancer	21761	528	111	13	13895	0.00203385
chrIII:11357233-11357733	putative_enhancer	enhancer	21736	583	122	chrIII:11444574-11444961	putative_enhancer	enhancer	21903	351	66	6	87284	0.0106563
chrIII:11467923-11468342	putative_enhancer	enhancer	21947	681	142	chrIII:11478325-11478704	putative_enhancer	enhancer	21967	307	77	13	10382	0.00102028
chrIII:11558133-11558633	putative_enhancer	enhancer	22121	321	57	chrIII:11559507-11559992	putative_enhancer	enhancer	22123	348	63	21	1366	0.0115914
chrIII:11666647-11667147	putative_enhancer	enhancer	22331	367	83	chrIII:11689182-11689682	putative_enhancer	enhancer	22374	1134	231	17	22535	1.87e-08
chrIII:11689182-11689682	putative_enhancer	enhancer	22374	1134	231	chrIII:11726911-11727350	putative_enhancer	enhancer	22448	356	59	12	37698	3.32e-05
chrIII:11689182-11689682	putative_enhancer	enhancer	22374	1134	231	chrIII:11738302-11738802	putative_enhancer	enhancer	22470	511	128	10	49120	0.0151801
chrIII:11689182-11689682	putative_enhancer	enhancer	22374	1134	231	chrIII:11814154-11814599	putative_enhancer	enhancer	22617	313	56	7	124944	0.00218191
chrIII:11689182-11689682	putative_enhancer	enhancer	22374	1134	231	chrIII:11942568-11943068	putative_enhancer	enhancer	22865	309	103	6	253386	0.00377427
chrIII:11689182-11689682	putative_enhancer	enhancer	22374	1134	231	chrIII:12003071-12003571	putative_enhancer	enhancer	22981	877	182	7	313889	0.00779446
chrIII:11738302-11738802	putative_enhancer	enhancer	22470	511	128	chrIII:11743710-11744210	putative_enhancer	enhancer	22479	200	54	14	5408	0.00409841
chrIII:11834611-11835111	putative_enhancer	enhancer	22654	789	178	chrIII:12003071-12003571	putative_enhancer	enhancer	22981	877	182	8	168460	0.000832113
chrIII:11834611-11835111	putative_enhancer	enhancer	22654	789	178	chrIII:12549474-12549974	putative_enhancer	enhancer	24040	1237	213	9	714863	2.44e-09
chrIII:11834611-11835111	putative_enhancer	enhancer	22654	789	178	chrIII:12583324-12583824	putative_enhancer	enhancer	24102	1613	327	6	748713	0.00454832
chrIII:11935863-11936301	putative_enhancer	enhancer	22852	401	131	chrIII:11937743-11938243	putative_enhancer	enhancer	22856	299	76	22	1911	1.79e-05
chrIII:11980287-11980723	putative_enhancer	enhancer	22937	320	85	chrIII:12003071-12003571	putative_enhancer	enhancer	22981	877	182	10	22816	0.00457408
chrIII:12003071-12003571	putative_enhancer	enhancer	22981	877	182	chrIII:12138079-12138579	putative_enhancer	enhancer	23236	354	74	6	135008	0.0350817
chrIII:12135406-12135906	putative_enhancer	enhancer	23231	339	65	chrIII:12138079-12138579	putative_enhancer	enhancer	23236	354	74	23	2673	6.51e-08
chrIII:12136934-12137434	putative_enhancer	enhancer	23234	405	86	chrIII:12139333-12139833	putative_enhancer	enhancer	23238	642	143	42	2399	7.62e-11
chrIII:12136934-12137434	putative_enhancer	enhancer	23234	405	86	chrIII:12146476-12146976	putative_enhancer	enhancer	23252	297	54	12	9542	0.000535211
chrIII:12139333-12139833	putative_enhancer	enhancer	23238	642	143	chrIII:12146476-12146976	putative_enhancer	enhancer	23252	297	54	20	7143	2.06e-09
chrIII:1220010-1220461	putative_enhancer	enhancer	2341	463	82	chrIII:1223731-1224193	putative_enhancer	enhancer	2349	458	108	31	3727	7.62e-11
chrIII:1220010-1220461	putative_enhancer	enhancer	2341	463	82	chrIII:1226186-1226686	putative_enhancer	enhancer	2354	356	84	22	6201	7.62e-11
chrIII:1223731-1224193	putative_enhancer	enhancer	2349	458	108	chrIII:1226186-1226686	putative_enhancer	enhancer	2354	356	84	33	2474	7.62e-11
chrIII:12445105-12445605	putative_enhancer	enhancer	23834	311	62	chrIII:12549474-12549974	putative_enhancer	enhancer	24040	1237	213	7	104369	0.00659967
chrIII:12453623-12453994	putative_enhancer	enhancer	23851	243	52	chrIII:12583324-12583824	putative_enhancer	enhancer	24102	1613	327	6	129766	0.0373436
chrIII:12548403-12548808	putative_enhancer	enhancer	24038	277	72	chrIII:12549474-12549974	putative_enhancer	enhancer	24040	1237	213	44	1119	3.05e-10
chrIII:12548403-12548808	putative_enhancer	enhancer	24038	277	72	chrIII:12557937-12558437	putative_enhancer	enhancer	24056	1306	310	22	9582	7.62e-11
chrIII:12549474-12549974	putative_enhancer	enhancer	24040	1237	213	chrIII:12556021-12556521	putative_enhancer	enhancer	24053	601	157	24	6547	4.02e-07
chrIII:12549474-12549974	putative_enhancer	enhancer	24040	1237	213	chrIII:12557937-12558437	putative_enhancer	enhancer	24056	1306	310	73	8463	7.62e-11
chrIII:12549474-12549974	putative_enhancer	enhancer	24040	1237	213	chrIII:12566452-12566952	putative_enhancer	enhancer	24070	219	50	11	16978	0.000311039
chrIII:12549474-12549974	putative_enhancer	enhancer	24040	1237	213	chrIII:12568100-12568600	putative_enhancer	enhancer	24073	1292	312	71	18626	7.62e-11
chrIII:12549474-12549974	putative_enhancer	enhancer	24040	1237	213	chrIII:12583324-12583824	putative_enhancer	enhancer	24102	1613	327	74	33850	7.62e-11
chrIII:12549474-12549974	putative_enhancer	enhancer	24040	1237	213	chrIII:12598822-12599263	putative_enhancer	enhancer	24133	409	111	10	49318	0.000266425
chrIII:12549474-12549974	putative_enhancer	enhancer	24040	1237	213	chrIII:12613993-12614485	putative_enhancer	enhancer	24161	337	107	7	64515	0.00839847
chrIII:12549474-12549974	putative_enhancer	enhancer	24040	1237	213	chrIII:12614485-12614954	putative_enhancer	enhancer	24162	972	214	10	64995	0.000158367
chrIII:12549474-12549974	putative_enhancer	enhancer	24040	1237	213	chrIII:12841204-12841704	putative_enhancer	enhancer	24605	850	165	10	291730	1.68e-08
chrIII:12551143-12551643	putative_enhancer	enhancer	24043	192	46	chrIII:12583324-12583824	putative_enhancer	enhancer	24102	1613	327	13	32181	3.73e-09
chrIII:12556021-12556521	putative_enhancer	enhancer	24053	601	157	chrIII:12557937-12558437	putative_enhancer	enhancer	24056	1306	310	78	1916	7.62e-11
chrIII:12556021-12556521	putative_enhancer	enhancer	24053	601	157	chrIII:12568100-12568600	putative_enhancer	enhancer	24073	1292	312	25	12079	7.62e-11
chrIII:12556021-12556521	putative_enhancer	enhancer	24053	601	157	chrIII:12583324-12583824	putative_enhancer	enhancer	24102	1613	327	32	27303	7.62e-11
chrIII:12557937-12558437	putative_enhancer	enhancer	24056	1306	310	chrIII:12565635-12566108	putative_enhancer	enhancer	24069	338	56	24	7684	7.62e-11
chrIII:12557937-12558437	putative_enhancer	enhancer	24056	1306	310	chrIII:12568100-12568600	putative_enhancer	enhancer	24073	1292	312	96	10163	7.62e-11
chrIII:12557937-12558437	putative_enhancer	enhancer	24056	1306	310	chrIII:12583324-12583824	putative_enhancer	enhancer	24102	1613	327	78	25387	7.62e-11
chrIII:12565635-12566108	putative_enhancer	enhancer	24069	338	56	chrIII:12579090-12579590	putative_enhancer	enhancer	24094	241	81	12	13469	2.6e-07
chrIII:12568100-12568600	putative_enhancer	enhancer	24073	1292	312	chrIII:12583324-12583824	putative_enhancer	enhancer	24102	1613	327	86	15224	7.62e-11
chrIII:12568100-12568600	putative_enhancer	enhancer	24073	1292	312	chrIII:12614485-12614954	putative_enhancer	enhancer	24162	972	214	13	46369	3.4e-07
chrIII:12568100-12568600	putative_enhancer	enhancer	24073	1292	312	chrIII:13181837-13182337	putative_enhancer	enhancer	25260	681	167	6	613737	0.000987417
chrIII:12579090-12579590	putative_enhancer	enhancer	24094	241	81	chrIII:12583324-12583824	putative_enhancer	enhancer	24102	1613	327	19	4234	0.0294375
chrIII:12583324-12583824	putative_enhancer	enhancer	24102	1613	327	chrIII:12599608-12600013	putative_enhancer	enhancer	24135	219	63	12	16236	0.000356458
chrIII:12583324-12583824	putative_enhancer	enhancer	24102	1613	327	chrIII:12613525-12613911	putative_enhancer	enhancer	24160	401	111	9	30144	0.0261775
chrIII:12583324-12583824	putative_enhancer	enhancer	24102	1613	327	chrIII:12614485-12614954	putative_enhancer	enhancer	24162	972	214	17	31145	1.89e-08
chrIII:12613525-12613911	putative_enhancer	enhancer	24160	401	111	chrIII:12614485-12614954	putative_enhancer	enhancer	24162	972	214	26	1001	0.0234491
chrIII:12832936-12833436	putative_enhancer	enhancer	24591	285	66	chrIII:12847494-12847994	putative_enhancer	enhancer	24617	403	103	11	14558	1.44e-05
chrIII:13023862-13024246	putative_enhancer	enhancer	24952	133	40	chrIII:13059196-13059696	putative_enhancer	enhancer	25020	677	134	6	35392	0.0313528
chrIII:13059196-13059696	putative_enhancer	enhancer	25020	677	134	chrIII:13069226-13069704	putative_enhancer	enhancer	25039	295	101	13	10019	2.49e-07
chrIII:13181837-13182337	putative_enhancer	enhancer	25260	681	167	chrIII:13258598-13259098	putative_enhancer	enhancer	25408	762	217	12	76761	6.64e-08
chrIII:13181837-13182337	putative_enhancer	enhancer	25260	681	167	chrIII:13310409-13310909	putative_enhancer	enhancer	25509	372	107	7	128572	0.000473476
chrIII:13258598-13259098	putative_enhancer	enhancer	25408	762	217	chrIII:13298509-13298937	putative_enhancer	enhancer	25485	197	65	7	39875	0.0341026
chrIII:13258598-13259098	putative_enhancer	enhancer	25408	762	217	chrIII:13359707-13360207	putative_enhancer	enhancer	25605	983	267	8	101109	0.0334158
chrIII:13344777-13345174	putative_enhancer	enhancer	25575	261	80	chrIII:13359707-13360207	putative_enhancer	enhancer	25605	983	267	18	14982	7.62e-11
chrIII:13347718-13348218	putative_enhancer	enhancer	25581	339	95	chrIII:13359707-13360207	putative_enhancer	enhancer	25605	983	267	15	11989	0.0056352
chrIII:13657120-13657620	putative_enhancer	enhancer	26172	442	117	chrIII:13658835-13659335	putative_enhancer	enhancer	26175	383	97	27	1715	3.28e-07
chrIII:13708881-13709381	putative_enhancer	enhancer	26268	588	160	chrIII:13713616-13714116	putative_enhancer	enhancer	26276	676	173	25	4735	3.81e-10
chrIII:13713616-13714116	putative_enhancer	enhancer	26276	676	173	chrIII:13720219-13720719	putative_enhancer	enhancer	26286	499	150	13	6603	0.00432905
chrIII:1676519-1677019	putative_enhancer	enhancer	3227	146	34	chrIII:1680943-1681370	putative_enhancer	enhancer	3237	764	203	16	4387	0.000229189
chrIII:1680943-1681370	putative_enhancer	enhancer	3237	764	203	chrIII:1920845-1921241	putative_enhancer	enhancer	3708	1226	272	7	239887	0.00392669
chrIII:1680943-1681370	putative_enhancer	enhancer	3237	764	203	chrIII:1925054-1925554	putative_enhancer	enhancer	3716	3167	614	17	244148	7.62e-11
chrIII:1920845-1921241	putative_enhancer	enhancer	3708	1226	272	chrIII:1923462-1923916	putative_enhancer	enhancer	3713	1672	360	91	2646	7.62e-11
chrIII:1920845-1921241	putative_enhancer	enhancer	3708	1226	272	chrIII:1925054-1925554	putative_enhancer	enhancer	3716	3167	614	184	4261	7.62e-11
chrIII:1920845-1921241	putative_enhancer	enhancer	3708	1226	272	chrIII:2132007-2132507	putative_enhancer	enhancer	4118	377	80	6	211214	0.00962669
chrIII:1921241-1921638	putative_enhancer	enhancer	3709	2220	488	chrIII:1923462-1923916	putative_enhancer	enhancer	3713	1672	360	214	2250	7.62e-11
chrIII:1921241-1921638	putative_enhancer	enhancer	3709	2220	488	chrIII:1923916-1924371	putative_enhancer	enhancer	3714	327	71	29	2704	1.2e-06
chrIII:1921241-1921638	putative_enhancer	enhancer	3709	2220	488	chrIII:1925054-1925554	putative_enhancer	enhancer	3716	3167	614	477	3865	7.62e-11
chrIII:1921241-1921638	putative_enhancer	enhancer	3709	2220	488	chrIII:1951433-1951933	putative_enhancer	enhancer	3766	208	62	10	30244	0.013387
chrIII:1923462-1923916	putative_enhancer	enhancer	3713	1672	360	chrIII:1925054-1925554	putative_enhancer	enhancer	3716	3167	614	339	1615	7.62e-11
chrIII:1923916-1924371	putative_enhancer	enhancer	3714	327	71	chrIII:1925054-1925554	putative_enhancer	enhancer	3716	3167	614	48	1161	0.000243291
chrIII:1925054-1925554	putative_enhancer	enhancer	3716	3167	614	chrIII:2125926-2126426	putative_enhancer	enhancer	4106	519	111	13	200872	9.14e-10
chrIII:2090675-2091175	putative_enhancer	enhancer	4038	338	98	chrIII:2125926-2126426	putative_enhancer	enhancer	4106	519	111	8	35251	0.0122501
chrIII:2159143-2159643	putative_enhancer	enhancer	4172	357	90	chrIII:2170515-2171015	putative_enhancer	enhancer	4194	709	161	25	11372	7.62e-11
chrIII:220376-220798	putative_enhancer	enhancer	422	397	155	chrIII:96120-96620	putative_enhancer	enhancer	179	685	173	6	124217	0.0448325
chrIII:2628984-2629386	putative_enhancer	enhancer	5088	188	36	chrIII:2632842-2633342	putative_enhancer	enhancer	5095	558	140	14	3907	0.00424323
chrIII:2632842-2633342	putative_enhancer	enhancer	5095	558	140	chrIII:2647503-2648003	putative_enhancer	enhancer	5120	776	178	26	14661	7.62e-11
chrIII:2647503-2648003	putative_enhancer	enhancer	5120	776	178	chrIII:2651629-2652040	putative_enhancer	enhancer	5128	248	60	16	4081	0.0328537
chrIII:2647503-2648003	putative_enhancer	enhancer	5120	776	178	chrIII:2653118-2653566	putative_enhancer	enhancer	5131	445	92	33	5589	7.62e-11
chrIII:2647503-2648003	putative_enhancer	enhancer	5120	776	178	chrIII:2676017-2676517	putative_enhancer	enhancer	5176	536	140	22	28514	7.62e-11
chrIII:2653118-2653566	putative_enhancer	enhancer	5131	445	92	chrIII:2676017-2676517	putative_enhancer	enhancer	5176	536	140	13	22925	2.25e-07
chrIII:2874166-2874663	putative_enhancer	enhancer	5563	384	72	chrIII:2875883-2876383	putative_enhancer	enhancer	5566	900	178	45	1719	7.62e-11
chrIII:2874166-2874663	putative_enhancer	enhancer	5563	384	72	chrIII:3035978-3036478	putative_enhancer	enhancer	5872	982	251	7	161814	0.00077134
chrIII:2875883-2876383	putative_enhancer	enhancer	5566	900	178	chrIII:2948499-2948999	putative_enhancer	enhancer	5701	554	107	11	72616	1.89e-06
chrIII:2875883-2876383	putative_enhancer	enhancer	5566	900	178	chrIII:3037212-3037712	putative_enhancer	enhancer	5874	625	124	7	161329	0.0110411
chrIII:2875883-2876383	putative_enhancer	enhancer	5566	900	178	chrIII:3065862-3066290	putative_enhancer	enhancer	5929	782	164	10	189943	8.88e-07
chrIII:2948499-2948999	putative_enhancer	enhancer	5701	554	107	chrIII:3035978-3036478	putative_enhancer	enhancer	5872	982	251	9	87479	0.000356299
chrIII:2948499-2948999	putative_enhancer	enhancer	5701	554	107	chrIII:3065862-3066290	putative_enhancer	enhancer	5929	782	164	7	117327	0.00849001
chrIII:2980123-2980540	putative_enhancer	enhancer	5762	201	56	chrIII:3035978-3036478	putative_enhancer	enhancer	5872	982	251	8	55897	0.00183552
chrIII:3031243-3031743	putative_enhancer	enhancer	5863	339	62	chrIII:3034501-3035001	putative_enhancer	enhancer	5869	281	70	14	3258	0.0348225
chrIII:3031243-3031743	putative_enhancer	enhancer	5863	339	62	chrIII:3035978-3036478	putative_enhancer	enhancer	5872	982	251	25	4735	6.76e-07
chrIII:3031243-3031743	putative_enhancer	enhancer	5863	339	62	chrIII:3065862-3066290	putative_enhancer	enhancer	5929	782	164	11	34583	1.3e-05
chrIII:3034501-3035001	putative_enhancer	enhancer	5869	281	70	chrIII:3035978-3036478	putative_enhancer	enhancer	5872	982	251	32	1477	0.00230882
chrIII:3035978-3036478	putative_enhancer	enhancer	5872	982	251	chrIII:3037212-3037712	putative_enhancer	enhancer	5874	625	124	97	1234	7.62e-11
chrIII:3035978-3036478	putative_enhancer	enhancer	5872	982	251	chrIII:3065862-3066290	putative_enhancer	enhancer	5929	782	164	12	29848	0.0112862
chrIII:3037212-3037712	putative_enhancer	enhancer	5874	625	124	chrIII:3065862-3066290	putative_enhancer	enhancer	5929	782	164	12	28614	0.00013708
chrIII:3158178-3158678	putative_enhancer	enhancer	6109	308	86	chrIII:3161558-3162058	putative_enhancer	enhancer	6115	247	78	17	3380	2.47e-06
chrIII:3220238-3220708	putative_enhancer	enhancer	6227	455	113	chrIII:3271608-3272108	putative_enhancer	enhancer	6326	837	171	11	51385	1.15e-05
chrIII:3271608-3272108	putative_enhancer	enhancer	6326	837	171	chrIII:3273041-3273541	putative_enhancer	enhancer	6329	676	157	82	1433	7.62e-11
chrIII:3348987-3349487	putative_enhancer	enhancer	6473	339	62	chrIII:3351659-3352159	putative_enhancer	enhancer	6478	398	96	18	2672	0.000267716
chrIII:3348987-3349487	putative_enhancer	enhancer	6473	339	62	chrIII:3355762-3356262	putative_enhancer	enhancer	6486	353	90	17	6775	1.86e-07
chrIII:3351659-3352159	putative_enhancer	enhancer	6478	398	96	chrIII:3355762-3356262	putative_enhancer	enhancer	6486	353	90	20	4103	1.27e-07
chrIII:3351659-3352159	putative_enhancer	enhancer	6478	398	96	chrIII:3377609-3378109	putative_enhancer	enhancer	6526	414	65	8	25950	0.00836758
chrIII:3369988-3370488	putative_enhancer	enhancer	6513	468	94	chrIII:3581401-3581901	putative_enhancer	enhancer	6915	185	64	6	211413	0.000114242
chrIII:3377609-3378109	putative_enhancer	enhancer	6526	414	65	chrIII:3435161-3435623	putative_enhancer	enhancer	6636	323	72	7	57533	0.00161686
chrIII:3597977-3598477	putative_enhancer	enhancer	6946	212	57	chrIII:3637082-3637582	putative_enhancer	enhancer	7018	539	131	8	39105	0.000197698
chrIII:3601198-3601698	putative_enhancer	enhancer	6951	446	123	chrIII:3619567-3619961	putative_enhancer	enhancer	6986	1114	253	12	18316	0.0139302
chrIII:3619567-3619961	putative_enhancer	enhancer	6986	1114	253	chrIII:3620630-3621102	putative_enhancer	enhancer	6989	901	250	57	1102	2.7e-06
chrIII:3619567-3619961	putative_enhancer	enhancer	6986	1114	253	chrIII:3633698-3634176	putative_enhancer	enhancer	7012	358	97	13	14173	0.000421665
chrIII:3619567-3619961	putative_enhancer	enhancer	6986	1114	253	chrIII:3637082-3637582	putative_enhancer	enhancer	7018	539	131	12	17568	0.00296139
chrIII:3620630-3621102	putative_enhancer	enhancer	6989	901	250	chrIII:3672713-3673213	putative_enhancer	enhancer	7086	679	168	10	52097	6.22e-05
chrIII:3633698-3634176	putative_enhancer	enhancer	7012	358	97	chrIII:3637082-3637582	putative_enhancer	enhancer	7018	539	131	18	3395	0.000105108
chrIII:3785079-3785549	putative_enhancer	enhancer	7300	361	73	chrIII:3799131-3799631	putative_enhancer	enhancer	7328	646	148	11	14067	0.000214457
chrIII:3797611-3798099	putative_enhancer	enhancer	7325	601	171	chrIII:3799131-3799631	putative_enhancer	enhancer	7328	646	148	42	1526	7.62e-11
chrIII:382034-382534	putative_enhancer	enhancer	735	284	71	chrIII:385146-385604	putative_enhancer	enhancer	741	150	48	16	3091	2.89e-06
chrIII:4112394-4112894	putative_enhancer	enhancer	7921	205	63	chrIII:4113488-4113988	putative_enhancer	enhancer	7923	327	112	26	1094	7.04e-07
chrIII:4236122-4236596	putative_enhancer	enhancer	8159	737	179	chrIII:4237586-4238086	putative_enhancer	enhancer	8162	1778	411	88	1477	7.62e-11
chrIII:4237586-4238086	putative_enhancer	enhancer	8162	1778	411	chrIII:4284589-4285089	putative_enhancer	enhancer	8256	1098	254	17	47003	1.1e-07
chrIII:4237586-4238086	putative_enhancer	enhancer	8162	1778	411	chrIII:4316943-4317443	putative_enhancer	enhancer	8319	923	202	15	79357	1.34e-08
chrIII:4276663-4277053	putative_enhancer	enhancer	8240	233	81	chrIII:4284589-4285089	putative_enhancer	enhancer	8256	1098	254	11	7981	0.0413717
chrIII:4283070-4283570	putative_enhancer	enhancer	8253	498	157	chrIII:4316943-4317443	putative_enhancer	enhancer	8319	923	202	10	33873	0.000298306
chrIII:4284589-4285089	putative_enhancer	enhancer	8256	1098	254	chrIII:4316943-4317443	putative_enhancer	enhancer	8319	923	202	13	32354	6.51e-05
chrIII:4316943-4317443	putative_enhancer	enhancer	8319	923	202	chrIII:4328516-4329016	putative_enhancer	enhancer	8342	438	119	17	11573	1.55e-06
chrIII:434296-434796	putative_enhancer	enhancer	835	727	165	chrIII:96120-96620	putative_enhancer	enhancer	179	685	173	8	338176	1.85e-07
chrIII:434296-434796	putative_enhancer	enhancer	835	727	165	chrIII:749949-750449	putative_enhancer	enhancer	1429	461	138	7	315653	8.07e-06
chrIII:434296-434796	putative_enhancer	enhancer	835	727	165	chrIII:981888-982345	putative_enhancer	enhancer	1874	770	195	13	547570	7.62e-11
chrIII:4358242-4358742	putative_enhancer	enhancer	8397	299	97	chrIII:4359836-4360336	putative_enhancer	enhancer	8399	206	73	16	1594	0.0186956
chrIII:4495988-4496452	putative_enhancer	enhancer	8658	689	172	chrIII:4504268-4504768	putative_enhancer	enhancer	8673	861	254	14	8298	0.0166089
chrIII:4502449-4502857	putative_enhancer	enhancer	8669	718	214	chrIII:4561991-4562491	putative_enhancer	enhancer	8781	1548	459	9	59588	0.03437
chrIII:4504268-4504768	putative_enhancer	enhancer	8673	861	254	chrIII:4505634-4506114	putative_enhancer	enhancer	8675	463	148	31	1356	0.00284175
chrIII:4504268-4504768	putative_enhancer	enhancer	8673	861	254	chrIII:4561991-4562491	putative_enhancer	enhancer	8781	1548	459	10	57723	0.0268888
chrIII:5089402-5089902	putative_enhancer	enhancer	9803	448	97	chrIII:5096669-5097169	putative_enhancer	enhancer	9815	256	80	12	7267	0.0024363
chrIII:5108674-5109174	putative_enhancer	enhancer	9838	1074	238	chrIII:5173886-5174386	putative_enhancer	enhancer	9960	255	69	8	65212	0.00312798
chrIII:5137022-5137522	putative_enhancer	enhancer	9889	370	79	chrIII:5140442-5140930	putative_enhancer	enhancer	9894	470	116	20	3414	3.39e-06
chrIII:5137022-5137522	putative_enhancer	enhancer	9889	370	79	chrIII:5146810-5147222	putative_enhancer	enhancer	9906	301	78	11	9744	0.0010102
chrIII:5427533-5428030	putative_enhancer	enhancer	10443	488	118	chrIII:5434703-5435203	putative_enhancer	enhancer	10457	608	126	15	7172	0.000137777
chrIII:5434703-5435203	putative_enhancer	enhancer	10457	608	126	chrIII:5503181-5503584	putative_enhancer	enhancer	10586	1164	315	8	68429	0.0146512
chrIII:5436017-5436517	putative_enhancer	enhancer	10459	337	87	chrIII:5464755-5465255	putative_enhancer	enhancer	10514	379	84	7	28738	0.00666402
chrIII:558762-559262	putative_enhancer	enhancer	1068	847	212	chrIII:651590-652079	putative_enhancer	enhancer	1244	522	144	8	92822	0.00725719
chrIII:5665168-5665668	putative_enhancer	enhancer	10893	613	171	chrIII:5667970-5668470	putative_enhancer	enhancer	10900	828	227	36	2802	7.62e-11
chrIII:5666944-5667344	putative_enhancer	enhancer	10898	433	114	chrIII:5667970-5668470	putative_enhancer	enhancer	10900	828	227	37	1076	1.5e-05
chrIII:5721890-5722349	putative_enhancer	enhancer	11000	488	110	chrIII:5723205-5723705	putative_enhancer	enhancer	11002	429	80	25	1336	0.0109595
chrIII:5812575-5813075	putative_enhancer	enhancer	11171	567	146	chrIII:5836679-5837179	putative_enhancer	enhancer	11216	661	213	12	24104	3.41e-07
chrIII:5836143-5836643	putative_enhancer	enhancer	11215	638	159	chrIII:5843514-5844014	putative_enhancer	enhancer	11228	511	154	14	7371	0.00147256
chrIII:5930561-5931061	putative_enhancer	enhancer	11392	347	124	chrIII:5949698-5950198	putative_enhancer	enhancer	11429	647	215	9	19137	0.00524628
chrIII:621334-621834	putative_enhancer	enhancer	1187	589	115	chrIII:647189-647689	putative_enhancer	enhancer	1236	486	110	12	25855	1.11e-05
chrIII:621334-621834	putative_enhancer	enhancer	1187	589	115	chrIII:651590-652079	putative_enhancer	enhancer	1244	522	144	9	30250	0.0345259
chrIII:6359208-6359708	putative_enhancer	enhancer	12199	574	157	chrIII:6360758-6361258	putative_enhancer	enhancer	12201	788	167	29	1550	0.00432007
chrIII:6359208-6359708	putative_enhancer	enhancer	12199	574	157	chrIII:6361442-6361915	putative_enhancer	enhancer	12202	664	171	24	2220	0.000156918
chrIII:6693184-6693684	putative_enhancer	enhancer	12841	318	79	chrIII:6802984-6803484	putative_enhancer	enhancer	13054	266	66	8	109800	8.07e-09
chrIII:6693184-6693684	putative_enhancer	enhancer	12841	318	79	chrIII:6895018-6895518	putative_enhancer	enhancer	13224	1287	277	7	201834	0.000141898
chrIII:6990868-6991353	putative_enhancer	enhancer	13410	354	101	chrIII:6992473-6992973	putative_enhancer	enhancer	13413	452	116	19	1613	0.0479497
chrIII:7202983-7203483	putative_enhancer	enhancer	13817	440	138	chrIII:7210641-7211061	putative_enhancer	enhancer	13833	330	83	11	7618	0.0223593
chrIII:744442-744942	putative_enhancer	enhancer	1421	220	63	chrIII:749949-750449	putative_enhancer	enhancer	1429	461	138	15	5507	4.42e-05
chrIII:748714-749214	putative_enhancer	enhancer	1427	457	113	chrIII:749949-750449	putative_enhancer	enhancer	1429	461	138	37	1235	2.54e-07
chrIII:748714-749214	putative_enhancer	enhancer	1427	457	113	chrIII:758938-759438	putative_enhancer	enhancer	1446	350	82	11	10224	0.0330042
chrIII:749949-750449	putative_enhancer	enhancer	1429	461	138	chrIII:758938-759438	putative_enhancer	enhancer	1446	350	82	18	8989	4.49e-09
chrIII:7709941-7710441	putative_enhancer	enhancer	14790	787	176	chrIII:7728338-7728838	putative_enhancer	enhancer	14819	1101	295	18	18397	1.71e-08
chrIII:7716391-7716891	putative_enhancer	enhancer	14800	275	52	chrIII:7729428-7729900	putative_enhancer	enhancer	14821	1348	435	13	13023	7.22e-06
chrIII:7720750-7721250	putative_enhancer	enhancer	14807	416	144	chrIII:7729428-7729900	putative_enhancer	enhancer	14821	1348	435	26	8664	7.62e-11
chrIII:7723548-7724048	putative_enhancer	enhancer	14811	531	173	chrIII:7729428-7729900	putative_enhancer	enhancer	14821	1348	435	31	5866	7.62e-11
chrIII:7728338-7728838	putative_enhancer	enhancer	14819	1101	295	chrIII:7729428-7729900	putative_enhancer	enhancer	14821	1348	435	101	1076	7.62e-11
chrIII:8105610-8106110	putative_enhancer	enhancer	15551	500	100	chrIII:8125133-8125633	putative_enhancer	enhancer	15586	1453	308	12	19523	0.00737265
chrIII:8124251-8124751	putative_enhancer	enhancer	15585	1158	303	chrIII:8125679-8126179	putative_enhancer	enhancer	15587	802	200	45	1428	2.59e-05
chrIII:8124251-8124751	putative_enhancer	enhancer	15585	1158	303	chrIII:8128020-8128520	putative_enhancer	enhancer	15591	670	149	30	3769	1.63e-06
chrIII:8125679-8126179	putative_enhancer	enhancer	15587	802	200	chrIII:8128020-8128520	putative_enhancer	enhancer	15591	670	149	26	2341	0.004085
chrIII:8731913-8732349	putative_enhancer	enhancer	16739	466	116	chrIII:8734275-8734775	putative_enhancer	enhancer	16743	985	229	31	2394	3.72e-07
chrIII:8780339-8780839	putative_enhancer	enhancer	16832	810	202	chrIII:8794587-8795087	putative_enhancer	enhancer	16858	1347	322	23	14248	7.62e-11
chrIII:8794587-8795087	putative_enhancer	enhancer	16858	1347	322	chrIII:8800228-8800583	putative_enhancer	enhancer	16869	1464	380	33	5568	7.62e-11
chrIII:8794587-8795087	putative_enhancer	enhancer	16858	1347	322	chrIII:8800583-8801019	putative_enhancer	enhancer	16870	736	236	18	5964	0.00474895
chrIII:8794587-8795087	putative_enhancer	enhancer	16858	1347	322	chrIII:8801197-8801606	putative_enhancer	enhancer	16871	852	227	18	6564	0.00104997
chrIII:8794587-8795087	putative_enhancer	enhancer	16858	1347	322	chrIII:8801606-8801927	putative_enhancer	enhancer	16872	1364	364	36	6929	7.62e-11
chrIII:8800228-8800583	putative_enhancer	enhancer	16869	1464	380	chrIII:8801606-8801927	putative_enhancer	enhancer	16872	1364	364	87	1361	7.62e-11
chrIII:8800228-8800583	putative_enhancer	enhancer	16869	1464	380	chrIII:8874039-8874539	putative_enhancer	enhancer	17010	1676	482	9	73884	0.0298813
chrIII:8869277-8869738	putative_enhancer	enhancer	17001	590	118	chrIII:8874039-8874539	putative_enhancer	enhancer	17010	1676	482	49	4782	7.62e-11
chrIII:9237579-9237979	putative_enhancer	enhancer	17704	329	57	chrIII:9270003-9270503	putative_enhancer	enhancer	17767	387	95	7	32474	0.00185979
chrIII:9270003-9270503	putative_enhancer	enhancer	17767	387	95	chrIII:9326380-9326880	putative_enhancer	enhancer	17872	463	96	7	56377	0.00248158
chrIII:9288417-9288812	putative_enhancer	enhancer	17801	225	42	chrIII:9326380-9326880	putative_enhancer	enhancer	17872	463	96	7	38016	0.00181195
chrIII:9476016-9476451	putative_enhancer	enhancer	18152	375	110	chrIII:9666581-9667051	putative_enhancer	enhancer	18513	652	111	6	190583	0.00018657
chrIII:9620045-9620545	putative_enhancer	enhancer	18425	902	182	chrIII:9622081-9622486	putative_enhancer	enhancer	18428	435	100	24	1988	0.00101088
chrIII:9620045-9620545	putative_enhancer	enhancer	18425	902	182	chrIII:9642288-9642731	putative_enhancer	enhancer	18467	293	90	9	22214	0.00158946
chrIII:9646256-9646756	putative_enhancer	enhancer	18475	544	125	chrIII:9661010-9661510	putative_enhancer	enhancer	18502	420	99	16	14754	7.62e-11
chrIII:9665335-9665750	putative_enhancer	enhancer	18510	961	220	chrIII:9666581-9667051	putative_enhancer	enhancer	18513	652	111	35	1274	0.000124885
chrIII:9697814-9698314	putative_enhancer	enhancer	18572	524	144	chrIII:9702970-9703421	putative_enhancer	enhancer	18582	664	194	16	5131	5.31e-06
chrIII:9700104-9700546	putative_enhancer	enhancer	18576	645	163	chrIII:9701231-9701677	putative_enhancer	enhancer	18578	634	157	27	1129	0.0200068
chrIII:9700104-9700546	putative_enhancer	enhancer	18576	645	163	chrIII:9705036-9705467	putative_enhancer	enhancer	18586	408	122	13	4926	0.00807009
chrIII:9701231-9701677	putative_enhancer	enhancer	18578	634	157	chrIII:9702970-9703421	putative_enhancer	enhancer	18582	664	194	25	1741	9.8e-06
chrIII:9701231-9701677	putative_enhancer	enhancer	18578	634	157	chrIII:9703505-9703940	putative_enhancer	enhancer	18583	705	194	24	2268	0.000378939
chrIV:10330038-10330488	putative_enhancer	enhancer	19839	320	87	chrIV:10344522-10345022	putative_enhancer	enhancer	19865	712	198	9	14509	0.0320841
chrIV:10341586-10342026	putative_enhancer	enhancer	19859	375	144	chrIV:10344522-10345022	putative_enhancer	enhancer	19865	712	198	16	2966	0.00551528
chrIV:10342026-10342370	putative_enhancer	enhancer	19860	774	254	chrIV:10344522-10345022	putative_enhancer	enhancer	19865	712	198	26	2574	4.21e-06
chrIV:10420328-10420767	putative_enhancer	enhancer	20010	371	76	chrIV:10502271-10502768	putative_enhancer	enhancer	20164	649	143	6	81972	0.00204677
chrIV:10506590-10507090	putative_enhancer	enhancer	20172	501	116	chrIV:10515877-10516377	putative_enhancer	enhancer	20188	230	53	9	9287	0.0255012
chrIV:10569979-10570479	putative_enhancer	enhancer	20291	484	91	chrIV:10575733-10576233	putative_enhancer	enhancer	20302	305	58	12	5754	0.0141724
chrIV:10569979-10570479	putative_enhancer	enhancer	20291	484	91	chrIV:10576546-10577046	putative_enhancer	enhancer	20303	523	93	17	6567	4.16e-07
chrIV:10569979-10570479	putative_enhancer	enhancer	20291	484	91	chrIV:10609797-10610297	putative_enhancer	enhancer	20368	382	73	7	39818	0.001431
chrIV:10609797-10610297	putative_enhancer	enhancer	20368	382	73	chrIV:10612247-10612747	putative_enhancer	enhancer	20372	418	100	16	2450	2.32e-05
chrIV:10781921-10782421	putative_enhancer	enhancer	20700	493	92	chrIV:10784046-10784546	putative_enhancer	enhancer	20704	407	60	22	2125	3.72e-06
chrIV:10802367-10802794	putative_enhancer	enhancer	20738	415	68	chrIV:10820011-10820511	putative_enhancer	enhancer	20771	670	121	10	17681	0.00030147
chrIV:10817472-10817965	putative_enhancer	enhancer	20767	344	94	chrIV:10822054-10822472	putative_enhancer	enhancer	20775	865	230	15	4545	4.18e-05
chrIV:10822054-10822472	putative_enhancer	enhancer	20775	865	230	chrIV:10852335-10852835	putative_enhancer	enhancer	20832	892	190	10	30322	0.00366588
chrIV:10909640-10910140	putative_enhancer	enhancer	20943	553	102	chrIV:10912895-10913395	putative_enhancer	enhancer	20949	194	52	12	3255	0.0439793
chrIV:10971686-10972186	putative_enhancer	enhancer	21061	537	95	chrIV:10975819-10976319	putative_enhancer	enhancer	21069	834	137	35	4133	8.81e-11
chrIV:10971686-10972186	putative_enhancer	enhancer	21061	537	95	chrIV:10978455-10978866	putative_enhancer	enhancer	21074	316	62	15	6724	3.72e-08
chrIV:10975819-10976319	putative_enhancer	enhancer	21069	834	137	chrIV:10978455-10978866	putative_enhancer	enhancer	21074	316	62	21	2591	1.61e-06
chrIV:11063082-11063582	putative_enhancer	enhancer	21234	282	66	chrIV:11068230-11068730	putative_enhancer	enhancer	21242	386	78	18	5148	2.64e-10
chrIV:11285992-11286492	putative_enhancer	enhancer	21656	314	66	chrIV:11288866-11289286	putative_enhancer	enhancer	21661	433	70	25	2834	8.81e-11
chrIV:11489883-11490298	putative_enhancer	enhancer	22046	679	148	chrIV:11491359-11491831	putative_enhancer	enhancer	22049	623	157	29	1505	1.88e-07
chrIV:11491359-11491831	putative_enhancer	enhancer	22049	623	157	chrIV:11493828-11494328	putative_enhancer	enhancer	22053	543	116	21	2483	2.14e-06
chrIV:11609774-11610274	putative_enhancer	enhancer	22274	47	11	chrIV:11616483-11616983	putative_enhancer	enhancer	22287	61	14	28	6709	8.81e-11
chrIV:11700113-11700595	putative_enhancer	enhancer	22446	496	101	chrIV:11702495-11702995	putative_enhancer	enhancer	22449	296	78	16	2391	0.000201258
chrIV:11702495-11702995	putative_enhancer	enhancer	22449	296	78	chrIV:11717022-11717522	putative_enhancer	enhancer	22475	335	96	7	14527	0.0235868
chrIV:11717022-11717522	putative_enhancer	enhancer	22475	335	96	chrIV:11720424-11720901	putative_enhancer	enhancer	22481	305	66	15	3390	2.36e-05
chrIV:11897689-11898148	putative_enhancer	enhancer	22818	462	92	chrIV:11917829-11918329	putative_enhancer	enhancer	22857	501	81	8	20161	0.00398073
chrIV:11898486-11898976	putative_enhancer	enhancer	22819	322	87	chrIV:11955526-11956026	putative_enhancer	enhancer	22929	949	192	7	57045	0.00129335
chrIV:11916740-11917240	putative_enhancer	enhancer	22855	477	116	chrIV:11917829-11918329	putative_enhancer	enhancer	22857	501	81	30	1089	7.01e-07
chrIV:11917829-11918329	putative_enhancer	enhancer	22857	501	81	chrIV:11955526-11956026	putative_enhancer	enhancer	22929	949	192	11	37697	1.27e-07
chrIV:12197651-12198086	putative_enhancer	enhancer	23394	305	63	chrIV:12199522-12200000	putative_enhancer	enhancer	23397	363	98	15	1893	0.032841
chrIV:12396769-12397269	putative_enhancer	enhancer	23779	634	111	chrIV:12399811-12400311	putative_enhancer	enhancer	23784	335	64	17	3042	0.00114073
chrIV:12396769-12397269	putative_enhancer	enhancer	23779	634	111	chrIV:12401425-12401906	putative_enhancer	enhancer	23787	307	67	15	4646	0.000205133
chrIV:12617201-12617701	putative_enhancer	enhancer	24198	804	158	chrIV:13029779-13030279	putative_enhancer	enhancer	24977	1197	252	6	412578	0.00424324
chrIV:12641311-12641811	putative_enhancer	enhancer	24243	398	81	chrIV:12698383-12698843	putative_enhancer	enhancer	24353	456	98	11	57052	8.81e-11
chrIV:12698843-12699304	putative_enhancer	enhancer	24354	398	96	chrIV:12700142-12700541	putative_enhancer	enhancer	24356	413	86	25	1268	1.05e-06
chrIV:12812571-12813071	putative_enhancer	enhancer	24572	201	47	chrIV:12816678-12817178	putative_enhancer	enhancer	24580	354	79	16	4107	3.43e-09
chrIV:12813118-12813545	putative_enhancer	enhancer	24573	216	44	chrIV:12834239-12834719	putative_enhancer	enhancer	24612	866	213	8	21148	0.00443253
chrIV:12814644-12815039	putative_enhancer	enhancer	24577	290	48	chrIV:12815987-12816487	putative_enhancer	enhancer	24579	400	91	25	1396	1.76e-09
chrIV:12834239-12834719	putative_enhancer	enhancer	24612	866	213	chrIV:12840258-12840736	putative_enhancer	enhancer	24623	710	136	21	6018	1.02e-05
chrIV:12834239-12834719	putative_enhancer	enhancer	24612	866	213	chrIV:13029779-13030279	putative_enhancer	enhancer	24977	1197	252	8	195550	0.000134796
chrIV:13008686-13009089	putative_enhancer	enhancer	24939	435	88	chrIV:13029779-13030279	putative_enhancer	enhancer	24977	1197	252	10	21142	0.00502227
chrIV:13011253-13011753	putative_enhancer	enhancer	24943	302	77	chrIV:13013131-13013631	putative_enhancer	enhancer	24946	546	80	23	1878	3.47e-07
chrIV:13013131-13013631	putative_enhancer	enhancer	24946	546	80	chrIV:13029779-13030279	putative_enhancer	enhancer	24977	1197	252	11	16648	0.0136784
chrIV:13015723-13016223	putative_enhancer	enhancer	24951	463	99	chrIV:13029779-13030279	putative_enhancer	enhancer	24977	1197	252	12	14056	0.00621801
chrIV:13016649-13017051	putative_enhancer	enhancer	24952	175	51	chrIV:13025859-13026359	putative_enhancer	enhancer	24970	478	142	8	9259	0.0143746
chrIV:13025859-13026359	putative_enhancer	enhancer	24970	478	142	chrIV:13029779-13030279	putative_enhancer	enhancer	24977	1197	252	26	3920	3.6e-08
chrIV:13028339-13028729	putative_enhancer	enhancer	24974	538	114	chrIV:13029779-13030279	putative_enhancer	enhancer	24977	1197	252	38	1495	5.37e-09
chrIV:13367529-13368029	putative_enhancer	enhancer	25627	212	42	chrIV:13393534-13393856	putative_enhancer	enhancer	25677	291	60	6	25916	0.00978489
chrIV:13483234-13483734	putative_enhancer	enhancer	25852	368	89	chrIV:13493499-13493999	putative_enhancer	enhancer	25871	258	58	12	10265	1.1e-05
chrIV:1361751-1362251	putative_enhancer	enhancer	2627	283	54	chrIV:1857801-1858232	putative_enhancer	enhancer	3579	1159	260	6	496015	0.000148805
chrIV:1365341-1365759	putative_enhancer	enhancer	2633	156	45	chrIV:1378902-1379402	putative_enhancer	enhancer	2658	395	85	8	13602	0.0353276
chrIV:13682673-13683173	putative_enhancer	enhancer	26237	433	79	chrIV:13718875-13719375	putative_enhancer	enhancer	26305	450	80	10	36202	1.17e-06
chrIV:13695648-13696060	putative_enhancer	enhancer	26261	595	120	chrIV:13699502-13699907	putative_enhancer	enhancer	26269	408	114	16	3850	0.000730819
chrIV:1371285-1371785	putative_enhancer	enhancer	2645	484	108	chrIV:1373071-1373571	putative_enhancer	enhancer	2648	326	89	35	1786	8.81e-11
chrIV:1371285-1371785	putative_enhancer	enhancer	2645	484	108	chrIV:1381939-1382321	putative_enhancer	enhancer	2663	258	60	16	10595	8.81e-11
chrIV:13718875-13719375	putative_enhancer	enhancer	26305	450	80	chrIV:13720916-13721416	putative_enhancer	enhancer	26309	274	58	21	2041	3.49e-05
chrIV:1373071-1373571	putative_enhancer	enhancer	2648	326	89	chrIV:1381939-1382321	putative_enhancer	enhancer	2663	258	60	13	8809	1.88e-08
chrIV:1378902-1379402	putative_enhancer	enhancer	2658	395	85	chrIV:1389661-1390046	putative_enhancer	enhancer	2679	280	48	12	10701	2.15e-05
chrIV:13877602-13878102	putative_enhancer	enhancer	26614	675	165	chrIV:14033133-14033522	putative_enhancer	enhancer	26914	1618	661	8	155475	0.000730086
chrIV:13919130-13919630	putative_enhancer	enhancer	26692	538	123	chrIV:13940748-13941248	putative_enhancer	enhancer	26734	242	44	13	21618	2.11e-09
chrIV:13919130-13919630	putative_enhancer	enhancer	26692	538	123	chrIV:14034100-14034600	putative_enhancer	enhancer	26916	908	223	7	114970	0.000764027
chrIV:13934232-13934732	putative_enhancer	enhancer	26722	170	41	chrIV:13949611-13950111	putative_enhancer	enhancer	26751	173	42	7	15379	0.0258067
chrIV:14032699-14033133	putative_enhancer	enhancer	26913	1693	439	chrIV:14034100-14034600	putative_enhancer	enhancer	26916	908	223	100	1434	8.81e-11
chrIV:14032699-14033133	putative_enhancer	enhancer	26913	1693	439	chrIV:14837985-14838485	putative_enhancer	enhancer	28480	1310	304	7	805319	0.00032861
chrIV:14033133-14033522	putative_enhancer	enhancer	26914	1618	661	chrIV:14034100-14034600	putative_enhancer	enhancer	26916	908	223	101	1023	8.81e-11
chrIV:14033133-14033522	putative_enhancer	enhancer	26914	1618	661	chrIV:14620491-14620944	putative_enhancer	enhancer	28059	1332	342	8	587390	8.63e-06
chrIV:14384124-14384624	putative_enhancer	enhancer	27600	229	50	chrIV:14391596-14392096	putative_enhancer	enhancer	27614	601	138	11	7472	0.0139663
chrIV:14385079-14385579	putative_enhancer	enhancer	27602	395	92	chrIV:14391596-14392096	putative_enhancer	enhancer	27614	601	138	39	6517	8.81e-11
chrIV:14385079-14385579	putative_enhancer	enhancer	27602	395	92	chrIV:14414105-14414605	putative_enhancer	enhancer	27658	488	89	9	29026	4.43e-05
chrIV:14390155-14390655	putative_enhancer	enhancer	27611	301	63	chrIV:14391596-14392096	putative_enhancer	enhancer	27614	601	138	25	1441	0.000580131
chrIV:14413302-14413802	putative_enhancer	enhancer	27657	352	72	chrIV:14456638-14457082	putative_enhancer	enhancer	27740	319	61	10	43308	7.48e-09
chrIV:14413302-14413802	putative_enhancer	enhancer	27657	352	72	chrIV:14594141-14594641	putative_enhancer	enhancer	28009	1214	221	7	180839	0.000103855
chrIV:14456638-14457082	putative_enhancer	enhancer	27740	319	61	chrIV:14483321-14483821	putative_enhancer	enhancer	27792	268	66	11	26711	3.26e-09
chrIV:14561561-14562061	putative_enhancer	enhancer	27946	189	56	chrIV:14594141-14594641	putative_enhancer	enhancer	28009	1214	221	12	32580	4.05e-09
chrIV:14562831-14563331	putative_enhancer	enhancer	27948	347	51	chrIV:14594141-14594641	putative_enhancer	enhancer	28009	1214	221	17	31310	8.81e-11
chrIV:14594141-14594641	putative_enhancer	enhancer	28009	1214	221	chrIV:14597774-14598274	putative_enhancer	enhancer	28016	341	58	34	3633	8.81e-11
chrIV:14594141-14594641	putative_enhancer	enhancer	28009	1214	221	chrIV:14609753-14610188	putative_enhancer	enhancer	28039	573	103	22	15579	8.81e-11
chrIV:14594141-14594641	putative_enhancer	enhancer	28009	1214	221	chrIV:14610839-14611279	putative_enhancer	enhancer	28041	975	231	40	16668	8.81e-11
chrIV:14594141-14594641	putative_enhancer	enhancer	28009	1214	221	chrIV:14611725-14612117	putative_enhancer	enhancer	28043	345	83	9	17530	0.00974036
chrIV:14594141-14594641	putative_enhancer	enhancer	28009	1214	221	chrIV:14612117-14612498	putative_enhancer	enhancer	28044	448	128	12	17916	1.82e-05
chrIV:14594141-14594641	putative_enhancer	enhancer	28009	1214	221	chrIV:14612498-14612918	putative_enhancer	enhancer	28045	848	194	18	18317	8.81e-11
chrIV:14594141-14594641	putative_enhancer	enhancer	28009	1214	221	chrIV:14613334-14613820	putative_enhancer	enhancer	28047	372	103	13	19186	1.17e-07
chrIV:14594141-14594641	putative_enhancer	enhancer	28009	1214	221	chrIV:14614062-14614562	putative_enhancer	enhancer	28048	649	156	27	19921	8.81e-11
chrIV:14594141-14594641	putative_enhancer	enhancer	28009	1214	221	chrIV:14620491-14620944	putative_enhancer	enhancer	28059	1332	342	35	26326	8.81e-11
chrIV:14609753-14610188	putative_enhancer	enhancer	28039	573	103	chrIV:14610839-14611279	putative_enhancer	enhancer	28041	975	231	32	1089	0.0288826
chrIV:14609753-14610188	putative_enhancer	enhancer	28039	573	103	chrIV:14620035-14620491	putative_enhancer	enhancer	28058	500	90	10	10293	0.00816019
chrIV:14609753-14610188	putative_enhancer	enhancer	28039	573	103	chrIV:14620491-14620944	putative_enhancer	enhancer	28059	1332	342	19	10747	2.29e-07
chrIV:14610839-14611279	putative_enhancer	enhancer	28041	975	231	chrIV:14612117-14612498	putative_enhancer	enhancer	28044	448	128	35	1248	5.72e-09
chrIV:14610839-14611279	putative_enhancer	enhancer	28041	975	231	chrIV:14612498-14612918	putative_enhancer	enhancer	28045	848	194	31	1649	1.49e-05
chrIV:14610839-14611279	putative_enhancer	enhancer	28041	975	231	chrIV:14612918-14613334	putative_enhancer	enhancer	28046	432	108	23	2067	5.18e-06
chrIV:14610839-14611279	putative_enhancer	enhancer	28041	975	231	chrIV:14614062-14614562	putative_enhancer	enhancer	28048	649	156	29	3253	8.81e-11
chrIV:14610839-14611279	putative_enhancer	enhancer	28041	975	231	chrIV:14620035-14620491	putative_enhancer	enhancer	28058	500	90	13	9204	0.000105987
chrIV:14610839-14611279	putative_enhancer	enhancer	28041	975	231	chrIV:14620491-14620944	putative_enhancer	enhancer	28059	1332	342	30	9658	8.81e-11
chrIV:14611725-14612117	putative_enhancer	enhancer	28043	345	83	chrIV:14614062-14614562	putative_enhancer	enhancer	28048	649	156	18	2391	1.12e-05
chrIV:14612498-14612918	putative_enhancer	enhancer	28045	848	194	chrIV:14614062-14614562	putative_enhancer	enhancer	28048	649	156	29	1604	7.12e-07
chrIV:14612498-14612918	putative_enhancer	enhancer	28045	848	194	chrIV:14620035-14620491	putative_enhancer	enhancer	28058	500	90	16	7555	2.15e-08
chrIV:14612498-14612918	putative_enhancer	enhancer	28045	848	194	chrIV:14620491-14620944	putative_enhancer	enhancer	28059	1332	342	37	8009	8.81e-11
chrIV:14612918-14613334	putative_enhancer	enhancer	28046	432	108	chrIV:14620491-14620944	putative_enhancer	enhancer	28059	1332	342	14	7591	0.00222041
chrIV:14794256-14794676	putative_enhancer	enhancer	28395	916	231	chrIV:14837985-14838485	putative_enhancer	enhancer	28480	1310	304	19	43769	8.81e-11
chrIV:14837985-14838485	putative_enhancer	enhancer	28480	1310	304	chrIV:14869760-14870260	putative_enhancer	enhancer	28542	510	88	20	31775	8.81e-11
chrIV:14837985-14838485	putative_enhancer	enhancer	28480	1310	304	chrIV:14876583-14877083	putative_enhancer	enhancer	28555	533	114	17	38598	8.81e-11
chrIV:14869760-14870260	putative_enhancer	enhancer	28542	510	88	chrIV:14876583-14877083	putative_enhancer	enhancer	28555	533	114	35	6823	8.81e-11
chrIV:14869760-14870260	putative_enhancer	enhancer	28542	510	88	chrIV:14877600-14878100	putative_enhancer	enhancer	28557	240	67	11	7840	0.000559023
chrIV:14876583-14877083	putative_enhancer	enhancer	28555	533	114	chrIV:14877600-14878100	putative_enhancer	enhancer	28557	240	67	26	1017	2.04e-05
chrIV:14885405-14885905	putative_enhancer	enhancer	28572	379	61	chrIV:14889239-14889649	putative_enhancer	enhancer	28579	331	87	18	3789	1.42e-06
chrIV:15385080-15385580	putative_enhancer	enhancer	29548	443	103	chrIV:15393100-15393600	putative_enhancer	enhancer	29563	332	82	22	8020	8.81e-11
chrIV:15385080-15385580	putative_enhancer	enhancer	29548	443	103	chrIV:15398578-15399078	putative_enhancer	enhancer	29573	463	140	26	13498	8.81e-11
chrIV:15385080-15385580	putative_enhancer	enhancer	29548	443	103	chrIV:16024033-16024533	putative_enhancer	enhancer	30790	773	236	7	638953	4.28e-07
chrIV:15393100-15393600	putative_enhancer	enhancer	29563	332	82	chrIV:15398578-15399078	putative_enhancer	enhancer	29573	463	140	14	5478	0.00012391
chrIV:15395182-15395682	putative_enhancer	enhancer	29567	272	72	chrIV:15398578-15399078	putative_enhancer	enhancer	29573	463	140	18	3396	2.28e-06
chrIV:15433741-15434214	putative_enhancer	enhancer	29643	169	48	chrIV:15476291-15476791	putative_enhancer	enhancer	29726	246	90	6	42564	0.00468857
chrIV:16024033-16024533	putative_enhancer	enhancer	30790	773	236	chrIV:16119536-16120036	putative_enhancer	enhancer	30975	287	56	7	95503	0.00207514
chrIV:16024033-16024533	putative_enhancer	enhancer	30790	773	236	chrIV:16171224-16171724	putative_enhancer	enhancer	31075	407	105	6	147191	0.00598427
chrIV:16169625-16170125	putative_enhancer	enhancer	31072	885	250	chrIV:16171224-16171724	putative_enhancer	enhancer	31075	407	105	39	1599	8.81e-11
chrIV:16169625-16170125	putative_enhancer	enhancer	31072	885	250	chrIV:16178344-16178844	putative_enhancer	enhancer	31087	358	92	17	8719	1.54e-08
chrIV:16171224-16171724	putative_enhancer	enhancer	31075	407	105	chrIV:16178344-16178844	putative_enhancer	enhancer	31087	358	92	10	7120	0.00910968
chrIV:16396594-16397094	putative_enhancer	enhancer	31514	223	69	chrIV:16405072-16405572	putative_enhancer	enhancer	31530	192	57	8	8478	0.0429999
chrIV:16494291-16494613	putative_enhancer	enhancer	31701	237	58	chrIV:16497939-16498439	putative_enhancer	enhancer	31708	957	302	18	3737	1.53e-08
chrIV:16496439-16496939	putative_enhancer	enhancer	31705	323	112	chrIV:16497939-16498439	putative_enhancer	enhancer	31708	957	302	37	1500	8.81e-11
chrIV:17171643-17172143	putative_enhancer	enhancer	33025	350	122	chrIV:17179020-17179516	putative_enhancer	enhancer	33039	200	81	17	7375	8.81e-11
chrIV:1751158-1751658	putative_enhancer	enhancer	3379	234	69	chrIV:1764263-1764763	putative_enhancer	enhancer	3402	170	59	8	13105	0.00453219
chrIV:1758544-1759044	putative_enhancer	enhancer	3392	234	81	chrIV:1761077-1761534	putative_enhancer	enhancer	3397	156	67	13	2511	0.000682868
chrIV:1837104-1837604	putative_enhancer	enhancer	3541	1022	203	chrIV:1838541-1839041	putative_enhancer	enhancer	3544	579	113	50	1437	8.81e-11
chrIV:1837104-1837604	putative_enhancer	enhancer	3541	1022	203	chrIV:1844993-1845493	putative_enhancer	enhancer	3556	823	189	52	7889	8.81e-11
chrIV:1837104-1837604	putative_enhancer	enhancer	3541	1022	203	chrIV:1853960-1854460	putative_enhancer	enhancer	3572	341	74	19	16856	8.81e-11
chrIV:1837104-1837604	putative_enhancer	enhancer	3541	1022	203	chrIV:1857801-1858232	putative_enhancer	enhancer	3579	1159	260	49	20662	8.81e-11
chrIV:1837104-1837604	putative_enhancer	enhancer	3541	1022	203	chrIV:1858232-1858664	putative_enhancer	enhancer	3580	380	105	10	21094	0.0012566
chrIV:1837104-1837604	putative_enhancer	enhancer	3541	1022	203	chrIV:1859332-1859832	putative_enhancer	enhancer	3582	760	161	38	22228	8.81e-11
chrIV:1837104-1837604	putative_enhancer	enhancer	3541	1022	203	chrIV:1866828-1867232	putative_enhancer	enhancer	3597	259	57	8	29676	0.00157059
chrIV:1837104-1837604	putative_enhancer	enhancer	3541	1022	203	chrIV:2083104-2083580	putative_enhancer	enhancer	4015	553	121	6	245988	0.0108316
chrIV:1837104-1837604	putative_enhancer	enhancer	3541	1022	203	chrIV:2785014-2785514	putative_enhancer	enhancer	5381	862	145	6	947910	0.000280181
chrIV:1838541-1839041	putative_enhancer	enhancer	3544	579	113	chrIV:1842256-1842756	putative_enhancer	enhancer	3551	347	102	27	3715	8.81e-11
chrIV:1838541-1839041	putative_enhancer	enhancer	3544	579	113	chrIV:1844993-1845493	putative_enhancer	enhancer	3556	823	189	18	6452	0.000204245
chrIV:1838541-1839041	putative_enhancer	enhancer	3544	579	113	chrIV:1857801-1858232	putative_enhancer	enhancer	3579	1159	260	23	19225	8.81e-11
chrIV:1838541-1839041	putative_enhancer	enhancer	3544	579	113	chrIV:1859332-1859832	putative_enhancer	enhancer	3582	760	161	20	20791	8.81e-11
chrIV:1844993-1845493	putative_enhancer	enhancer	3556	823	189	chrIV:1850827-1851211	putative_enhancer	enhancer	3566	152	42	11	5776	0.0119074
chrIV:1844993-1845493	putative_enhancer	enhancer	3556	823	189	chrIV:1853960-1854460	putative_enhancer	enhancer	3572	341	74	13	8967	0.000461061
chrIV:1844993-1845493	putative_enhancer	enhancer	3556	823	189	chrIV:1857801-1858232	putative_enhancer	enhancer	3579	1159	260	56	12773	8.81e-11
chrIV:1844993-1845493	putative_enhancer	enhancer	3556	823	189	chrIV:1859332-1859832	putative_enhancer	enhancer	3582	760	161	29	14339	8.81e-11
chrIV:1844993-1845493	putative_enhancer	enhancer	3556	823	189	chrIV:1867883-1868383	putative_enhancer	enhancer	3599	358	82	10	22890	0.000424052
chrIV:1844993-1845493	putative_enhancer	enhancer	3556	823	189	chrIV:2083104-2083580	putative_enhancer	enhancer	4015	553	121	6	238099	0.00842498
chrIV:1849230-1849730	putative_enhancer	enhancer	3563	200	62	chrIV:1857801-1858232	putative_enhancer	enhancer	3579	1159	260	17	8536	5.2e-07
chrIV:1850827-1851211	putative_enhancer	enhancer	3566	152	42	chrIV:1857801-1858232	putative_enhancer	enhancer	3579	1159	260	17	6997	6.34e-09
chrIV:1853960-1854460	putative_enhancer	enhancer	3572	341	74	chrIV:1857801-1858232	putative_enhancer	enhancer	3579	1159	260	24	3806	3.74e-07
chrIV:1853960-1854460	putative_enhancer	enhancer	3572	341	74	chrIV:1867883-1868383	putative_enhancer	enhancer	3599	358	82	8	13923	0.0266226
chrIV:1857801-1858232	putative_enhancer	enhancer	3579	1159	260	chrIV:1859332-1859832	putative_enhancer	enhancer	3582	760	161	91	1566	8.81e-11
chrIV:1857801-1858232	putative_enhancer	enhancer	3579	1159	260	chrIV:2603751-2604117	putative_enhancer	enhancer	5033	420	76	6	745918	4.41e-05
chrIV:1859332-1859832	putative_enhancer	enhancer	3582	760	161	chrIV:1866828-1867232	putative_enhancer	enhancer	3597	259	57	12	7448	0.000444389
chrIV:1859332-1859832	putative_enhancer	enhancer	3582	760	161	chrIV:1867883-1868383	putative_enhancer	enhancer	3599	358	82	18	8551	4.75e-09
chrIV:2081440-2081940	putative_enhancer	enhancer	4012	175	54	chrIV:2083104-2083580	putative_enhancer	enhancer	4015	553	121	24	1652	7.25e-06
chrIV:2279794-2280294	putative_enhancer	enhancer	4399	378	64	chrIV:2294617-2295078	putative_enhancer	enhancer	4427	271	77	8	14803	0.0025122
chrIV:2294617-2295078	putative_enhancer	enhancer	4427	271	77	chrIV:2321475-2321975	putative_enhancer	enhancer	4477	383	105	11	26878	2.11e-09
chrIV:2773310-2773810	putative_enhancer	enhancer	5359	355	92	chrIV:2785014-2785514	putative_enhancer	enhancer	5381	862	145	13	11704	0.0017316
chrIV:2785014-2785514	putative_enhancer	enhancer	5381	862	145	chrIV:3234298-3234798	putative_enhancer	enhancer	6251	879	189	7	449284	1.13e-05
chrIV:2950187-2950687	putative_enhancer	enhancer	5704	183	59	chrIV:2997219-2997719	putative_enhancer	enhancer	5795	424	160	6	47032	0.00468283
chrIV:2985692-2986192	putative_enhancer	enhancer	5773	243	76	chrIV:2993192-2993692	putative_enhancer	enhancer	5787	1219	339	13	7500	0.0179023
chrIV:2985692-2986192	putative_enhancer	enhancer	5773	243	76	chrIV:2997219-2997719	putative_enhancer	enhancer	5795	424	160	8	11527	0.0352858
chrIV:2985692-2986192	putative_enhancer	enhancer	5773	243	76	chrIV:3001408-3001908	putative_enhancer	enhancer	5802	593	113	11	15716	3.94e-06
chrIV:2990402-2990902	putative_enhancer	enhancer	5782	819	174	chrIV:2993192-2993692	putative_enhancer	enhancer	5787	1219	339	73	2790	8.81e-11
chrIV:2990402-2990902	putative_enhancer	enhancer	5782	819	174	chrIV:2997219-2997719	putative_enhancer	enhancer	5795	424	160	13	6817	0.00643236
chrIV:2990402-2990902	putative_enhancer	enhancer	5782	819	174	chrIV:3001408-3001908	putative_enhancer	enhancer	5802	593	113	31	11006	8.81e-11
chrIV:2990402-2990902	putative_enhancer	enhancer	5782	819	174	chrIV:3014583-3015083	putative_enhancer	enhancer	5828	395	112	16	24181	8.81e-11
chrIV:2993192-2993692	putative_enhancer	enhancer	5787	1219	339	chrIV:2997219-2997719	putative_enhancer	enhancer	5795	424	160	34	4027	8.81e-11
chrIV:2993192-2993692	putative_enhancer	enhancer	5787	1219	339	chrIV:3001408-3001908	putative_enhancer	enhancer	5802	593	113	30	8216	8.81e-11
chrIV:2993192-2993692	putative_enhancer	enhancer	5787	1219	339	chrIV:3134942-3135442	putative_enhancer	enhancer	6057	565	206	8	141750	6.13e-05
chrIV:2993192-2993692	putative_enhancer	enhancer	5787	1219	339	chrIV:3256787-3257287	putative_enhancer	enhancer	6295	516	84	6	263595	0.0118712
chrIV:3001408-3001908	putative_enhancer	enhancer	5802	593	113	chrIV:3014583-3015083	putative_enhancer	enhancer	5828	395	112	11	13175	0.00160102
chrIV:3001408-3001908	putative_enhancer	enhancer	5802	593	113	chrIV:3168776-3169213	putative_enhancer	enhancer	6122	453	132	6	167336	0.000557659
chrIV:309458-309958	putative_enhancer	enhancer	595	207	89	chrIV:337678-338131	putative_enhancer	enhancer	646	199	54	6	28196	0.00739495
chrIV:3131855-3132249	putative_enhancer	enhancer	6050	283	55	chrIV:3134942-3135442	putative_enhancer	enhancer	6057	565	206	17	3140	2.96e-05
chrIV:3131855-3132249	putative_enhancer	enhancer	6050	283	55	chrIV:3168776-3169213	putative_enhancer	enhancer	6122	453	132	7	36942	0.000552545
chrIV:3134942-3135442	putative_enhancer	enhancer	6057	565	206	chrIV:3168776-3169213	putative_enhancer	enhancer	6122	453	132	19	33802	8.81e-11
chrIV:3134942-3135442	putative_enhancer	enhancer	6057	565	206	chrIV:3192553-3193053	putative_enhancer	enhancer	6170	188	58	6	57611	0.0157008
chrIV:3134942-3135442	putative_enhancer	enhancer	6057	565	206	chrIV:4025847-4026347	putative_enhancer	enhancer	7771	870	168	7	890905	2.83e-08
chrIV:3231612-3232112	putative_enhancer	enhancer	6247	1286	249	chrIV:3234298-3234798	putative_enhancer	enhancer	6251	879	189	60	2686	8.81e-11
chrIV:3231612-3232112	putative_enhancer	enhancer	6247	1286	249	chrIV:3256787-3257287	putative_enhancer	enhancer	6295	516	84	11	25175	0.000474961
chrIV:3231612-3232112	putative_enhancer	enhancer	6247	1286	249	chrIV:3310770-3311217	putative_enhancer	enhancer	6400	354	58	9	79131	3.34e-07
chrIV:3231612-3232112	putative_enhancer	enhancer	6247	1286	249	chrIV:3653403-3653903	putative_enhancer	enhancer	7063	1106	192	6	421791	0.0024489
chrIV:3232591-3233091	putative_enhancer	enhancer	6249	1533	323	chrIV:3234298-3234798	putative_enhancer	enhancer	6251	879	189	76	1707	8.81e-11
chrIV:3232591-3233091	putative_enhancer	enhancer	6249	1533	323	chrIV:3310770-3311217	putative_enhancer	enhancer	6400	354	58	7	78152	0.00373999
chrIV:3232591-3233091	putative_enhancer	enhancer	6249	1533	323	chrIV:4093031-4093531	putative_enhancer	enhancer	7897	1709	362	6	860440	0.0309247
chrIV:3234298-3234798	putative_enhancer	enhancer	6251	879	189	chrIV:3256787-3257287	putative_enhancer	enhancer	6295	516	84	21	22489	8.81e-11
chrIV:3519335-3519835	putative_enhancer	enhancer	6807	837	197	chrIV:3652278-3652762	putative_enhancer	enhancer	7061	716	149	6	132935	0.0135347
chrIV:3548276-3548776	putative_enhancer	enhancer	6861	569	107	chrIV:3611810-3612310	putative_enhancer	enhancer	6984	517	98	7	63534	0.00445959
chrIV:3611810-3612310	putative_enhancer	enhancer	6984	517	98	chrIV:3653403-3653903	putative_enhancer	enhancer	7063	1106	192	11	41593	1.89e-06
chrIV:3652278-3652762	putative_enhancer	enhancer	7061	716	149	chrIV:3653403-3653903	putative_enhancer	enhancer	7063	1106	192	92	1133	8.81e-11
chrIV:372086-372586	putative_enhancer	enhancer	712	313	105	chrIV:377790-378240	putative_enhancer	enhancer	723	347	123	12	5679	0.00347564
chrIV:3814602-3815102	putative_enhancer	enhancer	7375	364	72	chrIV:3823739-3824239	putative_enhancer	enhancer	7390	278	64	12	9137	1.76e-06
chrIV:4017635-4018135	putative_enhancer	enhancer	7757	399	76	chrIV:4019768-4020224	putative_enhancer	enhancer	7760	1372	287	31	2111	7.57e-08
chrIV:4019768-4020224	putative_enhancer	enhancer	7760	1372	287	chrIV:4021808-4022308	putative_enhancer	enhancer	7764	658	107	39	2062	8.81e-11
chrIV:4019768-4020224	putative_enhancer	enhancer	7760	1372	287	chrIV:4022322-4022822	putative_enhancer	enhancer	7765	517	112	31	2576	1.95e-08
chrIV:4019768-4020224	putative_enhancer	enhancer	7760	1372	287	chrIV:4025847-4026347	putative_enhancer	enhancer	7771	870	168	46	6101	8.81e-11
chrIV:4019768-4020224	putative_enhancer	enhancer	7760	1372	287	chrIV:4093031-4093531	putative_enhancer	enhancer	7897	1709	362	19	73285	8.81e-11
chrIV:4021808-4022308	putative_enhancer	enhancer	7764	658	107	chrIV:4025847-4026347	putative_enhancer	enhancer	7771	870	168	21	4039	4.28e-07
chrIV:4021808-4022308	putative_enhancer	enhancer	7764	658	107	chrIV:4093031-4093531	putative_enhancer	enhancer	7897	1709	362	9	71223	0.00206519
chrIV:4022322-4022822	putative_enhancer	enhancer	7765	517	112	chrIV:4025847-4026347	putative_enhancer	enhancer	7771	870	168	16	3525	0.0147028
chrIV:4022322-4022822	putative_enhancer	enhancer	7765	517	112	chrIV:4093031-4093531	putative_enhancer	enhancer	7897	1709	362	8	70709	0.0203816
chrIV:4084650-4085060	putative_enhancer	enhancer	7881	172	47	chrIV:4093031-4093531	putative_enhancer	enhancer	7897	1709	362	17	8426	1.97e-06
chrIV:4093031-4093531	putative_enhancer	enhancer	7897	1709	362	chrIV:4437811-4438245	putative_enhancer	enhancer	8562	483	83	7	344747	0.000339961
chrIV:4093031-4093531	putative_enhancer	enhancer	7897	1709	362	chrIV:4471342-4471842	putative_enhancer	enhancer	8627	763	205	6	378311	0.0154943
chrIV:4385913-4386361	putative_enhancer	enhancer	8461	409	85	chrIV:4473809-4474309	putative_enhancer	enhancer	8632	771	163	6	87922	0.0181852
chrIV:4397041-4397541	putative_enhancer	enhancer	8483	405	71	chrIV:4398375-4398875	putative_enhancer	enhancer	8485	1062	195	28	1334	0.000965188
chrIV:4398375-4398875	putative_enhancer	enhancer	8485	1062	195	chrIV:4399725-4400192	putative_enhancer	enhancer	8487	397	91	29	1333	1.33e-06
chrIV:4398375-4398875	putative_enhancer	enhancer	8485	1062	195	chrIV:4403833-4404206	putative_enhancer	enhancer	8495	484	131	15	5394	6.94e-05
chrIV:4398375-4398875	putative_enhancer	enhancer	8485	1062	195	chrIV:4405080-4405500	putative_enhancer	enhancer	8498	771	140	29	6665	8.81e-11
chrIV:4399259-4399725	putative_enhancer	enhancer	8486	437	108	chrIV:4405080-4405500	putative_enhancer	enhancer	8498	771	140	14	5798	1.28e-05
chrIV:4437811-4438245	putative_enhancer	enhancer	8562	483	83	chrIV:4588326-4588826	putative_enhancer	enhancer	8845	548	92	8	150548	4.93e-07
chrIV:4470241-4470713	putative_enhancer	enhancer	8625	489	112	chrIV:4471342-4471842	putative_enhancer	enhancer	8627	763	205	38	1115	8.81e-11
chrIV:4471342-4471842	putative_enhancer	enhancer	8627	763	205	chrIV:4472778-4473244	putative_enhancer	enhancer	8630	615	135	29	1419	3.54e-07
chrIV:4471342-4471842	putative_enhancer	enhancer	8627	763	205	chrIV:4473809-4474309	putative_enhancer	enhancer	8632	771	163	23	2467	0.000233805
chrIV:4471342-4471842	putative_enhancer	enhancer	8627	763	205	chrIV:4475732-4476133	putative_enhancer	enhancer	8636	263	58	12	4340	0.0121888
chrIV:4472778-4473244	putative_enhancer	enhancer	8630	615	135	chrIV:4473809-4474309	putative_enhancer	enhancer	8632	771	163	54	1048	8.81e-11
chrIV:4472778-4473244	putative_enhancer	enhancer	8630	615	135	chrIV:4477985-4478386	putative_enhancer	enhancer	8640	397	76	11	5174	0.00595275
chrIV:4637752-4638252	putative_enhancer	enhancer	8941	335	70	chrIV:4667116-4667616	putative_enhancer	enhancer	8999	330	73	8	29364	0.000162809
chrIV:5076496-5076996	putative_enhancer	enhancer	9789	409	78	chrIV:5078787-5079287	putative_enhancer	enhancer	9792	457	116	18	2291	0.0019004
chrIV:5134749-5135249	putative_enhancer	enhancer	9898	541	97	chrIV:5136419-5136919	putative_enhancer	enhancer	9901	595	122	37	1670	8.81e-11
chrIV:5580896-5581327	putative_enhancer	enhancer	10752	503	92	chrIV:5593747-5594247	putative_enhancer	enhancer	10775	1138	230	12	12886	0.00203887
chrIV:5590100-5590600	putative_enhancer	enhancer	10769	879	157	chrIV:5593747-5594247	putative_enhancer	enhancer	10775	1138	230	37	3647	8.81e-11
chrIV:5590100-5590600	putative_enhancer	enhancer	10769	879	157	chrIV:5598404-5598904	putative_enhancer	enhancer	10783	591	142	13	8304	0.00147921
chrIV:5590100-5590600	putative_enhancer	enhancer	10769	879	157	chrIV:5604358-5604858	putative_enhancer	enhancer	10793	851	198	17	14258	6.96e-09
chrIV:5591071-5591571	putative_enhancer	enhancer	10771	836	126	chrIV:5593747-5594247	putative_enhancer	enhancer	10775	1138	230	40	2676	8.81e-11
chrIV:5591071-5591571	putative_enhancer	enhancer	10771	836	126	chrIV:5598404-5598904	putative_enhancer	enhancer	10783	591	142	21	7333	8.81e-11
chrIV:5591071-5591571	putative_enhancer	enhancer	10771	836	126	chrIV:5604358-5604858	putative_enhancer	enhancer	10793	851	198	13	13287	0.000199776
chrIV:5591071-5591571	putative_enhancer	enhancer	10771	836	126	chrIV:5654084-5654584	putative_enhancer	enhancer	10888	582	92	8	63013	3.05e-05
chrIV:5593747-5594247	putative_enhancer	enhancer	10775	1138	230	chrIV:5598404-5598904	putative_enhancer	enhancer	10783	591	142	26	4657	8.81e-11
chrIV:5593747-5594247	putative_enhancer	enhancer	10775	1138	230	chrIV:5604358-5604858	putative_enhancer	enhancer	10793	851	198	19	10611	1.67e-07
chrIV:5593747-5594247	putative_enhancer	enhancer	10775	1138	230	chrIV:5605151-5605651	putative_enhancer	enhancer	10794	457	115	12	11404	0.00612694
chrIV:5593747-5594247	putative_enhancer	enhancer	10775	1138	230	chrIV:5764300-5764800	putative_enhancer	enhancer	11093	597	120	6	170553	0.00540437
chrIV:5598404-5598904	putative_enhancer	enhancer	10783	591	142	chrIV:5604358-5604858	putative_enhancer	enhancer	10793	851	198	14	5954	0.00589558
chrIV:5603266-5603766	putative_enhancer	enhancer	10791	328	84	chrIV:5604358-5604858	putative_enhancer	enhancer	10793	851	198	27	1092	0.00147202
chrIV:5604358-5604858	putative_enhancer	enhancer	10793	851	198	chrIV:6097034-6097495	putative_enhancer	enhancer	11720	2218	426	6	492656	0.0135549
chrIV:5654084-5654584	putative_enhancer	enhancer	10888	582	92	chrIV:5656665-5657026	putative_enhancer	enhancer	10893	315	61	23	2511	8.81e-11
chrIV:5654084-5654584	putative_enhancer	enhancer	10888	582	92	chrIV:5659371-5659861	putative_enhancer	enhancer	10898	811	124	20	5282	2.64e-09
chrIV:5657394-5657810	putative_enhancer	enhancer	10895	631	135	chrIV:5659371-5659861	putative_enhancer	enhancer	10898	811	124	25	2014	5.5e-07
chrIV:5659371-5659861	putative_enhancer	enhancer	10898	811	124	chrIV:5664665-5665068	putative_enhancer	enhancer	10907	529	103	17	5250	2.79e-06
chrIV:5700219-5700601	putative_enhancer	enhancer	10976	264	63	chrIV:5747378-5747878	putative_enhancer	enhancer	11064	423	70	6	47218	0.00613142
chrIV:5754747-5755247	putative_enhancer	enhancer	11076	449	111	chrIV:5764300-5764800	putative_enhancer	enhancer	11093	597	120	12	9553	1.39e-05
chrIV:5754747-5755247	putative_enhancer	enhancer	11076	449	111	chrIV:5780284-5780784	putative_enhancer	enhancer	11123	438	57	8	25537	0.000581006
chrIV:5755853-5756335	putative_enhancer	enhancer	11078	534	107	chrIV:5762686-5763186	putative_enhancer	enhancer	11090	693	119	27	6842	8.81e-11
chrIV:5762686-5763186	putative_enhancer	enhancer	11090	693	119	chrIV:5764300-5764800	putative_enhancer	enhancer	11093	597	120	40	1614	8.81e-11
chrIV:5762686-5763186	putative_enhancer	enhancer	11090	693	119	chrIV:5765632-5766097	putative_enhancer	enhancer	11095	600	100	27	2928	8.81e-11
chrIV:5762686-5763186	putative_enhancer	enhancer	11090	693	119	chrIV:5778324-5778762	putative_enhancer	enhancer	11120	660	106	19	15607	8.81e-11
chrIV:5762686-5763186	putative_enhancer	enhancer	11090	693	119	chrIV:5780284-5780784	putative_enhancer	enhancer	11123	438	57	14	17598	3.52e-10
chrIV:5764300-5764800	putative_enhancer	enhancer	11093	597	120	chrIV:5765632-5766097	putative_enhancer	enhancer	11095	600	100	30	1314	5.36e-08
chrIV:5764300-5764800	putative_enhancer	enhancer	11093	597	120	chrIV:5778324-5778762	putative_enhancer	enhancer	11120	660	106	23	13993	8.81e-11
chrIV:5764300-5764800	putative_enhancer	enhancer	11093	597	120	chrIV:5780284-5780784	putative_enhancer	enhancer	11123	438	57	10	15984	0.000191052
chrIV:5765632-5766097	putative_enhancer	enhancer	11095	600	100	chrIV:5778324-5778762	putative_enhancer	enhancer	11120	660	106	13	12679	2.93e-06
chrIV:5778324-5778762	putative_enhancer	enhancer	11120	660	106	chrIV:5780284-5780784	putative_enhancer	enhancer	11123	438	57	21	1991	0.0013819
chrIV:5940311-5940644	putative_enhancer	enhancer	11427	330	65	chrIV:5973943-5974443	putative_enhancer	enhancer	11489	996	275	8	33716	0.0106315
chrIV:5973943-5974443	putative_enhancer	enhancer	11489	996	275	chrIV:5986790-5987286	putative_enhancer	enhancer	11511	418	124	16	12845	3.46e-07
chrIV:5973943-5974443	putative_enhancer	enhancer	11489	996	275	chrIV:6097034-6097495	putative_enhancer	enhancer	11720	2218	426	10	123071	0.00177834
chrIV:5986790-5987286	putative_enhancer	enhancer	11511	418	124	chrIV:6097034-6097495	putative_enhancer	enhancer	11720	2218	426	9	110226	2.6e-05
chrIV:6026033-6026533	putative_enhancer	enhancer	11587	239	49	chrIV:6032356-6032856	putative_enhancer	enhancer	11599	354	93	14	6323	5.25e-06
chrIV:6026943-6027443	putative_enhancer	enhancer	11588	358	73	chrIV:6032356-6032856	putative_enhancer	enhancer	11599	354	93	16	5413	2.24e-06
chrIV:6054201-6054701	putative_enhancer	enhancer	11640	428	81	chrIV:6097034-6097495	putative_enhancer	enhancer	11720	2218	426	12	42813	0.000186833
chrIV:6086435-6086935	putative_enhancer	enhancer	11702	273	42	chrIV:6097034-6097495	putative_enhancer	enhancer	11720	2218	426	14	10579	0.00115631
chrIV:6097034-6097495	putative_enhancer	enhancer	11720	2218	426	chrIV:6099677-6100177	putative_enhancer	enhancer	11725	700	103	66	2663	8.81e-11
chrIV:6097495-6097956	putative_enhancer	enhancer	11721	1078	136	chrIV:6099677-6100177	putative_enhancer	enhancer	11725	700	103	50	2202	8.81e-11
chrIV:6574220-6574720	putative_enhancer	enhancer	12643	973	163	chrIV:6575946-6576446	putative_enhancer	enhancer	12645	247	81	22	1726	0.00655633
chrIV:6750075-6750575	putative_enhancer	enhancer	12982	308	69	chrIV:6751165-6751665	putative_enhancer	enhancer	12984	340	83	31	1090	9.69e-10
chrIV:6878843-6879338	putative_enhancer	enhancer	13228	541	81	chrIV:6881118-6881618	putative_enhancer	enhancer	13232	691	131	32	2278	3.17e-09
chrIV:6878843-6879338	putative_enhancer	enhancer	13228	541	81	chrIV:6882503-6883003	putative_enhancer	enhancer	13234	345	68	17	3663	2.77e-05
chrIV:7046973-7047412	putative_enhancer	enhancer	13552	465	112	chrIV:7049563-7050063	putative_enhancer	enhancer	13555	917	198	22	2621	6.71e-06
chrIV:7095361-7095861	putative_enhancer	enhancer	13645	832	169	chrIV:7098453-7098953	putative_enhancer	enhancer	13650	449	121	24	3092	1.6e-05
chrIV:740597-741097	putative_enhancer	enhancer	1424	320	86	chrIV:746243-746743	putative_enhancer	enhancer	1435	263	84	13	5646	0.000356052
chrIV:8009252-8009662	putative_enhancer	enhancer	15388	408	100	chrIV:8067772-8068164	putative_enhancer	enhancer	15495	664	209	6	58511	0.0496153
chrIV:8067772-8068164	putative_enhancer	enhancer	15495	664	209	chrIV:8068793-8069218	putative_enhancer	enhancer	15497	291	106	25	1037	2.82e-05
chrIV:8068219-8068719	putative_enhancer	enhancer	15496	368	110	chrIV:8079908-8080320	putative_enhancer	enhancer	15519	249	77	12	11645	1.43e-07
chrIV:8142751-8143251	putative_enhancer	enhancer	15639	513	134	chrIV:8146139-8146639	putative_enhancer	enhancer	15645	644	163	25	3388	2.55e-07
chrIV:8313637-8314137	putative_enhancer	enhancer	15962	429	105	chrIV:8316516-8317016	putative_enhancer	enhancer	15967	231	65	14	2879	0.00246418
chrIV:8313637-8314137	putative_enhancer	enhancer	15962	429	105	chrIV:8317730-8318230	putative_enhancer	enhancer	15969	327	72	13	4093	0.0241998
chrIV:8525901-8526401	putative_enhancer	enhancer	16375	853	166	chrIV:8531484-8531872	putative_enhancer	enhancer	16385	251	46	16	5527	6.88e-08
chrIV:8758565-8759065	putative_enhancer	enhancer	16825	481	108	chrIV:8762394-8762894	putative_enhancer	enhancer	16832	519	137	22	3829	9.78e-08
chrIV:9257273-9257773	putative_enhancer	enhancer	17774	454	100	chrIV:9258506-9259006	putative_enhancer	enhancer	17776	461	80	41	1233	8.81e-11
chrIV:9666959-9667387	putative_enhancer	enhancer	18566	418	92	chrIV:9669911-9670411	putative_enhancer	enhancer	18571	699	189	20	2988	3.87e-07
chrIV:9669911-9670411	putative_enhancer	enhancer	18571	699	189	chrIV:9677129-9677577	putative_enhancer	enhancer	18585	607	125	13	7192	0.000246188
chrIV:9670918-9671344	putative_enhancer	enhancer	18573	856	152	chrIV:9677129-9677577	putative_enhancer	enhancer	18585	607	125	17	6222	3.26e-06
chrIV:9672396-9672896	putative_enhancer	enhancer	18576	399	107	chrIV:9677129-9677577	putative_enhancer	enhancer	18585	607	125	13	4707	0.000674728
chrIV:9716391-9716891	putative_enhancer	enhancer	18662	742	144	chrIV:9872665-9873165	putative_enhancer	enhancer	18964	817	188	7	156274	0.00203673
chrIV:9913037-9913537	putative_enhancer	enhancer	19040	326	77	chrIV:9917895-9918395	putative_enhancer	enhancer	19049	331	63	13	4858	0.00458029
chrIV:9946572-9947072	putative_enhancer	enhancer	19104	249	57	chrIV:9947937-9948437	putative_enhancer	enhancer	19106	414	111	27	1365	1.54e-08
chrIV:9947937-9948437	putative_enhancer	enhancer	19106	414	111	chrIV:9952881-9953381	putative_enhancer	enhancer	19115	333	76	16	4944	5.55e-06
chrV:10043128-10043606	putative_enhancer	enhancer	19347	757	175	chrV:10046415-10046915	putative_enhancer	enhancer	19352	517	122	18	3298	0.000795715
chrV:10043128-10043606	putative_enhancer	enhancer	19347	757	175	chrV:10246908-10247332	putative_enhancer	enhancer	19734	804	188	6	203753	0.00371005
chrV:10246908-10247332	putative_enhancer	enhancer	19734	804	188	chrV:10248517-10248929	putative_enhancer	enhancer	19738	304	75	22	1603	0.00165362
chrV:10528479-10528979	putative_enhancer	enhancer	20269	384	73	chrV:10529502-10530002	putative_enhancer	enhancer	20271	372	86	34	1023	1.04e-10
chrV:10710963-10711463	putative_enhancer	enhancer	20611	255	68	chrV:10726628-10727113	putative_enhancer	enhancer	20642	648	99	7	15657	0.0272491
chrV:10719724-10720178	putative_enhancer	enhancer	20629	766	176	chrV:10722148-10722590	putative_enhancer	enhancer	20634	806	192	21	2418	1.78e-05
chrV:10719724-10720178	putative_enhancer	enhancer	20629	766	176	chrV:10726628-10727113	putative_enhancer	enhancer	20642	648	99	12	6919	0.00136017
chrV:10720265-10720742	putative_enhancer	enhancer	20630	333	74	chrV:10722148-10722590	putative_enhancer	enhancer	20634	806	192	18	1866	3.28e-05
chrV:10722607-10723107	putative_enhancer	enhancer	20635	533	157	chrV:10726628-10727113	putative_enhancer	enhancer	20642	648	99	15	4013	4.29e-05
chrV:10726628-10727113	putative_enhancer	enhancer	20642	648	99	chrV:10729348-10729792	putative_enhancer	enhancer	20647	601	87	23	2700	9.33e-10
chrV:10727611-10728111	putative_enhancer	enhancer	20644	531	115	chrV:10731083-10731495	putative_enhancer	enhancer	20650	391	86	20	3428	1.04e-10
chrV:10729348-10729792	putative_enhancer	enhancer	20647	601	87	chrV:10859757-10860257	putative_enhancer	enhancer	20895	686	160	6	130437	0.00083787
chrV:10857104-10857604	putative_enhancer	enhancer	20891	982	255	chrV:10858410-10858873	putative_enhancer	enhancer	20893	1067	295	68	1287	1.04e-10
chrV:10857104-10857604	putative_enhancer	enhancer	20891	982	255	chrV:10859757-10860257	putative_enhancer	enhancer	20895	686	160	28	2653	1.05e-08
chrV:10859757-10860257	putative_enhancer	enhancer	20895	686	160	chrV:10869886-10870386	putative_enhancer	enhancer	20914	603	170	11	10129	0.00397551
chrV:10859757-10860257	putative_enhancer	enhancer	20895	686	160	chrV:10877789-10878250	putative_enhancer	enhancer	20927	512	121	8	18012	0.0102822
chrV:10859757-10860257	putative_enhancer	enhancer	20895	686	160	chrV:11069231-11069731	putative_enhancer	enhancer	21290	447	87	7	209474	6.44e-07
chrV:11008977-11009477	putative_enhancer	enhancer	21176	427	75	chrV:11069231-11069731	putative_enhancer	enhancer	21290	447	87	6	60254	0.00580223
chrV:11404904-11405350	putative_enhancer	enhancer	21932	202	53	chrV:11470151-11470651	putative_enhancer	enhancer	22057	431	78	7	65274	1.1e-05
chrV:1151794-1152294	putative_enhancer	enhancer	2232	478	153	chrV:1153392-1153866	putative_enhancer	enhancer	2235	353	113	22	1585	4.47e-05
chrV:11677905-11678398	putative_enhancer	enhancer	22452	258	40	chrV:11680262-11680734	putative_enhancer	enhancer	22456	367	85	12	2347	0.0268517
chrV:11801399-11801865	putative_enhancer	enhancer	22687	500	100	chrV:11802415-11802915	putative_enhancer	enhancer	22689	671	176	35	1033	4.19e-08
chrV:11802415-11802915	putative_enhancer	enhancer	22689	671	176	chrV:11823929-11824429	putative_enhancer	enhancer	22729	928	245	11	21514	0.000209086
chrV:11823929-11824429	putative_enhancer	enhancer	22729	928	245	chrV:11885880-11886380	putative_enhancer	enhancer	22844	590	138	10	61951	3.09e-07
chrV:11883054-11883554	putative_enhancer	enhancer	22839	431	100	chrV:11885880-11886380	putative_enhancer	enhancer	22844	590	138	16	2826	0.0150743
chrV:11916473-11916920	putative_enhancer	enhancer	22903	313	55	chrV:11922774-11923274	putative_enhancer	enhancer	22915	322	97	9	6328	0.0468501
chrV:12533349-12533815	putative_enhancer	enhancer	24080	367	117	chrV:12542840-12543340	putative_enhancer	enhancer	24099	424	97	11	9508	1.02e-07
chrV:12554143-12554643	putative_enhancer	enhancer	24120	478	116	chrV:12555772-12556272	putative_enhancer	enhancer	24123	420	108	25	1629	1.11e-08
chrV:12554143-12554643	putative_enhancer	enhancer	24120	478	116	chrV:12556774-12557274	putative_enhancer	enhancer	24125	411	103	16	2631	8.2e-05
chrV:12555772-12556272	putative_enhancer	enhancer	24123	420	108	chrV:12556774-12557274	putative_enhancer	enhancer	24125	411	103	28	1002	1.14e-07
chrV:12637707-12638130	putative_enhancer	enhancer	24283	421	84	chrV:12638721-12639221	putative_enhancer	enhancer	24285	311	76	19	1053	0.0336859
chrV:12896794-12897294	putative_enhancer	enhancer	24779	273	92	chrV:12899401-12899880	putative_enhancer	enhancer	24784	323	79	14	2596	0.00304619
chrV:13046083-13046583	putative_enhancer	enhancer	25067	309	77	chrV:13049075-13049575	putative_enhancer	enhancer	25071	406	74	19	2992	3.53e-09
chrV:13082547-13083047	putative_enhancer	enhancer	25136	1005	240	chrV:13088809-13089222	putative_enhancer	enhancer	25148	319	94	14	6218	7.26e-05
chrV:13168696-13169132	putative_enhancer	enhancer	25299	693	157	chrV:13173623-13174123	putative_enhancer	enhancer	25309	431	64	14	4959	0.0051431
chrV:13212520-13213020	putative_enhancer	enhancer	25385	519	66	chrV:13262645-13263054	putative_enhancer	enhancer	25480	417	58	6	50079	0.0247374
chrV:13212520-13213020	putative_enhancer	enhancer	25385	519	66	chrV:13311847-13312294	putative_enhancer	enhancer	25570	174	53	6	99300	0.000138012
chrV:13262645-13263054	putative_enhancer	enhancer	25480	417	58	chrV:13369518-13370018	putative_enhancer	enhancer	25681	613	101	7	106919	3.81e-06
chrV:13376515-13377015	putative_enhancer	enhancer	25694	430	112	chrV:13413295-13413795	putative_enhancer	enhancer	25763	443	74	7	36780	0.000352
chrV:13392891-13393325	putative_enhancer	enhancer	25725	366	103	chrV:13396336-13396836	putative_enhancer	enhancer	25732	586	148	17	3478	5.72e-07
chrV:13411695-13412195	putative_enhancer	enhancer	25760	372	78	chrV:13413295-13413795	putative_enhancer	enhancer	25763	443	74	25	1600	1.04e-10
chrV:13419768-13420259	putative_enhancer	enhancer	25775	381	93	chrV:13421619-13422119	putative_enhancer	enhancer	25778	363	85	18	1856	0.00157813
chrV:13656576-13656957	putative_enhancer	enhancer	26229	687	147	chrV:13658529-13659029	putative_enhancer	enhancer	26232	813	208	26	2013	2.07e-07
chrV:13982809-13983309	putative_enhancer	enhancer	26855	272	53	chrV:13986740-13987240	putative_enhancer	enhancer	26863	412	69	21	3931	1.04e-10
chrV:14003626-14004126	putative_enhancer	enhancer	26895	500	151	chrV:14006781-14007281	putative_enhancer	enhancer	26901	549	125	21	3155	1.54e-05
chrV:14004294-14004794	putative_enhancer	enhancer	26896	438	115	chrV:14006781-14007281	putative_enhancer	enhancer	26901	549	125	22	2487	6e-06
chrV:14006781-14007281	putative_enhancer	enhancer	26901	549	125	chrV:14055000-14055500	putative_enhancer	enhancer	26995	1056	150	10	48219	3.36e-05
chrV:14055000-14055500	putative_enhancer	enhancer	26995	1056	150	chrV:14136075-14136575	putative_enhancer	enhancer	27153	1553	374	12	81075	6.11e-07
chrV:14132536-14132917	putative_enhancer	enhancer	27145	244	64	chrV:14136075-14136575	putative_enhancer	enhancer	27153	1553	374	18	3599	8.37e-06
chrV:14133351-14133702	putative_enhancer	enhancer	27147	468	102	chrV:14136075-14136575	putative_enhancer	enhancer	27153	1553	374	35	2799	1.04e-10
chrV:14133702-14134131	putative_enhancer	enhancer	27148	332	89	chrV:14136075-14136575	putative_enhancer	enhancer	27153	1553	374	27	2409	3.35e-06
chrV:14134685-14135080	putative_enhancer	enhancer	27150	359	101	chrV:14136075-14136575	putative_enhancer	enhancer	27153	1553	374	38	1443	2.49e-09
chrV:14136075-14136575	putative_enhancer	enhancer	27153	1553	374	chrV:14139327-14139720	putative_enhancer	enhancer	27158	590	155	71	3198	1.04e-10
chrV:14136075-14136575	putative_enhancer	enhancer	27153	1553	374	chrV:14143510-14144010	putative_enhancer	enhancer	27166	443	143	18	7435	0.000714069
chrV:14212754-14213254	putative_enhancer	enhancer	27299	632	95	chrV:14231598-14232098	putative_enhancer	enhancer	27334	636	96	16	18844	2.07e-10
chrV:14495415-14495915	putative_enhancer	enhancer	27837	419	98	chrV:14510664-14511164	putative_enhancer	enhancer	27867	564	95	12	15249	6.92e-07
chrV:14501096-14501596	putative_enhancer	enhancer	27847	403	99	chrV:14504655-14505155	putative_enhancer	enhancer	27853	596	118	16	3559	0.000928749
chrV:14501890-14502390	putative_enhancer	enhancer	27848	483	86	chrV:14503098-14503512	putative_enhancer	enhancer	27850	671	113	21	1165	0.0180547
chrV:14506028-14506411	putative_enhancer	enhancer	27856	402	106	chrV:14510664-14511164	putative_enhancer	enhancer	27867	564	95	14	4695	5.71e-05
chrV:14573026-14573526	putative_enhancer	enhancer	27989	231	51	chrV:14576615-14577041	putative_enhancer	enhancer	27996	221	48	13	3552	8.99e-06
chrV:14616337-14616837	putative_enhancer	enhancer	28073	264	61	chrV:14618631-14619131	putative_enhancer	enhancer	28077	298	65	21	2294	8.3e-10
chrV:14616337-14616837	putative_enhancer	enhancer	28073	264	61	chrV:14625558-14626058	putative_enhancer	enhancer	28090	321	63	10	9221	0.000157077
chrV:14618631-14619131	putative_enhancer	enhancer	28077	298	65	chrV:14625558-14626058	putative_enhancer	enhancer	28090	321	63	16	6927	1.04e-10
chrV:14806240-14806740	putative_enhancer	enhancer	28437	455	83	chrV:14824101-14824601	putative_enhancer	enhancer	28468	211	47	8	17861	0.00163416
chrV:14848471-14848898	putative_enhancer	enhancer	28516	487	102	chrV:14850484-14850984	putative_enhancer	enhancer	28519	453	84	19	2050	0.000394126
chrV:15070931-15071328	putative_enhancer	enhancer	28945	508	140	chrV:15074807-15075307	putative_enhancer	enhancer	28953	394	136	16	3928	0.00151602
chrV:1512132-1512587	putative_enhancer	enhancer	2922	204	57	chrV:1515106-1515606	putative_enhancer	enhancer	2928	180	47	11	2997	0.0297502
chrV:16605388-16605888	putative_enhancer	enhancer	31935	280	40	chrV:16610004-16610504	putative_enhancer	enhancer	31944	331	46	16	4616	1.48e-05
chrV:16774394-16774894	putative_enhancer	enhancer	32262	355	82	chrV:16778538-16778957	putative_enhancer	enhancer	32269	271	73	13	4103	0.00979751
chrV:16774394-16774894	putative_enhancer	enhancer	32262	355	82	chrV:16778957-16779376	putative_enhancer	enhancer	32270	273	58	12	4522	0.0122008
chrV:16778957-16779376	putative_enhancer	enhancer	32270	273	58	chrV:16779985-16780387	putative_enhancer	enhancer	32272	211	72	20	1020	8.6e-07
chrV:17662213-17662684	putative_enhancer	enhancer	34000	444	69	chrV:17721671-17722171	putative_enhancer	enhancer	34115	466	73	11	59473	4.15e-10
chrV:17662213-17662684	putative_enhancer	enhancer	34000	444	69	chrV:17754872-17755372	putative_enhancer	enhancer	34179	248	43	6	92674	0.00149332
chrV:17728747-17729247	putative_enhancer	enhancer	34128	238	79	chrV:17732383-17732883	putative_enhancer	enhancer	34135	224	37	18	3636	2.77e-08
chrV:19351944-19352444	putative_enhancer	enhancer	37286	378	131	chrV:19357938-19358438	putative_enhancer	enhancer	37296	212	55	17	5994	1.14e-09
chrV:19351944-19352444	putative_enhancer	enhancer	37286	378	131	chrV:19529098-19529598	putative_enhancer	enhancer	37619	1252	323	9	177154	8.98e-07
chrV:1940418-1940918	putative_enhancer	enhancer	3749	255	91	chrV:1943478-1943978	putative_enhancer	enhancer	3755	375	160	22	3060	1.87e-09
chrV:19521625-19522034	putative_enhancer	enhancer	37606	331	110	chrV:19529098-19529598	putative_enhancer	enhancer	37619	1252	323	21	7519	1.66e-09
chrV:19521625-19522034	putative_enhancer	enhancer	37606	331	110	chrV:19533400-19533900	putative_enhancer	enhancer	37627	362	75	12	11821	9.09e-08
chrV:19529098-19529598	putative_enhancer	enhancer	37619	1252	323	chrV:19533400-19533900	putative_enhancer	enhancer	37627	362	75	41	4302	1.04e-10
chrV:19529098-19529598	putative_enhancer	enhancer	37619	1252	323	chrV:19666281-19666781	putative_enhancer	enhancer	37890	215	50	6	137183	0.0101461
chrV:19620023-19620520	putative_enhancer	enhancer	37799	494	125	chrV:20249620-20250104	putative_enhancer	enhancer	39027	485	225	6	629591	1.35e-05
chrV:19672421-19672823	putative_enhancer	enhancer	37902	294	55	chrV:20021300-20021742	putative_enhancer	enhancer	38583	205	66	8	348899	1.04e-10
chrV:20370675-20371175	putative_enhancer	enhancer	39261	190	51	chrV:20374377-20374877	putative_enhancer	enhancer	39268	273	48	14	3702	2.43e-06
chrV:20372104-20372591	putative_enhancer	enhancer	39264	229	57	chrV:20374377-20374877	putative_enhancer	enhancer	39268	273	48	15	2280	0.000241015
chrV:20372104-20372591	putative_enhancer	enhancer	39264	229	57	chrV:20418686-20419167	putative_enhancer	enhancer	39352	766	254	9	46579	8.32e-07
chrV:20374377-20374877	putative_enhancer	enhancer	39268	273	48	chrV:20418686-20419167	putative_enhancer	enhancer	39352	766	254	8	44299	0.000117163
chrV:20408972-20409419	putative_enhancer	enhancer	39334	212	78	chrV:20416749-20417154	putative_enhancer	enhancer	39348	326	112	10	7756	2.75e-05
chrV:20416749-20417154	putative_enhancer	enhancer	39348	326	112	chrV:20418686-20419167	putative_enhancer	enhancer	39352	766	254	18	1975	0.0214006
chrV:20418686-20419167	putative_enhancer	enhancer	39352	766	254	chrV:20423424-20423725	putative_enhancer	enhancer	39363	370	81	30	4648	1.04e-10
chrV:20711633-20712133	putative_enhancer	enhancer	39915	562	189	chrV:20728852-20729352	putative_enhancer	enhancer	39948	795	222	13	17219	1.74e-05
chrV:20728852-20729352	putative_enhancer	enhancer	39948	795	222	chrV:20778755-20779255	putative_enhancer	enhancer	40044	588	203	8	49903	0.00378563
chrV:20754132-20754567	putative_enhancer	enhancer	39997	265	80	chrV:20755386-20755886	putative_enhancer	enhancer	39999	299	94	23	1287	1.02e-06
chrV:20903629-20904117	putative_enhancer	enhancer	40280	439	112	chrV:20920293-20920793	putative_enhancer	enhancer	40312	243	100	13	16670	1.24e-09
chrV:2262063-2262563	putative_enhancer	enhancer	4364	129	40	chrV:2294614-2295114	putative_enhancer	enhancer	4426	325	74	6	32551	0.00203011
chrV:2675741-2676241	putative_enhancer	enhancer	5175	397	118	chrV:2681282-2681782	putative_enhancer	enhancer	5185	245	61	12	5541	0.000737482
chrV:2801939-2802439	putative_enhancer	enhancer	5420	243	66	chrV:2803075-2803575	putative_enhancer	enhancer	5422	346	87	27	1136	1.66e-08
chrV:281066-281566	putative_enhancer	enhancer	539	276	95	chrV:282852-283352	putative_enhancer	enhancer	542	203	64	15	1786	0.00919272
chrV:281066-281566	putative_enhancer	enhancer	539	276	95	chrV:284757-285257	putative_enhancer	enhancer	546	305	132	27	3691	1.04e-10
chrV:3357222-3357614	putative_enhancer	enhancer	6503	230	53	chrV:3409478-3409978	putative_enhancer	enhancer	6603	239	44	6	52310	0.00143143
chrV:3580366-3580866	putative_enhancer	enhancer	6934	408	86	chrV:3634641-3635062	putative_enhancer	enhancer	7041	399	88	6	54235	0.00942321
chrV:3692531-3692951	putative_enhancer	enhancer	7155	350	55	chrV:3702954-3703454	putative_enhancer	enhancer	7175	586	102	15	10463	2.07e-10
chrV:4499477-4499914	putative_enhancer	enhancer	8716	687	204	chrV:4505432-4505868	putative_enhancer	enhancer	8726	322	84	12	5955	0.000244795
chrV:4499477-4499914	putative_enhancer	enhancer	8716	687	204	chrV:4507705-4508132	putative_enhancer	enhancer	8730	1168	275	37	8223	1.04e-10
chrV:4499477-4499914	putative_enhancer	enhancer	8716	687	204	chrV:4508132-4508559	putative_enhancer	enhancer	8731	662	162	14	8650	8.51e-05
chrV:4502592-4503092	putative_enhancer	enhancer	8721	421	112	chrV:4507705-4508132	putative_enhancer	enhancer	8730	1168	275	22	5076	1.04e-08
chrV:4502592-4503092	putative_enhancer	enhancer	8721	421	112	chrV:4523742-4524240	putative_enhancer	enhancer	8761	328	101	8	21149	0.000181665
chrV:4503343-4503843	putative_enhancer	enhancer	8722	222	69	chrV:4507705-4508132	putative_enhancer	enhancer	8730	1168	275	16	4325	0.000266534
chrV:4506564-4507056	putative_enhancer	enhancer	8728	307	76	chrV:4507705-4508132	putative_enhancer	enhancer	8730	1168	275	27	1108	0.00571653
chrV:4507705-4508132	putative_enhancer	enhancer	8730	1168	275	chrV:4524299-4524799	putative_enhancer	enhancer	8762	407	95	11	16631	0.000111482
chrV:4507705-4508132	putative_enhancer	enhancer	8730	1168	275	chrV:4526702-4527088	putative_enhancer	enhancer	8767	335	95	10	18977	0.000915876
chrV:4508132-4508559	putative_enhancer	enhancer	8731	662	162	chrV:4523742-4524240	putative_enhancer	enhancer	8761	328	101	16	15646	1.04e-10
chrV:4523257-4523742	putative_enhancer	enhancer	8760	273	68	chrV:4524299-4524799	putative_enhancer	enhancer	8762	407	95	23	1050	2.2e-07
chrV:4523742-4524240	putative_enhancer	enhancer	8761	328	101	chrV:4526702-4527088	putative_enhancer	enhancer	8767	335	95	20	2904	1.04e-10
chrV:4523742-4524240	putative_enhancer	enhancer	8761	328	101	chrV:4527492-4527992	putative_enhancer	enhancer	8769	293	63	14	3751	5.02e-05
chrV:4810605-4811105	putative_enhancer	enhancer	9309	481	102	chrV:4860545-4860940	putative_enhancer	enhancer	9406	531	128	8	49887	0.000738611
chrV:4844546-4845046	putative_enhancer	enhancer	9375	802	140	chrV:4860545-4860940	putative_enhancer	enhancer	9406	531	128	15	15946	9.73e-07
chrV:4965007-4965374	putative_enhancer	enhancer	9608	356	57	chrV:4969430-4969892	putative_enhancer	enhancer	9616	327	41	14	4471	6.53e-05
chrV:5026336-5026733	putative_enhancer	enhancer	9726	368	57	chrV:5030186-5030686	putative_enhancer	enhancer	9734	412	76	13	3902	0.0302705
chrV:5412225-5412725	putative_enhancer	enhancer	10470	342	55	chrV:5424983-5425483	putative_enhancer	enhancer	10494	570	97	9	12758	0.0275605
chrV:5558346-5558798	putative_enhancer	enhancer	10750	427	107	chrV:5559811-5560311	putative_enhancer	enhancer	10753	484	104	31	1489	1.04e-10
chrV:5697526-5697965	putative_enhancer	enhancer	11018	418	72	chrV:5701046-5701546	putative_enhancer	enhancer	11025	466	102	13	3551	0.0140927
chrV:5701046-5701546	putative_enhancer	enhancer	11025	466	102	chrV:5768172-5768672	putative_enhancer	enhancer	11153	1355	212	7	67126	0.01506
chrV:5706978-5707478	putative_enhancer	enhancer	11036	516	117	chrV:5712097-5712597	putative_enhancer	enhancer	11045	290	53	15	5119	0.000130917
chrV:5768172-5768672	putative_enhancer	enhancer	11153	1355	212	chrV:5822906-5823406	putative_enhancer	enhancer	11258	624	111	13	54734	6.22e-10
chrV:5768172-5768672	putative_enhancer	enhancer	11153	1355	212	chrV:5832701-5833201	putative_enhancer	enhancer	11277	400	81	7	64529	0.0183594
chrV:5820373-5820873	putative_enhancer	enhancer	11254	311	65	chrV:5821677-5822177	putative_enhancer	enhancer	11256	432	73	22	1304	3.71e-06
chrV:5822906-5823406	putative_enhancer	enhancer	11258	624	111	chrV:5832701-5833201	putative_enhancer	enhancer	11277	400	81	17	9795	1.04e-10
chrV:5843370-5843861	putative_enhancer	enhancer	11295	576	122	chrV:5844810-5845198	putative_enhancer	enhancer	11298	306	75	22	1389	5.8e-06
chrV:5843370-5843861	putative_enhancer	enhancer	11295	576	122	chrV:5851545-5852031	putative_enhancer	enhancer	11310	312	86	10	8173	0.0187685
chrV:5949518-5950018	putative_enhancer	enhancer	11504	264	37	chrV:5950870-5951370	putative_enhancer	enhancer	11506	393	78	23	1352	1.37e-05
chrV:6213247-6213747	putative_enhancer	enhancer	12011	601	126	chrV:6232895-6233395	putative_enhancer	enhancer	12048	694	188	9	19648	0.000688593
chrV:6222679-6223173	putative_enhancer	enhancer	12030	549	143	chrV:6223900-6224400	putative_enhancer	enhancer	12032	360	118	17	1224	9.52e-05
chrV:6222679-6223173	putative_enhancer	enhancer	12030	549	143	chrV:6224930-6225430	putative_enhancer	enhancer	12034	430	168	12	2254	0.0263745
chrV:6222679-6223173	putative_enhancer	enhancer	12030	549	143	chrV:6230760-6231178	putative_enhancer	enhancer	12044	596	159	11	8043	1.4e-05
chrV:6232895-6233395	putative_enhancer	enhancer	12048	694	188	chrV:6239768-6240268	putative_enhancer	enhancer	12060	938	155	14	6873	0.000276081
chrV:6239768-6240268	putative_enhancer	enhancer	12060	938	155	chrV:6247300-6247735	putative_enhancer	enhancer	12073	718	162	17	7499	3.11e-09
chrV:6239768-6240268	putative_enhancer	enhancer	12060	938	155	chrV:6247735-6248112	putative_enhancer	enhancer	12074	454	82	14	7905	3.76e-07
chrV:6239768-6240268	putative_enhancer	enhancer	12060	938	155	chrV:6275176-6275676	putative_enhancer	enhancer	12127	736	119	8	35408	0.00167711
chrV:6240658-6241158	putative_enhancer	enhancer	12061	574	112	chrV:6249138-6249606	putative_enhancer	enhancer	12077	321	87	9	8464	0.0156764
chrV:6247300-6247735	putative_enhancer	enhancer	12073	718	162	chrV:6275176-6275676	putative_enhancer	enhancer	12127	736	119	10	27909	9.24e-07
chrV:6342436-6342936	putative_enhancer	enhancer	12250	439	93	chrV:6345928-6346330	putative_enhancer	enhancer	12256	312	58	12	3443	0.00615931
chrV:6342436-6342936	putative_enhancer	enhancer	12250	439	93	chrV:6350082-6350582	putative_enhancer	enhancer	12264	470	111	14	7646	5.72e-07
chrV:6462547-6463047	putative_enhancer	enhancer	12483	534	136	chrV:6475960-6476460	putative_enhancer	enhancer	12507	433	108	11	13413	0.000414663
chrV:6489708-6490208	putative_enhancer	enhancer	12532	392	84	chrV:6492528-6493028	putative_enhancer	enhancer	12537	282	76	13	2820	0.0181851
chrV:6526880-6527380	putative_enhancer	enhancer	12600	515	114	chrV:6544935-6545377	putative_enhancer	enhancer	12630	444	120	11	18026	1.15e-08
chrV:6542900-6543400	putative_enhancer	enhancer	12626	392	103	chrV:6544935-6545377	putative_enhancer	enhancer	12630	444	120	15	2006	0.000301372
chrV:6811823-6812323	putative_enhancer	enhancer	13130	368	51	chrV:6823373-6823873	putative_enhancer	enhancer	13153	408	59	13	11550	2.99e-08
chrV:7822540-7823040	putative_enhancer	enhancer	15092	355	92	chrV:7824091-7824591	putative_enhancer	enhancer	15095	231	61	15	1551	0.0414422
chrV:8017883-8018338	putative_enhancer	enhancer	15468	375	57	chrV:8019764-8020264	putative_enhancer	enhancer	15471	372	59	22	1904	1.49e-08
chrV:8025142-8025599	putative_enhancer	enhancer	15481	383	59	chrV:8027451-8027951	putative_enhancer	enhancer	15485	396	81	17	2331	1.72e-05
chrV:8212739-8213239	putative_enhancer	enhancer	15840	367	62	chrV:8267199-8267699	putative_enhancer	enhancer	15944	430	71	6	54460	0.00291363
chrV:8267199-8267699	putative_enhancer	enhancer	15944	430	71	chrV:8269831-8270331	putative_enhancer	enhancer	15949	259	58	14	2632	0.00455705
chrV:8267199-8267699	putative_enhancer	enhancer	15944	430	71	chrV:8285375-8285805	putative_enhancer	enhancer	15978	238	44	7	18141	0.0133921
chrV:8424430-8424929	putative_enhancer	enhancer	16248	584	112	chrV:8426312-8426695	putative_enhancer	enhancer	16252	268	95	15	1824	0.0172819
chrV:8611001-8611492	putative_enhancer	enhancer	16606	520	114	chrV:8651185-8651685	putative_enhancer	enhancer	16682	813	142	9	40189	4.61e-06
chrV:8651185-8651685	putative_enhancer	enhancer	16682	813	142	chrV:8653707-8654153	putative_enhancer	enhancer	16686	363	87	16	2495	3.38e-05
chrV:8651185-8651685	putative_enhancer	enhancer	16682	813	142	chrV:8654457-8654943	putative_enhancer	enhancer	16687	573	103	17	3265	0.000165072
chrV:8651185-8651685	putative_enhancer	enhancer	16682	813	142	chrV:8661538-8661972	putative_enhancer	enhancer	16701	692	108	27	10320	1.04e-10
chrV:8652112-8652612	putative_enhancer	enhancer	16683	513	89	chrV:8667518-8667962	putative_enhancer	enhancer	16713	479	121	7	15378	0.00839243
chrV:8652926-8653343	putative_enhancer	enhancer	16684	360	86	chrV:8654457-8654943	putative_enhancer	enhancer	16687	573	103	15	1566	0.0188347
chrV:8652926-8653343	putative_enhancer	enhancer	16684	360	86	chrV:8667518-8667962	putative_enhancer	enhancer	16713	479	121	7	14606	0.00145775
chrV:8653343-8653707	putative_enhancer	enhancer	16685	548	93	chrV:8660420-8660920	putative_enhancer	enhancer	16699	531	90	10	7145	0.00226684
chrV:8653343-8653707	putative_enhancer	enhancer	16685	548	93	chrV:8661104-8661538	putative_enhancer	enhancer	16700	604	120	10	7796	0.00121667
chrV:8654457-8654943	putative_enhancer	enhancer	16687	573	103	chrV:8658439-8658939	putative_enhancer	enhancer	16695	583	127	13	3989	0.00320364
chrV:8655906-8656336	putative_enhancer	enhancer	16690	366	91	chrV:8657156-8657540	putative_enhancer	enhancer	16692	318	83	15	1227	0.00127405
chrV:8657896-8658368	putative_enhancer	enhancer	16694	446	96	chrV:8661538-8661972	putative_enhancer	enhancer	16701	692	108	13	3623	0.000506954
chrV:8658439-8658939	putative_enhancer	enhancer	16695	583	127	chrV:8660420-8660920	putative_enhancer	enhancer	16699	531	90	15	1981	0.0174225
chrV:8658439-8658939	putative_enhancer	enhancer	16695	583	127	chrV:8667518-8667962	putative_enhancer	enhancer	16713	479	121	10	9051	3.44e-05
chrV:8661538-8661972	putative_enhancer	enhancer	16701	692	108	chrV:8769059-8769559	putative_enhancer	enhancer	16913	406	70	6	107554	0.000132625
chrV:8782012-8782504	putative_enhancer	enhancer	16938	739	152	chrV:8784078-8784469	putative_enhancer	enhancer	16942	461	99	22	2015	3e-06
chrV:8950643-8951073	putative_enhancer	enhancer	17269	629	116	chrV:8956264-8956656	putative_enhancer	enhancer	17280	456	91	13	5602	0.0115552
chrV:9074383-9074793	putative_enhancer	enhancer	17507	471	76	chrV:9085819-9086219	putative_enhancer	enhancer	17528	491	126	9	11431	0.00196185
chrV:9202644-9203144	putative_enhancer	enhancer	17745	403	65	chrV:9205138-9205542	putative_enhancer	enhancer	17749	227	51	14	2446	0.000215032
chrV:9208808-9209235	putative_enhancer	enhancer	17756	534	88	chrV:9212420-9212920	putative_enhancer	enhancer	17763	848	152	25	3649	5.96e-08
chrV:9212420-9212920	putative_enhancer	enhancer	17763	848	152	chrV:9217670-9218151	putative_enhancer	enhancer	17772	396	96	22	5240	1.24e-09
chrV:9253652-9254152	putative_enhancer	enhancer	17842	225	56	chrV:9255433-9255933	putative_enhancer	enhancer	17845	653	116	19	1781	0.00170091
chrV:9254198-9254698	putative_enhancer	enhancer	17843	321	58	chrV:9255433-9255933	putative_enhancer	enhancer	17845	653	116	35	1235	1.04e-10
chrV:9443048-9443548	putative_enhancer	enhancer	18202	562	101	chrV:9492402-9492902	putative_enhancer	enhancer	18294	252	64	7	49354	2.5e-05
chrV:979615-980115	putative_enhancer	enhancer	1898	467	181	chrV:983571-984071	putative_enhancer	enhancer	1906	193	62	16	3956	8.89e-08
chrX:1018268-1018651	putative_enhancer	enhancer	1952	310	84	chrX:986454-986954	putative_enhancer	enhancer	1892	158	52	6	31755	0.0299579
chrX:10378458-10378899	putative_enhancer	enhancer	19757	218	27	chrX:10397331-10397831	putative_enhancer	enhancer	19792	292	55	7	18903	0.00534277
chrX:10477550-10477951	putative_enhancer	enhancer	19950	418	54	chrX:10479240-10479622	putative_enhancer	enhancer	19954	307	51	19	1681	0.000567504
chrX:10477550-10477951	putative_enhancer	enhancer	19950	418	54	chrX:10532038-10532476	putative_enhancer	enhancer	20051	369	49	7	54507	0.000304304
chrX:10766834-10767249	putative_enhancer	enhancer	20493	637	119	chrX:10771976-10772476	putative_enhancer	enhancer	20502	1457	231	29	5185	1.93e-07
chrX:10767645-10768126	putative_enhancer	enhancer	20495	785	195	chrX:11031058-11031558	putative_enhancer	enhancer	20999	2578	546	9	263423	0.00373771
chrX:10771976-10772476	putative_enhancer	enhancer	20502	1457	231	chrX:10780415-10780844	putative_enhancer	enhancer	20517	511	87	26	8403	7.89e-10
chrX:11031058-11031558	putative_enhancer	enhancer	20999	2578	546	chrX:11034616-11035037	putative_enhancer	enhancer	21006	693	161	47	3518	1.99e-05
chrX:11031058-11031558	putative_enhancer	enhancer	20999	2578	546	chrX:11036408-11036716	putative_enhancer	enhancer	21009	519	81	40	5254	1.13e-10
chrX:11031058-11031558	putative_enhancer	enhancer	20999	2578	546	chrX:11521965-11522465	putative_enhancer	enhancer	21928	1860	250	10	490907	0.00328285
chrX:11059653-11060153	putative_enhancer	enhancer	21054	534	134	chrX:11060730-11061230	putative_enhancer	enhancer	21056	378	96	27	1077	0.00440184
chrX:1117187-1117687	putative_enhancer	enhancer	2140	425	102	chrX:1126130-1126630	putative_enhancer	enhancer	2155	294	47	15	8943	2.69e-07
chrX:1117187-1117687	putative_enhancer	enhancer	2140	425	102	chrX:1477897-1478397	putative_enhancer	enhancer	2829	934	136	6	360710	0.00234582
chrX:11247967-11248467	putative_enhancer	enhancer	21408	985	202	chrX:11725553-11726035	putative_enhancer	enhancer	22320	640	84	6	477577	0.00826734
chrX:11461507-11461968	putative_enhancer	enhancer	21817	484	93	chrX:11478659-11479122	putative_enhancer	enhancer	21848	1134	262	11	17153	0.00999095
chrX:11463875-11464273	putative_enhancer	enhancer	21821	491	109	chrX:11482551-11483028	putative_enhancer	enhancer	21856	1044	199	12	18715	5.79e-06
chrX:11466749-11467184	putative_enhancer	enhancer	21826	520	99	chrX:11478659-11479122	putative_enhancer	enhancer	21848	1134	262	17	11924	1.19e-06
chrX:11473197-11473697	putative_enhancer	enhancer	21837	796	261	chrX:11475559-11476045	putative_enhancer	enhancer	21842	324	97	19	2355	0.0268265
chrX:11481023-11481440	putative_enhancer	enhancer	21853	688	131	chrX:11482551-11483028	putative_enhancer	enhancer	21856	1044	199	33	1558	0.00685998
chrX:11521965-11522465	putative_enhancer	enhancer	21928	1860	250	chrX:11937224-11937724	putative_enhancer	enhancer	22723	2220	254	23	415259	1.13e-10
chrX:11898942-11899442	putative_enhancer	enhancer	22652	404	38	chrX:11937224-11937724	putative_enhancer	enhancer	22723	2220	254	17	38282	1.13e-09
chrX:11962289-11962789	putative_enhancer	enhancer	22770	913	102	chrX:11968023-11968411	putative_enhancer	enhancer	22780	467	87	21	5678	9.96e-07
chrX:12003870-12004261	putative_enhancer	enhancer	22846	354	42	chrX:12004815-12005315	putative_enhancer	enhancer	22848	352	59	22	1000	0.00190248
chrX:12509201-12509677	putative_enhancer	enhancer	23803	1244	162	chrX:12517774-12518274	putative_enhancer	enhancer	23818	664	151	19	8585	0.00852337
chrX:12510001-12510501	putative_enhancer	enhancer	23804	1407	286	chrX:13009536-13010036	putative_enhancer	enhancer	24751	687	127	6	499535	0.0469087
chrX:12627696-12628191	putative_enhancer	enhancer	24031	721	83	chrX:12633631-12634067	putative_enhancer	enhancer	24041	542	91	17	5906	0.000114771
chrX:12627696-12628191	putative_enhancer	enhancer	24031	721	83	chrX:12655527-12655931	putative_enhancer	enhancer	24082	1034	248	11	27786	0.00369923
chrX:12628321-12628754	putative_enhancer	enhancer	24032	423	86	chrX:12631617-12632097	putative_enhancer	enhancer	24038	379	74	16	3320	0.00163447
chrX:12633631-12634067	putative_enhancer	enhancer	24041	542	91	chrX:12655527-12655931	putative_enhancer	enhancer	24082	1034	248	10	21880	0.0273638
chrX:12821883-12822383	putative_enhancer	enhancer	24400	255	70	chrX:12827863-12828363	putative_enhancer	enhancer	24410	453	88	14	5980	0.00388644
chrX:12872144-12872644	putative_enhancer	enhancer	24491	1452	248	chrX:12876777-12877277	putative_enhancer	enhancer	24499	1201	242	42	4633	4.36e-08
chrX:12872144-12872644	putative_enhancer	enhancer	24491	1452	248	chrX:13163058-13163545	putative_enhancer	enhancer	25041	498	110	6	290907	0.02759
chrX:12911083-12911583	putative_enhancer	enhancer	24563	346	60	chrX:13164171-13164671	putative_enhancer	enhancer	25043	644	115	6	253088	0.000356385
chrX:13004321-13004697	putative_enhancer	enhancer	24741	421	97	chrX:13014209-13014709	putative_enhancer	enhancer	24759	466	83	12	9950	7.73e-05
chrX:13004321-13004697	putative_enhancer	enhancer	24741	421	97	chrX:13157171-13157671	putative_enhancer	enhancer	25031	486	84	6	152912	0.000487091
chrX:13009536-13010036	putative_enhancer	enhancer	24751	687	127	chrX:13700550-13701050	putative_enhancer	enhancer	26050	2966	346	7	691014	0.00945559
chrX:13144069-13144569	putative_enhancer	enhancer	25007	1871	389	chrX:13251331-13251831	putative_enhancer	enhancer	25205	1268	250	12	107262	2.33e-05
chrX:13158859-13159359	putative_enhancer	enhancer	25034	707	110	chrX:13163058-13163545	putative_enhancer	enhancer	25041	498	110	19	4192	0.000440491
chrX:13158859-13159359	putative_enhancer	enhancer	25034	707	110	chrX:13165527-13165948	putative_enhancer	enhancer	25045	642	81	18	6628	1.65e-05
chrX:13348259-13348759	putative_enhancer	enhancer	25388	746	141	chrX:13356281-13356781	putative_enhancer	enhancer	25402	1116	199	16	8022	0.0241497
chrX:13351231-13351727	putative_enhancer	enhancer	25393	621	124	chrX:13353428-13353928	putative_enhancer	enhancer	25397	1313	246	31	2199	0.000686728
chrX:13353428-13353928	putative_enhancer	enhancer	25397	1313	246	chrX:13356281-13356781	putative_enhancer	enhancer	25402	1116	199	48	2853	1.13e-10
chrX:13353428-13353928	putative_enhancer	enhancer	25397	1313	246	chrX:13360492-13360992	putative_enhancer	enhancer	25409	579	90	26	7064	1.13e-10
chrX:13356281-13356781	putative_enhancer	enhancer	25402	1116	199	chrX:13357513-13358013	putative_enhancer	enhancer	25404	459	88	33	1232	0.00142635
chrX:13528469-13528969	putative_enhancer	enhancer	25727	1101	160	chrX:13700550-13701050	putative_enhancer	enhancer	26050	2966	346	12	172081	0.000254788
chrX:13675292-13675792	putative_enhancer	enhancer	26003	1354	189	chrX:13700550-13701050	putative_enhancer	enhancer	26050	2966	346	23	25258	5.52e-05
chrX:13700550-13701050	putative_enhancer	enhancer	26050	2966	346	chrX:13950599-13951091	putative_enhancer	enhancer	26518	1467	290	10	250045	0.0375486
chrX:13700550-13701050	putative_enhancer	enhancer	26050	2966	346	chrX:14525286-14525672	putative_enhancer	enhancer	27614	783	144	15	824679	1.13e-10
chrX:13744583-13745083	putative_enhancer	enhancer	26133	916	167	chrX:13752677-13753143	putative_enhancer	enhancer	26147	398	94	13	8077	0.0274513
chrX:13803126-13803626	putative_enhancer	enhancer	26241	451	111	chrX:13818700-13819200	putative_enhancer	enhancer	26271	238	29	10	15574	0.000414719
chrX:13884136-13884554	putative_enhancer	enhancer	26392	290	65	chrX:14003406-14003906	putative_enhancer	enhancer	26618	574	91	6	119311	0.00109239
chrX:13941142-13941642	putative_enhancer	enhancer	26500	533	122	chrX:13950599-13951091	putative_enhancer	enhancer	26518	1467	290	19	9453	0.000383824
chrX:1395788-1396288	putative_enhancer	enhancer	2671	529	70	chrX:1445606-1446006	putative_enhancer	enhancer	2766	324	66	8	49768	0.000159577
chrX:14194104-14194587	putative_enhancer	enhancer	26979	289	40	chrX:14213155-14213655	putative_enhancer	enhancer	27015	327	72	9	19060	0.000362467
chrX:14491040-14491537	putative_enhancer	enhancer	27549	508	91	chrX:14507875-14508375	putative_enhancer	enhancer	27581	974	141	11	16837	0.0450042
chrX:14503164-14503664	putative_enhancer	enhancer	27572	703	101	chrX:14508711-14509211	putative_enhancer	enhancer	27582	1072	171	24	5547	9.51e-05
chrX:14557911-14558401	putative_enhancer	enhancer	27676	941	143	chrX:14560109-14560609	putative_enhancer	enhancer	27680	1743	324	58	2203	1.13e-10
chrX:14706891-14707299	putative_enhancer	enhancer	27958	674	93	chrX:14768909-14769409	putative_enhancer	enhancer	28073	435	77	7	62064	0.0102753
chrX:1477897-1478397	putative_enhancer	enhancer	2829	934	136	chrX:1479602-1480078	putative_enhancer	enhancer	2832	391	93	37	1693	3.38e-09
chrX:1477897-1478397	putative_enhancer	enhancer	2829	934	136	chrX:1541027-1541527	putative_enhancer	enhancer	2944	544	75	11	63130	1.44e-06
chrX:1477897-1478397	putative_enhancer	enhancer	2829	934	136	chrX:2107362-2107834	putative_enhancer	enhancer	4028	366	50	6	629451	8.84e-05
chrX:14944152-14944652	putative_enhancer	enhancer	28405	281	61	chrX:14946307-14946678	putative_enhancer	enhancer	28409	523	66	20	2090	0.000314034
chrX:15093387-15093887	putative_enhancer	enhancer	28689	395	77	chrX:15097657-15098124	putative_enhancer	enhancer	28697	359	59	15	4253	0.00161549
chrX:1524492-1524982	putative_enhancer	enhancer	2913	1210	222	chrX:727651-728151	putative_enhancer	enhancer	1401	1553	336	11	796836	4.51e-09
chrX:1524492-1524982	putative_enhancer	enhancer	2913	1210	222	chrX:1527316-1527816	putative_enhancer	enhancer	2919	863	125	39	2829	0.000972713
chrX:1524492-1524982	putative_enhancer	enhancer	2913	1210	222	chrX:1578556-1579056	putative_enhancer	enhancer	3016	647	106	13	54069	1.8e-06
chrX:15264047-15264479	putative_enhancer	enhancer	29013	384	74	chrX:15276609-15277084	putative_enhancer	enhancer	29035	1211	263	12	12583	0.039709
chrX:15274011-15274511	putative_enhancer	enhancer	29030	1209	257	chrX:15276609-15277084	putative_enhancer	enhancer	29035	1211	263	38	2585	0.00637657
chrX:15274011-15274511	putative_enhancer	enhancer	29030	1209	257	chrX:15279200-15279700	putative_enhancer	enhancer	29039	762	166	25	5189	0.000216831
chrX:15274011-15274511	putative_enhancer	enhancer	29030	1209	257	chrX:15280205-15280705	putative_enhancer	enhancer	29041	656	148	23	6194	2.98e-05
chrX:15280205-15280705	putative_enhancer	enhancer	29041	656	148	chrX:15379796-15380296	putative_enhancer	enhancer	29228	376	72	6	99591	0.019371
chrX:15365664-15366164	putative_enhancer	enhancer	29203	575	107	chrX:15382740-15383240	putative_enhancer	enhancer	29234	702	122	13	17076	0.000159039
chrX:15365664-15366164	putative_enhancer	enhancer	29203	575	107	chrX:15709363-15709863	putative_enhancer	enhancer	29847	1362	181	6	343699	0.0368191
chrX:15629964-15630464	putative_enhancer	enhancer	29697	230	62	chrX:15645584-15646084	putative_enhancer	enhancer	29727	382	86	8	15620	0.00477874
chrX:15645584-15646084	putative_enhancer	enhancer	29727	382	86	chrX:15700069-15700563	putative_enhancer	enhancer	29830	723	101	7	54482	0.0209657
chrX:15700069-15700563	putative_enhancer	enhancer	29830	723	101	chrX:15704383-15704838	putative_enhancer	enhancer	29838	668	94	21	4294	7.95e-05
chrX:15700069-15700563	putative_enhancer	enhancer	29830	723	101	chrX:15709363-15709863	putative_enhancer	enhancer	29847	1362	181	36	9297	1.13e-10
chrX:15700069-15700563	putative_enhancer	enhancer	29830	723	101	chrX:15941345-15941845	putative_enhancer	enhancer	30292	511	72	6	241279	0.00803098
chrX:15700069-15700563	putative_enhancer	enhancer	29830	723	101	chrX:16040114-16040614	putative_enhancer	enhancer	30481	973	173	6	340048	0.0248835
chrX:15704383-15704838	putative_enhancer	enhancer	29838	668	94	chrX:15707324-15707824	putative_enhancer	enhancer	29843	1729	305	33	2964	0.0157245
chrX:15704383-15704838	putative_enhancer	enhancer	29838	668	94	chrX:15709363-15709863	putative_enhancer	enhancer	29847	1362	181	27	5003	2.26e-06
chrX:15704838-15705294	putative_enhancer	enhancer	29839	491	67	chrX:15707324-15707824	putative_enhancer	enhancer	29843	1729	305	33	2508	0.0391441
chrX:15704838-15705294	putative_enhancer	enhancer	29839	491	67	chrX:15709363-15709863	putative_enhancer	enhancer	29847	1362	181	23	4547	0.000986644
chrX:15707324-15707824	putative_enhancer	enhancer	29843	1729	305	chrX:15709363-15709863	putative_enhancer	enhancer	29847	1362	181	86	2039	1.13e-10
chrX:15736322-15736822	putative_enhancer	enhancer	29899	857	89	chrX:16681765-16682253	putative_enhancer	enhancer	31687	3065	345	9	945437	7.02e-06
chrX:1578556-1579056	putative_enhancer	enhancer	3016	647	106	chrX:1582049-1582549	putative_enhancer	enhancer	3022	297	47	21	3493	0.000360153
chrX:15846443-15846943	putative_enhancer	enhancer	30111	483	98	chrX:15847554-15848054	putative_enhancer	enhancer	30113	460	83	31	1111	3.97e-06
chrX:15941345-15941845	putative_enhancer	enhancer	30292	511	72	chrX:15944126-15944537	putative_enhancer	enhancer	30297	288	44	18	2736	0.00232033
chrX:16143820-16144320	putative_enhancer	enhancer	30675	786	140	chrX:16147607-16148082	putative_enhancer	enhancer	30682	1551	318	39	3774	2.04e-06
chrX:16147607-16148082	putative_enhancer	enhancer	30682	1551	318	chrX:16798993-16799471	putative_enhancer	enhancer	31907	1709	337	9	651388	9.47e-05
chrX:16202045-16202545	putative_enhancer	enhancer	30784	590	103	chrX:16681765-16682253	putative_enhancer	enhancer	31687	3065	345	19	479714	1.13e-10
chrX:16202045-16202545	putative_enhancer	enhancer	30784	590	103	chrX:16691457-16691957	putative_enhancer	enhancer	31705	350	50	6	489412	9.19e-05
chrX:16327132-16327632	putative_enhancer	enhancer	31018	207	43	chrX:16681765-16682253	putative_enhancer	enhancer	31687	3065	345	6	354627	0.0231108
chrX:16331793-16332276	putative_enhancer	enhancer	31027	932	149	chrX:16342126-16342615	putative_enhancer	enhancer	31047	650	140	23	10336	2.03e-09
chrX:16331793-16332276	putative_enhancer	enhancer	31027	932	149	chrX:16348868-16349368	putative_enhancer	enhancer	31060	1058	167	19	17084	4.61e-07
chrX:16331793-16332276	putative_enhancer	enhancer	31027	932	149	chrX:16681765-16682253	putative_enhancer	enhancer	31687	3065	345	18	349975	1.13e-10
chrX:16346423-16346818	putative_enhancer	enhancer	31055	383	66	chrX:16348868-16349368	putative_enhancer	enhancer	31060	1058	167	27	2498	3.47e-07
chrX:16348868-16349368	putative_enhancer	enhancer	31060	1058	167	chrX:16354138-16354561	putative_enhancer	enhancer	31069	530	110	28	5231	5.63e-09
chrX:16387754-16388251	putative_enhancer	enhancer	31135	295	79	chrX:16392035-16392535	putative_enhancer	enhancer	31142	395	86	16	4283	0.00190737
chrX:16402557-16403057	putative_enhancer	enhancer	31163	361	72	chrX:16447029-16447522	putative_enhancer	enhancer	31246	296	60	7	44468	0.00439263
chrX:16484552-16485052	putative_enhancer	enhancer	31317	390	110	chrX:16612515-16612916	putative_enhancer	enhancer	31555	1937	519	10	127913	2.36e-05
chrX:16612515-16612916	putative_enhancer	enhancer	31555	1937	519	chrX:16681765-16682253	putative_enhancer	enhancer	31687	3065	345	22	69294	2.4e-07
chrX:16626553-16626968	putative_enhancer	enhancer	31581	381	104	chrX:16658148-16658619	putative_enhancer	enhancer	31641	523	106	8	31623	0.00212131
chrX:16675765-16676187	putative_enhancer	enhancer	31675	488	89	chrX:16681765-16682253	putative_enhancer	enhancer	31687	3065	345	28	6033	0.00914749
chrX:16681765-16682253	putative_enhancer	enhancer	31687	3065	345	chrX:16703500-16703988	putative_enhancer	enhancer	31728	244	74	13	21735	0.0173366
chrX:16681765-16682253	putative_enhancer	enhancer	31687	3065	345	chrX:17185573-17186073	putative_enhancer	enhancer	32645	349	93	8	503814	2.46e-05
chrX:16681765-16682253	putative_enhancer	enhancer	31687	3065	345	chrX:17539898-17540339	putative_enhancer	enhancer	33311	548	104	7	858109	0.000832299
chrX:16681765-16682253	putative_enhancer	enhancer	31687	3065	345	chrX:17562058-17562558	putative_enhancer	enhancer	33354	785	141	11	880299	2.05e-08
chrX:16798993-16799471	putative_enhancer	enhancer	31907	1709	337	chrX:17516728-17517228	putative_enhancer	enhancer	33267	914	196	10	717746	1.28e-08
chrX:17053977-17054477	putative_enhancer	enhancer	32394	437	94	chrX:17061983-17062483	putative_enhancer	enhancer	32409	372	82	14	8006	0.000340405
chrX:17197683-17198183	putative_enhancer	enhancer	32668	350	70	chrX:17205726-17206226	putative_enhancer	enhancer	32684	427	118	14	8043	0.000349091
chrX:17419647-17420147	putative_enhancer	enhancer	33085	581	135	chrX:17427659-17428159	putative_enhancer	enhancer	33099	607	144	18	8012	2.45e-06
chrX:17419647-17420147	putative_enhancer	enhancer	33085	581	135	chrX:17508934-17509434	putative_enhancer	enhancer	33254	427	78	6	89287	0.0357358
chrX:17427659-17428159	putative_enhancer	enhancer	33099	607	144	chrX:17511573-17512055	putative_enhancer	enhancer	33258	291	71	6	83905	0.0151275
chrX:17508934-17509434	putative_enhancer	enhancer	33254	427	78	chrX:17510430-17510930	putative_enhancer	enhancer	33256	434	89	22	1496	0.0440519
chrX:17515092-17515592	putative_enhancer	enhancer	33264	459	111	chrX:17516728-17517228	putative_enhancer	enhancer	33267	914	196	31	1636	2.87e-05
chrX:17516728-17517228	putative_enhancer	enhancer	33267	914	196	chrX:17531051-17531551	putative_enhancer	enhancer	33294	348	68	11	14323	0.0114002
chrX:17516728-17517228	putative_enhancer	enhancer	33267	914	196	chrX:17630814-17631314	putative_enhancer	enhancer	33485	807	203	7	114086	0.031781
chrX:17630814-17631314	putative_enhancer	enhancer	33485	807	203	chrX:17638261-17638761	putative_enhancer	enhancer	33498	605	85	17	7447	0.000866513
chrX:17630814-17631314	putative_enhancer	enhancer	33485	807	203	chrX:17683680-17684091	putative_enhancer	enhancer	33585	301	90	7	52821	0.00379231
chrX:17682197-17682697	putative_enhancer	enhancer	33582	398	89	chrX:17683680-17684091	putative_enhancer	enhancer	33585	301	90	19	1438	0.00579469
chrX:1937875-1938375	putative_enhancer	enhancer	3708	359	66	chrX:1939219-1939719	putative_enhancer	enhancer	3710	215	36	23	1344	0.000116898
chrX:1937875-1938375	putative_enhancer	enhancer	3708	359	66	chrX:1961296-1961776	putative_enhancer	enhancer	3753	704	117	10	23411	0.001759
chrX:2107362-2107834	putative_enhancer	enhancer	4028	366	50	chrX:2157779-2158215	putative_enhancer	enhancer	4123	553	89	9	50399	1.84e-05
chrX:2107362-2107834	putative_enhancer	enhancer	4028	366	50	chrX:2181198-2181698	putative_enhancer	enhancer	4169	274	46	6	73850	0.0128641
chrX:2208338-2208809	putative_enhancer	enhancer	4220	404	104	chrX:2216579-2217048	putative_enhancer	enhancer	4234	537	117	11	8240	0.0137918
chrX:2410920-2411420	putative_enhancer	enhancer	4607	399	50	chrX:2432428-2432928	putative_enhancer	enhancer	4647	1567	253	14	21508	0.000107467
chrX:2425285-2425785	putative_enhancer	enhancer	4635	484	81	chrX:2432428-2432928	putative_enhancer	enhancer	4647	1567	253	29	7143	5.66e-08
chrX:2432428-2432928	putative_enhancer	enhancer	4647	1567	253	chrX:2433771-2434207	putative_enhancer	enhancer	4649	385	67	41	1311	0.00482938
chrX:2432428-2432928	putative_enhancer	enhancer	4647	1567	253	chrX:2569056-2569556	putative_enhancer	enhancer	4902	1018	160	10	136628	0.00033118
chrX:3101482-3101982	putative_enhancer	enhancer	5910	772	165	chrX:3111660-3112088	putative_enhancer	enhancer	5928	620	170	15	10142	0.0204681
chrX:343684-344184	putative_enhancer	enhancer	676	522	131	chrX:806457-806957	putative_enhancer	enhancer	1553	1607	185	6	462773	0.0286577
chrX:3505109-3505565	putative_enhancer	enhancer	6674	420	58	chrX:3613637-3614097	putative_enhancer	enhancer	6880	448	62	6	108530	0.00553872
chrX:3533956-3534335	putative_enhancer	enhancer	6729	448	68	chrX:3540819-3541264	putative_enhancer	enhancer	6742	944	160	17	6896	0.0220412
chrX:3534335-3534714	putative_enhancer	enhancer	6730	546	86	chrX:3551666-3552166	putative_enhancer	enhancer	6762	413	84	9	17392	0.0269945
chrX:3816098-3816598	putative_enhancer	enhancer	7271	350	58	chrX:3829559-3830052	putative_enhancer	enhancer	7299	673	107	9	13457	0.037314
chrX:3819098-3819592	putative_enhancer	enhancer	7277	596	106	chrX:3820600-3821100	putative_enhancer	enhancer	7280	575	117	28	1505	0.00960682
chrX:3819098-3819592	putative_enhancer	enhancer	7277	596	106	chrX:3823946-3824327	putative_enhancer	enhancer	7287	519	88	16	4791	0.000818093
chrX:3819098-3819592	putative_enhancer	enhancer	7277	596	106	chrX:3829559-3830052	putative_enhancer	enhancer	7299	673	107	13	10460	0.00234088
chrX:3819098-3819592	putative_enhancer	enhancer	7277	596	106	chrX:3832013-3832503	putative_enhancer	enhancer	7303	563	102	12	12913	0.000439478
chrX:3820600-3821100	putative_enhancer	enhancer	7280	575	117	chrX:3823946-3824327	putative_enhancer	enhancer	7287	519	88	18	3286	0.000621424
chrX:3820600-3821100	putative_enhancer	enhancer	7280	575	117	chrX:3829559-3830052	putative_enhancer	enhancer	7299	673	107	14	8955	0.000690319
chrX:3823946-3824327	putative_enhancer	enhancer	7287	519	88	chrX:3829559-3830052	putative_enhancer	enhancer	7299	673	107	14	5669	0.00330782
chrX:3823946-3824327	putative_enhancer	enhancer	7287	519	88	chrX:3832013-3832503	putative_enhancer	enhancer	7303	563	102	13	8122	7.13e-05
chrX:3829559-3830052	putative_enhancer	enhancer	7299	673	107	chrX:3832013-3832503	putative_enhancer	enhancer	7303	563	102	26	2453	8.33e-08
chrX:3959140-3959640	putative_enhancer	enhancer	7546	241	52	chrX:3978695-3979195	putative_enhancer	enhancer	7582	282	62	8	19555	0.014379
chrX:4137749-4138226	putative_enhancer	enhancer	7886	716	122	chrX:4142069-4142564	putative_enhancer	enhancer	7894	868	173	20	4329	0.0395153
chrX:456258-456758	putative_enhancer	enhancer	890	256	61	chrX:504866-505311	putative_enhancer	enhancer	980	263	51	7	48580	0.000237094
chrX:4818776-4819276	putative_enhancer	enhancer	9183	521	93	chrX:4821501-4822001	putative_enhancer	enhancer	9188	335	70	18	2725	0.00340808
chrX:4957261-4957697	putative_enhancer	enhancer	9453	464	82	chrX:4962167-4962667	putative_enhancer	enhancer	9461	984	249	22	4938	0.000560174
chrX:5121703-5122203	putative_enhancer	enhancer	9765	375	117	chrX:5140022-5140522	putative_enhancer	enhancer	9800	647	156	11	18319	0.00432062
chrX:5429261-5429761	putative_enhancer	enhancer	10353	2092	204	chrX:5467272-5467772	putative_enhancer	enhancer	10426	659	111	12	38011	0.0309744
chrX:5429261-5429761	putative_enhancer	enhancer	10353	2092	204	chrX:5631194-5631574	putative_enhancer	enhancer	10739	210	30	7	201873	0.000135302
chrX:5457053-5457494	putative_enhancer	enhancer	10406	372	43	chrX:5466021-5466377	putative_enhancer	enhancer	10423	353	56	11	8926	0.0025654
chrX:5604954-5605454	putative_enhancer	enhancer	10688	427	54	chrX:5628288-5628774	putative_enhancer	enhancer	10734	446	74	9	23327	0.000543387
chrX:6318668-6319168	putative_enhancer	enhancer	12035	332	58	chrX:6416598-6417098	putative_enhancer	enhancer	12221	641	89	6	97930	0.0365503
chrX:637561-638061	putative_enhancer	enhancer	1233	349	58	chrX:646389-646889	putative_enhancer	enhancer	1248	336	65	14	8828	8.25e-07
chrX:637561-638061	putative_enhancer	enhancer	1233	349	58	chrX:651543-652043	putative_enhancer	enhancer	1258	331	67	11	13982	4.37e-05
chrX:6515131-6515631	putative_enhancer	enhancer	12410	636	104	chrX:6519857-6520326	putative_enhancer	enhancer	12418	413	54	23	4710	1.13e-10
chrX:6538092-6538592	putative_enhancer	enhancer	12452	532	80	chrX:6551731-6552231	putative_enhancer	enhancer	12478	897	161	16	13639	2.02e-06
chrX:6736275-6736775	putative_enhancer	enhancer	12828	1011	165	chrX:6739344-6739631	putative_enhancer	enhancer	12835	392	69	18	2962	0.00133707
chrX:6736275-6736775	putative_enhancer	enhancer	12828	1011	165	chrX:6741465-6741965	putative_enhancer	enhancer	12841	743	153	28	5190	3.38e-10
chrX:6736275-6736775	putative_enhancer	enhancer	12828	1011	165	chrX:6750085-6750585	putative_enhancer	enhancer	12856	1454	250	19	13810	0.000130398
chrX:6737313-6737645	putative_enhancer	enhancer	12830	641	136	chrX:6741465-6741965	putative_enhancer	enhancer	12841	743	153	16	4236	0.0248063
chrX:6737645-6738033	putative_enhancer	enhancer	12831	1365	227	chrX:6741465-6741965	putative_enhancer	enhancer	12841	743	153	23	3876	0.0230085
chrX:6737645-6738033	putative_enhancer	enhancer	12831	1365	227	chrX:6742734-6743234	putative_enhancer	enhancer	12843	1103	240	28	5145	0.000181648
chrX:6737645-6738033	putative_enhancer	enhancer	12831	1365	227	chrX:6744453-6744912	putative_enhancer	enhancer	12846	846	160	22	6843	0.00019766
chrX:6737645-6738033	putative_enhancer	enhancer	12831	1365	227	chrX:6749098-6749589	putative_enhancer	enhancer	12854	1016	228	21	11504	5.09e-07
chrX:6737645-6738033	putative_enhancer	enhancer	12831	1365	227	chrX:6750085-6750585	putative_enhancer	enhancer	12856	1454	250	32	12496	1.13e-10
chrX:6742734-6743234	putative_enhancer	enhancer	12843	1103	240	chrX:6745393-6745893	putative_enhancer	enhancer	12848	676	143	30	2659	2.26e-05
chrX:6742734-6743234	putative_enhancer	enhancer	12843	1103	240	chrX:6749098-6749589	putative_enhancer	enhancer	12854	1016	228	21	6359	0.000312781
chrX:6744453-6744912	putative_enhancer	enhancer	12846	846	160	chrX:6747898-6748398	putative_enhancer	enhancer	12852	898	176	24	3466	0.0019278
chrX:6747898-6748398	putative_enhancer	enhancer	12852	898	176	chrX:6749098-6749589	putative_enhancer	enhancer	12854	1016	228	59	1195	1.13e-10
chrX:6758850-6759350	putative_enhancer	enhancer	12873	367	75	chrX:6796058-6796558	putative_enhancer	enhancer	12942	428	62	7	37208	0.0346635
chrX:7153292-7153792	putative_enhancer	enhancer	13623	496	84	chrX:7224906-7225406	putative_enhancer	enhancer	13758	360	99	7	71614	0.0145006
chrX:727651-728151	putative_enhancer	enhancer	1401	1553	336	chrX:806457-806957	putative_enhancer	enhancer	1553	1607	185	12	78806	0.0392213
chrX:727651-728151	putative_enhancer	enhancer	1401	1553	336	chrX:812177-812677	putative_enhancer	enhancer	1564	539	84	10	84526	0.00035984
chrX:7585624-7586048	putative_enhancer	enhancer	14439	655	109	chrX:7587642-7588142	putative_enhancer	enhancer	14443	485	98	25	2056	0.00295732
chrX:7814634-7815122	putative_enhancer	enhancer	14875	1198	184	chrX:7825633-7826133	putative_enhancer	enhancer	14895	907	173	29	11005	1.15e-08
chrX:8242998-8243498	putative_enhancer	enhancer	15691	490	105	chrX:8246016-8246516	putative_enhancer	enhancer	15697	385	83	18	3018	0.0316162
chrX:8276315-8276732	putative_enhancer	enhancer	15755	499	96	chrX:8565916-8566416	putative_enhancer	enhancer	16309	860	198	6	289643	0.0210189
chrX:8565916-8566416	putative_enhancer	enhancer	16309	860	198	chrX:8569048-8569548	putative_enhancer	enhancer	16314	617	121	35	3132	1.5e-07
chrX:8754171-8754671	putative_enhancer	enhancer	16663	455	82	chrX:8755917-8756417	putative_enhancer	enhancer	16666	452	55	25	1746	0.00283082
chrX:8755917-8756417	putative_enhancer	enhancer	16666	452	55	chrX:8760902-8761347	putative_enhancer	enhancer	16675	511	96	17	4957	0.00507113
chrX:9226830-9227329	putative_enhancer	enhancer	17562	642	108	chrX:9228244-9228744	putative_enhancer	enhancer	17564	600	109	33	1415	0.00297481
chrX:9408949-9409449	putative_enhancer	enhancer	17910	491	77	chrX:9547885-9548295	putative_enhancer	enhancer	18176	350	69	6	138891	0.00196712
chrX:9602499-9602999	putative_enhancer	enhancer	18281	345	57	chrX:9637080-9637580	putative_enhancer	enhancer	18346	1368	222	10	34581	0.0358998
chrX:9637080-9637580	putative_enhancer	enhancer	18346	1368	222	chrX:9987075-9987575	putative_enhancer	enhancer	19014	243	55	7	349995	7.74e-05
chrI:10025798-10026298	coding_promoter	promoter	19221	254	33	chrI:9984876-9985376	putative_enhancer	enhancer	19144	1823	305	9	40922	0.00883328
chrI:10037468-10037968	coding_promoter	promoter	19245	658	215	chrI:10040322-10040776	putative_enhancer	enhancer	19250	400	117	24	2831	1.96e-07
chrI:10104780-10105278	unassigned_promoter	promoter	19370	571	119	chrI:9984876-9985376	putative_enhancer	enhancer	19144	1823	305	8	119903	0.0021743
chrI:10116743-10117243	coding_promoter	promoter	19393	449	83	chrI:10119672-10120172	putative_enhancer	enhancer	19398	225	55	14	2929	0.018432
chrI:10161756-10162146	coding_promoter	promoter	19481	369	83	chrI:9984876-9985376	putative_enhancer	enhancer	19144	1823	305	8	176825	0.000109028
chrI:10173600-10174029	coding_promoter	promoter	19504	555	102	chrI:9984876-9985376	putative_enhancer	enhancer	19144	1823	305	8	188688	0.000125923
chrI:10197016-10197516	coding_promoter	promoter	19549	1437	251	chrI:9984876-9985376	putative_enhancer	enhancer	19144	1823	305	19	212140	8.29e-11
chrI:10197016-10197516	coding_promoter	promoter	19549	1437	251	chrI:10769692-10770192	putative_enhancer	enhancer	20646	1804	401	7	572676	0.000778517
chrI:10231572-10232072	unassigned_promoter	promoter	19617	748	124	chrI:9984876-9985376	putative_enhancer	enhancer	19144	1823	305	8	246696	0.000127394
chrI:10235060-10235560	coding_promoter	promoter	19623	1666	287	chrI:9733995-9734495	putative_enhancer	enhancer	18673	492	106	6	501065	9.2e-05
chrI:10235060-10235560	coding_promoter	promoter	19623	1666	287	chrI:10259793-10260293	putative_enhancer	enhancer	19669	402	66	14	24733	3.56e-06
chrI:10235060-10235560	coding_promoter	promoter	19623	1666	287	chrI:10381809-10382309	putative_enhancer	enhancer	19898	422	72	8	146749	0.000407998
chrI:10235060-10235560	coding_promoter	promoter	19623	1666	287	chrI:10409325-10409814	putative_enhancer	enhancer	19950	588	113	7	174259	0.00452152
chrI:10280514-10281014	unassigned_promoter	promoter	19709	659	151	chrI:10283423-10283923	putative_enhancer	enhancer	19714	352	84	19	2909	0.000275421
chrI:10297812-10298312	coding_promoter	promoter	19740	2032	427	chrI:9984876-9985376	putative_enhancer	enhancer	19144	1823	305	8	312936	0.020772
chrI:10297812-10298312	coding_promoter	promoter	19740	2032	427	chrI:10757870-10758370	putative_enhancer	enhancer	20624	800	173	7	460058	7.75e-05
chrI:10330389-10330785	coding_promoter	promoter	19800	516	101	chrI:9984876-9985376	putative_enhancer	enhancer	19144	1823	305	6	345461	0.021278
chrI:10400535-10401035	coding_promoter	promoter	19933	741	145	chrI:10403686-10404162	putative_enhancer	enhancer	19939	557	115	20	3139	0.00483072
chrI:10407410-10407910	unassigned_promoter	promoter	19946	786	167	chrI:10409325-10409814	putative_enhancer	enhancer	19950	588	113	33	1909	4.29e-08
chrI:10435632-10436100	coding_promoter	promoter	20000	479	116	chrI:10562421-10562894	putative_enhancer	enhancer	20248	1396	334	8	126791	0.000534457
chrI:10516936-10517436	coding_promoter	promoter	20159	869	174	chrI:10562421-10562894	putative_enhancer	enhancer	20248	1396	334	10	45471	0.0424001
chrI:10539085-10539565	coding_promoter	promoter	20202	1532	296	chrI:9984876-9985376	putative_enhancer	enhancer	19144	1823	305	8	554199	0.000117883
chrI:10539085-10539565	coding_promoter	promoter	20202	1532	296	chrI:10562421-10562894	putative_enhancer	enhancer	20248	1396	334	23	23332	3.31e-10
chrI:10539085-10539565	coding_promoter	promoter	20202	1532	296	chrI:10769692-10770192	putative_enhancer	enhancer	20646	1804	401	11	230617	9.43e-07
chrI:10553661-10554161	coding_promoter	promoter	20230	1226	260	chrI:10561321-10561795	putative_enhancer	enhancer	20246	385	65	14	7647	0.0132486
chrI:10553661-10554161	coding_promoter	promoter	20230	1226	260	chrI:10562421-10562894	putative_enhancer	enhancer	20248	1396	334	58	8746	8.29e-11
chrI:10560620-10560924	unassigned_promoter	promoter	20244	344	79	chrI:10562421-10562894	putative_enhancer	enhancer	20248	1396	334	26	1885	0.0101903
chrI:10585239-10585739	coding_promoter	promoter	20292	880	209	chrI:10587450-10587863	putative_enhancer	enhancer	20295	389	68	37	2167	8.29e-11
chrI:10585239-10585739	coding_promoter	promoter	20292	880	209	chrI:10691743-10692243	putative_enhancer	enhancer	20498	549	93	7	106504	0.0139537
chrI:1061904-1062404	coding_promoter	promoter	2042	1064	318	chrI:999035-999535	putative_enhancer	enhancer	1921	1300	255	12	62869	2.77e-05
chrI:1061904-1062404	coding_promoter	promoter	2042	1064	318	chrI:1069068-1069529	putative_enhancer	enhancer	2056	388	130	28	7144	8.29e-11
chrI:1061904-1062404	coding_promoter	promoter	2042	1064	318	chrI:1069912-1070333	putative_enhancer	enhancer	2058	891	272	57	7968	8.29e-11
chrI:1066890-1067390	coding_promoter	promoter	2052	368	92	chrI:1069912-1070333	putative_enhancer	enhancer	2058	891	272	26	2982	3.48e-09
chrI:1068116-1068616	coding_promoter	promoter	2054	2013	512	chrI:851958-852327	putative_enhancer	enhancer	1635	545	135	8	216224	0.000168399
chrI:1068116-1068616	coding_promoter	promoter	2054	2013	512	chrI:999035-999535	putative_enhancer	enhancer	1921	1300	255	15	69081	9.26e-07
chrI:1068116-1068616	coding_promoter	promoter	2054	2013	512	chrI:1069912-1070333	putative_enhancer	enhancer	2058	891	272	121	1756	8.29e-11
chrI:1068116-1068616	coding_promoter	promoter	2054	2013	512	chrI:1077159-1077659	putative_enhancer	enhancer	2072	272	74	19	9043	6.1e-06
chrI:1068116-1068616	coding_promoter	promoter	2054	2013	512	chrI:1226101-1226535	putative_enhancer	enhancer	2360	280	83	9	157952	1.21e-06
chrI:1068116-1068616	coding_promoter	promoter	2054	2013	512	chrI:1690937-1691328	putative_enhancer	enhancer	3253	934	171	7	622766	0.000299221
chrI:1068116-1068616	coding_promoter	promoter	2054	2013	512	chrI:1836713-1837213	putative_enhancer	enhancer	3532	1837	542	8	768597	8.27e-05
chrI:1069529-1069912	coding_promoter	promoter	2057	622	186	chrI:1836713-1837213	putative_enhancer	enhancer	3532	1837	542	9	767243	8.29e-11
chrI:10733559-10733963	coding_promoter	promoter	20578	698	117	chrI:10757870-10758370	putative_enhancer	enhancer	20624	800	173	10	24359	0.00277489
chrI:10733559-10733963	coding_promoter	promoter	20578	698	117	chrI:10769692-10770192	putative_enhancer	enhancer	20646	1804	401	11	36181	0.0213299
chrI:10733559-10733963	coding_promoter	promoter	20578	698	117	chrI:10777281-10777781	putative_enhancer	enhancer	20662	870	140	12	43770	3.11e-07
chrI:10744191-10744691	coding_promoter	promoter	20600	268	61	chrI:10746338-10746838	putative_enhancer	enhancer	20604	335	93	13	2147	0.0128877
chrI:10744191-10744691	coding_promoter	promoter	20600	268	61	chrI:10761649-10762104	putative_enhancer	enhancer	20631	499	88	12	17435	7.46e-10
chrI:10744191-10744691	coding_promoter	promoter	20600	268	61	chrI:10769692-10770192	putative_enhancer	enhancer	20646	1804	401	10	25501	0.000373499
chrI:10749796-10750296	coding_promoter	promoter	20609	660	125	chrI:10769692-10770192	putative_enhancer	enhancer	20646	1804	401	18	19896	1.91e-08
chrI:10752993-10753305	unassigned_promoter	promoter	20615	384	68	chrI:10757870-10758370	putative_enhancer	enhancer	20624	800	173	17	4971	4.39e-09
chrI:10752993-10753305	unassigned_promoter	promoter	20615	384	68	chrI:10777281-10777781	putative_enhancer	enhancer	20662	870	140	15	24382	8.29e-11
chrI:10756863-10757363	unassigned_promoter	promoter	20622	1630	327	chrI:10757870-10758370	putative_enhancer	enhancer	20624	800	173	67	1007	8.29e-11
chrI:10756863-10757363	unassigned_promoter	promoter	20622	1630	327	chrI:10760187-10760607	putative_enhancer	enhancer	20628	400	95	23	3284	5.21e-05
chrI:10756863-10757363	unassigned_promoter	promoter	20622	1630	327	chrI:10760607-10761027	putative_enhancer	enhancer	20629	421	79	23	3704	1.35e-06
chrI:10756863-10757363	unassigned_promoter	promoter	20622	1630	327	chrI:10761649-10762104	putative_enhancer	enhancer	20631	499	88	27	4763	1.16e-09
chrI:10756863-10757363	unassigned_promoter	promoter	20622	1630	327	chrI:10765614-10766114	putative_enhancer	enhancer	20639	556	140	16	8751	0.00195364
chrI:10756863-10757363	unassigned_promoter	promoter	20622	1630	327	chrI:10766582-10767011	putative_enhancer	enhancer	20641	414	102	15	9683	4.21e-06
chrI:10756863-10757363	unassigned_promoter	promoter	20622	1630	327	chrI:10768624-10769071	putative_enhancer	enhancer	20644	439	112	13	11734	0.00204741
chrI:10756863-10757363	unassigned_promoter	promoter	20622	1630	327	chrI:10769692-10770192	putative_enhancer	enhancer	20646	1804	401	50	12829	8.29e-11
chrI:10756863-10757363	unassigned_promoter	promoter	20622	1630	327	chrI:10777281-10777781	putative_enhancer	enhancer	20662	870	140	26	20418	8.29e-11
chrI:10816178-10816678	coding_promoter	promoter	20736	770	119	chrI:10833268-10833768	putative_enhancer	enhancer	20768	444	54	13	17090	0.000341098
chrI:1100534-1101034	coding_promoter	promoter	2118	302	79	chrI:1102093-1102593	putative_enhancer	enhancer	2121	186	38	14	1559	0.0191817
chrI:11062735-11063235	coding_promoter	promoter	21215	442	83	chrI:11091946-11092391	putative_enhancer	enhancer	21272	333	103	8	29183	0.00899134
chrI:11095591-11096091	unassigned_promoter	promoter	21278	1295	259	chrI:11105518-11106018	putative_enhancer	enhancer	21297	261	55	30	9927	8.29e-11
chrI:11095591-11096091	unassigned_promoter	promoter	21278	1295	259	chrI:11107758-11108258	putative_enhancer	enhancer	21300	195	42	13	12167	0.0325159
chrI:11095591-11096091	unassigned_promoter	promoter	21278	1295	259	chrI:11188001-11188501	putative_enhancer	enhancer	21455	765	206	11	92410	2.83e-05
chrI:11095591-11096091	unassigned_promoter	promoter	21278	1295	259	chrI:11203164-11203664	putative_enhancer	enhancer	21483	779	174	8	107573	0.0312386
chrI:11097-11597	coding_promoter	promoter	22	401	123	chrI:42925-43333	putative_enhancer	enhancer	80	326	80	7	31782	0.0467628
chrI:11169490-11169990	unassigned_promoter	promoter	21419	611	112	chrI:11188001-11188501	putative_enhancer	enhancer	21455	765	206	13	18511	0.0017442
chrI:11169490-11169990	unassigned_promoter	promoter	21419	611	112	chrI:11196574-11196960	putative_enhancer	enhancer	21471	511	97	11	27027	1.92e-05
chrI:11169490-11169990	unassigned_promoter	promoter	21419	611	112	chrI:11203164-11203664	putative_enhancer	enhancer	21483	779	174	12	33674	2.42e-05
chrI:11187001-11187501	coding_promoter	promoter	21453	374	86	chrI:11188001-11188501	putative_enhancer	enhancer	21455	765	206	49	1000	8.29e-11
chrI:11198533-11198995	non-coding_RNA	promoter	21475	274	79	chrI:11203164-11203664	putative_enhancer	enhancer	21483	779	174	15	4650	0.00913022
chrI:11783448-11783948	unassigned_promoter	promoter	22613	601	87	chrI:11789379-11789879	putative_enhancer	enhancer	22625	467	91	14	5931	0.0479246
chrI:11792687-11793187	coding_promoter	promoter	22631	1320	236	chrI:11840660-11841160	putative_enhancer	enhancer	22721	831	170	16	47973	1.34e-08
chrI:11792687-11793187	coding_promoter	promoter	22631	1320	236	chrI:11875986-11876486	putative_enhancer	enhancer	22789	510	111	10	83299	2.8e-05
chrI:11836149-11836649	coding_promoter	promoter	22713	238	49	chrI:11842352-11842852	putative_enhancer	enhancer	22724	288	65	13	6203	8.38e-07
chrI:11870006-11870506	unassigned_promoter	promoter	22779	606	96	chrI:11874843-11875238	putative_enhancer	enhancer	22787	288	55	24	4784	8.29e-11
chrI:11870006-11870506	unassigned_promoter	promoter	22779	606	96	chrI:11875986-11876486	putative_enhancer	enhancer	22789	510	111	24	5980	8.29e-11
chrI:11871662-11872162	unassigned_promoter	promoter	22782	281	76	chrI:11875986-11876486	putative_enhancer	enhancer	22789	510	111	13	4324	0.0202937
chrI:11873011-11873511	unassigned_promoter	promoter	22784	655	105	chrI:11875986-11876486	putative_enhancer	enhancer	22789	510	111	34	2975	8.29e-11
chrI:11934083-11934583	unassigned_promoter	promoter	22902	1349	265	chrI:11937233-11937613	putative_enhancer	enhancer	22908	393	79	48	3090	8.29e-11
chrI:11934083-11934583	unassigned_promoter	promoter	22902	1349	265	chrI:11962898-11963398	putative_enhancer	enhancer	22958	309	70	10	28815	0.00829613
chrI:12039685-12040185	coding_promoter	promoter	23109	2022	485	chrI:12576174-12576674	putative_enhancer	enhancer	24152	575	120	7	536489	0.000315711
chrI:1229159-1229608	coding_promoter	promoter	2365	1023	210	chrI:1251400-1251900	putative_enhancer	enhancer	2408	811	168	30	22267	8.29e-11
chrI:1229159-1229608	coding_promoter	promoter	2365	1023	210	chrI:1255891-1256391	putative_enhancer	enhancer	2417	518	110	15	26758	7.29e-09
chrI:1229159-1229608	coding_promoter	promoter	2365	1023	210	chrI:1271332-1271761	putative_enhancer	enhancer	2445	308	87	8	42163	0.00380155
chrI:1229159-1229608	coding_promoter	promoter	2365	1023	210	chrI:1273775-1274275	putative_enhancer	enhancer	2449	707	216	12	44642	8.21e-06
chrI:1229159-1229608	coding_promoter	promoter	2365	1023	210	chrI:1299917-1300417	putative_enhancer	enhancer	2498	364	99	7	70784	0.0218833
chrI:1229159-1229608	coding_promoter	promoter	2365	1023	210	chrI:1690937-1691328	putative_enhancer	enhancer	3253	934	171	6	461749	0.00388683
chrI:1229159-1229608	coding_promoter	promoter	2365	1023	210	chrI:1836713-1837213	putative_enhancer	enhancer	3532	1837	542	13	607580	8.29e-11
chrI:1230304-1230739	coding_promoter	promoter	2367	383	93	chrI:1251400-1251900	putative_enhancer	enhancer	2408	811	168	18	21129	8.29e-11
chrI:1230304-1230739	coding_promoter	promoter	2367	383	93	chrI:1271332-1271761	putative_enhancer	enhancer	2445	308	87	6	41025	0.0264398
chrI:1230304-1230739	coding_promoter	promoter	2367	383	93	chrI:1273775-1274275	putative_enhancer	enhancer	2449	707	216	10	43504	2.46e-06
chrI:12508126-12508608	coding_promoter	promoter	24021	369	60	chrI:12534344-12534844	putative_enhancer	enhancer	24071	594	110	9	26227	0.00129825
chrI:12524254-12524754	coding_promoter	promoter	24051	1750	398	chrI:12534344-12534844	putative_enhancer	enhancer	24071	594	110	35	10090	8.29e-11
chrI:12524254-12524754	coding_promoter	promoter	24051	1750	398	chrI:12572256-12572706	putative_enhancer	enhancer	24144	612	111	12	47977	0.000134899
chrI:12524254-12524754	coding_promoter	promoter	24051	1750	398	chrI:13031334-13031834	putative_enhancer	enhancer	25023	658	92	6	507080	0.0128001
chrI:12550990-12551490	coding_promoter	promoter	24104	878	128	chrI:12571802-12572192	putative_enhancer	enhancer	24143	388	79	10	20757	0.000478617
chrI:12575613-12576113	coding_promoter	promoter	24151	988	215	chrI:13040381-13040881	putative_enhancer	enhancer	25038	842	209	6	464768	0.00489262
chrI:12575613-12576113	coding_promoter	promoter	24151	988	215	chrI:13348949-13349449	putative_enhancer	enhancer	25641	952	158	6	773336	0.000785901
chrI:1270904-1271332	coding_promoter	promoter	2444	578	134	chrI:1273775-1274275	putative_enhancer	enhancer	2449	707	216	55	2907	8.29e-11
chrI:1270904-1271332	coding_promoter	promoter	2444	578	134	chrI:1295375-1295875	putative_enhancer	enhancer	2490	379	82	9	24507	0.00143181
chrI:1270904-1271332	coding_promoter	promoter	2444	578	134	chrI:1299917-1300417	putative_enhancer	enhancer	2498	364	99	10	29049	1.24e-05
chrI:1270904-1271332	coding_promoter	promoter	2444	578	134	chrI:1302839-1303339	putative_enhancer	enhancer	2504	199	45	9	31971	7.12e-06
chrI:1272377-1272877	unassigned_promoter	promoter	2447	279	65	chrI:1273775-1274275	putative_enhancer	enhancer	2449	707	216	34	1398	8.29e-11
chrI:12736558-12737058	coding_promoter	promoter	24461	1701	392	chrI:13036423-13036923	putative_enhancer	enhancer	25031	827	170	10	299865	2.94e-07
chrI:12736558-12737058	coding_promoter	promoter	24461	1701	392	chrI:13040381-13040881	putative_enhancer	enhancer	25038	842	209	9	303823	5.1e-05
chrI:12736558-12737058	coding_promoter	promoter	24461	1701	392	chrI:13348949-13349449	putative_enhancer	enhancer	25641	952	158	6	612391	0.0290505
chrI:12815712-12816212	coding_promoter	promoter	24612	2658	722	chrI:12845631-12846131	putative_enhancer	enhancer	24668	261	51	12	29919	0.0170396
chrI:12815712-12816212	coding_promoter	promoter	24612	2658	722	chrI:12893241-12893741	putative_enhancer	enhancer	24761	229	48	10	77529	5.07e-05
chrI:12815712-12816212	coding_promoter	promoter	24612	2658	722	chrI:13031334-13031834	putative_enhancer	enhancer	25023	658	92	14	215622	8.29e-11
chrI:12815712-12816212	coding_promoter	promoter	24612	2658	722	chrI:13032488-13032988	putative_enhancer	enhancer	25025	676	106	9	216776	0.000335111
chrI:12815712-12816212	coding_promoter	promoter	24612	2658	722	chrI:13040381-13040881	putative_enhancer	enhancer	25038	842	209	17	224669	8.29e-11
chrI:12815712-12816212	coding_promoter	promoter	24612	2658	722	chrI:13350913-13351413	putative_enhancer	enhancer	25645	1262	272	10	535201	1.36e-06
chrI:12815712-12816212	coding_promoter	promoter	24612	2658	722	chrI:13369529-13369960	putative_enhancer	enhancer	25682	1316	285	9	553782	1.8e-05
chrI:12826471-12826971	coding_promoter	promoter	24631	1212	248	chrI:13032488-13032988	putative_enhancer	enhancer	25025	676	106	7	206017	0.00316015
chrI:12844031-12844531	coding_promoter	promoter	24665	208	52	chrI:12845631-12846131	putative_enhancer	enhancer	24668	261	51	21	1600	4.68e-06
chrI:12876958-12877458	coding_promoter	promoter	24729	1331	265	chrI:13036423-13036923	putative_enhancer	enhancer	25031	827	170	8	159465	0.0082507
chrI:12876958-12877458	coding_promoter	promoter	24729	1331	265	chrI:13040381-13040881	putative_enhancer	enhancer	25038	842	209	8	163423	0.0306476
chrI:12917989-12918489	coding_promoter	promoter	24806	563	90	chrI:12920584-12920959	putative_enhancer	enhancer	24811	447	119	27	2532	3.82e-07
chrI:12937594-12938094	coding_promoter	promoter	24845	704	141	chrI:12949693-12950193	putative_enhancer	enhancer	24869	350	88	21	12099	8.29e-11
chrI:12937594-12938094	coding_promoter	promoter	24845	704	141	chrI:12973054-12973554	putative_enhancer	enhancer	24914	452	87	11	35460	2.24e-05
chrI:12937594-12938094	coding_promoter	promoter	24845	704	141	chrI:13032488-13032988	putative_enhancer	enhancer	25025	676	106	7	94894	0.0075009
chrI:12966222-12966688	coding_promoter	promoter	24901	723	206	chrI:13040381-13040881	putative_enhancer	enhancer	25038	842	209	10	74176	0.000117408
chrI:12966688-12967155	coding_promoter	promoter	24902	697	150	chrI:12973054-12973554	putative_enhancer	enhancer	24914	452	87	20	6383	1.29e-05
chrI:12966688-12967155	coding_promoter	promoter	24902	697	150	chrI:13036423-13036923	putative_enhancer	enhancer	25031	827	170	9	69752	0.000628059
chrI:12973905-12974405	coding_promoter	promoter	24915	241	48	chrI:13060273-13060773	putative_enhancer	enhancer	25076	489	135	6	86368	0.00602556
chrI:1301393-1301893	unassigned_promoter	promoter	2501	533	99	chrI:1368647-1369147	putative_enhancer	enhancer	2629	281	79	11	67254	2.49e-10
chrI:13062512-13063012	coding_promoter	promoter	25079	469	112	chrI:13063974-13064474	putative_enhancer	enhancer	25082	495	132	28	1462	0.000207912
chrI:13289639-13290139	coding_promoter	promoter	25529	341	84	chrI:13290795-13291295	putative_enhancer	enhancer	25531	764	156	36	1156	0.00031621
chrI:13310181-13310627	non-coding_RNA	promoter	25568	457	82	chrI:13369529-13369960	putative_enhancer	enhancer	25682	1316	285	8	59340	0.0495553
chrI:13337043-13337543	coding_promoter	promoter	25619	1479	307	chrI:13348949-13349449	putative_enhancer	enhancer	25641	952	158	62	11906	8.29e-11
chrI:13337043-13337543	coding_promoter	promoter	25619	1479	307	chrI:13350913-13351413	putative_enhancer	enhancer	25645	1262	272	69	13870	8.29e-11
chrI:13337043-13337543	coding_promoter	promoter	25619	1479	307	chrI:13369529-13369960	putative_enhancer	enhancer	25682	1316	285	29	32451	8.29e-11
chrI:13338810-13339258	coding_promoter	promoter	25622	450	86	chrI:13348949-13349449	putative_enhancer	enhancer	25641	952	158	15	10165	0.00151594
chrI:13338810-13339258	coding_promoter	promoter	25622	450	86	chrI:13350913-13351413	putative_enhancer	enhancer	25645	1262	272	18	12129	4.93e-06
chrI:13368901-13369388	unassigned_promoter	promoter	25681	526	110	chrI:13371447-13371854	putative_enhancer	enhancer	25686	356	91	16	2506	0.0105396
chrI:13368901-13369388	unassigned_promoter	promoter	25681	526	110	chrI:13381385-13381885	putative_enhancer	enhancer	25704	357	92	13	12491	8.16e-06
chrI:13372854-13373354	coding_promoter	promoter	25689	2404	485	chrI:13381385-13381885	putative_enhancer	enhancer	25704	357	92	23	8531	1.25e-05
chrI:13372854-13373354	coding_promoter	promoter	25689	2404	485	chrI:13500176-13500676	putative_enhancer	enhancer	25933	183	67	7	127322	0.0106076
chrI:13411334-13411742	coding_promoter	promoter	25761	537	133	chrI:13434177-13434677	putative_enhancer	enhancer	25804	292	73	11	22889	2.84e-06
chrI:13475372-13475872	coding_promoter	promoter	25885	845	240	chrI:13490978-13491478	putative_enhancer	enhancer	25916	294	98	21	15606	8.29e-11
chrI:13494991-13495491	unassigned_promoter	promoter	25923	363	114	chrI:13500840-13501340	putative_enhancer	enhancer	25934	216	69	15	5849	3.61e-06
chrI:13533769-13534269	coding_promoter	promoter	25999	425	90	chrI:13545884-13546384	putative_enhancer	enhancer	26022	252	80	10	12115	0.0260097
chrI:1361126-1361626	coding_promoter	promoter	2615	952	316	chrI:1365250-1365750	putative_enhancer	enhancer	2623	177	61	31	4124	8.29e-11
chrI:1361126-1361626	coding_promoter	promoter	2615	952	316	chrI:1368647-1369147	putative_enhancer	enhancer	2629	281	79	19	7521	1.18e-06
chrI:1361126-1361626	coding_promoter	promoter	2615	952	316	chrI:1540419-1540820	putative_enhancer	enhancer	2963	640	195	10	179243	1.25e-07
chrI:1361126-1361626	coding_promoter	promoter	2615	952	316	chrI:1836713-1837213	putative_enhancer	enhancer	3532	1837	542	8	475587	5.17e-05
chrI:13663156-13663603	coding_promoter	promoter	26250	838	178	chrI:13688505-13688958	putative_enhancer	enhancer	26299	592	128	15	25352	2.47e-05
chrI:13663156-13663603	coding_promoter	promoter	26250	838	178	chrI:14528608-14529108	putative_enhancer	enhancer	27926	420	133	6	865479	0.000126329
chrI:14050968-14051415	coding_promoter	promoter	27002	391	70	chrI:14077510-14078010	putative_enhancer	enhancer	27052	326	45	13	26569	2.49e-10
chrI:14051712-14052212	unassigned_promoter	promoter	27003	465	83	chrI:14077510-14078010	putative_enhancer	enhancer	27052	326	45	10	25798	8.57e-05
chrI:14074253-14074753	unassigned_promoter	promoter	27046	539	72	chrI:14845499-14845974	putative_enhancer	enhancer	28544	1206	348	7	771233	5.4e-06
chrI:14075449-14075949	coding_promoter	promoter	27048	533	80	chrI:14077510-14078010	putative_enhancer	enhancer	27052	326	45	23	2061	0.000640072
chrI:14179569-14180069	unassigned_promoter	promoter	27249	1072	215	chrI:14261870-14262370	putative_enhancer	enhancer	27410	647	149	8	82301	0.0470863
chrI:14181012-14181512	coding_promoter	promoter	27252	1023	242	chrI:14260426-14260908	putative_enhancer	enhancer	27407	494	107	9	79405	0.00115889
chrI:14181012-14181512	coding_promoter	promoter	27252	1023	242	chrI:14261870-14262370	putative_enhancer	enhancer	27410	647	149	10	80858	0.000115558
chrI:14320277-14320777	coding_promoter	promoter	27522	603	155	chrI:14323495-14323995	putative_enhancer	enhancer	27528	390	83	54	3218	8.29e-11
chrI:14346512-14347012	coding_promoter	promoter	27573	635	188	chrI:14388722-14389222	putative_enhancer	enhancer	27655	258	64	13	42210	7.46e-10
chrI:1435488-1435917	pseudogene_promoter	promoter	2759	352	103	chrI:999035-999535	putative_enhancer	enhancer	1921	1300	255	6	436417	0.000354709
chrI:14465121-14465621	coding_promoter	promoter	27803	402	98	chrI:14528608-14529108	putative_enhancer	enhancer	27926	420	133	7	63487	0.0170479
chrI:14520426-14520909	unassigned_promoter	promoter	27913	471	140	chrI:14528608-14529108	putative_enhancer	enhancer	27926	420	133	17	8191	7.51e-06
chrI:14520426-14520909	unassigned_promoter	promoter	27913	471	140	chrI:14612587-14613087	putative_enhancer	enhancer	28090	743	222	13	92170	8.29e-11
chrI:14530724-14531224	coding_promoter	promoter	27930	352	106	chrI:14532815-14533315	putative_enhancer	enhancer	27934	364	99	44	2091	8.29e-11
chrI:14625605-14626101	coding_promoter	promoter	28114	510	190	chrI:14627927-14628427	putative_enhancer	enhancer	28119	481	185	24	2324	0.0337707
chrI:14625605-14626101	coding_promoter	promoter	28114	510	190	chrI:14656996-14657496	putative_enhancer	enhancer	28174	383	83	18	31393	8.29e-11
chrI:14630892-14631392	coding_promoter	promoter	28125	373	102	chrI:14632486-14632895	putative_enhancer	enhancer	28128	224	70	31	1548	8.29e-11
chrI:14647360-14647860	coding_promoter	promoter	28157	783	198	chrI:14656996-14657496	putative_enhancer	enhancer	28174	383	83	23	9636	2.82e-09
chrI:1470948-1471448	coding_promoter	promoter	2828	364	82	chrI:1584978-1585478	putative_enhancer	enhancer	3048	231	69	7	114030	2.06e-06
chrI:14759277-14759767	coding_promoter	promoter	28374	646	208	chrI:14845499-14845974	putative_enhancer	enhancer	28544	1206	348	15	86214	2.49e-10
chrI:14768765-14769265	coding_promoter	promoter	28392	658	234	chrI:14845499-14845974	putative_enhancer	enhancer	28544	1206	348	9	76721	0.0154734
chrI:14789830-14790266	coding_promoter	promoter	28433	491	151	chrI:14845499-14845974	putative_enhancer	enhancer	28544	1206	348	10	55688	0.00446255
chrI:1481435-1481935	coding_promoter	promoter	2848	605	188	chrI:1836713-1837213	putative_enhancer	enhancer	3532	1837	542	6	355278	0.0331871
chrI:14844466-14844849	coding_promoter	promoter	28541	421	106	chrI:14845499-14845974	putative_enhancer	enhancer	28544	1206	348	44	1079	0.0020167
chrI:14844466-14844849	coding_promoter	promoter	28541	421	106	chrI:14907846-14908346	putative_enhancer	enhancer	28664	360	109	6	63439	0.0141887
chrI:14902731-14903193	coding_promoter	promoter	28655	676	203	chrI:14924495-14924995	putative_enhancer	enhancer	28696	683	173	12	21783	0.00135237
chrI:14917306-14917806	coding_promoter	promoter	28682	347	119	chrI:14924495-14924995	putative_enhancer	enhancer	28696	683	173	16	7189	6.28e-05
chrI:1558999-1559499	coding_promoter	promoter	2999	942	234	chrI:1563939-1564439	putative_enhancer	enhancer	3009	423	89	40	4940	8.29e-11
chrI:1558999-1559499	coding_promoter	promoter	2999	942	234	chrI:1565048-1565548	putative_enhancer	enhancer	3011	255	63	21	6049	3.31e-10
chrI:1558999-1559499	coding_promoter	promoter	2999	942	234	chrI:1584978-1585478	putative_enhancer	enhancer	3048	231	69	13	25979	3.22e-08
chrI:1562466-1562966	coding_promoter	promoter	3006	620	129	chrI:1563939-1564439	putative_enhancer	enhancer	3009	423	89	47	1473	8.29e-11
chrI:1562466-1562966	coding_promoter	promoter	3006	620	129	chrI:1565048-1565548	putative_enhancer	enhancer	3011	255	63	18	2582	1.3e-05
chrI:1575447-1575947	non-coding_RNA	promoter	3031	244	64	chrI:1584978-1585478	putative_enhancer	enhancer	3048	231	69	9	9531	0.0112694
chrI:1598385-1598885	coding_promoter	promoter	3074	246	103	chrI:1691328-1691720	putative_enhancer	enhancer	3254	726	176	6	92889	0.00338777
chrI:1628462-1628962	coding_promoter	promoter	3133	516	116	chrI:1690937-1691328	putative_enhancer	enhancer	3253	934	171	9	62420	0.000541233
chrI:1651207-1651707	coding_promoter	promoter	3177	498	124	chrI:1836713-1837213	putative_enhancer	enhancer	3532	1837	542	7	185506	0.0201258
chrI:166795-167295	coding_promoter	promoter	318	317	77	chrI:171600-172006	putative_enhancer	enhancer	326	146	54	11	4758	0.0023864
chrI:166795-167295	coding_promoter	promoter	318	317	77	chrI:172672-173088	putative_enhancer	enhancer	329	513	122	16	5835	0.000222324
chrI:1676413-1676913	coding_promoter	promoter	3225	595	123	chrI:1690937-1691328	putative_enhancer	enhancer	3253	934	171	23	14469	8.29e-11
chrI:1676413-1676913	coding_promoter	promoter	3225	595	123	chrI:1691328-1691720	putative_enhancer	enhancer	3254	726	176	14	14861	4.52e-06
chrI:16783-17283	unassigned_promoter	promoter	32	379	132	chrI:74531-75031	putative_enhancer	enhancer	141	228	85	6	57748	0.0149137
chrI:1687569-1688069	coding_promoter	promoter	3247	408	80	chrI:1690937-1691328	putative_enhancer	enhancer	3253	934	171	40	3313	8.29e-11
chrI:1687569-1688069	coding_promoter	promoter	3247	408	80	chrI:1691328-1691720	putative_enhancer	enhancer	3254	726	176	25	3705	8.29e-11
chrI:1697818-1698318	coding_promoter	promoter	3266	1895	406	chrI:1777266-1777766	putative_enhancer	enhancer	3419	380	70	9	79448	0.00113675
chrI:1697818-1698318	coding_promoter	promoter	3266	1895	406	chrI:1836713-1837213	putative_enhancer	enhancer	3532	1837	542	21	138895	8.29e-11
chrI:1718976-1719476	coding_promoter	promoter	3306	834	175	chrI:1836713-1837213	putative_enhancer	enhancer	3532	1837	542	11	117737	2.3e-06
chrI:1832484-1832938	coding_promoter	promoter	3525	433	75	chrI:1836713-1837213	putative_enhancer	enhancer	3532	1837	542	23	4252	0.00464805
chrI:1835358-1835858	coding_promoter	promoter	3530	1326	284	chrI:1836713-1837213	putative_enhancer	enhancer	3532	1837	542	197	1355	8.29e-11
chrI:1835358-1835858	coding_promoter	promoter	3530	1326	284	chrI:1841834-1842297	putative_enhancer	enhancer	3541	463	110	23	6457	3.5e-08
chrI:1836166-1836666	unassigned_promoter	promoter	3531	1098	289	chrI:1841834-1842297	putative_enhancer	enhancer	3541	463	110	17	5649	0.0135183
chrI:1873685-1874185	coding_promoter	promoter	3602	2088	447	chrI:1911548-1912048	putative_enhancer	enhancer	3676	266	58	10	37863	0.00526444
chrI:1873685-1874185	coding_promoter	promoter	3602	2088	447	chrI:2587475-2587975	putative_enhancer	enhancer	4996	1041	196	8	713790	3.48e-05
chrI:1913811-1914311	coding_promoter	promoter	3680	472	80	chrI:1915788-1916288	putative_enhancer	enhancer	3684	275	58	42	1977	8.29e-11
chrI:2019330-2019830	coding_promoter	promoter	3890	400	78	chrI:2291404-2291829	putative_enhancer	enhancer	4418	308	74	7	272036	6.39e-08
chrI:2024523-2025023	unassigned_promoter	promoter	3899	680	132	chrI:2125047-2125547	putative_enhancer	enhancer	4093	381	80	11	100524	8.29e-11
chrI:2070671-2071147	coding_promoter	promoter	3988	524	97	chrI:2076789-2077289	putative_enhancer	enhancer	4000	456	132	22	6130	1.16e-09
chrI:2119206-2119706	coding_promoter	promoter	4082	400	101	chrI:2120568-2121068	putative_enhancer	enhancer	4084	263	61	23	1362	2.55e-07
chrI:2119206-2119706	coding_promoter	promoter	4082	400	101	chrI:2125047-2125547	putative_enhancer	enhancer	4093	381	80	21	5841	8.29e-11
chrI:2155406-2155857	unassigned_promoter	promoter	4152	827	203	chrI:2167730-2168230	putative_enhancer	enhancer	4177	182	38	11	12349	0.00149515
chrI:2155406-2155857	unassigned_promoter	promoter	4152	827	203	chrI:2179787-2180287	putative_enhancer	enhancer	4200	270	83	14	24406	3.56e-09
chrI:2155406-2155857	unassigned_promoter	promoter	4152	827	203	chrI:2184742-2185242	putative_enhancer	enhancer	4210	322	53	18	29361	8.29e-11
chrI:2421600-2422100	coding_promoter	promoter	4670	437	89	chrI:2587475-2587975	putative_enhancer	enhancer	4996	1041	196	6	165875	0.0452599
chrI:2586181-2586585	coding_promoter	promoter	4994	592	96	chrI:2587475-2587975	putative_enhancer	enhancer	4996	1041	196	77	1342	8.29e-11
chrI:2598351-2598758	coding_promoter	promoter	5017	525	114	chrI:2639568-2640068	putative_enhancer	enhancer	5096	357	82	9	41264	5.24e-05
chrI:2656946-2657446	coding_promoter	promoter	5128	529	116	chrI:2659873-2660289	putative_enhancer	enhancer	5134	302	69	15	2885	0.00455022
chrI:2667739-2668164	coding_promoter	promoter	5147	791	173	chrI:2831748-2832164	putative_enhancer	enhancer	5461	528	98	6	164005	0.015996
chrI:2703116-2703616	coding_promoter	promoter	5215	520	97	chrI:2708151-2708651	putative_enhancer	enhancer	5224	288	83	16	5035	0.000134781
chrI:2726548-2726934	coding_promoter	promoter	5260	424	65	chrI:2835181-2835632	putative_enhancer	enhancer	5467	425	89	6	108665	0.00243572
chrI:2728604-2729104	coding_promoter	promoter	5264	694	155	chrI:2863907-2864407	putative_enhancer	enhancer	5517	940	225	7	135303	0.0174856
chrI:2800681-2801181	coding_promoter	promoter	5401	512	120	chrI:2835181-2835632	putative_enhancer	enhancer	5467	425	89	10	34475	1.39e-05
chrI:2850675-2851175	unassigned_promoter	promoter	5493	383	89	chrI:2863907-2864407	putative_enhancer	enhancer	5517	940	225	18	13232	6.38e-08
chrI:2857528-2858028	coding_promoter	promoter	5506	498	112	chrI:2863907-2864407	putative_enhancer	enhancer	5517	940	225	27	6379	1.66e-10
chrI:2860953-2861453	coding_promoter	promoter	5512	384	92	chrI:2863907-2864407	putative_enhancer	enhancer	5517	940	225	38	2954	8.29e-11
chrI:288936-289436	coding_promoter	promoter	549	459	138	chrI:299597-300097	putative_enhancer	enhancer	567	558	158	17	10661	2.3e-07
chrI:288936-289436	coding_promoter	promoter	549	459	138	chrI:310727-311172	putative_enhancer	enhancer	587	385	112	10	21763	0.000869878
chrI:2935486-2935986	coding_promoter	promoter	5658	541	137	chrI:2960443-2960943	putative_enhancer	enhancer	5707	288	60	10	24957	0.000110462
chrI:3118925-3119425	coding_promoter	promoter	6012	579	110	chrI:3121576-3121979	putative_enhancer	enhancer	6017	142	42	14	2602	0.0479553
chrI:3248112-3248475	coding_promoter	promoter	6265	430	99	chrI:3251039-3251502	putative_enhancer	enhancer	6271	237	40	15	2977	6.12e-06
chrI:3277720-3278220	coding_promoter	promoter	6323	330	79	chrI:3280638-3281138	putative_enhancer	enhancer	6329	225	52	15	2918	0.0442671
chrI:3309517-3310017	coding_promoter	promoter	6383	458	87	chrI:3334384-3334884	putative_enhancer	enhancer	6430	841	176	23	24867	8.29e-11
chrI:3316444-3316944	coding_promoter	promoter	6397	398	111	chrI:3334384-3334884	putative_enhancer	enhancer	6430	841	176	12	17940	9.11e-05
chrI:3330728-3331228	coding_promoter	promoter	6424	704	122	chrI:3334384-3334884	putative_enhancer	enhancer	6430	841	176	48	3656	8.29e-11
chrI:3332594-3333094	unassigned_promoter	promoter	6427	485	74	chrI:3334384-3334884	putative_enhancer	enhancer	6430	841	176	51	1790	8.29e-11
chrI:3514223-3514723	coding_promoter	promoter	6779	1096	184	chrI:3515369-3515869	putative_enhancer	enhancer	6781	253	45	34	1146	0.00320436
chrI:3647997-3648497	coding_promoter	promoter	7039	996	241	chrI:3650615-3651115	putative_enhancer	enhancer	7043	252	74	37	2618	8.29e-11
chrI:3647997-3648497	coding_promoter	promoter	7039	996	241	chrI:4005650-4006033	putative_enhancer	enhancer	7717	819	246	6	357594	0.00770705
chrI:3651-4126	non-coding_RNA	promoter	7	900	371	chrI:40694-41194	putative_enhancer	enhancer	76	213	82	8	37056	0.0089166
chrI:3651-4126	non-coding_RNA	promoter	7	900	371	chrI:611527-612027	putative_enhancer	enhancer	1170	217	74	6	607889	4.55e-06
chrI:3651-4126	non-coding_RNA	promoter	7	900	371	chrI:851958-852327	putative_enhancer	enhancer	1635	545	135	6	848254	4.79e-05
chrI:3672595-3673095	coding_promoter	promoter	7084	528	92	chrI:3679929-3680429	putative_enhancer	enhancer	7097	514	113	16	7334	2.02e-05
chrI:3681866-3682366	coding_promoter	promoter	7100	831	142	chrI:3710625-3711077	putative_enhancer	enhancer	7156	251	50	10	28735	1.66e-06
chrI:3721272-3721651	coding_promoter	promoter	7176	1402	382	chrI:3738082-3738582	putative_enhancer	enhancer	7206	846	149	23	16871	8.29e-11
chrI:3721651-3722031	coding_promoter	promoter	7177	1701	447	chrI:3738082-3738582	putative_enhancer	enhancer	7206	846	149	15	16491	0.000373451
chrI:3721651-3722031	coding_promoter	promoter	7177	1701	447	chrI:3754376-3754876	putative_enhancer	enhancer	7236	691	115	11	32785	0.00195568
chrI:3723349-3723849	coding_promoter	promoter	7180	1216	228	chrI:3738082-3738582	putative_enhancer	enhancer	7206	846	149	23	14733	8.29e-11
chrI:3723349-3723849	coding_promoter	promoter	7180	1216	228	chrI:3754376-3754876	putative_enhancer	enhancer	7236	691	115	15	31027	1.24e-09
chrI:3724594-3725094	coding_promoter	promoter	7182	809	163	chrI:3738082-3738582	putative_enhancer	enhancer	7206	846	149	21	13488	8.29e-11
chrI:3724594-3725094	coding_promoter	promoter	7182	809	163	chrI:3754376-3754876	putative_enhancer	enhancer	7236	691	115	12	29782	4.4e-06
chrI:3724594-3725094	coding_promoter	promoter	7182	809	163	chrI:3822614-3823072	putative_enhancer	enhancer	7369	806	247	7	97999	0.00581905
chrI:3739230-3739663	coding_promoter	promoter	7208	331	57	chrI:3754376-3754876	putative_enhancer	enhancer	7236	691	115	12	15180	8.82e-07
chrI:3740308-3740798	coding_promoter	promoter	7210	2033	433	chrI:3754376-3754876	putative_enhancer	enhancer	7236	691	115	25	14073	8.29e-11
chrI:3740308-3740798	coding_promoter	promoter	7210	2033	433	chrI:4490353-4490853	putative_enhancer	enhancer	8645	1850	424	7	750050	0.00330053
chrI:3793314-3793814	coding_promoter	promoter	7311	392	80	chrI:3822614-3823072	putative_enhancer	enhancer	7369	806	247	8	29279	0.0185135
chrI:3806470-3806970	coding_promoter	promoter	7337	958	257	chrI:3822614-3823072	putative_enhancer	enhancer	7369	806	247	20	16123	6.63e-10
chrI:3958355-3958855	coding_promoter	promoter	7626	345	77	chrI:3959418-3959918	putative_enhancer	enhancer	7628	328	52	22	1063	0.0282242
chrI:397669-398169	coding_promoter	promoter	758	1409	394	chrI:429046-429546	putative_enhancer	enhancer	819	529	111	21	31377	8.29e-11
chrI:3982742-3983242	coding_promoter	promoter	7674	367	49	chrI:3987047-3987547	putative_enhancer	enhancer	7682	271	64	16	4305	1.98e-07
chrI:4032392-4032892	coding_promoter	promoter	7765	990	200	chrI:4490353-4490853	putative_enhancer	enhancer	8645	1850	424	6	457961	0.0353815
chrI:4035291-4035791	coding_promoter	promoter	7769	475	158	chrI:4036814-4037314	putative_enhancer	enhancer	7772	191	52	19	1523	0.00451873
chrI:4046581-4047081	unassigned_promoter	promoter	7790	482	134	chrI:4050454-4050954	putative_enhancer	enhancer	7797	314	110	23	3873	2.73e-09
chrI:4171910-4172410	coding_promoter	promoter	8032	1586	322	chrI:4490353-4490853	putative_enhancer	enhancer	8645	1850	424	8	318443	0.0103037
chrI:4178374-4178874	coding_promoter	promoter	8044	802	169	chrI:4311516-4312016	putative_enhancer	enhancer	8304	947	193	8	133142	0.000247197
chrI:4253865-4254365	unassigned_promoter	promoter	8192	1523	380	chrI:4298980-4299443	putative_enhancer	enhancer	8281	514	114	11	45096	0.000116161
chrI:4253865-4254365	unassigned_promoter	promoter	8192	1523	380	chrI:4316228-4316728	putative_enhancer	enhancer	8311	438	84	8	62363	0.0367828
chrI:4253865-4254365	unassigned_promoter	promoter	8192	1523	380	chrI:4490353-4490853	putative_enhancer	enhancer	8645	1850	424	10	236488	0.000136419
chrI:4297898-4298398	coding_promoter	promoter	8279	2277	552	chrI:4298980-4299443	putative_enhancer	enhancer	8281	514	114	75	1063	8.29e-11
chrI:4297898-4298398	coding_promoter	promoter	8279	2277	552	chrI:4299443-4299906	putative_enhancer	enhancer	8282	461	120	58	1526	8.29e-11
chrI:4297898-4298398	coding_promoter	promoter	8279	2277	552	chrI:4303752-4304252	putative_enhancer	enhancer	8290	537	103	41	5854	8.29e-11
chrI:4297898-4298398	coding_promoter	promoter	8279	2277	552	chrI:4311516-4312016	putative_enhancer	enhancer	8304	947	193	52	13618	8.29e-11
chrI:4297898-4298398	coding_promoter	promoter	8279	2277	552	chrI:4314258-4314758	putative_enhancer	enhancer	8308	498	94	22	16360	1.66e-10
chrI:4297898-4298398	coding_promoter	promoter	8279	2277	552	chrI:4316228-4316728	putative_enhancer	enhancer	8311	438	84	13	18330	0.0108426
chrI:4297898-4298398	coding_promoter	promoter	8279	2277	552	chrI:4322682-4323078	putative_enhancer	enhancer	8323	352	76	12	24732	0.000518774
chrI:4297898-4298398	coding_promoter	promoter	8279	2277	552	chrI:4323846-4324346	putative_enhancer	enhancer	8325	387	63	14	25948	1.49e-06
chrI:4297898-4298398	coding_promoter	promoter	8279	2277	552	chrI:4328791-4329250	putative_enhancer	enhancer	8334	580	140	15	30872	7.97e-07
chrI:4297898-4298398	coding_promoter	promoter	8279	2277	552	chrI:4333738-4334238	putative_enhancer	enhancer	8343	576	148	12	35840	0.0012626
chrI:4297898-4298398	coding_promoter	promoter	8279	2277	552	chrI:4334286-4334786	putative_enhancer	enhancer	8344	533	123	21	36388	8.29e-11
chrI:4297898-4298398	coding_promoter	promoter	8279	2277	552	chrI:4434560-4434972	putative_enhancer	enhancer	8539	348	81	8	136618	0.000113728
chrI:4297898-4298398	coding_promoter	promoter	8279	2277	552	chrI:4490353-4490853	putative_enhancer	enhancer	8645	1850	424	26	192455	8.29e-11
chrI:4297898-4298398	coding_promoter	promoter	8279	2277	552	chrI:4974613-4975046	putative_enhancer	enhancer	9578	503	145	8	676681	1.65e-07
chrI:4320611-4321111	coding_promoter	promoter	8319	1017	213	chrI:4322286-4322682	putative_enhancer	enhancer	8322	311	55	31	1623	9.49e-07
chrI:4320611-4321111	coding_promoter	promoter	8319	1017	213	chrI:4322682-4323078	putative_enhancer	enhancer	8323	352	76	22	2019	0.0354299
chrI:4320611-4321111	coding_promoter	promoter	8319	1017	213	chrI:4323846-4324346	putative_enhancer	enhancer	8325	387	63	18	3235	0.0225671
chrI:4320611-4321111	coding_promoter	promoter	8319	1017	213	chrI:4332098-4332598	putative_enhancer	enhancer	8340	569	127	13	11487	0.0228864
chrI:4320611-4321111	coding_promoter	promoter	8319	1017	213	chrI:4334286-4334786	putative_enhancer	enhancer	8344	533	123	14	13675	7.99e-05
chrI:4327890-4328390	unassigned_promoter	promoter	8333	547	133	chrI:4332098-4332598	putative_enhancer	enhancer	8340	569	127	15	4208	0.0039768
chrI:4330424-4330924	unassigned_promoter	promoter	8337	1031	226	chrI:4332098-4332598	putative_enhancer	enhancer	8340	569	127	33	1674	4.99e-05
chrI:4330424-4330924	unassigned_promoter	promoter	8337	1031	226	chrI:4333738-4334238	putative_enhancer	enhancer	8343	576	148	26	3314	3.27e-06
chrI:4330424-4330924	unassigned_promoter	promoter	8337	1031	226	chrI:4334286-4334786	putative_enhancer	enhancer	8344	533	123	24	3862	5.56e-07
chrI:433472-433972	unassigned_promoter	promoter	828	800	177	chrI:435367-435867	putative_enhancer	enhancer	831	310	79	33	1895	1.28e-08
chrI:433472-433972	unassigned_promoter	promoter	828	800	177	chrI:441995-442495	putative_enhancer	enhancer	842	197	51	14	8523	0.000262599
chrI:4474982-4475482	coding_promoter	promoter	8616	435	84	chrI:4490353-4490853	putative_enhancer	enhancer	8645	1850	424	18	15371	6.01e-06
chrI:4484909-4485285	unassigned_promoter	promoter	8635	355	84	chrI:4490353-4490853	putative_enhancer	enhancer	8645	1850	424	19	5506	0.00129052
chrI:4651644-4652144	coding_promoter	promoter	8955	947	176	chrI:4672558-4673053	putative_enhancer	enhancer	8995	633	135	10	20911	0.0357053
chrI:4654044-4654461	coding_promoter	promoter	8960	855	224	chrI:4701715-4702215	putative_enhancer	enhancer	9051	598	115	9	47713	0.00271773
chrI:4673743-4674243	unassigned_promoter	promoter	8997	923	262	chrI:5315933-5316393	putative_enhancer	enhancer	10233	1519	475	6	642170	0.00105975
chrI:4699223-4699723	unassigned_promoter	promoter	9047	3052	669	chrI:4701715-4702215	putative_enhancer	enhancer	9051	598	115	68	2492	8.29e-11
chrI:4699223-4699723	unassigned_promoter	promoter	9047	3052	669	chrI:5313070-5313450	putative_enhancer	enhancer	10227	2288	721	8	613787	0.00128291
chrI:4720950-4721450	coding_promoter	promoter	9086	983	168	chrI:4847568-4847962	putative_enhancer	enhancer	9331	264	57	6	126565	0.00344242
chrI:4720950-4721450	coding_promoter	promoter	9086	983	168	chrI:5130638-5131053	putative_enhancer	enhancer	9877	552	141	6	409645	0.000371979
chrI:4914175-4914654	coding_promoter	promoter	9460	1076	258	chrI:4917252-4917639	putative_enhancer	enhancer	9467	334	57	30	3031	8.29e-11
chrI:4914175-4914654	coding_promoter	promoter	9460	1076	258	chrI:4974613-4975046	putative_enhancer	enhancer	9578	503	145	9	60415	0.000156986
chrI:4914175-4914654	coding_promoter	promoter	9460	1076	258	chrI:5856474-5856964	putative_enhancer	enhancer	11269	329	91	6	942305	2.65e-06
chrI:4932796-4933242	coding_promoter	promoter	9497	1084	327	chrI:4936061-4936561	putative_enhancer	enhancer	9504	806	188	27	3292	0.00911481
chrI:5008513-5008939	coding_promoter	promoter	9644	264	50	chrI:5009831-5010331	putative_enhancer	enhancer	9646	342	88	18	1355	0.00905411
chrI:5008513-5008939	coding_promoter	promoter	9644	264	50	chrI:5025414-5025799	putative_enhancer	enhancer	9677	613	113	10	16880	9.97e-05
chrI:5025029-5025414	coding_promoter	promoter	9676	308	66	chrI:5030937-5031437	putative_enhancer	enhancer	9688	468	110	10	5966	0.0266095
chrI:5027898-5028218	coding_promoter	promoter	9682	223	49	chrI:5030937-5031437	putative_enhancer	enhancer	9688	468	110	15	3129	3.48e-05
chrI:5027898-5028218	coding_promoter	promoter	9682	223	49	chrI:5037271-5037676	putative_enhancer	enhancer	9699	436	121	9	9415	0.00358268
chrI:5084575-5085075	coding_promoter	promoter	9789	398	94	chrI:5086246-5086746	putative_enhancer	enhancer	9792	479	77	24	1671	0.0016041
chrI:516604-517041	coding_promoter	promoter	984	765	153	chrI:527852-528340	putative_enhancer	enhancer	1007	425	110	10	11274	0.022051
chrI:516604-517041	coding_promoter	promoter	984	765	153	chrI:549150-549650	putative_enhancer	enhancer	1049	350	79	8	32578	0.00441932
chrI:518444-518871	coding_promoter	promoter	988	1117	259	chrI:999035-999535	putative_enhancer	enhancer	1921	1300	255	6	480628	0.0225622
chrI:524494-524902	unassigned_promoter	promoter	1000	506	127	chrI:527852-528340	putative_enhancer	enhancer	1007	425	110	19	3398	1.51e-06
chrI:524494-524902	unassigned_promoter	promoter	1000	506	127	chrI:537114-537603	putative_enhancer	enhancer	1027	245	61	10	12660	0.000809686
chrI:5272441-5272941	coding_promoter	promoter	10151	659	107	chrI:5294374-5294874	putative_enhancer	enhancer	10193	697	157	11	21933	0.00153864
chrI:5307421-5307820	coding_promoter	promoter	10217	406	94	chrI:5311564-5312064	putative_enhancer	enhancer	10224	1654	321	17	4194	0.0185066
chrI:5308066-5308486	coding_promoter	promoter	10218	901	182	chrI:5309563-5310063	putative_enhancer	enhancer	10221	398	80	29	1537	3.35e-07
chrI:5308066-5308486	coding_promoter	promoter	10218	901	182	chrI:5311564-5312064	putative_enhancer	enhancer	10224	1654	321	53	3538	8.29e-11
chrI:5308066-5308486	coding_promoter	promoter	10218	901	182	chrI:5312690-5313070	putative_enhancer	enhancer	10226	1669	519	40	4604	8.29e-11
chrI:5308066-5308486	coding_promoter	promoter	10218	901	182	chrI:5313070-5313450	putative_enhancer	enhancer	10227	2288	721	34	4984	2.49e-10
chrI:5308066-5308486	coding_promoter	promoter	10218	901	182	chrI:5314513-5315013	putative_enhancer	enhancer	10230	926	223	17	6487	0.000212335
chrI:5316393-5316854	coding_promoter	promoter	10234	2373	600	chrI:5420288-5420788	putative_enhancer	enhancer	10429	735	161	8	103915	0.0313991
chrI:5345113-5345530	coding_promoter	promoter	10288	1261	246	chrI:5388333-5388833	putative_enhancer	enhancer	10369	371	103	8	43262	0.0246898
chrI:5357956-5358456	coding_promoter	promoter	10313	550	137	chrI:5408305-5408805	putative_enhancer	enhancer	10407	435	105	8	50349	0.000323086
chrI:5383986-5384446	unassigned_promoter	promoter	10361	327	98	chrI:5385597-5386097	putative_enhancer	enhancer	10364	284	36	17	1631	0.00557273
chrI:5388885-5389385	coding_promoter	promoter	10370	448	126	chrI:5410052-5410552	putative_enhancer	enhancer	10410	225	77	10	21167	3.86e-06
chrI:5416131-5416631	coding_promoter	promoter	10421	627	134	chrI:5420288-5420788	putative_enhancer	enhancer	10429	735	161	24	4157	1.11e-05
chrI:5429698-5430184	coding_promoter	promoter	10447	868	188	chrI:5431241-5431674	putative_enhancer	enhancer	10450	309	76	30	1516	2.38e-05
chrI:545511-546011	coding_promoter	promoter	1043	670	160	chrI:547918-548327	putative_enhancer	enhancer	1047	405	77	24	2361	0.000430978
chrI:5589396-5589896	coding_promoter	promoter	10757	627	163	chrI:5599350-5599850	putative_enhancer	enhancer	10775	440	113	16	9954	0.000133484
chrI:5746362-5746862	coding_promoter	promoter	11056	596	112	chrI:5747420-5747879	putative_enhancer	enhancer	11058	241	67	38	1037	8.29e-11
chrI:5768639-5769139	coding_promoter	promoter	11100	893	168	chrI:5769865-5770365	putative_enhancer	enhancer	11102	326	52	35	1226	3.85e-05
chrI:5768639-5769139	coding_promoter	promoter	11100	893	168	chrI:5865819-5866258	putative_enhancer	enhancer	11288	1202	263	8	97149	0.0256258
chrI:5768639-5769139	coding_promoter	promoter	11100	893	168	chrI:5883748-5884248	putative_enhancer	enhancer	11323	489	119	8	115109	6.64e-05
chrI:5775716-5776216	coding_promoter	promoter	11113	338	71	chrI:5777186-5777686	putative_enhancer	enhancer	11116	317	71	30	1470	1.66e-10
chrI:5809922-5810422	coding_promoter	promoter	11179	473	117	chrI:5811246-5811746	putative_enhancer	enhancer	11181	253	53	23	1324	0.000329097
chrI:5809922-5810422	coding_promoter	promoter	11179	473	117	chrI:5905340-5905785	putative_enhancer	enhancer	11364	332	89	6	95390	0.00211637
chrI:5870504-5871004	coding_promoter	promoter	11298	1437	321	chrI:5879369-5879869	putative_enhancer	enhancer	11315	440	120	19	8865	2.63e-05
chrI:5882003-5882503	coding_promoter	promoter	11320	455	148	chrI:5883748-5884248	putative_enhancer	enhancer	11323	489	119	23	1745	0.000792123
chrI:6060898-6061398	coding_promoter	promoter	11669	794	190	chrI:6073413-6073913	putative_enhancer	enhancer	11693	834	163	16	12515	3.73e-05
chrI:6081246-6081720	coding_promoter	promoter	11708	462	112	chrI:6091963-6092438	putative_enhancer	enhancer	11728	554	142	14	10717	1e-07
chrI:6081246-6081720	coding_promoter	promoter	11708	462	112	chrI:6210717-6211217	putative_enhancer	enhancer	11954	1175	227	7	129484	0.000353388
chrI:608729-609229	coding_promoter	promoter	1165	222	44	chrI:611527-612027	putative_enhancer	enhancer	1170	217	74	28	2798	8.29e-11
chrI:6117980-6118480	coding_promoter	promoter	11777	1632	398	chrI:6120515-6120833	putative_enhancer	enhancer	11782	381	89	25	2444	0.00162025
chrI:6153492-6153992	coding_promoter	promoter	11845	1002	190	chrI:6210717-6211217	putative_enhancer	enhancer	11954	1175	227	13	57225	1.51e-06
chrI:6200164-6200552	unassigned_promoter	promoter	11934	259	73	chrI:6203657-6204157	putative_enhancer	enhancer	11941	292	91	16	3549	4.52e-07
chrI:6364695-6365162	coding_promoter	promoter	12247	608	102	chrI:6389541-6390041	putative_enhancer	enhancer	12295	454	117	8	24863	0.0468846
chrI:636588-637088	coding_promoter	promoter	1219	347	78	chrI:638243-638649	putative_enhancer	enhancer	1222	228	49	25	1608	1.7e-07
chrI:6378927-6379427	coding_promoter	promoter	12275	1364	277	chrI:6389541-6390041	putative_enhancer	enhancer	12295	454	117	24	10614	8.29e-11
chrI:6412556-6412975	non-coding_RNA	promoter	12340	553	121	chrI:6418616-6419116	putative_enhancer	enhancer	12351	432	72	19	6101	7.46e-10
chrI:6416726-6417226	coding_promoter	promoter	12348	426	129	chrI:6418616-6419116	putative_enhancer	enhancer	12351	432	72	31	1890	8.29e-11
chrI:6496418-6496918	coding_promoter	promoter	12500	358	86	chrI:6498103-6498603	putative_enhancer	enhancer	12502	460	112	17	1685	0.0282362
chrI:6497158-6497658	coding_promoter	promoter	12501	623	155	chrI:6499119-6499518	putative_enhancer	enhancer	12504	440	102	32	1910	8.29e-11
chrI:6497158-6497658	coding_promoter	promoter	12501	623	155	chrI:6499518-6499941	putative_enhancer	enhancer	12505	488	119	28	2321	8.29e-11
chrI:6569282-6569782	unassigned_promoter	promoter	12640	773	194	chrI:6572547-6573047	putative_enhancer	enhancer	12646	660	201	31	3265	1.33e-09
chrI:6577051-6577551	coding_promoter	promoter	12655	602	178	chrI:6578204-6578704	putative_enhancer	enhancer	12657	643	178	31	1153	0.00151652
chrI:6577051-6577551	coding_promoter	promoter	12655	602	178	chrI:6581173-6581662	putative_enhancer	enhancer	12662	383	90	17	4116	2.75e-05
chrI:6579699-6580199	coding_promoter	promoter	12660	1126	303	chrI:6581173-6581662	putative_enhancer	enhancer	12662	383	90	26	1468	0.0384732
chrI:6745296-6745796	coding_promoter	promoter	12981	1387	316	chrI:6769944-6770444	putative_enhancer	enhancer	13028	251	79	10	24648	0.00640285
chrI:6781503-6782003	non-coding_RNA	promoter	13050	1153	283	chrI:6838046-6838546	putative_enhancer	enhancer	13159	1024	308	9	56543	0.0443954
chrI:6835227-6835671	coding_promoter	promoter	13153	1106	300	chrI:6836336-6836779	putative_enhancer	enhancer	13155	306	76	35	1108	3.75e-08
chrI:6835227-6835671	coding_promoter	promoter	13153	1106	300	chrI:6836779-6837183	putative_enhancer	enhancer	13156	428	116	23	1532	0.00338832
chrI:6835227-6835671	coding_promoter	promoter	13153	1106	300	chrI:6837183-6837568	putative_enhancer	enhancer	13157	565	180	43	1926	8.29e-11
chrI:6835227-6835671	coding_promoter	promoter	13153	1106	300	chrI:6837568-6837991	putative_enhancer	enhancer	13158	816	297	55	2330	8.29e-11
chrI:6835227-6835671	coding_promoter	promoter	13153	1106	300	chrI:6838046-6838546	putative_enhancer	enhancer	13159	1024	308	64	2847	8.29e-11
chrI:6881930-6882371	coding_promoter	promoter	13242	778	188	chrI:6883292-6883781	putative_enhancer	enhancer	13244	367	86	32	1386	8.36e-05
chrI:6881930-6882371	coding_promoter	promoter	13242	778	188	chrI:6893043-6893509	putative_enhancer	enhancer	13262	280	70	12	11126	0.000348161
chrI:6885058-6885557	unassigned_promoter	promoter	13247	611	153	chrI:6886466-6886920	putative_enhancer	enhancer	13250	251	81	19	1386	0.020314
chrI:6945532-6946032	unassigned_promoter	promoter	13361	824	203	chrI:6951016-6951512	putative_enhancer	enhancer	13370	681	143	27	5482	3.59e-08
chrI:69869-70369	coding_promoter	promoter	133	1395	449	chrI:74531-75031	putative_enhancer	enhancer	141	228	85	33	4662	8.29e-11
chrI:69869-70369	coding_promoter	promoter	133	1395	449	chrI:96348-96848	putative_enhancer	enhancer	183	153	33	9	26479	0.0454273
chrI:69869-70369	coding_promoter	promoter	133	1395	449	chrI:849136-849636	putative_enhancer	enhancer	1630	356	112	6	779267	0.000169119
chrI:7005351-7005851	coding_promoter	promoter	13474	610	161	chrI:7055906-7056308	putative_enhancer	enhancer	13566	322	88	7	50506	0.00391818
chrI:7056804-7057304	coding_promoter	promoter	13568	710	171	chrI:7058597-7059097	putative_enhancer	enhancer	13571	497	148	34	1793	6.13e-09
chrI:7081296-7081796	coding_promoter	promoter	13616	596	185	chrI:7083403-7083903	putative_enhancer	enhancer	13619	743	238	20	2107	0.00626643
chrI:7082079-7082579	coding_promoter	promoter	13617	1188	349	chrI:7083403-7083903	putative_enhancer	enhancer	13619	743	238	43	1324	1.55e-06
chrI:7084325-7084825	coding_promoter	promoter	13620	790	221	chrI:7085688-7086188	putative_enhancer	enhancer	13622	604	214	28	1363	0.00170552
chrI:7156694-7157194	coding_promoter	promoter	13754	1128	231	chrI:7217183-7217683	putative_enhancer	enhancer	13866	722	217	11	60489	8.97e-06
chrI:716575-717028	coding_promoter	promoter	1377	686	162	chrI:851958-852327	putative_enhancer	enhancer	1635	545	135	7	135341	0.000838597
chrI:7214650-7215129	coding_promoter	promoter	13861	605	188	chrI:7217183-7217683	putative_enhancer	enhancer	13866	722	217	39	2544	8.29e-11
chrI:7354086-7354586	coding_promoter	promoter	14129	327	58	chrI:7355665-7356165	putative_enhancer	enhancer	14132	326	61	26	1579	3.31e-10
chrI:7380855-7381355	unassigned_promoter	promoter	14181	347	103	chrI:7385115-7385615	putative_enhancer	enhancer	14188	335	82	19	4260	6.91e-07
chrI:7421213-7421713	unassigned_promoter	promoter	14258	468	202	chrI:7518056-7518497	putative_enhancer	enhancer	14443	684	255	10	96813	4.33e-08
chrI:7474981-7475475	coding_promoter	promoter	14363	2284	786	chrI:7658621-7659107	putative_enhancer	enhancer	14710	803	206	9	183636	1.89e-05
chrI:7490034-7490534	coding_promoter	promoter	14391	767	211	chrI:7492867-7493277	putative_enhancer	enhancer	14396	326	101	15	2788	0.0152125
chrI:7491835-7492335	coding_promoter	promoter	14394	1339	386	chrI:7494041-7494518	putative_enhancer	enhancer	14398	618	168	45	2194	8.29e-11
chrI:7500280-7500780	coding_promoter	promoter	14410	2883	876	chrI:7518056-7518497	putative_enhancer	enhancer	14443	684	255	28	17746	8.29e-11
chrI:7500280-7500780	coding_promoter	promoter	14410	2883	876	chrI:7543340-7543840	putative_enhancer	enhancer	14491	854	229	14	43060	0.00104436
chrI:7500280-7500780	coding_promoter	promoter	14410	2883	876	chrI:7563764-7564264	putative_enhancer	enhancer	14528	406	112	10	63484	0.000491782
chrI:7500280-7500780	coding_promoter	promoter	14410	2883	876	chrI:7658621-7659107	putative_enhancer	enhancer	14710	803	206	8	158334	0.00927068
chrI:7515740-7516240	coding_promoter	promoter	14439	369	127	chrI:7518056-7518497	putative_enhancer	enhancer	14443	684	255	22	2286	9.07e-05
chrI:7518497-7518939	coding_promoter	promoter	14444	1423	490	chrI:7543340-7543840	putative_enhancer	enhancer	14491	854	229	17	24872	1.47e-07
chrI:7518497-7518939	coding_promoter	promoter	14444	1423	490	chrI:8018907-8019407	putative_enhancer	enhancer	15397	816	192	7	500439	6.73e-05
chrI:7542077-7542577	coding_promoter	promoter	14489	818	200	chrI:7543340-7543840	putative_enhancer	enhancer	14491	854	229	51	1263	6.63e-10
chrI:7563014-7563514	coding_promoter	promoter	14527	1642	408	chrI:7575248-7575748	putative_enhancer	enhancer	14549	638	171	18	12234	9.95e-06
chrI:756784-757284	coding_promoter	promoter	1455	605	124	chrI:826161-826661	putative_enhancer	enhancer	1588	277	75	7	69377	0.00296932
chrI:756784-757284	coding_promoter	promoter	1455	605	124	chrI:999035-999535	putative_enhancer	enhancer	1921	1300	255	11	242251	4.97e-10
chrI:7571017-7571508	coding_promoter	promoter	14542	618	153	chrI:7575248-7575748	putative_enhancer	enhancer	14549	638	171	26	4236	8.29e-11
chrI:7573749-7574249	coding_promoter	promoter	14547	878	189	chrI:7575248-7575748	putative_enhancer	enhancer	14549	638	171	54	1499	8.29e-11
chrI:7595363-7595863	coding_promoter	promoter	14587	1695	430	chrI:7661257-7661659	putative_enhancer	enhancer	14715	528	176	10	65845	4.2e-06
chrI:7608191-7608691	coding_promoter	promoter	14610	425	113	chrI:7609395-7609895	putative_enhancer	enhancer	14612	334	102	25	1204	0.000396711
chrI:763278-763778	coding_promoter	promoter	1468	608	94	chrI:826161-826661	putative_enhancer	enhancer	1588	277	75	8	62883	0.000131768
chrI:7658183-7658621	coding_promoter	promoter	14709	752	205	chrI:7660856-7661257	putative_enhancer	enhancer	14714	614	198	19	2654	0.00145991
chrI:7658183-7658621	coding_promoter	promoter	14709	752	205	chrI:7661257-7661659	putative_enhancer	enhancer	14715	528	176	18	3056	8.49e-05
chrI:7659107-7659600	coding_promoter	promoter	14711	773	217	chrI:7660856-7661257	putative_enhancer	enhancer	14714	614	198	27	1703	2.17e-07
chrI:7659107-7659600	coding_promoter	promoter	14711	773	217	chrI:7661257-7661659	putative_enhancer	enhancer	14715	528	176	18	2105	0.00347252
chrI:7861385-7861885	coding_promoter	promoter	15097	1391	413	chrI:7866940-7867418	putative_enhancer	enhancer	15107	595	169	23	5544	1.52e-05
chrI:7861385-7861885	coding_promoter	promoter	15097	1391	413	chrI:7871549-7872010	putative_enhancer	enhancer	15115	357	119	14	10144	0.00293971
chrI:7865992-7866477	coding_promoter	promoter	15105	1223	339	chrI:7867645-7868145	putative_enhancer	enhancer	15108	548	229	40	1661	2.34e-07
chrI:7935961-7936345	coding_promoter	promoter	15239	637	122	chrI:8011290-8011790	putative_enhancer	enhancer	15383	825	155	8	75387	0.00227488
chrI:7942511-7943011	coding_promoter	promoter	15251	496	103	chrI:7948089-7948589	putative_enhancer	enhancer	15261	347	103	16	5578	3.68e-05
chrI:7968730-7969198	coding_promoter	promoter	15301	904	185	chrI:8011290-8011790	putative_enhancer	enhancer	15383	825	155	10	42576	0.00294834
chrI:7968730-7969198	coding_promoter	promoter	15301	904	185	chrI:8101595-8102095	putative_enhancer	enhancer	15558	973	161	8	132881	0.00147231
chrI:8009607-8010107	coding_promoter	promoter	15380	451	99	chrI:8018907-8019407	putative_enhancer	enhancer	15397	816	192	18	9300	3.89e-07
chrI:8009607-8010107	coding_promoter	promoter	15380	451	99	chrI:8045882-8046382	putative_enhancer	enhancer	15450	512	105	8	36275	0.00644822
chrI:8010245-8010745	coding_promoter	promoter	15381	567	133	chrI:8011290-8011790	putative_enhancer	enhancer	15383	825	155	40	1045	9.09e-06
chrI:8010245-8010745	coding_promoter	promoter	15381	567	133	chrI:8018907-8019407	putative_enhancer	enhancer	15397	816	192	20	8662	4.22e-09
chrI:8083223-8083721	coding_promoter	promoter	15522	354	44	chrI:8123608-8124108	putative_enhancer	enhancer	15599	310	64	6	40386	0.0146281
chrI:8100019-8100519	coding_promoter	promoter	15555	963	183	chrI:8101595-8102095	putative_enhancer	enhancer	15558	973	161	79	1576	8.29e-11
chrI:8100019-8100519	coding_promoter	promoter	15555	963	183	chrI:8102885-8103385	putative_enhancer	enhancer	15560	489	113	29	2866	7.33e-07
chrI:8100019-8100519	coding_promoter	promoter	15555	963	183	chrI:8123608-8124108	putative_enhancer	enhancer	15599	310	64	11	23589	1.13e-05
chrI:8329545-8329946	coding_promoter	promoter	15997	533	106	chrI:8411717-8412174	putative_enhancer	enhancer	16154	319	95	7	82200	0.000292022
chrI:8344372-8344872	unassigned_promoter	promoter	16025	448	92	chrI:8346630-8347130	putative_enhancer	enhancer	16029	161	41	17	2258	0.000117967
chrI:835952-836452	coding_promoter	promoter	1605	321	60	chrI:999035-999535	putative_enhancer	enhancer	1921	1300	255	6	163083	0.0386707
chrI:882578-883078	coding_promoter	promoter	1696	1904	513	chrI:884293-884672	putative_enhancer	enhancer	1699	244	50	49	1654	8.29e-11
chrI:882578-883078	coding_promoter	promoter	1696	1904	513	chrI:999035-999535	putative_enhancer	enhancer	1921	1300	255	14	116457	8.92e-08
chrI:8865412-8865912	coding_promoter	promoter	17026	1065	278	chrI:8867422-8867922	putative_enhancer	enhancer	17029	523	119	30	2010	0.00379958
chrI:8905324-8905824	coding_promoter	promoter	17101	662	133	chrI:8983787-8984287	putative_enhancer	enhancer	17254	305	93	6	78463	0.02938
chrI:9042650-9043150	coding_promoter	promoter	17366	795	159	chrI:9076103-9076603	putative_enhancer	enhancer	17430	1048	296	12	33453	0.000776992
chrI:9057769-9058269	coding_promoter	promoter	17395	1164	224	chrI:9076103-9076603	putative_enhancer	enhancer	17430	1048	296	18	18334	3.22e-06
chrI:9057769-9058269	coding_promoter	promoter	17395	1164	224	chrI:9244451-9244951	putative_enhancer	enhancer	17747	496	116	6	186682	0.0464407
chrI:9064565-9065065	coding_promoter	promoter	17408	462	99	chrI:9076103-9076603	putative_enhancer	enhancer	17430	1048	296	13	11538	0.0109025
chrI:9077207-9077707	coding_promoter	promoter	17432	1059	284	chrI:9131769-9132232	putative_enhancer	enhancer	17535	935	174	10	54543	0.00157096
chrI:9082995-9083495	unassigned_promoter	promoter	17443	561	118	chrI:9130497-9130920	putative_enhancer	enhancer	17532	303	96	7	47463	0.0012222
chrI:9097510-9098010	unassigned_promoter	promoter	17470	1004	304	chrI:9131769-9132232	putative_enhancer	enhancer	17535	935	174	10	34240	0.0100161
chrI:9097510-9098010	unassigned_promoter	promoter	17470	1004	304	chrI:9168465-9168965	putative_enhancer	enhancer	17604	1098	273	11	70955	2.16e-05
chrI:9110696-9111196	coding_promoter	promoter	17495	869	238	chrI:9131769-9132232	putative_enhancer	enhancer	17535	935	174	12	21054	0.00247974
chrI:9112953-9113453	coding_promoter	promoter	17499	1384	393	chrI:9115488-9115980	putative_enhancer	enhancer	17503	581	142	32	2531	2.14e-06
chrI:9128687-9129187	coding_promoter	promoter	17529	1091	253	chrI:9131769-9132232	putative_enhancer	enhancer	17535	935	174	50	3063	8.29e-11
chrI:9128687-9129187	coding_promoter	promoter	17529	1091	253	chrI:9168465-9168965	putative_enhancer	enhancer	17604	1098	273	14	39778	6.41e-06
chrI:9167214-9167623	coding_promoter	promoter	17602	753	198	chrI:9168465-9168965	putative_enhancer	enhancer	17604	1098	273	45	1297	0.00046116
chrI:9275144-9275644	unassigned_promoter	promoter	17807	701	163	chrI:9276254-9276606	putative_enhancer	enhancer	17809	242	79	23	1036	0.00876366
chrI:9315352-9315852	coding_promoter	promoter	17882	658	168	chrI:9330674-9331174	putative_enhancer	enhancer	17912	437	124	9	15322	0.00837121
chrI:9315352-9315852	coding_promoter	promoter	17882	658	168	chrI:9333863-9334363	putative_enhancer	enhancer	17917	298	89	7	18511	0.0350594
chrI:9331220-9331625	unassigned_promoter	promoter	17913	454	108	chrI:9385826-9386326	putative_enhancer	enhancer	18015	757	201	9	54654	1.85e-06
chrI:9332472-9332972	non-coding_RNA	promoter	17915	684	213	chrI:9334377-9334877	putative_enhancer	enhancer	17918	287	104	18	1905	0.00221688
chrI:9332472-9332972	non-coding_RNA	promoter	17915	684	213	chrI:9382657-9383066	putative_enhancer	enhancer	18009	909	308	7	50139	0.0288884
chrI:9343678-9344178	coding_promoter	promoter	17936	2504	667	chrI:9382657-9383066	putative_enhancer	enhancer	18009	909	308	15	38933	2.07e-06
chrI:9343678-9344178	coding_promoter	promoter	17936	2504	667	chrI:9383622-9384122	putative_enhancer	enhancer	18011	1159	326	23	39944	8.29e-11
chrI:9343678-9344178	coding_promoter	promoter	17936	2504	667	chrI:9385826-9386326	putative_enhancer	enhancer	18015	757	201	16	42148	2.65e-08
chrI:9343678-9344178	coding_promoter	promoter	17936	2504	667	chrI:9428619-9429119	putative_enhancer	enhancer	18096	419	82	8	84941	0.0026652
chrI:9343678-9344178	coding_promoter	promoter	17936	2504	667	chrI:9430481-9430981	putative_enhancer	enhancer	18099	862	241	10	86803	0.00320932
chrI:934942-935442	coding_promoter	promoter	1799	232	56	chrI:999035-999535	putative_enhancer	enhancer	1921	1300	255	11	64093	1.97e-08
chrI:9372917-9373319	unassigned_promoter	promoter	17991	880	308	chrI:9375128-9375628	putative_enhancer	enhancer	17995	559	157	21	2260	0.0120446
chrI:9372917-9373319	unassigned_promoter	promoter	17991	880	308	chrI:9383622-9384122	putative_enhancer	enhancer	18011	1159	326	16	10754	0.000248826
chrI:9374556-9375056	unassigned_promoter	promoter	17994	592	167	chrI:9383622-9384122	putative_enhancer	enhancer	18011	1159	326	13	9066	0.0262361
chrI:9381236-9381736	unassigned_promoter	promoter	18006	2315	844	chrI:9382657-9383066	putative_enhancer	enhancer	18009	909	308	116	1375	8.29e-11
chrI:9381236-9381736	unassigned_promoter	promoter	18006	2315	844	chrI:9383622-9384122	putative_enhancer	enhancer	18011	1159	326	120	2386	8.29e-11
chrI:9381236-9381736	unassigned_promoter	promoter	18006	2315	844	chrI:9385826-9386326	putative_enhancer	enhancer	18015	757	201	43	4590	8.29e-11
chrI:9381236-9381736	unassigned_promoter	promoter	18006	2315	844	chrI:9428619-9429119	putative_enhancer	enhancer	18096	419	82	8	47383	0.0199717
chrI:9381236-9381736	unassigned_promoter	promoter	18006	2315	844	chrI:9430481-9430981	putative_enhancer	enhancer	18099	862	241	11	49245	0.00263495
chrI:9447899-9448399	unassigned_promoter	promoter	18130	630	144	chrI:9449184-9449684	putative_enhancer	enhancer	18132	532	114	38	1285	8.29e-11
chrI:9605502-9606002	coding_promoter	promoter	18428	789	197	chrI:9748540-9749040	putative_enhancer	enhancer	18700	312	89	6	143038	0.0042547
chrI:9701692-9702192	unassigned_promoter	promoter	18613	344	75	chrI:9739367-9739867	putative_enhancer	enhancer	18683	494	117	8	37675	0.000365801
chrI:9721910-9722289	coding_promoter	promoter	18651	1087	360	chrI:9725172-9725672	putative_enhancer	enhancer	18658	905	231	38	3323	8.29e-11
chrI:9722289-9722668	coding_promoter	promoter	18652	1754	446	chrI:9725172-9725672	putative_enhancer	enhancer	18658	905	231	67	2944	8.29e-11
chrI:9722289-9722668	coding_promoter	promoter	18652	1754	446	chrI:9727641-9728062	putative_enhancer	enhancer	18662	275	46	16	5373	0.00224205
chrI:9722289-9722668	coding_promoter	promoter	18652	1754	446	chrI:9731762-9732262	putative_enhancer	enhancer	18669	353	106	15	9534	0.00777139
chrI:9722289-9722668	coding_promoter	promoter	18652	1754	446	chrI:9732444-9732944	putative_enhancer	enhancer	18670	337	94	14	10216	0.00465391
chrI:9722289-9722668	coding_promoter	promoter	18652	1754	446	chrI:9738321-9738821	putative_enhancer	enhancer	18681	527	82	19	16093	4.97e-10
chrI:9722289-9722668	coding_promoter	promoter	18652	1754	446	chrI:9739367-9739867	putative_enhancer	enhancer	18683	494	117	14	17139	0.000563633
chrI:9722289-9722668	coding_promoter	promoter	18652	1754	446	chrI:9752984-9753484	putative_enhancer	enhancer	18708	389	106	13	30756	1.29e-06
chrI:972968-973468	coding_promoter	promoter	1874	980	195	chrI:999035-999535	putative_enhancer	enhancer	1921	1300	255	33	26067	8.29e-11
chrI:9731208-9731708	coding_promoter	promoter	18668	1122	283	chrI:9733995-9734495	putative_enhancer	enhancer	18673	492	106	20	2787	0.0148089
chrI:9752216-9752716	coding_promoter	promoter	18707	1266	276	chrI:9787888-9788278	putative_enhancer	enhancer	18774	691	188	14	35617	4.04e-07
chrI:978090-978545	coding_promoter	promoter	1884	261	58	chrI:979372-979872	putative_enhancer	enhancer	1886	320	57	17	1305	0.00216436
chrI:978090-978545	coding_promoter	promoter	1884	261	58	chrI:999035-999535	putative_enhancer	enhancer	1921	1300	255	15	20968	4.97e-10
chrI:978545-979000	coding_promoter	promoter	1885	289	85	chrI:982905-983405	putative_enhancer	enhancer	1893	317	69	15	4383	2.46e-05
chrI:978545-979000	coding_promoter	promoter	1885	289	85	chrI:999035-999535	putative_enhancer	enhancer	1921	1300	255	12	20513	0.000149247
chrI:9788413-9788879	coding_promoter	promoter	18775	979	261	chrI:9941132-9941539	putative_enhancer	enhancer	19061	296	74	6	152689	0.000937903
chrI:9788413-9788879	coding_promoter	promoter	18775	979	261	chrI:9984876-9985376	putative_enhancer	enhancer	19144	1823	305	8	196480	0.00469112
chrI:9846199-9846699	coding_promoter	promoter	18881	683	168	chrI:9858129-9858629	putative_enhancer	enhancer	18906	360	85	11	11930	0.00196367
chrI:9853708-9854065	coding_promoter	promoter	18897	1261	288	chrI:9858635-9859135	putative_enhancer	enhancer	18907	746	147	19	4999	0.000767764
chrI:9854065-9854429	coding_promoter	promoter	18898	1399	396	chrI:9858635-9859135	putative_enhancer	enhancer	18907	746	147	19	4638	0.00407424
chrI:9854065-9854429	coding_promoter	promoter	18898	1399	396	chrI:9984876-9985376	putative_enhancer	enhancer	19144	1823	305	10	130879	7.59e-05
chrI:9855236-9855736	coding_promoter	promoter	18900	894	227	chrI:9858635-9859135	putative_enhancer	enhancer	18907	746	147	31	3399	8.29e-11
chrI:9855236-9855736	coding_promoter	promoter	18900	894	227	chrI:9870050-9870550	putative_enhancer	enhancer	18928	380	109	15	14814	8.29e-11
chrI:9882056-9882556	coding_promoter	promoter	18950	909	155	chrI:9984876-9985376	putative_enhancer	enhancer	19144	1823	305	9	102820	0.00113614
chrI:988830-989330	coding_promoter	promoter	1901	813	154	chrI:999035-999535	putative_enhancer	enhancer	1921	1300	255	68	10205	8.29e-11
chrI:9900436-9900902	coding_promoter	promoter	18985	735	156	chrI:9984876-9985376	putative_enhancer	enhancer	19144	1823	305	17	84457	8.29e-11
chrI:9938243-9938719	coding_promoter	promoter	19055	940	154	chrI:9984876-9985376	putative_enhancer	enhancer	19144	1823	305	20	46645	8.29e-11
chrI:9962654-9963154	coding_promoter	promoter	19102	600	147	chrI:9984876-9985376	putative_enhancer	enhancer	19144	1823	305	15	22222	2.22e-05
chrI:9963601-9964007	coding_promoter	promoter	19104	603	104	chrI:9984876-9985376	putative_enhancer	enhancer	19144	1823	305	24	21322	8.29e-11
chrI:9979634-9980134	coding_promoter	promoter	19135	580	107	chrI:9984876-9985376	putative_enhancer	enhancer	19144	1823	305	48	5242	8.29e-11
chrII:10000986-10001486	coding_promoter	promoter	19165	763	101	chrII:9791086-9791586	putative_enhancer	enhancer	18759	670	101	9	209900	1.23e-08
chrII:10094082-10094582	coding_promoter	promoter	19338	384	82	chrII:10095112-10095611	putative_enhancer	enhancer	19340	278	72	22	1029	0.00197974
chrII:10169368-10169802	coding_promoter	promoter	19482	1154	208	chrII:10220646-10221064	putative_enhancer	enhancer	19579	514	104	9	51270	0.00788856
chrII:10377774-10378274	unassigned_promoter	promoter	19884	555	117	chrII:10383449-10383949	putative_enhancer	enhancer	19894	483	92	13	5675	0.00990336
chrII:10377774-10378274	unassigned_promoter	promoter	19884	555	117	chrII:10384567-10385001	putative_enhancer	enhancer	19896	1256	240	23	6760	3.44e-08
chrII:10377774-10378274	unassigned_promoter	promoter	19884	555	117	chrII:10390276-10390776	putative_enhancer	enhancer	19907	1091	186	14	12502	0.000226407
chrII:10382157-10382633	coding_promoter	promoter	19892	1896	388	chrII:9738769-9739261	putative_enhancer	enhancer	18659	619	120	6	643380	0.000735631
chrII:10382157-10382633	coding_promoter	promoter	19892	1896	388	chrII:10383449-10383949	putative_enhancer	enhancer	19894	483	92	60	1304	8.23e-11
chrII:10382157-10382633	coding_promoter	promoter	19892	1896	388	chrII:10384567-10385001	putative_enhancer	enhancer	19896	1256	240	132	2389	8.23e-11
chrII:10382157-10382633	coding_promoter	promoter	19892	1896	388	chrII:10389634-10390134	putative_enhancer	enhancer	19906	959	190	33	7489	8.23e-11
chrII:10382157-10382633	coding_promoter	promoter	19892	1896	388	chrII:10390276-10390776	putative_enhancer	enhancer	19907	1091	186	48	8131	8.23e-11
chrII:10382157-10382633	coding_promoter	promoter	19892	1896	388	chrII:10402881-10403381	putative_enhancer	enhancer	19932	319	54	10	20736	0.0126597
chrII:10382157-10382633	coding_promoter	promoter	19892	1896	388	chrII:10447279-10447618	putative_enhancer	enhancer	20020	724	122	10	65053	0.000472677
chrII:10388307-10388638	unassigned_promoter	promoter	19903	374	78	chrII:10390276-10390776	putative_enhancer	enhancer	19907	1091	186	22	2054	0.00030782
chrII:10389014-10389450	unassigned_promoter	promoter	19905	1072	231	chrII:10390276-10390776	putative_enhancer	enhancer	19907	1091	186	74	1294	8.23e-11
chrII:10502515-10503015	coding_promoter	promoter	20127	1882	454	chrII:10504557-10504986	putative_enhancer	enhancer	20130	799	201	55	2006	8.23e-11
chrII:10502515-10503015	coding_promoter	promoter	20127	1882	454	chrII:10529269-10529769	putative_enhancer	enhancer	20175	794	207	13	26754	0.000670227
chrII:10502515-10503015	coding_promoter	promoter	20127	1882	454	chrII:10551933-10552342	putative_enhancer	enhancer	20219	1524	473	12	49372	0.00113552
chrII:10516259-10516759	coding_promoter	promoter	20151	591	109	chrII:10529269-10529769	putative_enhancer	enhancer	20175	794	207	12	13010	0.00260489
chrII:10525004-10525504	coding_promoter	promoter	20167	488	102	chrII:10529269-10529769	putative_enhancer	enhancer	20175	794	207	20	4265	1.36e-06
chrII:10527529-10528029	coding_promoter	promoter	20172	1464	343	chrII:10529269-10529769	putative_enhancer	enhancer	20175	794	207	76	1740	8.23e-11
chrII:10527529-10528029	coding_promoter	promoter	20172	1464	343	chrII:10549191-10549672	putative_enhancer	enhancer	20213	964	316	11	21652	0.0401664
chrII:10527529-10528029	coding_promoter	promoter	20172	1464	343	chrII:10551933-10552342	putative_enhancer	enhancer	20219	1524	473	25	24358	8.23e-11
chrII:10548710-10549191	coding_promoter	promoter	20212	1596	491	chrII:10550187-10550607	putative_enhancer	enhancer	20215	522	188	45	1447	8.23e-11
chrII:10548710-10549191	coding_promoter	promoter	20212	1596	491	chrII:10551511-10551933	putative_enhancer	enhancer	20218	476	168	24	2772	3.82e-07
chrII:10548710-10549191	coding_promoter	promoter	20212	1596	491	chrII:10551933-10552342	putative_enhancer	enhancer	20219	1524	473	88	3187	8.23e-11
chrII:10548710-10549191	coding_promoter	promoter	20212	1596	491	chrII:10555765-10556167	putative_enhancer	enhancer	20228	586	206	17	7016	1.67e-05
chrII:10548710-10549191	coding_promoter	promoter	20212	1596	491	chrII:10557147-10557647	putative_enhancer	enhancer	20230	876	219	27	8447	8.23e-11
chrII:10549768-10550187	unassigned_promoter	promoter	20214	397	117	chrII:10551933-10552342	putative_enhancer	enhancer	20219	1524	473	30	2160	8.23e-11
chrII:10555368-10555765	unassigned_promoter	promoter	20227	1198	386	chrII:10557147-10557647	putative_enhancer	enhancer	20230	876	219	42	1831	8.23e-11
chrII:10555368-10555765	unassigned_promoter	promoter	20227	1198	386	chrII:10558744-10559114	putative_enhancer	enhancer	20233	445	109	19	3363	7.14e-05
chrII:1056800-1057300	pseudogene_promoter	promoter	2033	282	54	chrII:1090762-1091177	putative_enhancer	enhancer	2099	348	62	8	33919	0.000232044
chrII:10594648-10595148	coding_promoter	promoter	20304	378	65	chrII:10596213-10596713	putative_enhancer	enhancer	20307	337	78	28	1565	8.23e-11
chrII:10839928-10840428	non-coding_RNA	promoter	20772	787	183	chrII:10850976-10851476	putative_enhancer	enhancer	20792	1095	287	29	11048	8.23e-11
chrII:1084880-1085380	coding_promoter	promoter	2087	846	223	chrII:1086442-1086909	putative_enhancer	enhancer	2090	285	68	38	1545	2.35e-06
chrII:10924570-10925070	coding_promoter	promoter	20934	871	169	chrII:10926469-10926881	putative_enhancer	enhancer	20938	316	90	26	1855	6.07e-07
chrII:11042782-11043282	coding_promoter	promoter	21152	1961	472	chrII:11182408-11182874	putative_enhancer	enhancer	21413	182	45	7	139609	0.0010571
chrII:11337613-11338113	coding_promoter	promoter	21710	404	98	chrII:11371760-11372260	putative_enhancer	enhancer	21777	232	58	7	34147	0.00105451
chrII:11337613-11338113	coding_promoter	promoter	21710	404	98	chrII:11414070-11414570	putative_enhancer	enhancer	21856	397	95	6	76457	0.00183905
chrII:1142138-1142584	coding_promoter	promoter	2199	462	109	chrII:1143200-1143700	putative_enhancer	enhancer	2201	392	108	28	1089	0.0234503
chrII:1142138-1142584	coding_promoter	promoter	2199	462	109	chrII:1244430-1244930	putative_enhancer	enhancer	2389	531	156	6	102319	0.00515155
chrII:11464310-11464810	coding_promoter	promoter	21950	1612	343	chrII:11619006-11619506	putative_enhancer	enhancer	22243	1197	338	8	154696	0.0217229
chrII:11464310-11464810	coding_promoter	promoter	21950	1612	343	chrII:12222418-12222918	putative_enhancer	enhancer	23387	1742	463	11	758108	3.37e-09
chrII:11472398-11472898	coding_promoter	promoter	21965	917	141	chrII:11491371-11491829	putative_enhancer	enhancer	22001	184	45	9	18952	0.000116967
chrII:11542255-11542680	coding_promoter	promoter	22097	413	96	chrII:11621430-11621930	putative_enhancer	enhancer	22246	653	195	6	79213	0.018866
chrII:11604478-11604978	coding_promoter	promoter	22216	438	111	chrII:11619006-11619506	putative_enhancer	enhancer	22243	1197	338	13	14528	0.000338792
chrII:11611878-11612378	coding_promoter	promoter	22230	375	91	chrII:11619006-11619506	putative_enhancer	enhancer	22243	1197	338	13	7128	0.0326208
chrII:11617470-11617970	unassigned_promoter	promoter	22241	689	182	chrII:11619006-11619506	putative_enhancer	enhancer	22243	1197	338	34	1536	0.00015805
chrII:11617470-11617970	unassigned_promoter	promoter	22241	689	182	chrII:11644291-11644791	putative_enhancer	enhancer	22289	139	45	6	26821	0.0336235
chrII:11619824-11620324	coding_promoter	promoter	22244	2134	611	chrII:11621430-11621930	putative_enhancer	enhancer	22246	653	195	51	1606	1.37e-06
chrII:11619824-11620324	coding_promoter	promoter	22244	2134	611	chrII:11629874-11630374	putative_enhancer	enhancer	22263	473	137	15	10050	0.0423457
chrII:11632597-11633097	unassigned_promoter	promoter	22268	1538	358	chrII:11636487-11636930	putative_enhancer	enhancer	22274	416	97	18	3861	0.010659
chrII:11737258-11737746	coding_promoter	promoter	22467	866	240	chrII:11743613-11743991	putative_enhancer	enhancer	22479	351	102	15	6300	0.000236074
chrII:11833469-11833969	coding_promoter	promoter	22648	286	56	chrII:11843389-11843857	putative_enhancer	enhancer	22665	357	80	9	9904	0.00175141
chrII:11874565-11875065	coding_promoter	promoter	22727	1012	256	chrII:11880418-11880893	putative_enhancer	enhancer	22738	444	128	21	5840	7.33e-05
chrII:11979640-11980058	coding_promoter	promoter	22919	485	114	chrII:12222418-12222918	putative_enhancer	enhancer	23387	1742	463	8	242819	0.000121021
chrII:12006621-12007060	coding_promoter	promoter	22973	203	54	chrII:12222418-12222918	putative_enhancer	enhancer	23387	1742	463	7	215828	0.000274197
chrII:12027858-12028257	coding_promoter	promoter	23015	215	33	chrII:12052030-12052530	putative_enhancer	enhancer	23062	377	88	7	24223	0.000558259
chrII:12040083-12040583	coding_promoter	promoter	23039	1175	315	chrII:12052030-12052530	putative_enhancer	enhancer	23062	377	88	26	11947	8.23e-11
chrII:12040083-12040583	coding_promoter	promoter	23039	1175	315	chrII:12186676-12187112	putative_enhancer	enhancer	23317	231	52	6	146561	0.00374867
chrII:12040083-12040583	coding_promoter	promoter	23039	1175	315	chrII:12222418-12222918	putative_enhancer	enhancer	23387	1742	463	14	182335	1.23e-09
chrII:12081367-12081867	unassigned_promoter	promoter	23116	332	89	chrII:12222418-12222918	putative_enhancer	enhancer	23387	1742	463	7	141051	0.0140429
chrII:12089500-12090000	coding_promoter	promoter	23131	1112	269	chrII:12162896-12163396	putative_enhancer	enhancer	23272	401	78	8	73396	0.00941105
chrII:12089500-12090000	coding_promoter	promoter	23131	1112	269	chrII:12222418-12222918	putative_enhancer	enhancer	23387	1742	463	10	132918	0.00240844
chrII:12102235-12102735	coding_promoter	promoter	23154	864	231	chrII:12222418-12222918	putative_enhancer	enhancer	23387	1742	463	15	120183	8.23e-11
chrII:12185595-12186095	coding_promoter	promoter	23315	368	88	chrII:12186676-12187112	putative_enhancer	enhancer	23317	231	52	37	1049	8.23e-11
chrII:12185595-12186095	coding_promoter	promoter	23315	368	88	chrII:12222418-12222918	putative_enhancer	enhancer	23387	1742	463	12	36823	0.000111303
chrII:12221232-12221732	pseudogene_promoter	promoter	23385	379	78	chrII:12222418-12222918	putative_enhancer	enhancer	23387	1742	463	75	1186	8.23e-11
chrII:12221232-12221732	pseudogene_promoter	promoter	23385	379	78	chrII:12239326-12239826	putative_enhancer	enhancer	23419	316	70	8	18094	0.0123431
chrII:12237432-12237932	coding_promoter	promoter	23416	492	105	chrII:12239326-12239826	putative_enhancer	enhancer	23419	316	70	30	1894	8.23e-11
chrII:12339022-12339522	coding_promoter	promoter	23614	980	194	chrII:12350717-12351217	putative_enhancer	enhancer	23633	338	71	14	11695	0.000402405
chrII:12339022-12339522	coding_promoter	promoter	23614	980	194	chrII:12378670-12379170	putative_enhancer	enhancer	23684	286	89	8	39648	0.0468456
chrII:1237819-1238319	coding_promoter	promoter	2378	1562	459	chrII:1242461-1242961	putative_enhancer	enhancer	2386	753	185	47	4642	8.23e-11
chrII:1237819-1238319	coding_promoter	promoter	2378	1562	459	chrII:1244430-1244930	putative_enhancer	enhancer	2389	531	156	24	6611	1.21e-07
chrII:1239569-1240069	unassigned_promoter	promoter	2381	995	276	chrII:1242461-1242961	putative_enhancer	enhancer	2386	753	185	63	2892	8.23e-11
chrII:1239569-1240069	unassigned_promoter	promoter	2381	995	276	chrII:1244430-1244930	putative_enhancer	enhancer	2389	531	156	22	4861	6.25e-07
chrII:12603652-12604085	coding_promoter	promoter	24122	440	86	chrII:12659857-12660357	putative_enhancer	enhancer	24228	454	116	7	56239	0.0212299
chrII:12677891-12678351	coding_promoter	promoter	24262	482	99	chrII:12691264-12691764	putative_enhancer	enhancer	24288	446	87	12	13393	0.000181664
chrII:12679597-12680097	coding_promoter	promoter	24265	263	60	chrII:12691264-12691764	putative_enhancer	enhancer	24288	446	87	10	11667	0.00893354
chrII:12798633-12799133	coding_promoter	promoter	24496	1493	279	chrII:12800024-12800524	putative_enhancer	enhancer	24498	498	91	65	1391	8.23e-11
chrII:12798633-12799133	coding_promoter	promoter	24496	1493	279	chrII:12816505-12817005	putative_enhancer	enhancer	24529	440	77	26	17872	8.23e-11
chrII:12798633-12799133	coding_promoter	promoter	24496	1493	279	chrII:12939017-12939517	putative_enhancer	enhancer	24769	507	69	9	140384	1.7e-05
chrII:12798633-12799133	coding_promoter	promoter	24496	1493	279	chrII:12993909-12994409	putative_enhancer	enhancer	24875	326	84	6	195276	0.0140088
chrII:12798633-12799133	coding_promoter	promoter	24496	1493	279	chrII:13029931-13030395	putative_enhancer	enhancer	24942	515	136	6	231280	0.039891
chrII:12853327-12853827	coding_promoter	promoter	24601	234	49	chrII:12854651-12855151	putative_enhancer	enhancer	24603	352	65	19	1324	0.00148703
chrII:12878640-12879132	coding_promoter	promoter	24651	942	185	chrII:12892304-12892804	putative_enhancer	enhancer	24677	378	69	12	13668	0.00927612
chrII:12900936-12901436	coding_promoter	promoter	24695	305	63	chrII:12904047-12904547	putative_enhancer	enhancer	24701	330	65	24	3111	8.23e-11
chrII:12931348-12931848	coding_promoter	promoter	24754	432	75	chrII:13013883-13014383	putative_enhancer	enhancer	24913	529	125	6	82535	0.0298826
chrII:12944671-12945138	non-coding_RNA	promoter	24779	1219	216	chrII:12953219-12953719	putative_enhancer	enhancer	24795	711	101	48	8565	8.23e-11
chrII:12944671-12945138	non-coding_RNA	promoter	24779	1219	216	chrII:13025905-13026405	putative_enhancer	enhancer	24935	759	111	8	81251	0.0193141
chrII:12944671-12945138	non-coding_RNA	promoter	24779	1219	216	chrII:13107313-13107813	putative_enhancer	enhancer	25087	457	93	8	162659	0.000143445
chrII:12996111-12996611	coding_promoter	promoter	24879	759	144	chrII:13006128-13006628	putative_enhancer	enhancer	24897	497	73	12	10017	0.00578367
chrII:12996111-12996611	coding_promoter	promoter	24879	759	144	chrII:13025905-13026405	putative_enhancer	enhancer	24935	759	111	19	29794	8.23e-11
chrII:13004454-13004867	coding_promoter	promoter	24894	473	78	chrII:13107313-13107813	putative_enhancer	enhancer	25087	457	93	7	102903	2.76e-05
chrII:13030663-13031163	coding_promoter	promoter	24943	1267	268	chrII:13091198-13091698	putative_enhancer	enhancer	25055	311	75	8	60535	0.00143985
chrII:13072971-13073412	coding_promoter	promoter	25021	534	89	chrII:13074727-13075227	putative_enhancer	enhancer	25024	217	39	18	1786	0.000645253
chrII:1309320-1309743	coding_promoter	promoter	2514	309	67	chrII:1315210-1315710	putative_enhancer	enhancer	2525	386	86	17	5929	1.04e-06
chrII:13167336-13167752	unassigned_promoter	promoter	25203	319	47	chrII:13170612-13171112	putative_enhancer	enhancer	25210	328	75	13	3318	0.00668225
chrII:13189284-13189784	coding_promoter	promoter	25245	850	165	chrII:13193465-13193965	putative_enhancer	enhancer	25253	300	65	19	4181	1.13e-05
chrII:13195042-13195484	coding_promoter	promoter	25256	894	211	chrII:13198708-13199208	putative_enhancer	enhancer	25263	193	44	15	3695	0.0132717
chrII:13291425-13291925	coding_promoter	promoter	25446	1245	304	chrII:13292769-13293269	putative_enhancer	enhancer	25448	471	89	65	1344	8.23e-11
chrII:13291425-13291925	coding_promoter	promoter	25446	1245	304	chrII:13294477-13294977	putative_enhancer	enhancer	25451	328	73	21	3052	0.00703247
chrII:13291425-13291925	coding_promoter	promoter	25446	1245	304	chrII:13297175-13297675	putative_enhancer	enhancer	25456	393	73	18	5750	0.00168441
chrII:13291425-13291925	coding_promoter	promoter	25446	1245	304	chrII:13469058-13469528	putative_enhancer	enhancer	25793	1242	233	10	177618	1.31e-06
chrII:13299331-13299831	coding_promoter	promoter	25460	467	72	chrII:13333145-13333645	putative_enhancer	enhancer	25526	260	49	6	33814	0.0427067
chrII:13335128-13335628	unassigned_promoter	promoter	25530	2083	611	chrII:13469058-13469528	putative_enhancer	enhancer	25793	1242	233	9	133915	0.00681718
chrII:13335128-13335628	unassigned_promoter	promoter	25530	2083	611	chrII:13905913-13906413	putative_enhancer	enhancer	26635	304	70	7	570785	3.15e-06
chrII:13335128-13335628	unassigned_promoter	promoter	25530	2083	611	chrII:14038186-14038686	putative_enhancer	enhancer	26882	922	163	6	703058	0.00606469
chrII:13335128-13335628	unassigned_promoter	promoter	25530	2083	611	chrII:14044154-14044594	putative_enhancer	enhancer	26892	1041	239	10	708996	4.93e-10
chrII:13447552-13448052	coding_promoter	promoter	25752	537	155	chrII:13469058-13469528	putative_enhancer	enhancer	25793	1242	233	10	21491	0.0442669
chrII:13456475-13456975	unassigned_promoter	promoter	25769	1119	256	chrII:13460996-13461373	putative_enhancer	enhancer	25778	289	87	16	4459	0.00591501
chrII:13456475-13456975	unassigned_promoter	promoter	25769	1119	256	chrII:13464948-13465331	putative_enhancer	enhancer	25786	447	90	18	8414	2.04e-07
chrII:13456475-13456975	unassigned_promoter	promoter	25769	1119	256	chrII:13465331-13465694	putative_enhancer	enhancer	25787	602	127	17	8787	5.15e-06
chrII:13456475-13456975	unassigned_promoter	promoter	25769	1119	256	chrII:13469058-13469528	putative_enhancer	enhancer	25793	1242	233	58	12568	8.23e-11
chrII:13460569-13460996	coding_promoter	promoter	25777	553	135	chrII:13469058-13469528	putative_enhancer	enhancer	25793	1242	233	29	8511	8.23e-11
chrII:13461806-13462291	coding_promoter	promoter	25780	1302	287	chrII:13464948-13465331	putative_enhancer	enhancer	25786	447	90	34	3091	8.23e-11
chrII:13461806-13462291	coding_promoter	promoter	25780	1302	287	chrII:13465331-13465694	putative_enhancer	enhancer	25787	602	127	49	3464	8.23e-11
chrII:13461806-13462291	coding_promoter	promoter	25780	1302	287	chrII:13467739-13468239	putative_enhancer	enhancer	25791	562	134	50	5941	8.23e-11
chrII:13461806-13462291	coding_promoter	promoter	25780	1302	287	chrII:13469058-13469528	putative_enhancer	enhancer	25793	1242	233	117	7245	8.23e-11
chrII:13462291-13462782	unassigned_promoter	promoter	25781	402	116	chrII:13465331-13465694	putative_enhancer	enhancer	25787	602	127	15	2976	0.000383119
chrII:13462291-13462782	unassigned_promoter	promoter	25781	402	116	chrII:13469058-13469528	putative_enhancer	enhancer	25793	1242	233	24	6757	8.23e-11
chrII:13668747-13669243	coding_promoter	promoter	26179	584	117	chrII:13670765-13671265	putative_enhancer	enhancer	26183	266	60	20	2020	3.89e-06
chrII:13668747-13669243	coding_promoter	promoter	26179	584	117	chrII:13678262-13678701	putative_enhancer	enhancer	26197	351	106	12	9486	3.09e-05
chrII:13668747-13669243	coding_promoter	promoter	26179	584	117	chrII:13679893-13680301	putative_enhancer	enhancer	26200	367	74	9	11102	0.0125861
chrII:13673592-13674025	unassigned_promoter	promoter	26188	519	107	chrII:13678262-13678701	putative_enhancer	enhancer	26197	351	106	12	4673	0.0146511
chrII:13673592-13674025	unassigned_promoter	promoter	26188	519	107	chrII:13679893-13680301	putative_enhancer	enhancer	26200	367	74	13	6289	1.84e-05
chrII:13678701-13679141	unassigned_promoter	promoter	26198	617	152	chrII:13679893-13680301	putative_enhancer	enhancer	26200	367	74	27	1176	2.84e-06
chrII:13739316-13739816	coding_promoter	promoter	26314	362	85	chrII:13741131-13741631	putative_enhancer	enhancer	26317	130	43	20	1815	2.14e-08
chrII:13780694-13781194	pseudogene_promoter	promoter	26394	518	128	chrII:13953992-13954492	putative_enhancer	enhancer	26725	536	71	6	173298	0.00233657
chrII:13834238-13834697	coding_promoter	promoter	26496	587	164	chrII:13842382-13842882	putative_enhancer	enhancer	26512	227	58	14	8165	1.44e-06
chrII:13847282-13847782	unassigned_promoter	promoter	26521	474	114	chrII:13859750-13860250	putative_enhancer	enhancer	26546	425	84	10	12468	0.00354936
chrII:13903378-13903878	coding_promoter	promoter	26631	373	93	chrII:13905913-13906413	putative_enhancer	enhancer	26635	304	70	31	2535	8.23e-11
chrII:13957937-13958330	unassigned_promoter	promoter	26731	255	39	chrII:14049000-14049500	putative_enhancer	enhancer	26902	1308	221	6	91117	0.00504671
chrII:14004637-14005104	coding_promoter	promoter	26819	556	113	chrII:14042665-14043133	putative_enhancer	enhancer	26889	499	103	12	38029	8.23e-11
chrII:14004637-14005104	coding_promoter	promoter	26819	556	113	chrII:14049000-14049500	putative_enhancer	enhancer	26902	1308	221	16	44380	8.23e-11
chrII:14018153-14018642	non-coding_RNA	promoter	26846	951	199	chrII:14022009-14022509	putative_enhancer	enhancer	26853	304	90	21	3862	2.05e-05
[truncated: 12,993 more rows]
