# Supplementary material for: Accessible Region Conformation Capture (ARC-C) gives high-resolution insights into genome architecture and regulation
Source: Genome Res. 2022 Feb;32(2):357–66. doi: 10.1101/gr.275669.121 (PMC8805715; doi:10.1101/gr.275669.121)
Supplement: Supplemental Material [file supp_gr.275669.121_Supplemental_TableS3.xlsx]

## Sheet: Legend
Table S3 Interacting bin information and annotation
bin	bin coordinates
annotation_class	regulatory annotation if bin overlaps element identified in Janes et al 2018 (coding_promoter, unassigned_promoter, pseudogene-promoter, non-coding, putative_enhancer, no_activity); no_anotation if no overlap
class	annotation class: promoter (coding_promoter, unassigned_promoter, pseudogene_promoter, non-coding), enhancer (putative_enhancer), other (no_activity, no_annotation)
count.all	number of interacting bin partners
rex_overlap	overlap with rex and Prex sites given in Crane et al, 2015

## Sheet: Bin information
bin	annotation	class	count.all	count.RE	count.cod	rex_overlap
chrI:10002511-10003011	putative_enhancer	enhancer	1	1
chrI:1000725-1001225	putative_enhancer	enhancer	11	11	6
chrI:10025798-10026298	coding_promoter	promoter	1	1
chrI:10032440-10032891	putative_enhancer	enhancer	7	7	4
chrI:10034893-10035362	putative_enhancer	enhancer	9	9	6
chrI:10035797-10036228	putative_enhancer	enhancer	1	1
chrI:10036616-10036984	coding_promoter	promoter	1	1
chrI:10037468-10037968	coding_promoter	promoter	3	3	1
chrI:10039868-10040322	coding_promoter	promoter	1	1	1
chrI:10040322-10040776	putative_enhancer	enhancer	1	1	1
chrI:10045888-10046388	coding_promoter	promoter	2	2	1
chrI:10057414-10057914	putative_enhancer	enhancer	2	2
chrI:10059145-10059645	putative_enhancer	enhancer	1	1
chrI:10060051-10060551	putative_enhancer	enhancer	1	1
chrI:10089085-10089585	putative_enhancer	enhancer	2	2	1
chrI:10097133-10097633	putative_enhancer	enhancer	1	1
chrI:10102176-10102640	putative_enhancer	enhancer	1	1
chrI:10103024-10103448	putative_enhancer	enhancer	3	3	1
chrI:10103448-10103872	non-coding_RNA	promoter	2	2	1
chrI:10104049-10104549	putative_enhancer	enhancer	4	4	2
chrI:10104780-10105278	unassigned_promoter	promoter	4	4	1
chrI:10105278-10105777	coding_promoter	promoter	1	1
chrI:10116743-10117243	coding_promoter	promoter	4	4	1
chrI:10119101-10119601	coding_promoter	promoter	1	1	1
chrI:10119672-10120172	putative_enhancer	enhancer	1	1	1
chrI:10123458-10123958	coding_promoter	promoter	1	1	1
chrI:1014876-1015376	coding_promoter	promoter	5	4	4
chrI:10154847-10155347	coding_promoter	promoter	1	1	1
chrI:10161756-10162146	coding_promoter	promoter	2	2	1
chrI:1017320-1017820	coding_promoter	promoter	3	3	3
chrI:10173600-10174029	coding_promoter	promoter	3	3	2
chrI:10174712-10175174	coding_promoter	promoter	4	4	4
chrI:10185629-10186060	coding_promoter	promoter	1	1	1
chrI:10190808-10191308	coding_promoter	promoter	1	1	1
chrI:10192758-10193240	coding_promoter	promoter	1	1	1
chrI:10197016-10197516	coding_promoter	promoter	14	14	10
chrI:1022011-1022511	no_activity	other	1	1	1
chrI:10226790-10227290	coding_promoter	promoter	3	3	3
chrI:10231572-10232072	unassigned_promoter	promoter	5	5	3
chrI:10232440-10232940	unassigned_promoter	promoter	7	7	6
chrI:10235060-10235560	coding_promoter	promoter	15	15	10
chrI:10252555-10253055	unassigned_promoter	promoter	1	1	1
chrI:10259793-10260293	putative_enhancer	enhancer	2	2	2
chrI:10262060-10262560	coding_promoter	promoter	3	3	3
chrI:10278895-10279395	putative_enhancer	enhancer	1	1
chrI:10279983-10280483	no_annotation	other	1
chrI:10280514-10281014	unassigned_promoter	promoter	7	6	4
chrI:10281653-10282070	putative_enhancer	enhancer	1	1	1
chrI:10282512-10283012	no_activity	other	1	1	1
chrI:10283423-10283923	putative_enhancer	enhancer	2	2	2
chrI:10284273-10284773	putative_enhancer	enhancer	1	1	1
chrI:10285158-10285658	unassigned_promoter	promoter	1	1	1
chrI:10296337-10296810	putative_enhancer	enhancer	2	2	1
chrI:10296810-10297283	putative_enhancer	enhancer	1	1	1
chrI:10297297-10297797	no_annotation	other	1
chrI:10297812-10298312	coding_promoter	promoter	24	24	17
chrI:10330389-10330785	coding_promoter	promoter	2	2	1
chrI:1034195-1034620	coding_promoter	promoter	1	1	1
chrI:10350836-10351336	putative_enhancer	enhancer	1
chrI:10354663-10355163	no_activity	other	1	1
chrI:10355383-10355883	coding_promoter	promoter	1	1	1
chrI:10373828-10374188	coding_promoter	promoter	1	1	1
chrI:10381809-10382309	putative_enhancer	enhancer	3	3	3
chrI:10400535-10401035	coding_promoter	promoter	3	3	2
chrI:10403686-10404162	putative_enhancer	enhancer	5	5	4
chrI:10404785-10405245	coding_promoter	promoter	4	4	3
chrI:10405956-10406456	unassigned_promoter	promoter	4	4	3
chrI:10407410-10407910	unassigned_promoter	promoter	7	7	5
chrI:10408837-10409325	coding_promoter	promoter	4	4	3
chrI:10409325-10409814	putative_enhancer	enhancer	3	3	2
chrI:10429383-10429883	coding_promoter	promoter	2	2	1
chrI:10435632-10436100	coding_promoter	promoter	1	1
chrI:10474508-10475008	coding_promoter	promoter	2	2	2
chrI:10484849-10485319	coding_promoter	promoter	3	3	2
chrI:1049052-1049552	coding_promoter	promoter	1	1	1
chrI:10516936-10517436	coding_promoter	promoter	4	4	3
chrI:1052133-1052549	coding_promoter	promoter	1	1	1
chrI:10526230-10526730	coding_promoter	promoter	1	1	1
chrI:10532303-10532803	coding_promoter	promoter	2	2	2
chrI:1053528-1054028	putative_enhancer	enhancer	2	2	2
chrI:10539085-10539565	coding_promoter	promoter	14	14	10
chrI:10553661-10554161	coding_promoter	promoter	7	7	5
chrI:10560620-10560924	unassigned_promoter	promoter	2	2	1
chrI:10561321-10561795	putative_enhancer	enhancer	3	3	2
chrI:10562421-10562894	putative_enhancer	enhancer	12	12	9
chrI:10565014-10565497	coding_promoter	promoter	3	3	2
chrI:10567399-10567899	coding_promoter	promoter	2	2	1
chrI:10576990-10577490	coding_promoter	promoter	2	2	1
chrI:10585239-10585739	coding_promoter	promoter	6	6	3
chrI:10587450-10587863	putative_enhancer	enhancer	1	1	1
chrI:10592841-10593341	non-coding_RNA	promoter	4	4	3
chrI:10598320-10598820	coding_promoter	promoter	1	1
chrI:10606593-10607093	coding_promoter	promoter	1	1	1
chrI:1061904-1062404	coding_promoter	promoter	8	8	4
chrI:10622657-10623157	coding_promoter	promoter	1	1	1
chrI:10667586-10668086	coding_promoter	promoter	1	1	1
chrI:1066890-1067390	coding_promoter	promoter	2	2	1
chrI:1068116-1068616	coding_promoter	promoter	25	25	16
chrI:10682963-10683392	coding_promoter	promoter	1	1
chrI:1069068-1069529	putative_enhancer	enhancer	1	1	1
chrI:10691743-10692243	putative_enhancer	enhancer	2	2	1
chrI:1069529-1069912	coding_promoter	promoter	3	3	2
chrI:10698808-10699308	putative_enhancer	enhancer	1	1	1
chrI:1069912-1070333	putative_enhancer	enhancer	8	8	8
chrI:10728578-10729078	coding_promoter	promoter	1	1	1
chrI:10733559-10733963	coding_promoter	promoter	4	4
chrI:10744191-10744691	coding_promoter	promoter	3	3
chrI:10746338-10746838	putative_enhancer	enhancer	2	2	1
chrI:10747992-10748446	putative_enhancer	enhancer	2	2
chrI:10748446-10748900	putative_enhancer	enhancer	2	2	2
chrI:10749796-10750296	coding_promoter	promoter	5	4	2
chrI:10751648-10751998	no_activity	other	1	1	1
chrI:10751998-10752446	putative_enhancer	enhancer	4	4	1
chrI:10752993-10753305	unassigned_promoter	promoter	3	3	1
chrI:10753305-10753716	putative_enhancer	enhancer	1	1
chrI:10753741-10754169	putative_enhancer	enhancer	5	5	1
chrI:10754169-10754597	putative_enhancer	enhancer	3	3	1
chrI:10755697-10756197	putative_enhancer	enhancer	3	3	1
chrI:10756863-10757363	unassigned_promoter	promoter	19	19	5
chrI:10757870-10758370	putative_enhancer	enhancer	9	9	5
chrI:10758402-10758902	putative_enhancer	enhancer	1	1
chrI:10760187-10760607	putative_enhancer	enhancer	1	1	1
chrI:10760607-10761027	putative_enhancer	enhancer	3	3	1
chrI:10761649-10762104	putative_enhancer	enhancer	4	4	2
chrI:10762104-10762559	putative_enhancer	enhancer	3	3
chrI:10765614-10766114	putative_enhancer	enhancer	4	4	1
chrI:10766582-10767011	putative_enhancer	enhancer	3	3	1
chrI:10768624-10769071	putative_enhancer	enhancer	3	3	1
chrI:10769692-10770192	putative_enhancer	enhancer	22	22	7
chrI:1077159-1077659	putative_enhancer	enhancer	1	1	1
chrI:10777281-10777781	putative_enhancer	enhancer	8	8	4
chrI:10798496-10798996	coding_promoter	promoter	7	7	4
chrI:10806920-10807420	non-coding_RNA	promoter	4	4	3
chrI:10807537-10808037	no_annotation	other	1	1	1
chrI:108087-108587	coding_promoter	promoter	6	6	5
chrI:10816178-10816678	coding_promoter	promoter	8	7	4
chrI:10830693-10831193	coding_promoter	promoter	1	1	1
chrI:10833268-10833768	putative_enhancer	enhancer	4	3	3
chrI:10866453-10866953	coding_promoter	promoter	1	1	1
chrI:10874994-10875494	coding_promoter	promoter	6	6	3
chrI:10875854-10876354	coding_promoter	promoter	1	1
chrI:10881531-10882031	no_annotation	other	1	1
chrI:10894915-10895415	coding_promoter	promoter	2	2	2
chrI:10927300-10927774	non-coding_RNA	promoter	1	1	1
chrI:1095920-1096373	putative_enhancer	enhancer	1	1	1
chrI:10992509-10993009	putative_enhancer	enhancer	1	1
chrI:11002510-11003010	putative_enhancer	enhancer	1	1
chrI:110051-110505	coding_promoter	promoter	2	2	2
chrI:1100534-1101034	coding_promoter	promoter	3	3	2
chrI:1102093-1102593	putative_enhancer	enhancer	2	2	2
chrI:110505-110960	coding_promoter	promoter	1	1	1
chrI:11062735-11063235	coding_promoter	promoter	3	3	2
chrI:1106342-1106842	coding_promoter	promoter	3	3	1
chrI:11090074-11090574	putative_enhancer	enhancer	1	1	1
chrI:11091946-11092391	putative_enhancer	enhancer	2	2	2
chrI:11095591-11096091	unassigned_promoter	promoter	15	15	8
chrI:11097-11597	coding_promoter	promoter	6	6	4
chrI:11101100-11101504	coding_promoter	promoter	2	2	2
chrI:11105518-11106018	putative_enhancer	enhancer	1	1	1
chrI:11107758-11108258	putative_enhancer	enhancer	1	1	1
chrI:11169490-11169990	unassigned_promoter	promoter	8	8	5
chrI:11187001-11187501	coding_promoter	promoter	2	2	1
chrI:11188001-11188501	putative_enhancer	enhancer	7	7	4
chrI:11190914-11191414	putative_enhancer	enhancer	1	1
chrI:11196574-11196960	putative_enhancer	enhancer	5	5	4
chrI:11196960-11197421	putative_enhancer	enhancer	2	2	2
chrI:11198072-11198533	putative_enhancer	enhancer	1	1
chrI:11198533-11198995	non-coding_RNA	promoter	2	2	1
chrI:11200206-11200706	coding_promoter	promoter	4	4	2
chrI:11202246-11202746	unassigned_promoter	promoter	8	8	4
chrI:11203164-11203664	putative_enhancer	enhancer	5	5	2
chrI:11205434-11205934	unassigned_promoter	promoter	2	2	1
chrI:11222054-11222554	coding_promoter	promoter	1	1	1
chrI:11323079-11323579	coding_promoter	promoter	1	1	1
chrI:11348513-11349013	no_activity	other	1	1	1
chrI:11505330-11505692	non-coding_RNA	promoter	2	2	1
chrI:11529654-11530135	coding_promoter	promoter	2	2	2
chrI:11554368-11554868	coding_promoter	promoter	5	4	3
chrI:11559165-11559665	coding_promoter	promoter	1	1	1
chrI:1155932-1156432	coding_promoter	promoter	2	2	2
chrI:11577335-11577835	coding_promoter	promoter	3	3	3
chrI:11578127-11578627	coding_promoter	promoter	1	1
chrI:11579532-11580032	non-coding_RNA	promoter	2	2	1
chrI:11584043-11584458	coding_promoter	promoter	1	1	1
chrI:11584517-11584949	non-coding_RNA	promoter	1	1	1
chrI:11649213-11649713	coding_promoter	promoter	1	1	1
chrI:11693490-11693892	coding_promoter	promoter	1	1	1
chrI:11701555-11702055	coding_promoter	promoter	2	2	2
chrI:11755246-11755746	putative_enhancer	enhancer	1	1	1
chrI:11778942-11779442	putative_enhancer	enhancer	8	8	5
chrI:11782236-11782736	putative_enhancer	enhancer	5	5	3
chrI:11783448-11783948	unassigned_promoter	promoter	4	4	1
chrI:11784419-11784832	putative_enhancer	enhancer	4	4	1
chrI:11785874-11786323	putative_enhancer	enhancer	2	2
chrI:11789379-11789879	putative_enhancer	enhancer	2	2	2
chrI:11792687-11793187	coding_promoter	promoter	17	17	9
chrI:11798507-11799007	putative_enhancer	enhancer	1	1
chrI:11803090-11803521	non-coding_RNA	promoter	4	4	3
chrI:11807672-11808172	no_activity	other	1	1
chrI:11825332-11825757	putative_enhancer	enhancer	1	1
chrI:11829975-11830475	putative_enhancer	enhancer	5	5	3
chrI:11833068-11833568	coding_promoter	promoter	1	1	1
chrI:11836149-11836649	coding_promoter	promoter	3	3	1
chrI:11839433-11839933	putative_enhancer	enhancer	2	2	1
chrI:11840660-11841160	putative_enhancer	enhancer	13	12	9
chrI:11842352-11842852	putative_enhancer	enhancer	4	4	2
chrI:11870006-11870506	unassigned_promoter	promoter	8	8	1
chrI:11871662-11872162	unassigned_promoter	promoter	2	2	1
chrI:11873011-11873511	unassigned_promoter	promoter	9	9	4
chrI:11874843-11875238	putative_enhancer	enhancer	2	2	1
chrI:11875986-11876486	putative_enhancer	enhancer	6	6	4
chrI:11897023-11897504	pseudogene_promoter	promoter	2	2	2
chrI:11910817-11911292	coding_promoter	promoter	3	3	3
chrI:11929896-11930396	coding_promoter	promoter	5	5	5
chrI:11930425-11930922	coding_promoter	promoter	4	4	4
chrI:11932098-11932502	coding_promoter	promoter	1	1	1
chrI:11934083-11934583	unassigned_promoter	promoter	14	14	11
chrI:11937233-11937613	putative_enhancer	enhancer	3	3	3
chrI:11939874-11940374	unassigned_promoter	promoter	5	5	3
chrI:11962898-11963398	putative_enhancer	enhancer	1	1	1
chrI:11994723-11995223	coding_promoter	promoter	1	1	1
chrI:11996176-11996598	coding_promoter	promoter	2	2	2
chrI:11998979-11999356	unassigned_promoter	promoter	1	1	1
chrI:12039685-12040185	coding_promoter	promoter	21	20	16
chrI:12044321-12044814	no_activity	other	1	1	1
chrI:12055086-12055504	coding_promoter	promoter	4	4	3
chrI:12065213-12065653	coding_promoter	promoter	10	10	9
chrI:12065653-12066093	coding_promoter	promoter	1	1	1
chrI:12089828-12090328	coding_promoter	promoter	1	1	1
chrI:12097885-12098385	coding_promoter	promoter	2	2	2
chrI:12109704-12110204	no_activity	other	1	1	1
chrI:12112287-12112787	coding_promoter	promoter	3	2	2
chrI:12164562-12165062	coding_promoter	promoter	3	3	3
chrI:12179323-12179823	unassigned_promoter	promoter	2	2	2
chrI:12183129-12183626	coding_promoter	promoter	2	2	2
chrI:12184786-12185286	putative_enhancer	enhancer	1	1	1
chrI:12194081-12194581	unassigned_promoter	promoter	5	5	4
chrI:12198332-12198832	non-coding_RNA	promoter	2	2	2
chrI:12206471-12206971	coding_promoter	promoter	7	7	5
chrI:12229025-12229525	coding_promoter	promoter	1	1	1
chrI:12232298-12232798	coding_promoter	promoter	1	1	1
chrI:1226101-1226535	putative_enhancer	enhancer	4	4	2
chrI:1227705-1228205	putative_enhancer	enhancer	2	2	1
chrI:1229159-1229608	coding_promoter	promoter	13	13	4
chrI:1230304-1230739	coding_promoter	promoter	5	5	2
chrI:12429101-12429601	putative_enhancer	enhancer	1	1	1
chrI:12499491-12499991	putative_enhancer	enhancer	2	1	1
chrI:12501191-12501691	putative_enhancer	enhancer	1
chrI:12508126-12508608	coding_promoter	promoter	2	2	1
chrI:1251400-1251900	putative_enhancer	enhancer	13	12	7
chrI:12520339-12520839	coding_promoter	promoter	1	1	1
chrI:12524254-12524754	coding_promoter	promoter	22	22	17
chrI:12532311-12532608	coding_promoter	promoter	1	1	1
chrI:12534344-12534844	putative_enhancer	enhancer	5	5	4
chrI:12540552-12541052	no_activity	other	3	3	1
chrI:12546503-12546878	coding_promoter	promoter	1	1	1
chrI:12548065-12548482	putative_enhancer	enhancer	2	2	2
chrI:12550990-12551490	coding_promoter	promoter	9	9	6
chrI:1255891-1256391	putative_enhancer	enhancer	9	9	4
chrI:12562536-12563036	coding_promoter	promoter	1	1
chrI:12570774-12571274	putative_enhancer	enhancer	3	3	1
chrI:12571802-12572192	putative_enhancer	enhancer	2	2	2
chrI:12572256-12572706	putative_enhancer	enhancer	5	5	4
chrI:12572706-12573157	coding_promoter	promoter	1	1	1
chrI:12575154-12575611	coding_promoter	promoter	3	3	1
chrI:12575613-12576113	coding_promoter	promoter	8	7	4
chrI:12576174-12576674	putative_enhancer	enhancer	2	2	1
chrI:1257706-1258206	putative_enhancer	enhancer	1	1
chrI:1261453-1261953	putative_enhancer	enhancer	2	2	1
chrI:12652023-12652471	coding_promoter	promoter	2	2	2
chrI:12664789-12665289	coding_promoter	promoter	1	1	1
chrI:12675177-12675677	coding_promoter	promoter	3	3	2
chrI:12676064-12676564	unassigned_promoter	promoter	1	1	1
chrI:1269153-1269653	no_activity	other	1	1
chrI:1270904-1271332	coding_promoter	promoter	11	11	4
chrI:1271332-1271761	putative_enhancer	enhancer	5	5	2
chrI:1272377-1272877	unassigned_promoter	promoter	4	4	1
chrI:12727753-12728253	coding_promoter	promoter	1	1	1
chrI:12733387-12733887	no_activity	other	1	1	1
chrI:12736558-12737058	coding_promoter	promoter	26	25	19
chrI:1273775-1274275	putative_enhancer	enhancer	11	11	5
chrI:12741020-12741520	coding_promoter	promoter	2	2	2
chrI:12771447-12771947	coding_promoter	promoter	2	2	2
chrI:12806391-12806786	coding_promoter	promoter	2	2	2
chrI:12811685-12812185	coding_promoter	promoter	2	2	2
chrI:12812600-12813100	putative_enhancer	enhancer	2	2	2
chrI:12813780-12814280	coding_promoter	promoter	4	4	4
chrI:12815712-12816212	coding_promoter	promoter	30	29	20
chrI:12825427-12825927	no_annotation	other	1	1	1
chrI:12826471-12826971	coding_promoter	promoter	14	13	11
chrI:12844031-12844531	coding_promoter	promoter	1	1
chrI:12845631-12846131	putative_enhancer	enhancer	2	2	2
chrI:12858338-12858693	coding_promoter	promoter	3	3	3
chrI:12876958-12877458	coding_promoter	promoter	17	17	13
chrI:12893241-12893741	putative_enhancer	enhancer	1	1	1
chrI:12910208-12910708	no_activity	other	1	1	1
chrI:12917989-12918489	coding_promoter	promoter	5	5	4
chrI:12919203-12919615	coding_promoter	promoter	1	1	1
chrI:12920584-12920959	putative_enhancer	enhancer	1	1	1
chrI:12920959-12921334	unassigned_promoter	promoter	2	2	2
chrI:12931398-12931898	coding_promoter	promoter	1	1	1
chrI:12937594-12938094	coding_promoter	promoter	7	7	4
chrI:12942035-12942519	coding_promoter	promoter	1	1	1
chrI:12949693-12950193	putative_enhancer	enhancer	2	2	2
chrI:1295375-1295875	putative_enhancer	enhancer	6	6	2
chrI:12964325-12964724	coding_promoter	promoter	1	1	1
chrI:1296465-1296965	putative_enhancer	enhancer	4	4	1
chrI:12966222-12966688	coding_promoter	promoter	4	4	3
chrI:12966688-12967155	coding_promoter	promoter	7	7	4
chrI:12970133-12970633	coding_promoter	promoter	2	2	2
chrI:12973054-12973554	putative_enhancer	enhancer	3	3	2
chrI:12973905-12974405	coding_promoter	promoter	1	1
chrI:1299917-1300417	putative_enhancer	enhancer	4	4	2
chrI:1301393-1301893	unassigned_promoter	promoter	4	4	1
chrI:13027255-13027755	putative_enhancer	enhancer	2	2	1
chrI:1302839-1303339	putative_enhancer	enhancer	1	1	1
chrI:13031334-13031834	putative_enhancer	enhancer	8	8	4
chrI:13032488-13032988	putative_enhancer	enhancer	10	9	4
chrI:13033874-13034374	putative_enhancer	enhancer	1	1
chrI:13034637-13035137	putative_enhancer	enhancer	1	1	1
chrI:13036423-13036923	putative_enhancer	enhancer	7	7	3
chrI:13037962-13038462	putative_enhancer	enhancer	1	1
chrI:13040381-13040881	putative_enhancer	enhancer	7	7	5
chrI:13055052-13055552	no_annotation	other	1	1
chrI:13060273-13060773	putative_enhancer	enhancer	2	2	2
chrI:13060988-13061488	putative_enhancer	enhancer	4	4	2
chrI:13062512-13063012	coding_promoter	promoter	3	3	1
chrI:13063974-13064474	putative_enhancer	enhancer	5	5	2
chrI:13065704-13066204	coding_promoter	promoter	8	8	2
chrI:13103953-13104418	no_activity	other	1	1
chrI:1315374-1315874	putative_enhancer	enhancer	2	2
chrI:13156191-13156665	non-coding_RNA	promoter	1	1	1
chrI:13184599-13185099	coding_promoter	promoter	1	1
chrI:13287103-13287556	putative_enhancer	enhancer	5	4	2
chrI:13289639-13290139	coding_promoter	promoter	2	2
chrI:13290795-13291295	putative_enhancer	enhancer	7	7	5
chrI:13297554-13298054	non-coding_RNA	promoter	4	4	2
chrI:13310181-13310627	non-coding_RNA	promoter	3	3	1
chrI:13324440-13324855	coding_promoter	promoter	1	1
chrI:13330830-13331330	coding_promoter	promoter	3	3	2
chrI:13337043-13337543	coding_promoter	promoter	17	17	11
chrI:13338810-13339258	coding_promoter	promoter	3	3	1
chrI:13348949-13349449	putative_enhancer	enhancer	9	9	6
chrI:13350913-13351413	putative_enhancer	enhancer	12	12	8
chrI:13367438-13367938	putative_enhancer	enhancer	4	4	1
chrI:13368901-13369388	unassigned_promoter	promoter	5	5	2
chrI:13369529-13369960	putative_enhancer	enhancer	16	16	6
chrI:13369960-13370391	unassigned_promoter	promoter	2	2	1
chrI:13371040-13371447	putative_enhancer	enhancer	2	2	1
chrI:13371447-13371854	putative_enhancer	enhancer	3	3	2
chrI:13372335-13372835	putative_enhancer	enhancer	1	1
chrI:13372854-13373354	coding_promoter	promoter	29	29	20
chrI:13376425-13376925	coding_promoter	promoter	1	1	1
chrI:13381385-13381885	putative_enhancer	enhancer	3	3	2
chrI:13384455-13384955	coding_promoter	promoter	2	2	2
chrI:13391041-13391541	coding_promoter	promoter	4	4	3
chrI:13394987-13395487	coding_promoter	promoter	4	4	4
chrI:1339977-1340385	coding_promoter	promoter	2	2	1
chrI:13411334-13411742	coding_promoter	promoter	8	8	4
chrI:13417245-13417745	coding_promoter	promoter	2	2	2
chrI:13434177-13434677	putative_enhancer	enhancer	2	2	2
chrI:13463719-13464194	unassigned_promoter	promoter	2	2	1
chrI:13475372-13475872	coding_promoter	promoter	14	14	10
chrI:13490978-13491478	putative_enhancer	enhancer	4	4	3
chrI:13494991-13495491	unassigned_promoter	promoter	3	3	2
chrI:13500176-13500676	putative_enhancer	enhancer	1	1	1
chrI:13500840-13501340	putative_enhancer	enhancer	1	1	1
chrI:13505625-13506125	unassigned_promoter	promoter	3	3	2
chrI:13514197-13514612	coding_promoter	promoter	3	3	3
chrI:13533769-13534269	coding_promoter	promoter	4	4	3
chrI:13542163-13542627	coding_promoter	promoter	1	1	1
chrI:13545884-13546384	putative_enhancer	enhancer	1	1	1
chrI:13547163-13547663	coding_promoter	promoter	4	4	4
chrI:13559686-13560186	coding_promoter	promoter	1	1	1
chrI:13575771-13576221	coding_promoter	promoter	1	1	1
chrI:1361126-1361626	coding_promoter	promoter	15	15	9
chrI:13626111-13626611	coding_promoter	promoter	3	3	2
chrI:13628421-13628858	coding_promoter	promoter	1	1	1
chrI:13639147-13639647	coding_promoter	promoter	1	1	1
chrI:13650749-13651155	unassigned_promoter	promoter	5	5	5
chrI:1365250-1365750	putative_enhancer	enhancer	1	1	1
chrI:13653749-13654223	coding_promoter	promoter	4	4	4
chrI:13659298-13659798	coding_promoter	promoter	6	6	6
chrI:13663156-13663603	coding_promoter	promoter	11	11	9
chrI:1368647-1369147	putative_enhancer	enhancer	3	3	2
chrI:13688505-13688958	putative_enhancer	enhancer	1	1	1
chrI:13756303-13756741	coding_promoter	promoter	4	4	4
chrI:13843940-13844388	coding_promoter	promoter	1	1	1
chrI:13854097-13854597	coding_promoter	promoter	1	1	1
chrI:13951586-13952046	coding_promoter	promoter	2	2	2
chrI:139988-140488	no_annotation	other	1
chrI:14050968-14051415	coding_promoter	promoter	3	3	2
chrI:14051712-14052212	unassigned_promoter	promoter	4	4	2
chrI:14058704-14059172	non-coding_RNA	promoter	3	3	3
chrI:14066748-14067248	putative_enhancer	enhancer	1	1	1
chrI:14070693-14071193	coding_promoter	promoter	2	2	1
chrI:14072880-14073334	unassigned_promoter	promoter	1	1	1
chrI:14074253-14074753	unassigned_promoter	promoter	4	4	2
chrI:14075449-14075949	coding_promoter	promoter	7	7	5
chrI:14077510-14078010	putative_enhancer	enhancer	3	3	3
chrI:14100957-14101392	coding_promoter	promoter	2	2	2
chrI:14113104-14113601	coding_promoter	promoter	1	1	1
chrI:14155086-14155586	coding_promoter	promoter	1	1	1
chrI:14156888-14157388	coding_promoter	promoter	1	1	1
chrI:1415848-1416348	coding_promoter	promoter	2	2	2
chrI:14161572-14161965	coding_promoter	promoter	3	3	3
chrI:14167704-14168183	putative_enhancer	enhancer	1	1	1
chrI:14179569-14180069	unassigned_promoter	promoter	7	7	5
chrI:14181012-14181512	coding_promoter	promoter	6	6	3
chrI:14231136-14231636	coding_promoter	promoter	1	1	1
chrI:14245085-14245487	coding_promoter	promoter	1	1	1
chrI:14259945-14260426	putative_enhancer	enhancer	2	2	1
chrI:14260426-14260908	putative_enhancer	enhancer	3	3	2
chrI:14261870-14262370	putative_enhancer	enhancer	6	6	3
chrI:14320277-14320777	coding_promoter	promoter	4	4	2
chrI:14323495-14323995	putative_enhancer	enhancer	1	1	1
chrI:14344094-14344594	putative_enhancer	enhancer	1	1	1
chrI:14346512-14347012	coding_promoter	promoter	5	5	2
chrI:1435488-1435917	pseudogene_promoter	promoter	2	2
chrI:14358214-14358714	coding_promoter	promoter	1	1	1
chrI:14370983-14371483	coding_promoter	promoter	3	3	1
chrI:14384792-14385267	coding_promoter	promoter	1	1	1
chrI:14388722-14389222	putative_enhancer	enhancer	1	1	1
chrI:14405521-14406021	coding_promoter	promoter	2	2	2
chrI:14421836-14422336	coding_promoter	promoter	1	1	1
chrI:1444034-1444534	coding_promoter	promoter	2	2	2
chrI:14451796-14452296	coding_promoter	promoter	2	2	2
chrI:1446289-1446789	no_annotation	other	1	1
chrI:14465121-14465621	coding_promoter	promoter	5	5	4
chrI:1446829-1447329	non-coding_RNA	promoter	1	1	1
chrI:14469067-14469470	coding_promoter	promoter	1	1	1
chrI:14511440-14511940	putative_enhancer	enhancer	1	1
chrI:14520426-14520909	unassigned_promoter	promoter	4	4	2
chrI:14526734-14527234	putative_enhancer	enhancer	1	1	1
chrI:14528608-14529108	putative_enhancer	enhancer	5	5	4
chrI:14530724-14531224	coding_promoter	promoter	2	2
chrI:14532815-14533315	putative_enhancer	enhancer	3	3	1
chrI:1455159-1455659	putative_enhancer	enhancer	1
chrI:14604317-14604817	putative_enhancer	enhancer	2	2
chrI:14607321-14607821	putative_enhancer	enhancer	1	1
chrI:14609130-14609630	putative_enhancer	enhancer	3	3
chrI:14612587-14613087	putative_enhancer	enhancer	8	8	6
chrI:14616842-14617342	coding_promoter	promoter	2	2	1
chrI:14625605-14626101	coding_promoter	promoter	6	6	3
chrI:14627927-14628427	putative_enhancer	enhancer	5	5	4
chrI:14629358-14629858	no_activity	other	1	1	1
chrI:14630892-14631392	coding_promoter	promoter	3	3	1
chrI:14632486-14632895	putative_enhancer	enhancer	2	2	1
chrI:14633919-14634419	unassigned_promoter	promoter	2	2	1
chrI:14642423-14642923	coding_promoter	promoter	2	2	1
chrI:14647360-14647860	coding_promoter	promoter	8	7	4
chrI:14656996-14657496	putative_enhancer	enhancer	2	2	2
chrI:14662743-14663184	coding_promoter	promoter	2	2	1
chrI:14691995-14692405	coding_promoter	promoter	1	1	1
chrI:1470948-1471448	coding_promoter	promoter	3	3	2
chrI:14716237-14716737	coding_promoter	promoter	1	1	1
chrI:14737228-14737728	coding_promoter	promoter	1	1	1
chrI:14738243-14738743	no_annotation	other	1	1
chrI:14756216-14756650	coding_promoter	promoter	1	1	1
chrI:14758732-14759232	putative_enhancer	enhancer	1
chrI:14759277-14759767	coding_promoter	promoter	7	7	6
chrI:14764770-14765270	putative_enhancer	enhancer	1	1	1
chrI:14768765-14769265	coding_promoter	promoter	4	4	1
chrI:14787681-14788181	coding_promoter	promoter	1	1	1
chrI:14789830-14790266	coding_promoter	promoter	4	4	3
chrI:14806435-14806823	putative_enhancer	enhancer	3	3	1
chrI:1481435-1481935	coding_promoter	promoter	8	8	6
chrI:14833360-14833724	unassigned_promoter	promoter	1	1	1
chrI:14834806-14835306	coding_promoter	promoter	1	1	1
chrI:14844466-14844849	coding_promoter	promoter	4	4	1
chrI:14845499-14845974	putative_enhancer	enhancer	14	14	9
chrI:14855698-14856035	coding_promoter	promoter	4	4	3
chrI:14862062-14862562	putative_enhancer	enhancer	1	1	1
chrI:14863374-14863874	coding_promoter	promoter	3	3	2
chrI:14864837-14865337	coding_promoter	promoter	4	4	4
chrI:14867473-14867973	coding_promoter	promoter	7	7	6
chrI:14898556-14899056	putative_enhancer	enhancer	1	1	1
chrI:14899233-14899733	putative_enhancer	enhancer	5	5	2
chrI:14900497-14900911	putative_enhancer	enhancer	1	1
chrI:14901557-14902057	putative_enhancer	enhancer	1	1
chrI:14902731-14903193	coding_promoter	promoter	4	4	2
chrI:14905039-14905539	coding_promoter	promoter	2	2	1
chrI:14906167-14906667	coding_promoter	promoter	5	4	4
chrI:14907296-14907694	no_activity	other	1	1	1
chrI:14907846-14908346	putative_enhancer	enhancer	2	2	1
chrI:14917306-14917806	coding_promoter	promoter	2	2	1
chrI:14922589-14923089	putative_enhancer	enhancer	3	3	1
chrI:14924495-14924995	putative_enhancer	enhancer	7	7	4
chrI:14926061-14926561	putative_enhancer	enhancer	2	2
chrI:14927999-14928458	putative_enhancer	enhancer	2	2	2
chrI:14931308-14931699	coding_promoter	promoter	2	2
chrI:14931699-14932091	putative_enhancer	enhancer	2	2	1
chrI:14939814-14940314	putative_enhancer	enhancer	3	3	1
chrI:14945447-14945947	coding_promoter	promoter	6	6	4
chrI:14947999-14948427	putative_enhancer	enhancer	2	2
chrI:14948445-14948945	unassigned_promoter	promoter	1	1	1
chrI:14953081-14953517	coding_promoter	promoter	4	4	4
chrI:14971558-14972058	coding_promoter	promoter	7	7	2
chrI:14991532-14992032	coding_promoter	promoter	3	3	3
chrI:14992993-14993493	coding_promoter	promoter	4	4	4
chrI:14994295-14994795	coding_promoter	promoter	5	5	5
chrI:15013797-15014297	coding_promoter	promoter	2	2	2
chrI:15017079-15017478	coding_promoter	promoter	2	2	2
chrI:15030704-15031192	coding_promoter	promoter	1	1	1
chrI:15033816-15034316	coding_promoter	promoter	2	2	2
chrI:15035679-15036179	coding_promoter	promoter	1	1	1
chrI:15041467-15041967	unassigned_promoter	promoter	9	9	8
chrI:15052502-15052981	coding_promoter	promoter	2	2	2
chrI:15055883-15056383	putative_enhancer	enhancer	1	1	1
chrI:15058763-15059216	coding_promoter	promoter	5	5	4
chrI:151066-151566	no_annotation	other	1
chrI:15255-15651	unassigned_promoter	promoter	2	2	2
chrI:1540419-1540820	putative_enhancer	enhancer	7	7	7
chrI:1548074-1548574	putative_enhancer	enhancer	1	1	1
chrI:155856-156356	no_activity	other	7	7	5
chrI:1558999-1559499	coding_promoter	promoter	12	12	7
chrI:1562466-1562966	coding_promoter	promoter	7	7	4
chrI:1563939-1564439	putative_enhancer	enhancer	3	3	2
chrI:1565048-1565548	putative_enhancer	enhancer	2	2	2
chrI:1575447-1575947	non-coding_RNA	promoter	3	3	1
chrI:1581046-1581546	putative_enhancer	enhancer	1	1	1
chrI:1584978-1585478	putative_enhancer	enhancer	3	3	2
chrI:1588046-1588546	coding_promoter	promoter	1	1	1
chrI:159182-159682	unassigned_promoter	promoter	3	3	3
chrI:1598385-1598885	coding_promoter	promoter	1	1
chrI:1628462-1628962	coding_promoter	promoter	8	8	7
chrI:1634352-1634852	coding_promoter	promoter	1	1	1
chrI:1651207-1651707	coding_promoter	promoter	6	6	5
chrI:165713-166213	putative_enhancer	enhancer	1	1	1
chrI:166795-167295	coding_promoter	promoter	3	3	1
chrI:1676413-1676913	coding_promoter	promoter	7	7	4
chrI:16783-17283	unassigned_promoter	promoter	6	6	4
chrI:168506-169006	putative_enhancer	enhancer	2	1	1
chrI:1687569-1688069	coding_promoter	promoter	3	3	1
chrI:1688770-1689270	coding_promoter	promoter	1	1	1
chrI:1690937-1691328	putative_enhancer	enhancer	13	13	12
chrI:1691328-1691720	putative_enhancer	enhancer	8	8	7
chrI:1692959-1693459	non-coding_RNA	promoter	1	1	1
chrI:1693463-1693963	no_annotation	other	1	1	1
chrI:1694983-1695483	coding_promoter	promoter	7	6	4
chrI:1697818-1698318	coding_promoter	promoter	26	26	19
chrI:1701663-1702163	coding_promoter	promoter	2	2	1
chrI:171600-172006	putative_enhancer	enhancer	1	1	1
chrI:1717335-1717835	coding_promoter	promoter	10	10	8
chrI:1718976-1719476	coding_promoter	promoter	10	10	7
chrI:1720490-1720990	unassigned_promoter	promoter	1	1	1
chrI:172672-173088	putative_enhancer	enhancer	4	3	3
chrI:1750907-1751407	coding_promoter	promoter	1	1	1
chrI:177188-177688	coding_promoter	promoter	6	5	3
chrI:1777266-1777766	putative_enhancer	enhancer	3	3	3
chrI:1778604-1779104	coding_promoter	promoter	7	7	4
chrI:1792459-1792928	coding_promoter	promoter	6	6	3
chrI:180001-180501	coding_promoter	promoter	4	3	3
chrI:1832484-1832938	coding_promoter	promoter	4	4	3
chrI:1835358-1835858	coding_promoter	promoter	7	7	5
chrI:1836166-1836666	unassigned_promoter	promoter	8	8	6
chrI:1836713-1837213	putative_enhancer	enhancer	27	27	21
chrI:1840685-1841106	putative_enhancer	enhancer	1	1	1
chrI:1841834-1842297	putative_enhancer	enhancer	4	4	3
chrI:1844849-1845349	coding_promoter	promoter	3	3	2
chrI:1873685-1874185	coding_promoter	promoter	36	36	25
chrI:1877599-1878017	unassigned_promoter	promoter	3	3	2
chrI:1911548-1912048	putative_enhancer	enhancer	3	3	2
chrI:1912091-1912591	no_annotation	other	1	1	1
chrI:1913811-1914311	coding_promoter	promoter	7	6	3
chrI:1915788-1916288	putative_enhancer	enhancer	2	2	2
chrI:1919112-1919612	coding_promoter	promoter	3	3	2
chrI:2011124-2011624	coding_promoter	promoter	12	12	10
chrI:2011624-2012124	no_annotation	other	1	1	1
chrI:2019330-2019830	coding_promoter	promoter	4	4	3
chrI:2019877-2020377	unassigned_promoter	promoter	3	2	2
chrI:2021136-2021636	unassigned_promoter	promoter	9	9	7
chrI:2024523-2025023	unassigned_promoter	promoter	7	7	5
chrI:2025953-2026453	coding_promoter	promoter	1	1	1
chrI:2063825-2064269	coding_promoter	promoter	2	2	1
chrI:2070671-2071147	coding_promoter	promoter	3	3	1
chrI:2076789-2077289	putative_enhancer	enhancer	5	5	3
chrI:2077974-2078474	putative_enhancer	enhancer	1	1
chrI:2084761-2085261	non-coding_RNA	promoter	10	10	8
chrI:2096846-2097346	coding_promoter	promoter	2	2	1
chrI:2119206-2119706	coding_promoter	promoter	2	2
chrI:2120568-2121068	putative_enhancer	enhancer	4	4	2
chrI:2125047-2125547	putative_enhancer	enhancer	3	3	2
chrI:2126648-2127148	coding_promoter	promoter	5	5	3
chrI:2151593-2152093	coding_promoter	promoter	1	1	1
chrI:2153832-2154332	putative_enhancer	enhancer	1	1	1
chrI:2155406-2155857	unassigned_promoter	promoter	10	10	5
chrI:2155857-2156187	putative_enhancer	enhancer	2	2	2
chrI:2156972-2157462	coding_promoter	promoter	2	2	1
chrI:2167730-2168230	putative_enhancer	enhancer	1	1	1
chrI:2179787-2180287	putative_enhancer	enhancer	2	2	1
chrI:2184742-2185242	putative_enhancer	enhancer	4	4	2
chrI:2190359-2190859	unassigned_promoter	promoter	3	3	3
chrI:2211528-2212016	unassigned_promoter	promoter	1	1
chrI:2247542-2248042	coding_promoter	promoter	1	1	1
chrI:2249058-2249558	coding_promoter	promoter	1	1	1
chrI:2276873-2277373	coding_promoter	promoter	1	1	1
chrI:2280233-2280733	coding_promoter	promoter	1	1	1
chrI:2290980-2291404	coding_promoter	promoter	15	15	12
chrI:2291404-2291829	putative_enhancer	enhancer	2	2	2
chrI:2292696-2293196	coding_promoter	promoter	9	9	6
chrI:2299523-2300023	coding_promoter	promoter	2	2	2
chrI:230336-230836	putative_enhancer	enhancer	1	1
chrI:2306668-2307097	coding_promoter	promoter	2	2	2
chrI:2312100-2312560	coding_promoter	promoter	1	1	1
chrI:2312874-2313374	coding_promoter	promoter	3	3	3
chrI:231791-232291	putative_enhancer	enhancer	1	1
chrI:2321713-2322213	coding_promoter	promoter	1	1	1
chrI:232469-232969	putative_enhancer	enhancer	1
chrI:237549-237953	no_activity	other	1	1
chrI:2393272-2393772	coding_promoter	promoter	4	4	3
chrI:2401408-2401908	coding_promoter	promoter	1	1	1
chrI:2420525-2420927	coding_promoter	promoter	1	1	1
chrI:2421600-2422100	coding_promoter	promoter	2	2	1
chrI:2433508-2433950	coding_promoter	promoter	4	4	4
chrI:2436750-2437250	coding_promoter	promoter	2	2	2
chrI:2514086-2514572	pseudogene_promoter	promoter	2	2	2
chrI:2574410-2574910	no_annotation	other	1	1	1
chrI:2577138-2577638	coding_promoter	promoter	1	1	1
chrI:2579992-2580492	coding_promoter	promoter	2	2	2
chrI:2586181-2586585	coding_promoter	promoter	4	4	2
chrI:2587475-2587975	putative_enhancer	enhancer	13	13	9
chrI:2591379-2591879	unassigned_promoter	promoter	1	1	1
chrI:2594171-2594671	putative_enhancer	enhancer	1	1
chrI:2597308-2597808	putative_enhancer	enhancer	1	1	1
chrI:2598351-2598758	coding_promoter	promoter	5	5	3
chrI:2603549-2604049	coding_promoter	promoter	10	10	8
chrI:2605220-2605720	coding_promoter	promoter	4	3	3
chrI:2628064-2628552	coding_promoter	promoter	3	3	3
chrI:2628552-2629040	unassigned_promoter	promoter	1	1
chrI:2639568-2640068	putative_enhancer	enhancer	1	1	1
chrI:2654357-2654857	unassigned_promoter	promoter	1	1	1
chrI:2656946-2657446	coding_promoter	promoter	5	5	3
chrI:2659873-2660289	putative_enhancer	enhancer	2	2	1
chrI:2665717-2666217	putative_enhancer	enhancer	5	5	2
chrI:2667739-2668164	coding_promoter	promoter	7	7	4
chrI:2668164-2668553	putative_enhancer	enhancer	1	1
chrI:2668553-2669017	coding_promoter	promoter	2	2	2
chrI:2677977-2678477	putative_enhancer	enhancer	2	2	2
chrI:2679369-2679869	unassigned_promoter	promoter	2	2	1
chrI:2681327-2681827	putative_enhancer	enhancer	1	1	1
chrI:26817-27317	coding_promoter	promoter	2	2	2
chrI:2682830-2683303	coding_promoter	promoter	6	6	4
chrI:2688694-2689194	non-coding_RNA	promoter	2	2	1
chrI:2703116-2703616	coding_promoter	promoter	2	2	1
chrI:2704301-2704801	putative_enhancer	enhancer	1	1	1
chrI:2706025-2706463	coding_promoter	promoter	4	4	3
chrI:2708151-2708651	putative_enhancer	enhancer	1	1	1
chrI:2726548-2726934	coding_promoter	promoter	1	1
chrI:2727468-2727968	coding_promoter	promoter	10	10	9
chrI:2728604-2729104	coding_promoter	promoter	3	3	2
chrI:2747549-2748049	coding_promoter	promoter	2	2	2
chrI:2760826-2761326	coding_promoter	promoter	4	4	4
chrI:2773719-2774219	coding_promoter	promoter	1	1	1
chrI:2776029-2776529	coding_promoter	promoter	2	2	2
chrI:2791326-2791826	coding_promoter	promoter	2	2	2
chrI:2794436-2794936	no_annotation	other	1	1
chrI:2800681-2801181	coding_promoter	promoter	4	4	2
chrI:2831748-2832164	putative_enhancer	enhancer	2	2	2
chrI:2835181-2835632	putative_enhancer	enhancer	4	3	3
chrI:2848310-2848810	unassigned_promoter	promoter	2	2	1
chrI:2850675-2851175	unassigned_promoter	promoter	5	5	3
chrI:2857528-2858028	coding_promoter	promoter	3	3	2
chrI:2860953-2861453	coding_promoter	promoter	2	2	1
chrI:2863907-2864407	putative_enhancer	enhancer	11	11	9
chrI:2869762-2870262	putative_enhancer	enhancer	1	1
chrI:2876401-2876901	coding_promoter	promoter	6	6	5
chrI:288936-289436	coding_promoter	promoter	3	3	1
chrI:290202-290702	putative_enhancer	enhancer	1	1	1
chrI:2927950-2928450	coding_promoter	promoter	3	3	2
chrI:293022-293522	coding_promoter	promoter	1	1	1
chrI:2935486-2935986	coding_promoter	promoter	3	3	1
chrI:2960443-2960943	putative_enhancer	enhancer	2	2	2
chrI:2962338-2962746	coding_promoter	promoter	1	1
chrI:2967541-2968041	putative_enhancer	enhancer	1	1	1
chrI:298255-298755	putative_enhancer	enhancer	2	2	1
chrI:299597-300097	putative_enhancer	enhancer	5	5	4
chrI:3010241-3010741	coding_promoter	promoter	1	1	1
chrI:3011624-3012124	coding_promoter	promoter	1	1	1
chrI:3058964-3059464	coding_promoter	promoter	1	1	1
chrI:3069915-3070415	coding_promoter	promoter	1	1	1
chrI:3096088-3096588	coding_promoter	promoter	2	2	2
chrI:3101626-3102075	unassigned_promoter	promoter	8	7	7
chrI:3103013-3103513	coding_promoter	promoter	1	1	1
chrI:310727-311172	putative_enhancer	enhancer	2	2	1
chrI:3113512-3113927	no_activity	other	1	1
chrI:3113927-3114342	no_activity	other	2	2	1
chrI:3118925-3119425	coding_promoter	promoter	5	4	3
chrI:3121576-3121979	putative_enhancer	enhancer	1	1	1
chrI:3127547-3128047	no_annotation	other	1	1	1
chrI:3129559-3130059	putative_enhancer	enhancer	2
chrI:3140430-3140930	coding_promoter	promoter	3	3	3
chrI:3142976-3143476	coding_promoter	promoter	2	2	2
chrI:3147794-3148294	coding_promoter	promoter	1	1	1
chrI:315052-315432	coding_promoter	promoter	2	2	1
chrI:315432-315812	putative_enhancer	enhancer	1	1
chrI:315972-316472	putative_enhancer	enhancer	1	1	1
chrI:3162362-3162862	coding_promoter	promoter	4	4	4
chrI:3204948-3205365	coding_promoter	promoter	2	2	1
chrI:3206303-3206803	coding_promoter	promoter	2	2	2
chrI:3227848-3228348	coding_promoter	promoter	2	2	2
chrI:323394-323894	coding_promoter	promoter	1	1
chrI:3246082-3246477	putative_enhancer	enhancer	2	2	2
chrI:3246477-3246872	putative_enhancer	enhancer	3	3	2
chrI:3247333-3247734	putative_enhancer	enhancer	2	2	2
chrI:3247734-3248112	putative_enhancer	enhancer	1	1	1
chrI:3248112-3248475	coding_promoter	promoter	3	3	1
chrI:3248475-3248950	coding_promoter	promoter	3	3
chrI:3248951-3249451	coding_promoter	promoter	3	3
chrI:3251039-3251502	putative_enhancer	enhancer	1	1	1
chrI:3277720-3278220	coding_promoter	promoter	1	1
chrI:3280638-3281138	putative_enhancer	enhancer	1	1	1
chrI:3296960-3297460	coding_promoter	promoter	2	2	2
chrI:3298104-3298604	coding_promoter	promoter	1	1	1
chrI:3309517-3310017	coding_promoter	promoter	4	4	3
chrI:3316444-3316944	coding_promoter	promoter	3	3	2
chrI:3324828-3325328	unassigned_promoter	promoter	1	1	1
chrI:3330728-3331228	coding_promoter	promoter	7	7	6
chrI:3332594-3333094	unassigned_promoter	promoter	3	3	2
chrI:3334384-3334884	putative_enhancer	enhancer	7	7	6
chrI:3338199-3338699	putative_enhancer	enhancer	2	2
chrI:3349859-3350294	coding_promoter	promoter	3	3	2
chrI:3381548-3382048	putative_enhancer	enhancer	3	3	2
chrI:3382548-3383048	putative_enhancer	enhancer	2	2	1
chrI:3386324-3386824	coding_promoter	promoter	3	3	1
chrI:3405538-3406038	coding_promoter	promoter	2	2	1
chrI:3409715-3410143	coding_promoter	promoter	1	1	1
chrI:3417871-3418371	putative_enhancer	enhancer	1	1	1
chrI:3438855-3439231	coding_promoter	promoter	1	1	1
chrI:34507-34951	putative_enhancer	enhancer	1	1	1
chrI:3501077-3501556	coding_promoter	promoter	7	7	7
chrI:3502555-3503055	coding_promoter	promoter	1	1	1
chrI:3514223-3514723	coding_promoter	promoter	5	5	4
chrI:3515369-3515869	putative_enhancer	enhancer	2	2	2
chrI:35206-35706	putative_enhancer	enhancer	3	3	3
chrI:3529785-3530283	coding_promoter	promoter	1	1	1
chrI:3530830-3531330	coding_promoter	promoter	3	3	3
chrI:3533629-3534129	coding_promoter	promoter	1	1
chrI:3534390-3534890	coding_promoter	promoter	1	1	1
chrI:3559914-3560414	putative_enhancer	enhancer	1	1	1
chrI:3562845-3563247	coding_promoter	promoter	1	1	1
chrI:3563777-3564277	coding_promoter	promoter	1	1
chrI:3600643-3601143	coding_promoter	promoter	1	1	1
chrI:3605562-3606062	coding_promoter	promoter	1	1	1
chrI:3636443-3636943	coding_promoter	promoter	7	7	6
chrI:3638703-3639203	non-coding_RNA	promoter	1	1	1
chrI:3647997-3648497	coding_promoter	promoter	10	10	7
chrI:3650615-3651115	putative_enhancer	enhancer	1	1	1
chrI:3651-4126	non-coding_RNA	promoter	11	11	8
chrI:3663434-3663882	coding_promoter	promoter	1	1	1
chrI:3671656-3672156	coding_promoter	promoter	3	3	3
chrI:3672595-3673095	coding_promoter	promoter	2	2	1
chrI:3675665-3676165	coding_promoter	promoter	2	2	2
chrI:3679929-3680429	putative_enhancer	enhancer	2	2	2
chrI:3680714-3681214	coding_promoter	promoter	1	1	1
chrI:3681866-3682366	coding_promoter	promoter	12	12	10
chrI:3684347-3684807	coding_promoter	promoter	1	1	1
chrI:3709783-3710228	coding_promoter	promoter	2	2	2
chrI:3710625-3711077	putative_enhancer	enhancer	2	1	1
chrI:3718682-3719182	no_annotation	other	1	1
chrI:3720672-3721172	unassigned_promoter	promoter	1	1	1
chrI:3721272-3721651	coding_promoter	promoter	12	12	11
chrI:3721651-3722031	coding_promoter	promoter	14	14	12
chrI:3723349-3723849	coding_promoter	promoter	13	13	10
chrI:3724594-3725094	coding_promoter	promoter	10	9	6
chrI:3738082-3738582	putative_enhancer	enhancer	8	8	7
chrI:3739230-3739663	coding_promoter	promoter	5	5	3
chrI:3740308-3740798	coding_promoter	promoter	26	26	21
chrI:3749093-3749593	putative_enhancer	enhancer	1	1	1
chrI:3751271-3751771	putative_enhancer	enhancer	1	1	1
chrI:3753827-3754327	no_annotation	other	1	1	1
chrI:3754376-3754876	putative_enhancer	enhancer	8	8	6
chrI:3758955-3759455	coding_promoter	promoter	15	15	11
chrI:3781502-3782002	coding_promoter	promoter	3	3	3
chrI:3785132-3785632	coding_promoter	promoter	9	9	9
chrI:3785853-3786353	putative_enhancer	enhancer	1	1	1
chrI:3787529-3788016	coding_promoter	promoter	2	2	2
chrI:3793314-3793814	coding_promoter	promoter	2	2	1
chrI:3805515-3805940	unassigned_promoter	promoter	3	3	2
chrI:3806470-3806970	coding_promoter	promoter	8	8	7
chrI:381406-381821	putative_enhancer	enhancer	2	2	1
chrI:3822614-3823072	putative_enhancer	enhancer	6	6	6
chrI:382271-382695	coding_promoter	promoter	2	2	2
chrI:3824164-3824595	coding_promoter	promoter	10	10	9
chrI:3829201-3829651	coding_promoter	promoter	1	1	1
chrI:3829651-3830099	coding_promoter	promoter	4	4	3
chrI:3842354-3842854	coding_promoter	promoter	1	1	1
chrI:3858053-3858553	putative_enhancer	enhancer	1	1	1
chrI:3861848-3862293	coding_promoter	promoter	1	1
chrI:38811-39311	putative_enhancer	enhancer	3	3	2
chrI:3889104-3889604	putative_enhancer	enhancer	1	1	1
chrI:3891386-3891886	coding_promoter	promoter	3	3	2
chrI:3899682-3900147	coding_promoter	promoter	2	2	1
chrI:3906130-3906630	coding_promoter	promoter	1	1	1
chrI:3908362-3908852	coding_promoter	promoter	1	1	1
chrI:395089-395589	coding_promoter	promoter	2	2	2
chrI:3956530-3957030	putative_enhancer	enhancer	1	1	1
chrI:3958355-3958855	coding_promoter	promoter	3	3	1
chrI:3959418-3959918	putative_enhancer	enhancer	1	1	1
chrI:39601-40101	unassigned_promoter	promoter	9	8	5
chrI:3976028-3976528	putative_enhancer	enhancer	1	1
chrI:397669-398169	coding_promoter	promoter	15	15	11
chrI:3982742-3983242	coding_promoter	promoter	1	1
chrI:3987047-3987547	putative_enhancer	enhancer	1	1	1
chrI:3988603-3989065	putative_enhancer	enhancer	1	1
chrI:3990915-3991415	coding_promoter	promoter	2	2	2
chrI:3992256-3992655	coding_promoter	promoter	2	2	2
chrI:3994388-3994888	coding_promoter	promoter	5	4	4
chrI:4005650-4006033	putative_enhancer	enhancer	7	7	6
chrI:4007124-4007624	putative_enhancer	enhancer	1	1
chrI:4008085-4008585	unassigned_promoter	promoter	4	4	3
chrI:4011232-4011732	putative_enhancer	enhancer	1	1
chrI:4012738-4013238	putative_enhancer	enhancer	1	1	1
chrI:4018334-4018834	putative_enhancer	enhancer	1	1	1
chrI:4020458-4020940	coding_promoter	promoter	2	2
chrI:4029224-4029724	putative_enhancer	enhancer	2	2	1
chrI:4030458-4030958	putative_enhancer	enhancer	4	4	2
chrI:4032392-4032892	coding_promoter	promoter	11	11	7
chrI:4035291-4035791	coding_promoter	promoter	4	4	2
chrI:4036814-4037314	putative_enhancer	enhancer	1	1	1
chrI:4046581-4047081	unassigned_promoter	promoter	3	3	1
chrI:4050454-4050954	putative_enhancer	enhancer	1	1	1
chrI:40694-41194	putative_enhancer	enhancer	1	1
chrI:4099454-4099883	no_activity	other	1	1	1
chrI:4155515-4156015	putative_enhancer	enhancer	2	2	1
chrI:4157992-4158492	putative_enhancer	enhancer	4	4	3
chrI:4161011-4161511	coding_promoter	promoter	2	2
chrI:4161739-4162239	coding_promoter	promoter	1	1
chrI:4171910-4172410	coding_promoter	promoter	11	11	8
chrI:4173658-4174151	coding_promoter	promoter	3	3	3
chrI:4174900-4175320	coding_promoter	promoter	2	2	2
chrI:4175710-4176210	non-coding_RNA	promoter	1	1	1
chrI:4178374-4178874	coding_promoter	promoter	5	5	4
chrI:4186232-4186692	coding_promoter	promoter	1	1	1
chrI:41951-42451	coding_promoter	promoter	13	13	8
chrI:4222968-4223468	putative_enhancer	enhancer	1	1
chrI:4224716-4225216	putative_enhancer	enhancer	3	3	2
chrI:4247357-4247857	coding_promoter	promoter	1	1	1
chrI:4253865-4254365	unassigned_promoter	promoter	14	14	10
chrI:429046-429546	putative_enhancer	enhancer	6	6	5
chrI:42925-43333	putative_enhancer	enhancer	2	2	1
chrI:4297898-4298398	coding_promoter	promoter	33	33	17
chrI:4298980-4299443	putative_enhancer	enhancer	4	4	3
chrI:4299443-4299906	putative_enhancer	enhancer	3	3	1
chrI:4303752-4304252	putative_enhancer	enhancer	3	3	2
chrI:4311516-4312016	putative_enhancer	enhancer	9	9	4
chrI:4314258-4314758	putative_enhancer	enhancer	4	4	3
chrI:4316228-4316728	putative_enhancer	enhancer	3	3	2
chrI:4317008-4317508	putative_enhancer	enhancer	2	2	1
chrI:4320611-4321111	coding_promoter	promoter	11	11	3
chrI:4322286-4322682	putative_enhancer	enhancer	1	1	1
chrI:4322682-4323078	putative_enhancer	enhancer	5	5	3
chrI:4323846-4324346	putative_enhancer	enhancer	4	4	2
chrI:4327890-4328390	unassigned_promoter	promoter	4	4	2
chrI:4328791-4329250	putative_enhancer	enhancer	5	5	2
chrI:4329250-4329709	putative_enhancer	enhancer	2	2	1
chrI:4330424-4330924	unassigned_promoter	promoter	10	10	3
chrI:4332098-4332598	putative_enhancer	enhancer	5	5	3
chrI:4333738-4334238	putative_enhancer	enhancer	4	4	2
chrI:4334286-4334786	putative_enhancer	enhancer	5	5	3
chrI:433472-433972	unassigned_promoter	promoter	7	7	4
chrI:434438-434938	putative_enhancer	enhancer	5	5	3
chrI:435367-435867	putative_enhancer	enhancer	1	1	1
chrI:437997-438454	putative_enhancer	enhancer	1	1	1
chrI:4386328-4386828	coding_promoter	promoter	3	3	3
chrI:441995-442495	putative_enhancer	enhancer	1	1	1
chrI:4431799-4432299	putative_enhancer	enhancer	3	3	2
chrI:4433878-4434378	putative_enhancer	enhancer	1	1
chrI:4434560-4434972	putative_enhancer	enhancer	2	2	1
chrI:4436613-4437113	putative_enhancer	enhancer	7	7	3
chrI:4437818-4438318	putative_enhancer	enhancer	1	1
chrI:4440101-4440601	putative_enhancer	enhancer	2	2	1
chrI:4444231-4444731	coding_promoter	promoter	2	2
chrI:4471634-4472134	putative_enhancer	enhancer	1	1	1
chrI:4474982-4475482	coding_promoter	promoter	3	3	1
chrI:4484909-4485285	unassigned_promoter	promoter	2	2	1
chrI:4486551-4487035	putative_enhancer	enhancer	6	6	2
chrI:4487035-4487519	putative_enhancer	enhancer	1	1
chrI:4489364-4489864	putative_enhancer	enhancer	4	4	2
chrI:4490353-4490853	putative_enhancer	enhancer	16	16	13
chrI:4494790-4495290	coding_promoter	promoter	1	1
chrI:4511014-4511514	coding_promoter	promoter	1	1	1
chrI:4516044-4516544	coding_promoter	promoter	7	7	3
chrI:4516869-4517369	coding_promoter	promoter	2	2	1
chrI:4528788-4529288	putative_enhancer	enhancer	1	1	1
chrI:4535901-4536401	coding_promoter	promoter	25	25	18
chrI:4539798-4540298	coding_promoter	promoter	1	1	1
chrI:4557006-4557500	coding_promoter	promoter	5	5	5
chrI:4563763-4564263	coding_promoter	promoter	1	1	1
chrI:4584636-4585048	coding_promoter	promoter	8	8	8
chrI:4602809-4603309	coding_promoter	promoter	3	3	3
chrI:461496-461996	coding_promoter	promoter	1	1	1
chrI:4633544-4633931	coding_promoter	promoter	1	1	1
chrI:4636273-4636773	coding_promoter	promoter	6	6	6
chrI:4643165-4643665	coding_promoter	promoter	2	2	2
chrI:4644188-4644688	coding_promoter	promoter	6	6	6
chrI:4647071-4647523	coding_promoter	promoter	5	5	5
chrI:4651644-4652144	coding_promoter	promoter	8	8	7
chrI:4653627-4654044	coding_promoter	promoter	6	6	6
chrI:4654044-4654461	coding_promoter	promoter	9	9	8
chrI:4671614-4672089	coding_promoter	promoter	3	3	3
chrI:4672089-4672558	coding_promoter	promoter	2	2	2
chrI:4672558-4673053	putative_enhancer	enhancer	4	4	4
chrI:4673743-4674243	unassigned_promoter	promoter	9	9	8
chrI:4684325-4684825	non-coding_RNA	promoter	1	1	1
chrI:4699223-4699723	unassigned_promoter	promoter	29	29	23
chrI:4701065-4701565	coding_promoter	promoter	21	21	19
chrI:4701715-4702215	putative_enhancer	enhancer	3	3	3
chrI:4703069-4703569	coding_promoter	promoter	3	3	3
chrI:470871-471371	unassigned_promoter	promoter	1	1
chrI:4720950-4721450	coding_promoter	promoter	13	12	8
chrI:4726472-4726972	no_activity	other	1	1	1
chrI:4726974-4727474	coding_promoter	promoter	5	5	5
chrI:4731275-4731775	coding_promoter	promoter	1	1	1
chrI:4744640-4745140	coding_promoter	promoter	1	1
chrI:4745254-4745704	coding_promoter	promoter	4	4	4
chrI:4772899-4773399	coding_promoter	promoter	4	4	3
chrI:4785895-4786258	putative_enhancer	enhancer	1	1	1
chrI:4789755-4790255	coding_promoter	promoter	1	1	1
chrI:4792361-4792861	coding_promoter	promoter	1	1
chrI:4804300-4804733	coding_promoter	promoter	1	1	1
chrI:4835159-4835659	putative_enhancer	enhancer	1	1
chrI:4840792-4841292	putative_enhancer	enhancer	1	1
chrI:4847568-4847962	putative_enhancer	enhancer	1	1	1
chrI:487654-488154	no_annotation	other	1	1	1
chrI:4881096-4881596	unassigned_promoter	promoter	3	3	3
chrI:488169-488669	coding_promoter	promoter	2	2	1
chrI:489705-490205	coding_promoter	promoter	3	3	3
chrI:4900781-4901281	coding_promoter	promoter	1	1	1
chrI:4911387-4911830	putative_enhancer	enhancer	1	1	1
chrI:4914175-4914654	coding_promoter	promoter	12	12	8
chrI:4916021-4916392	coding_promoter	promoter	1	1	1
chrI:4917252-4917639	putative_enhancer	enhancer	1	1	1
chrI:4917639-4918020	coding_promoter	promoter	1	1	1
chrI:4926310-4926810	coding_promoter	promoter	3	3	3
chrI:4932796-4933242	coding_promoter	promoter	4	4	3
chrI:4933242-4933701	putative_enhancer	enhancer	1	1
chrI:4936061-4936561	putative_enhancer	enhancer	5	5	2
chrI:4940861-4941247	putative_enhancer	enhancer	1	1
chrI:4941247-4941634	coding_promoter	promoter	1	1
chrI:4974613-4975046	putative_enhancer	enhancer	2	2	2
chrI:4979912-4980412	coding_promoter	promoter	1	1	1
chrI:4996424-4996924	coding_promoter	promoter	1	1	1
chrI:5008513-5008939	coding_promoter	promoter	2	2
chrI:5009831-5010331	putative_enhancer	enhancer	1	1	1
chrI:5014589-5015089	putative_enhancer	enhancer	1	1
chrI:5015590-5016056	unassigned_promoter	promoter	2	2	2
chrI:5019984-5020484	coding_promoter	promoter	1	1	1
chrI:5023445-5023907	no_annotation	other	1	1	1
chrI:5025029-5025414	coding_promoter	promoter	2	2	1
chrI:5025414-5025799	putative_enhancer	enhancer	1	1	1
chrI:5027898-5028218	coding_promoter	promoter	2	2
chrI:5030937-5031437	putative_enhancer	enhancer	6	6	3
chrI:5032824-5033255	putative_enhancer	enhancer	1	1
chrI:5033255-5033687	putative_enhancer	enhancer	3	3	1
chrI:5035506-5036006	coding_promoter	promoter	4	3	1
chrI:5037271-5037676	putative_enhancer	enhancer	3	3	1
chrI:5049762-5050262	coding_promoter	promoter	2	2	2
chrI:5057297-5057772	coding_promoter	promoter	2	2	2
chrI:5072128-5072628	putative_enhancer	enhancer	1	1
chrI:5083061-5083561	coding_promoter	promoter	1	1	1
chrI:5084575-5085075	coding_promoter	promoter	1	1
chrI:5086246-5086746	putative_enhancer	enhancer	1	1	1
chrI:5105930-5106430	coding_promoter	promoter	1	1	1
chrI:511051-511498	putative_enhancer	enhancer	1	1	1
chrI:5127390-5127890	coding_promoter	promoter	2	2	2
chrI:5130638-5131053	putative_enhancer	enhancer	1	1	1
chrI:5131053-5131375	coding_promoter	promoter	2	2	2
chrI:5131375-5131770	coding_promoter	promoter	2	2	2
chrI:5134470-5134910	coding_promoter	promoter	2	2	2
chrI:5140204-5140704	coding_promoter	promoter	1	1	1
chrI:516604-517041	coding_promoter	promoter	12	12	8
chrI:518017-518444	coding_promoter	promoter	7	7	6
chrI:518444-518871	coding_promoter	promoter	13	12	10
chrI:524494-524902	unassigned_promoter	promoter	5	5	3
chrI:5261498-5261998	unassigned_promoter	promoter	1	1	1
chrI:5272441-5272941	coding_promoter	promoter	2	2	1
chrI:527479-527852	putative_enhancer	enhancer	1	1	1
chrI:527852-528340	putative_enhancer	enhancer	4	4	4
chrI:5287162-5287662	putative_enhancer	enhancer	4	4	2
chrI:5289590-5290090	putative_enhancer	enhancer	1	1
chrI:5290620-5291120	coding_promoter	promoter	2	2	1
chrI:529084-529483	coding_promoter	promoter	1	1
chrI:5294374-5294874	putative_enhancer	enhancer	6	5	3
chrI:529483-529809	coding_promoter	promoter	1	1
chrI:5296308-5296799	putative_enhancer	enhancer	2	2	1
chrI:530136-530413	coding_promoter	promoter	1	1
chrI:5307421-5307820	coding_promoter	promoter	4	4	2
chrI:5308066-5308486	coding_promoter	promoter	11	10	4
chrI:5309563-5310063	putative_enhancer	enhancer	1	1	1
chrI:5310935-5311435	putative_enhancer	enhancer	1	1	1
chrI:5311564-5312064	putative_enhancer	enhancer	13	11	5
chrI:5312690-5313070	putative_enhancer	enhancer	10	9	3
chrI:5313070-5313450	putative_enhancer	enhancer	10	10	6
chrI:5313465-5313965	no_annotation	other	4	4	1
chrI:5314513-5315013	putative_enhancer	enhancer	7	6	2
chrI:5315933-5316393	putative_enhancer	enhancer	6	5	1
chrI:5316393-5316854	coding_promoter	promoter	19	19	12
chrI:5316900-5317400	no_annotation	other	3	3
chrI:5319223-5319723	coding_promoter	promoter	3	3	1
chrI:5322186-5322656	coding_promoter	promoter	2	2	2
chrI:5322656-5323127	no_activity	other	1	1	1
chrI:5345113-5345530	coding_promoter	promoter	13	12	9
chrI:535203-535703	coding_promoter	promoter	2	2	2
chrI:5353708-5354086	coding_promoter	promoter	1	1	1
chrI:5354086-5354465	coding_promoter	promoter	1	1	1
chrI:5357411-5357838	coding_promoter	promoter	1	1	1
chrI:5357956-5358456	coding_promoter	promoter	3	3	2
chrI:536663-537114	coding_promoter	promoter	7	7	6
chrI:537114-537603	putative_enhancer	enhancer	1	1	1
chrI:5375324-5375783	putative_enhancer	enhancer	2	2	2
chrI:5377424-5377924	coding_promoter	promoter	2	2	1
chrI:5379665-5380079	coding_promoter	promoter	2	2	1
chrI:5383986-5384446	unassigned_promoter	promoter	1	1
chrI:5385597-5386097	putative_enhancer	enhancer	2	2	1
chrI:5388333-5388833	putative_enhancer	enhancer	3	3	1
chrI:5388885-5389385	coding_promoter	promoter	2	2	1
chrI:5394641-5395141	coding_promoter	promoter	1	1	1
chrI:5400268-5400768	coding_promoter	promoter	1	1	1
chrI:5408305-5408805	putative_enhancer	enhancer	2	2	1
chrI:5410052-5410552	putative_enhancer	enhancer	1	1	1
chrI:5412384-5412884	coding_promoter	promoter	1	1	1
chrI:5416131-5416631	coding_promoter	promoter	4	4	2
chrI:5420288-5420788	putative_enhancer	enhancer	4	4	4
chrI:5422115-5422615	coding_promoter	promoter	3	3	1
chrI:5429698-5430184	coding_promoter	promoter	4	4	2
chrI:5431241-5431674	putative_enhancer	enhancer	1	1	1
chrI:545511-546011	coding_promoter	promoter	7	7	6
chrI:547918-548327	putative_enhancer	enhancer	2	2	2
chrI:5485756-5486178	coding_promoter	promoter	2	2	2
chrI:549150-549650	putative_enhancer	enhancer	1	1	1
chrI:5494010-5494510	coding_promoter	promoter	1
chrI:5500596-5501070	putative_enhancer	enhancer	1	1	1
chrI:5502370-5502870	no_activity	other	1	1	1
chrI:5518640-5519112	coding_promoter	promoter	3	3	2
chrI:5519553-5520021	putative_enhancer	enhancer	1	1	1
chrI:5540565-5541065	unassigned_promoter	promoter	1	1	1
chrI:5543812-5544312	coding_promoter	promoter	1	1	1
chrI:5545473-5545973	coding_promoter	promoter	8	8	7
chrI:5550283-5550783	coding_promoter	promoter	1	1	1
chrI:557114-557614	coding_promoter	promoter	1	1
chrI:5586964-5587464	putative_enhancer	enhancer	1	1
chrI:5589396-5589896	coding_promoter	promoter	2	2	1
chrI:5599350-5599850	putative_enhancer	enhancer	2	2	1
chrI:5610454-5610954	unassigned_promoter	promoter	1	1	1
chrI:5618284-5618784	coding_promoter	promoter	5	5	4
chrI:5626354-5626692	coding_promoter	promoter	1	1	1
chrI:5653453-5653953	coding_promoter	promoter	1	1	1
chrI:5673603-5674018	coding_promoter	promoter	1	1	1
chrI:5677870-5678370	coding_promoter	promoter	1	1	1
chrI:5690079-5690579	putative_enhancer	enhancer	1	1	1
chrI:5691501-5692001	coding_promoter	promoter	4	4	3
chrI:5697427-5697927	coding_promoter	promoter	3	3	3
chrI:5698903-5699403	coding_promoter	promoter	4	4	3
chrI:5706749-5707249	non-coding_RNA	promoter	1	1	1
chrI:5746362-5746862	coding_promoter	promoter	3	2	1
chrI:5747420-5747879	putative_enhancer	enhancer	2	2	2
chrI:5747879-5748338	no_activity	other	2	2	2
chrI:5768639-5769139	coding_promoter	promoter	8	7	3
chrI:5769865-5770365	putative_enhancer	enhancer	1	1	1
chrI:5775716-5776216	coding_promoter	promoter	2	2	1
chrI:5777186-5777686	putative_enhancer	enhancer	1	1	1
chrI:5808203-5808703	putative_enhancer	enhancer	1	1	1
chrI:5809922-5810422	coding_promoter	promoter	2	2
chrI:5811246-5811746	putative_enhancer	enhancer	1	1	1
chrI:5828769-5829269	putative_enhancer	enhancer	1	1	1
chrI:5856474-5856964	putative_enhancer	enhancer	1	1	1
chrI:5856964-5857454	putative_enhancer	enhancer	1	1
chrI:5865819-5866258	putative_enhancer	enhancer	5	5	4
chrI:5870504-5871004	coding_promoter	promoter	8	8	5
chrI:5879369-5879869	putative_enhancer	enhancer	4	4	3
chrI:5879869-5880362	no_annotation	other	1	1
chrI:5880855-5881355	coding_promoter	promoter	2	2	1
chrI:5882003-5882503	coding_promoter	promoter	5	5	3
chrI:5883748-5884248	putative_enhancer	enhancer	4	3	2
chrI:5888253-5888753	coding_promoter	promoter	2	2	1
chrI:5904182-5904571	coding_promoter	promoter	1	1	1
chrI:5905340-5905785	putative_enhancer	enhancer	1	1	1
chrI:5936881-5937381	coding_promoter	promoter	1	1	1
chrI:5986243-5986624	coding_promoter	promoter	1	1	1
chrI:5997357-5997857	putative_enhancer	enhancer	3	3	2
chrI:5999083-5999583	coding_promoter	promoter	8	8	6
chrI:6000181-6000681	putative_enhancer	enhancer	1	1
chrI:6000943-6001443	coding_promoter	promoter	1	1
chrI:6034439-6034939	coding_promoter	promoter	3	3	3
chrI:6060898-6061398	coding_promoter	promoter	3	3	2
chrI:6073413-6073913	putative_enhancer	enhancer	7	7	4
chrI:6076211-6076650	putative_enhancer	enhancer	2	2	1
chrI:6076650-6077090	putative_enhancer	enhancer	1	1	1
chrI:6077120-6077620	putative_enhancer	enhancer	4	4	4
chrI:6079525-6080025	putative_enhancer	enhancer	3	3	2
chrI:6080523-6080847	coding_promoter	promoter	2	2	1
chrI:6081246-6081720	coding_promoter	promoter	5	5	1
chrI:6082602-6083102	non-coding_RNA	promoter	1	1
chrI:608729-609229	coding_promoter	promoter	1	1
chrI:6091489-6091963	coding_promoter	promoter	11	11	7
chrI:6091963-6092438	putative_enhancer	enhancer	2	2	1
chrI:6092542-6093042	coding_promoter	promoter	3	3	1
chrI:6105527-6106027	non-coding_RNA	promoter	3	3	3
chrI:611527-612027	putative_enhancer	enhancer	2	2	1
chrI:6117980-6118480	coding_promoter	promoter	10	10	5
chrI:6119503-6119945	unassigned_promoter	promoter	1	1	1
chrI:6120515-6120833	putative_enhancer	enhancer	1	1	1
chrI:6122717-6123217	coding_promoter	promoter	1	1	1
chrI:6153492-6153992	coding_promoter	promoter	4	4
chrI:6163961-6164337	non-coding_RNA	promoter	1	1	1
chrI:6166572-6167021	coding_promoter	promoter	1	1	1
chrI:6170858-6171358	putative_enhancer	enhancer	1	1
chrI:6171460-6171960	putative_enhancer	enhancer	1	1	1
chrI:6173176-6173559	coding_promoter	promoter	1	1	1
chrI:6175026-6175526	coding_promoter	promoter	3	3	2
chrI:617847-618347	coding_promoter	promoter	1	1	1
chrI:6183694-6184194	coding_promoter	promoter	1	1	1
chrI:6200164-6200552	unassigned_promoter	promoter	1	1
chrI:6203657-6204157	putative_enhancer	enhancer	2	2	1
chrI:6210717-6211217	putative_enhancer	enhancer	7	7	5
chrI:6212635-6213135	non-coding_RNA	promoter	4	4	3
chrI:6215332-6215832	coding_promoter	promoter	3	3	1
chrI:6220780-6221255	coding_promoter	promoter	3	3	1
chrI:6238311-6238811	putative_enhancer	enhancer	1	1
chrI:6263335-6263835	putative_enhancer	enhancer	1	1	1
chrI:6283349-6283845	coding_promoter	promoter	1	1	1
chrI:6314681-6315181	coding_promoter	promoter	1	1	1
chrI:6317661-6318142	unassigned_promoter	promoter	4	4	4
chrI:6338487-6338987	putative_enhancer	enhancer	2	2
chrI:6340006-6340506	putative_enhancer	enhancer	1	1
chrI:6364695-6365162	coding_promoter	promoter	3	3	1
chrI:636588-637088	coding_promoter	promoter	1	1
chrI:6366098-6366598	coding_promoter	promoter	2	2	2
chrI:6366642-6367142	putative_enhancer	enhancer	3	3	1
chrI:6372683-6373145	putative_enhancer	enhancer	1	1
chrI:6373677-6374177	coding_promoter	promoter	1	1	1
chrI:6374287-6374754	putative_enhancer	enhancer	1	1	1
chrI:6378927-6379427	coding_promoter	promoter	8	8	5
chrI:638243-638649	putative_enhancer	enhancer	2	2	2
chrI:6389541-6390041	putative_enhancer	enhancer	5	5	3
chrI:6397987-6398487	putative_enhancer	enhancer	1	1	1
chrI:639942-640442	coding_promoter	promoter	1	1
chrI:6412556-6412975	non-coding_RNA	promoter	4	4	3
chrI:6416726-6417226	coding_promoter	promoter	5	5	1
chrI:6418616-6419116	putative_enhancer	enhancer	4	4	1
chrI:6421711-6422211	coding_promoter	promoter	2	2	1
chrI:6459412-6459912	coding_promoter	promoter	7	7	4
chrI:6465843-6466275	coding_promoter	promoter	1	1	1
chrI:6496418-6496918	coding_promoter	promoter	1	1
chrI:6497158-6497658	coding_promoter	promoter	3	3	1
chrI:6498103-6498603	putative_enhancer	enhancer	2	2	1
chrI:6498643-6499119	coding_promoter	promoter	1	1	1
chrI:6499119-6499518	putative_enhancer	enhancer	1	1	1
chrI:6499518-6499941	putative_enhancer	enhancer	2	2	1
chrI:6554441-6554941	coding_promoter	promoter	4	4	4
chrI:6556064-6556564	coding_promoter	promoter	1	1	1
chrI:65576-66076	putative_enhancer	enhancer	1	1	1
chrI:6569282-6569782	unassigned_promoter	promoter	2	2	1
chrI:6572547-6573047	putative_enhancer	enhancer	3	3	2
chrI:6574580-6575080	putative_enhancer	enhancer	1	1	1
chrI:6577051-6577551	coding_promoter	promoter	5	5	1
chrI:6577670-6578170	putative_enhancer	enhancer	1	1
chrI:6578204-6578704	putative_enhancer	enhancer	5	4	3
chrI:6579699-6580199	coding_promoter	promoter	5	5	3
chrI:6581173-6581662	putative_enhancer	enhancer	2	2	2
chrI:6581662-6582138	unassigned_promoter	promoter	1	1
chrI:6582576-6583027	non-coding_RNA	promoter	2	2	2
chrI:6584656-6585156	no_annotation	other	1	1
chrI:6589089-6589589	putative_enhancer	enhancer	1	1
chrI:6591725-6592225	coding_promoter	promoter	1	1	1
chrI:6608126-6608538	unassigned_promoter	promoter	2	2	2
chrI:6611155-6611590	coding_promoter	promoter	7	7	6
chrI:6615791-6616291	coding_promoter	promoter	2	2	2
chrI:6624760-6625260	coding_promoter	promoter	1	1	1
chrI:6676926-6677426	coding_promoter	promoter	2	2	2
chrI:6727646-6728013	putative_enhancer	enhancer	1	1
chrI:6732375-6732837	putative_enhancer	enhancer	1	1
chrI:6733318-6733818	coding_promoter	promoter	1	1	1
chrI:6745296-6745796	coding_promoter	promoter	9	9	7
chrI:6756301-6756801	coding_promoter	promoter	1	1	1
chrI:6757008-6757508	coding_promoter	promoter	3	3	2
chrI:6769944-6770444	putative_enhancer	enhancer	1	1	1
chrI:6780037-6780482	coding_promoter	promoter	5	5	3
chrI:6781503-6782003	non-coding_RNA	promoter	5	5	4
chrI:6789877-6790320	coding_promoter	promoter	2	2	1
chrI:679879-680379	coding_promoter	promoter	1	1
chrI:6799427-6799927	coding_promoter	promoter	1	1	1
chrI:6810268-6810768	coding_promoter	promoter	1	1	1
chrI:6835227-6835671	coding_promoter	promoter	7	7	2
chrI:6836336-6836779	putative_enhancer	enhancer	2	2	1
chrI:6836779-6837183	putative_enhancer	enhancer	2	2	1
chrI:6837183-6837568	putative_enhancer	enhancer	1	1	1
chrI:6837568-6837991	putative_enhancer	enhancer	1	1	1
chrI:6838046-6838546	putative_enhancer	enhancer	5	5	2
chrI:6881930-6882371	coding_promoter	promoter	2	2
chrI:6883292-6883781	putative_enhancer	enhancer	1	1	1
chrI:6885058-6885557	unassigned_promoter	promoter	3	3	2
chrI:6886466-6886920	putative_enhancer	enhancer	1	1	1
chrI:6893043-6893509	putative_enhancer	enhancer	1	1	1
chrI:6942774-6943274	unassigned_promoter	promoter	1	1	1
chrI:6945532-6946032	unassigned_promoter	promoter	4	4	3
chrI:6949305-6949805	coding_promoter	promoter	1	1	1
chrI:6951016-6951512	putative_enhancer	enhancer	1	1	1
chrI:6963136-6963636	putative_enhancer	enhancer	1	1	1
chrI:6964331-6964778	coding_promoter	promoter	2	2	1
chrI:6970021-6970521	coding_promoter	promoter	1	1	1
chrI:6974184-6974684	coding_promoter	promoter	1	1	1
chrI:69869-70369	coding_promoter	promoter	25	24	15
chrI:6996810-6997310	putative_enhancer	enhancer	1	1	1
chrI:6999424-6999924	coding_promoter	promoter	1	1	1
chrI:7005351-7005851	coding_promoter	promoter	3	3	1
chrI:7021234-7021672	coding_promoter	promoter	3	3	3
chrI:7054549-7055049	coding_promoter	promoter	4	4	3
chrI:7055906-7056308	putative_enhancer	enhancer	1	1	1
chrI:7056804-7057304	coding_promoter	promoter	3	3	2
chrI:7058597-7059097	putative_enhancer	enhancer	1	1	1
chrI:7059131-7059631	unassigned_promoter	promoter	3	3	3
chrI:7079465-7079945	putative_enhancer	enhancer	2	2	2
chrI:7080757-7081257	coding_promoter	promoter	1	1	1
chrI:7081296-7081796	coding_promoter	promoter	3	3	2
chrI:7082079-7082579	coding_promoter	promoter	4	4	3
chrI:7082818-7083318	coding_promoter	promoter	5	5	4
chrI:7083403-7083903	putative_enhancer	enhancer	2	2	2
chrI:7084325-7084825	coding_promoter	promoter	5	5	4
chrI:7085688-7086188	putative_enhancer	enhancer	1	1	1
chrI:7090149-7090649	coding_promoter	promoter	1	1	1
chrI:7094948-7095448	coding_promoter	promoter	1	1	1
chrI:7116570-7117070	coding_promoter	promoter	3	3	2
chrI:7125509-7126009	putative_enhancer	enhancer	1	1	1
chrI:7126505-7127005	putative_enhancer	enhancer	1	1	1
chrI:7128112-7128612	coding_promoter	promoter	13	13	11
chrI:7147568-7148063	coding_promoter	promoter	2	2	2
chrI:7149448-7149948	coding_promoter	promoter	13	13	13
chrI:7156694-7157194	coding_promoter	promoter	4	4	3
chrI:7158613-7159106	coding_promoter	promoter	2	2	2
chrI:7159106-7159599	coding_promoter	promoter	2	2	2
chrI:716575-717028	coding_promoter	promoter	12	11	9
chrI:7174048-7174425	coding_promoter	promoter	1	1	1
chrI:7175144-7175534	unassigned_promoter	promoter	1	1	1
chrI:7176614-7177114	coding_promoter	promoter	3	3	3
chrI:7194720-7195220	coding_promoter	promoter	2	2	2
chrI:719829-720172	coding_promoter	promoter	1	1	1
chrI:7211863-7212363	putative_enhancer	enhancer	3	3	1
chrI:7213251-7213688	putative_enhancer	enhancer	1	1
chrI:7213688-7214126	putative_enhancer	enhancer	1	1
chrI:7214650-7215129	coding_promoter	promoter	2	2
chrI:7217183-7217683	putative_enhancer	enhancer	4	4	2
chrI:7227612-7228112	coding_promoter	promoter	3	3	3
chrI:7242218-7242718	no_annotation	other	1	1	1
chrI:7243681-7244181	coding_promoter	promoter	1
chrI:7251373-7251873	coding_promoter	promoter	1	1	1
chrI:7279198-7279698	non-coding_RNA	promoter	2	2	2
chrI:7283654-7284098	coding_promoter	promoter	1	1
chrI:7287695-7288132	coding_promoter	promoter	1	1	1
chrI:7289428-7289928	coding_promoter	promoter	1	1	1
chrI:7302910-7303410	coding_promoter	promoter	2	2	1
chrI:7304609-7305109	coding_promoter	promoter	1	1	1
chrI:7314298-7314747	coding_promoter	promoter	2	2	2
chrI:7321406-7321906	coding_promoter	promoter	3	3	3
chrI:7346593-7347093	coding_promoter	promoter	1	1	1
chrI:7348495-7348995	coding_promoter	promoter	2	2	2
chrI:7354086-7354586	coding_promoter	promoter	2	2	1
chrI:7355665-7356165	putative_enhancer	enhancer	1	1	1
chrI:7380855-7381355	unassigned_promoter	promoter	2	2	1
chrI:7383053-7383553	coding_promoter	promoter	1	1	1
chrI:7385115-7385615	putative_enhancer	enhancer	1	1	1
chrI:7421213-7421713	unassigned_promoter	promoter	1	1
chrI:74531-75031	putative_enhancer	enhancer	2	2	2
chrI:745320-745820	coding_promoter	promoter	2	2	2
chrI:7466483-7466907	coding_promoter	promoter	2	2	2
chrI:7472227-7472727	unassigned_promoter	promoter	4	3	3
chrI:7474447-7474947	no_annotation	other	2	2	2
chrI:7474981-7475475	coding_promoter	promoter	17	17	16
chrI:7475475-7475970	putative_enhancer	enhancer	6	6	5
chrI:7476869-7477222	coding_promoter	promoter	4	4	3
chrI:7478305-7478805	putative_enhancer	enhancer	1	1
chrI:7479171-7479671	coding_promoter	promoter	6	5	4
chrI:7480008-7480508	unassigned_promoter	promoter	2	2	2
chrI:7489485-7489968	coding_promoter	promoter	1	1	1
chrI:7490034-7490534	coding_promoter	promoter	6	6	4
chrI:7491835-7492335	coding_promoter	promoter	8	8	7
chrI:7492867-7493277	putative_enhancer	enhancer	2	2	2
chrI:7494041-7494518	putative_enhancer	enhancer	2	2	2
chrI:7494518-7494970	coding_promoter	promoter	3	3	3
chrI:7500280-7500780	coding_promoter	promoter	25	25	18
chrI:7514837-7515337	coding_promoter	promoter	2	2	2
chrI:7515740-7516240	coding_promoter	promoter	2	2	1
chrI:7518056-7518497	putative_enhancer	enhancer	3	3	3
chrI:7518497-7518939	coding_promoter	promoter	10	10	8
chrI:7528478-7528978	no_annotation	other	1	1	1
chrI:7542077-7542577	coding_promoter	promoter	5	5	4
chrI:7543340-7543840	putative_enhancer	enhancer	7	7	6
chrI:7544475-7544898	putative_enhancer	enhancer	2	2	1
chrI:754455-754939	non-coding_RNA	promoter	2	2	2
chrI:7548575-7548951	putative_enhancer	enhancer	1	1	1
chrI:7550179-7550679	coding_promoter	promoter	4	3	1
chrI:7559425-7559925	coding_promoter	promoter	1	1	1
chrI:7562158-7562658	putative_enhancer	enhancer	1	1
chrI:7563014-7563514	coding_promoter	promoter	21	21	18
chrI:7563764-7564264	putative_enhancer	enhancer	4	4	3
chrI:756784-757284	coding_promoter	promoter	6	6	3
chrI:7571017-7571508	coding_promoter	promoter	5	5	4
chrI:7573749-7574249	coding_promoter	promoter	9	9	7
chrI:7575248-7575748	putative_enhancer	enhancer	8	8	6
chrI:7581729-7582178	coding_promoter	promoter	6	6	5
chrI:7590374-7590874	coding_promoter	promoter	1	1
chrI:7595363-7595863	coding_promoter	promoter	17	17	14
chrI:7596744-7597154	coding_promoter	promoter	2	2	2
chrI:7608191-7608691	coding_promoter	promoter	3	3	2
chrI:7609395-7609895	putative_enhancer	enhancer	2	2	1
chrI:7611688-7612188	coding_promoter	promoter	3	3	3
chrI:7612858-7613309	coding_promoter	promoter	1	1	1
chrI:763278-763778	coding_promoter	promoter	9	8	6
chrI:7657314-7657726	no_activity	other	1	1	1
chrI:7658183-7658621	coding_promoter	promoter	5	5	1
chrI:7658621-7659107	putative_enhancer	enhancer	5	5	4
chrI:7659107-7659600	coding_promoter	promoter	5	4	2
chrI:7660856-7661257	putative_enhancer	enhancer	2	2	2
chrI:7661257-7661659	putative_enhancer	enhancer	3	3	3
chrI:7661989-7662489	coding_promoter	promoter	7	7	6
chrI:7678961-7679460	coding_promoter	promoter	1	1	1
chrI:7689348-7689848	coding_promoter	promoter	2	2	1
chrI:7712562-7712983	coding_promoter	promoter	3	3	3
chrI:7724526-7725026	coding_promoter	promoter	1	1	1
chrI:7757981-7758481	unassigned_promoter	promoter	1	1	1
chrI:7762350-7762850	unassigned_promoter	promoter	1	1	1
chrI:7835547-7835922	coding_promoter	promoter	1	1	1
chrI:7848687-7849106	coding_promoter	promoter	2	2	2
chrI:7860045-7860422	non-coding_RNA	promoter	1	1	1
chrI:7860422-7860745	putative_enhancer	enhancer	1	1	1
chrI:7861385-7861885	coding_promoter	promoter	10	10	6
chrI:7861966-7862466	coding_promoter	promoter	1	1	1
chrI:7865992-7866477	coding_promoter	promoter	8	8	7
chrI:7866940-7867418	putative_enhancer	enhancer	1	1	1
chrI:7867645-7868145	putative_enhancer	enhancer	1	1	1
chrI:7871549-7872010	putative_enhancer	enhancer	1	1	1
chrI:7883669-7884169	coding_promoter	promoter	2	2	2
chrI:7889102-7889602	coding_promoter	promoter	3	3	3
chrI:7890560-7891060	unassigned_promoter	promoter	2	2	2
chrI:7935961-7936345	coding_promoter	promoter	2	2	1
chrI:7942511-7943011	coding_promoter	promoter	4	4	3
chrI:7948089-7948589	putative_enhancer	enhancer	3	3	3
chrI:7951607-7952054	coding_promoter	promoter	3	3	2
chrI:7952286-7952786	coding_promoter	promoter	2	2	2
chrI:7954745-7955245	coding_promoter	promoter	4	4	3
chrI:7961669-7962169	coding_promoter	promoter	1	1	1
chrI:7968730-7969198	coding_promoter	promoter	5	5	3
chrI:8009607-8010107	coding_promoter	promoter	3	3
chrI:8010245-8010745	coding_promoter	promoter	4	4	1
chrI:8011290-8011790	putative_enhancer	enhancer	5	5	3
chrI:8013241-8013741	putative_enhancer	enhancer	1	1
chrI:8018907-8019407	putative_enhancer	enhancer	9	9	7
chrI:8024478-8024978	coding_promoter	promoter	1	1
chrI:8028649-8029149	coding_promoter	promoter	1	1	1
chrI:8045882-8046382	putative_enhancer	enhancer	1	1	1
chrI:8057599-8058099	putative_enhancer	enhancer	2	2	1
chrI:8058240-8058740	coding_promoter	promoter	1	1
chrI:8083223-8083721	coding_promoter	promoter	3	3	2
chrI:8100019-8100519	coding_promoter	promoter	8	8	4
chrI:8101595-8102095	putative_enhancer	enhancer	5	5	4
chrI:8102885-8103385	putative_enhancer	enhancer	4	4	3
chrI:8123608-8124108	putative_enhancer	enhancer	2	2	2
chrI:8124373-8124825	coding_promoter	promoter	10	10	6
chrI:8133562-8134062	coding_promoter	promoter	11	11	7
chrI:8135544-8135976	non-coding_RNA	promoter	4	4	4
chrI:819912-820412	putative_enhancer	enhancer	2	2	2
chrI:8218295-8218795	coding_promoter	promoter	1	1
chrI:8222911-8223411	coding_promoter	promoter	2	2	1
chrI:8224176-8224676	non-coding_RNA	promoter	4	4	4
chrI:8245384-8245884	coding_promoter	promoter	2	2	1
chrI:826161-826661	putative_enhancer	enhancer	2	2	2
chrI:8293796-8294296	coding_promoter	promoter	1	1	1
chrI:8301952-8302452	putative_enhancer	enhancer	1	1	1
chrI:8304420-8304920	unassigned_promoter	promoter	1	1
chrI:8305251-8305751	unassigned_promoter	promoter	3	3	3
chrI:8307494-8307994	coding_promoter	promoter	1	1	1
chrI:8326939-8327439	coding_promoter	promoter	1	1	1
chrI:8329545-8329946	coding_promoter	promoter	2	2	1
chrI:8344372-8344872	unassigned_promoter	promoter	1	1
chrI:8346630-8347130	putative_enhancer	enhancer	1	1	1
chrI:8350932-8351432	unassigned_promoter	promoter	1	1	1
chrI:835952-836452	coding_promoter	promoter	4	4	2
chrI:8406527-8407027	coding_promoter	promoter	1	1	1
chrI:8409665-8410165	coding_promoter	promoter	6	6	6
chrI:8411142-8411642	coding_promoter	promoter	4	4	4
chrI:8411717-8412174	putative_enhancer	enhancer	1	1	1
chrI:8412174-8412507	coding_promoter	promoter	1	1	1
chrI:8412797-8413212	coding_promoter	promoter	2	2	2
chrI:8416080-8416580	coding_promoter	promoter	1	1	1
chrI:8426633-8427133	coding_promoter	promoter	9	9	8
chrI:8449645-8450145	putative_enhancer	enhancer	1	1	1
chrI:8453985-8454485	coding_promoter	promoter	2	2	1
chrI:8458917-8459417	coding_promoter	promoter	1	1	1
chrI:8461142-8461642	unassigned_promoter	promoter	1	1	1
chrI:849136-849636	putative_enhancer	enhancer	4	4	4
chrI:851499-851958	coding_promoter	promoter	2	2	1
chrI:851958-852327	putative_enhancer	enhancer	6	5	4
chrI:852327-852642	coding_promoter	promoter	1	1
chrI:8529392-8529892	unassigned_promoter	promoter	3	3	3
chrI:8563396-8563896	putative_enhancer	enhancer	1	1
chrI:8567838-8568338	putative_enhancer	enhancer	1	1
chrI:8579996-8580496	coding_promoter	promoter	1	1	1
chrI:8582566-8583034	coding_promoter	promoter	1	1	1
chrI:8590453-8590953	coding_promoter	promoter	4	4	4
chrI:8600801-8601247	coding_promoter	promoter	1	1	1
chrI:8608628-8609128	coding_promoter	promoter	3	3	3
chrI:8614761-8615261	coding_promoter	promoter	3	3	3
chrI:86189-86689	coding_promoter	promoter	1	1	1
chrI:8680148-8680541	putative_enhancer	enhancer	1	1	1
chrI:8680541-8681003	putative_enhancer	enhancer	1	1	1
chrI:8682157-8682657	coding_promoter	promoter	2	2
chrI:8728373-8728873	coding_promoter	promoter	5	5	5
chrI:8747826-8748326	coding_promoter	promoter	10	10	10
chrI:8759586-8760051	coding_promoter	promoter	2	2	2
chrI:8760433-8760849	putative_enhancer	enhancer	1	1	1
chrI:8761821-8762229	putative_enhancer	enhancer	2	2	2
chrI:8762640-8762988	coding_promoter	promoter	1	1	1
chrI:8783564-8784003	putative_enhancer	enhancer	2	2	2
chrI:8786665-8787165	coding_promoter	promoter	13	13	10
chrI:8787165-8787623	no_annotation	other	1	1	1
chrI:8792231-8792713	coding_promoter	promoter	5	4	3
chrI:879688-880121	coding_promoter	promoter	3	2	2
chrI:8797530-8798030	coding_promoter	promoter	1	1	1
chrI:8807886-8808279	coding_promoter	promoter	4	4	4
chrI:881309-881732	coding_promoter	promoter	5	4	3
chrI:8813198-8813640	coding_promoter	promoter	6	6	5
chrI:8816318-8816818	coding_promoter	promoter	1	1	1
chrI:882578-883078	coding_promoter	promoter	30	30	23
chrI:883131-883631	no_annotation	other	4	4	3
chrI:8839005-8839505	coding_promoter	promoter	4	4	4
chrI:884293-884672	putative_enhancer	enhancer	1	1	1
chrI:8852504-8852914	coding_promoter	promoter	1	1	1
chrI:8863973-8864473	unassigned_promoter	promoter	2	2	2
chrI:8865412-8865912	coding_promoter	promoter	4	4	3
chrI:8867422-8867922	putative_enhancer	enhancer	2	2	2
chrI:8875963-8876463	coding_promoter	promoter	3	3	2
chrI:8905324-8905824	coding_promoter	promoter	1	1
chrI:8916922-8917422	putative_enhancer	enhancer	1	1	1
chrI:895827-896327	coding_promoter	promoter	1	1	1
chrI:8975413-8975879	putative_enhancer	enhancer	1	1	1
chrI:8983787-8984287	putative_enhancer	enhancer	1	1	1
chrI:8986941-8987409	coding_promoter	promoter	2	2	1
chrI:8988609-8989109	coding_promoter	promoter	1	1	1
chrI:9013976-9014476	coding_promoter	promoter	1	1	1
chrI:9042650-9043150	coding_promoter	promoter	3	3	2
chrI:9046939-9047439	coding_promoter	promoter	1	1	1
chrI:9051090-9051590	non-coding_RNA	promoter	1	1	1
chrI:9055254-9055754	coding_promoter	promoter	4	4	3
chrI:9057769-9058269	coding_promoter	promoter	12	12	9
chrI:9064565-9065065	coding_promoter	promoter	2	2	1
chrI:9076103-9076603	putative_enhancer	enhancer	7	7	6
chrI:9077207-9077707	coding_promoter	promoter	6	6	4
chrI:9079903-9080403	coding_promoter	promoter	2	2	2
chrI:9082995-9083495	unassigned_promoter	promoter	3	3	2
chrI:9092170-9092670	coding_promoter	promoter	2	2	2
chrI:9095628-9096010	coding_promoter	promoter	2	2	2
chrI:9097510-9098010	unassigned_promoter	promoter	11	11	8
chrI:9110696-9111196	coding_promoter	promoter	3	3	2
chrI:9112953-9113453	coding_promoter	promoter	8	8	7
chrI:9113831-9114331	putative_enhancer	enhancer	3	3	1
chrI:9115488-9115980	putative_enhancer	enhancer	2	2	1
chrI:9115980-9116479	putative_enhancer	enhancer	1	1
chrI:9128687-9129187	coding_promoter	promoter	6	6	3
chrI:9130497-9130920	putative_enhancer	enhancer	1	1	1
chrI:9131769-9132232	putative_enhancer	enhancer	5	5	4
chrI:9145387-9145867	putative_enhancer	enhancer	2	2
chrI:9167214-9167623	coding_promoter	promoter	2	2	1
chrI:9168465-9168965	putative_enhancer	enhancer	8	8	6
chrI:9188820-9189320	coding_promoter	promoter	1	1	1
chrI:9199109-9199609	coding_promoter	promoter	1	1	1
chrI:9244451-9244951	putative_enhancer	enhancer	1	1	1
chrI:9248638-9249138	unassigned_promoter	promoter	1	1	1
chrI:9266841-9267341	non-coding_RNA	promoter	1	1
chrI:9268770-9269270	non-coding_RNA	promoter	1	1
chrI:9275144-9275644	unassigned_promoter	promoter	3	3	1
chrI:9276254-9276606	putative_enhancer	enhancer	1	1	1
chrI:9286493-9286993	coding_promoter	promoter	1	1	1
chrI:9288578-9289078	no_annotation	other	1	1	1
chrI:9297685-9298185	coding_promoter	promoter	1
chrI:9298359-9298859	putative_enhancer	enhancer	2	2	2
chrI:9307512-9307876	coding_promoter	promoter	3	3	3
chrI:9315352-9315852	coding_promoter	promoter	7	7	4
chrI:9316840-9317340	coding_promoter	promoter	2	2	2
chrI:9327314-9327732	coding_promoter	promoter	2	2
chrI:9327732-9328150	putative_enhancer	enhancer	1	1	1
chrI:9330674-9331174	putative_enhancer	enhancer	2	2	1
chrI:9331220-9331625	unassigned_promoter	promoter	3	3	1
chrI:9331625-9332031	putative_enhancer	enhancer	1	1	1
chrI:9332472-9332972	non-coding_RNA	promoter	6	6	3
chrI:9333863-9334363	putative_enhancer	enhancer	2	2	2
chrI:9334377-9334877	putative_enhancer	enhancer	1	1
chrI:9343678-9344178	coding_promoter	promoter	32	31	20
chrI:934942-935442	coding_promoter	promoter	2	2	1
chrI:936458-936958	coding_promoter	promoter	1	1	1
chrI:9372917-9373319	unassigned_promoter	promoter	8	8	6
chrI:9373319-9373722	putative_enhancer	enhancer	3	3	2
chrI:9374556-9375056	unassigned_promoter	promoter	4	4	3
chrI:9375128-9375628	putative_enhancer	enhancer	1	1	1
chrI:9378292-9378792	unassigned_promoter	promoter	2	1	1
chrI:9379119-9379619	putative_enhancer	enhancer	2	1	1
chrI:9380113-9380613	unassigned_promoter	promoter	5	4	3
chrI:9380674-9381174	no_annotation	other	3	3	1
chrI:9381236-9381736	unassigned_promoter	promoter	19	19	11
chrI:9381736-9382196	no_annotation	other	4	4	3
chrI:9382657-9383066	putative_enhancer	enhancer	4	4	2
chrI:9383066-9383475	unassigned_promoter	promoter	2	1	1
chrI:9383622-9384122	putative_enhancer	enhancer	10	8	5
chrI:9385826-9386326	putative_enhancer	enhancer	4	4	3
chrI:9405204-9405704	coding_promoter	promoter	1	1	1
chrI:9414175-9414675	coding_promoter	promoter	1	1	1
chrI:9422154-9422607	coding_promoter	promoter	1	1	1
chrI:9424474-9424931	putative_enhancer	enhancer	3	3	2
chrI:9424931-9425388	putative_enhancer	enhancer	1	1
chrI:9428619-9429119	putative_enhancer	enhancer	3	3	2
chrI:9429283-9429783	putative_enhancer	enhancer	1	1
chrI:9430481-9430981	putative_enhancer	enhancer	8	8	4
chrI:9445684-9446146	putative_enhancer	enhancer	1	1	1
chrI:9447899-9448399	unassigned_promoter	promoter	1	1
chrI:9449184-9449684	putative_enhancer	enhancer	2	2	2
chrI:9449955-9450455	coding_promoter	promoter	3	3	1
chrI:945894-946338	non-coding_RNA	promoter	4	4	3
chrI:9471039-9471539	coding_promoter	promoter	10	10	9
chrI:9474774-9475274	coding_promoter	promoter	1	1
chrI:9488200-9488595	coding_promoter	promoter	1	1	1
chrI:9500719-9501219	coding_promoter	promoter	2	2	2
chrI:9506011-9506403	coding_promoter	promoter	4	4	4
chrI:9512034-9512534	coding_promoter	promoter	1	1	1
chrI:9515903-9516362	coding_promoter	promoter	2	2	2
chrI:9532722-9533222	coding_promoter	promoter	1	1	1
chrI:9540899-9541399	coding_promoter	promoter	1	1	1
chrI:954284-954784	unassigned_promoter	promoter	2	2	2
chrI:9545437-9545819	no_activity	other	1	1
chrI:9550587-9551063	putative_enhancer	enhancer	1
chrI:957262-957762	coding_promoter	promoter	11	11	9
chrI:9605502-9606002	coding_promoter	promoter	4	4	2
chrI:961267-961767	unassigned_promoter	promoter	6	6	4
chrI:9625875-9626321	coding_promoter	promoter	1	1	1
chrI:96348-96848	putative_enhancer	enhancer	1	1	1
chrI:9652816-9653316	coding_promoter	promoter	1	1	1
chrI:9664955-9665455	coding_promoter	promoter	1	1	1
chrI:9670623-9671123	coding_promoter	promoter	1	1	1
chrI:9679105-9679510	coding_promoter	promoter	1	1	1
chrI:9685108-9685608	coding_promoter	promoter	1	1	1
chrI:9688629-9689068	coding_promoter	promoter	2	2	2
chrI:9701692-9702192	unassigned_promoter	promoter	1	1
chrI:9720823-9721323	coding_promoter	promoter	4	4	4
chrI:9721910-9722289	coding_promoter	promoter	5	5	3
chrI:9722289-9722668	coding_promoter	promoter	15	15	7
chrI:9725172-9725672	putative_enhancer	enhancer	5	5	4
chrI:9727641-9728062	putative_enhancer	enhancer	2	2	1
chrI:972968-973468	coding_promoter	promoter	17	16	13
chrI:9731208-9731708	coding_promoter	promoter	6	6	4
chrI:9731762-9732262	putative_enhancer	enhancer	1	1	1
chrI:9732444-9732944	putative_enhancer	enhancer	1	1	1
chrI:9733995-9734495	putative_enhancer	enhancer	5	5	3
chrI:9735411-9735911	putative_enhancer	enhancer	1	1
chrI:9736167-9736564	coding_promoter	promoter	3	3	2
chrI:9737281-9737781	putative_enhancer	enhancer	1	1	1
chrI:9738321-9738821	putative_enhancer	enhancer	3	3	1
chrI:9739367-9739867	putative_enhancer	enhancer	3	3	2
chrI:9748540-9749040	putative_enhancer	enhancer	2	2	2
chrI:9749715-9750215	coding_promoter	promoter	1	1
chrI:9750890-9751277	coding_promoter	promoter	1	1	1
chrI:9752216-9752716	coding_promoter	promoter	7	7	5
chrI:9752984-9753484	putative_enhancer	enhancer	1	1	1
chrI:9773895-9774395	coding_promoter	promoter	1	1	1
chrI:9779915-9780415	coding_promoter	promoter	1	1	1
chrI:978090-978545	coding_promoter	promoter	2	2
chrI:978545-979000	coding_promoter	promoter	3	3
chrI:9787888-9788278	putative_enhancer	enhancer	3	3	3
chrI:9788413-9788879	coding_promoter	promoter	8	8	6
chrI:9790727-9791124	coding_promoter	promoter	2	2	1
chrI:9791124-9791538	unassigned_promoter	promoter	1	1	1
chrI:979372-979872	putative_enhancer	enhancer	5	5	3
chrI:982905-983405	putative_enhancer	enhancer	3	3	2
chrI:9836993-9837493	unassigned_promoter	promoter	2	2	2
chrI:9839167-9839627	coding_promoter	promoter	2	2	2
chrI:9840802-9841302	putative_enhancer	enhancer	1	1
chrI:9842259-9842759	putative_enhancer	enhancer	3	3	1
chrI:984271-984771	coding_promoter	promoter	1	1
chrI:9846199-9846699	coding_promoter	promoter	3	3	2
chrI:984899-985399	coding_promoter	promoter	1	1	1
chrI:9852203-9852581	putative_enhancer	enhancer	2	2	2
chrI:9852581-9852927	putative_enhancer	enhancer	1	1	1
chrI:9853708-9854065	coding_promoter	promoter	9	9	7
chrI:9854065-9854429	coding_promoter	promoter	10	10	7
chrI:9854429-9854915	putative_enhancer	enhancer	1	1	1
chrI:9855236-9855736	coding_promoter	promoter	10	9	6
chrI:9857252-9857656	putative_enhancer	enhancer	1	1	1
chrI:9858129-9858629	putative_enhancer	enhancer	1	1	1
chrI:9858635-9859135	putative_enhancer	enhancer	6	6	5
chrI:9859213-9859713	no_activity	other	1	1	1
chrI:9862527-9862972	putative_enhancer	enhancer	1	1	1
chrI:9862972-9863417	putative_enhancer	enhancer	1	1	1
chrI:986622-987122	unassigned_promoter	promoter	7	7	6
chrI:9869031-9869448	coding_promoter	promoter	27	27	18
chrI:9870050-9870550	putative_enhancer	enhancer	1	1	1
chrI:9870718-9871218	coding_promoter	promoter	8	8	8
chrI:987480-987980	coding_promoter	promoter	3	3	3
chrI:9882056-9882556	coding_promoter	promoter	8	8	7
chrI:9883512-9884012	coding_promoter	promoter	6	6	6
chrI:988830-989330	coding_promoter	promoter	6	6	2
chrI:9900436-9900902	coding_promoter	promoter	4	4	3
chrI:991745-992245	no_annotation	other	1	1	1
chrI:9929343-9929843	coding_promoter	promoter	2	2	2
chrI:9938243-9938719	coding_promoter	promoter	5	5	3
chrI:9941132-9941539	putative_enhancer	enhancer	1	1	1
chrI:9943806-9944306	putative_enhancer	enhancer	1	1	1
chrI:9962654-9963154	coding_promoter	promoter	3	3
chrI:9963601-9964007	coding_promoter	promoter	2	2	1
chrI:9969285-9969785	putative_enhancer	enhancer	1	1	1
chrI:9972973-9973473	coding_promoter	promoter	1	1
chrI:9979634-9980134	coding_promoter	promoter	3	3	2
chrI:9984876-9985376	putative_enhancer	enhancer	24	24	18
chrI:9988665-9989165	coding_promoter	promoter	2	2	1
chrI:999035-999535	putative_enhancer	enhancer	14	14	12
chrII:10000986-10001486	coding_promoter	promoter	7	7	6
chrII:10011331-10011735	putative_enhancer	enhancer	1	1	1
chrII:10015781-10016167	coding_promoter	promoter	1	1	1
chrII:10016167-10016554	putative_enhancer	enhancer	1	1	1
chrII:10024874-10025374	unassigned_promoter	promoter	4	4	2
chrII:10028989-10029489	coding_promoter	promoter	1	1	1
chrII:10044936-10045404	coding_promoter	promoter	3	3	3
chrII:10073320-10073820	putative_enhancer	enhancer	2	1	1
chrII:10075608-10075992	unassigned_promoter	promoter	2	2	1
chrII:10077035-10077535	no_activity	other	1	1
chrII:10094082-10094582	coding_promoter	promoter	3	3	2
chrII:10095112-10095611	putative_enhancer	enhancer	1	1	1
chrII:10099802-10100302	coding_promoter	promoter	3	3	3
chrII:10134180-10134680	coding_promoter	promoter	1	1	1
chrII:10169368-10169802	coding_promoter	promoter	5	5	4
chrII:10172317-10172817	coding_promoter	promoter	2	2	2
chrII:10174210-10174697	coding_promoter	promoter	4	4	4
chrII:10200619-10201119	coding_promoter	promoter	1	1	1
chrII:10202184-10202684	unassigned_promoter	promoter	1	1	1
chrII:10217712-10218112	putative_enhancer	enhancer	1	1
chrII:10220646-10221064	putative_enhancer	enhancer	1	1	1
chrII:10221497-10221997	putative_enhancer	enhancer	1	1
chrII:10231786-10232286	putative_enhancer	enhancer	1	1
chrII:10377774-10378274	unassigned_promoter	promoter	4	4	1
chrII:10382157-10382633	coding_promoter	promoter	16	16	9
chrII:10383449-10383949	putative_enhancer	enhancer	2	2	2
chrII:10384567-10385001	putative_enhancer	enhancer	6	6	5
chrII:10388307-10388638	unassigned_promoter	promoter	3	3	1
chrII:10389014-10389450	unassigned_promoter	promoter	3	3	1
chrII:10389634-10390134	putative_enhancer	enhancer	2	2	2
chrII:10390276-10390776	putative_enhancer	enhancer	7	7	4
chrII:10395236-10395736	coding_promoter	promoter	1	1	1
chrII:10402881-10403381	putative_enhancer	enhancer	1	1	1
chrII:10445659-10446122	coding_promoter	promoter	1	1	1
chrII:10446930-10447279	putative_enhancer	enhancer	1	1	1
chrII:10447279-10447618	putative_enhancer	enhancer	2	2	1
chrII:10485525-10486025	putative_enhancer	enhancer	1	1	1
chrII:10490238-10490738	coding_promoter	promoter	1	1	1
chrII:10500559-10500940	putative_enhancer	enhancer	1	1	1
chrII:10501507-10502007	putative_enhancer	enhancer	9	9	7
chrII:10502515-10503015	coding_promoter	promoter	16	16	9
chrII:10504557-10504986	putative_enhancer	enhancer	5	5	3
chrII:10505841-10506341	coding_promoter	promoter	6	6	3
chrII:10516259-10516759	coding_promoter	promoter	1	1
chrII:10524303-10524803	putative_enhancer	enhancer	1	1
chrII:10525004-10525504	coding_promoter	promoter	3	3	2
chrII:10527529-10528029	coding_promoter	promoter	10	10	5
chrII:10529269-10529769	putative_enhancer	enhancer	4	4	4
chrII:10541726-10542226	coding_promoter	promoter	2	2	2
chrII:10543084-10543551	putative_enhancer	enhancer	1	1	1
chrII:10546511-10547011	putative_enhancer	enhancer	2	2	1
chrII:10547042-10547542	putative_enhancer	enhancer	1	1	1
chrII:10547663-10548104	putative_enhancer	enhancer	2	2	1
chrII:10548104-10548546	putative_enhancer	enhancer	3	3	1
chrII:10548710-10549191	coding_promoter	promoter	17	17	8
chrII:10549191-10549672	putative_enhancer	enhancer	10	10	3
chrII:10549768-10550187	unassigned_promoter	promoter	3	3	2
chrII:10550187-10550607	putative_enhancer	enhancer	3	3	2
chrII:10550665-10551067	putative_enhancer	enhancer	1	1
chrII:10551067-10551470	putative_enhancer	enhancer	2	2	1
chrII:10551511-10551933	putative_enhancer	enhancer	3	3	2
chrII:10551933-10552342	putative_enhancer	enhancer	13	13	5
chrII:10552342-10552744	putative_enhancer	enhancer	2	2	1
chrII:10553208-10553652	putative_enhancer	enhancer	3	3	2
chrII:10553652-10553989	putative_enhancer	enhancer	1	1
chrII:10553989-10554381	putative_enhancer	enhancer	1	1	1
chrII:10555368-10555765	unassigned_promoter	promoter	16	16	3
chrII:10555765-10556167	putative_enhancer	enhancer	3	3	1
chrII:10556617-10557117	unassigned_promoter	promoter	4	4	2
chrII:10557147-10557647	putative_enhancer	enhancer	7	7	3
chrII:10558261-10558744	coding_promoter	promoter	2	2	1
chrII:10558744-10559114	putative_enhancer	enhancer	2	2	1
chrII:10559114-10559456	coding_promoter	promoter	1	1	1
chrII:10559456-10559809	putative_enhancer	enhancer	1	1
chrII:10563358-10563694	coding_promoter	promoter	1	1	1
chrII:1056800-1057300	pseudogene_promoter	promoter	1	1
chrII:10594648-10595148	coding_promoter	promoter	1	1
chrII:10596213-10596713	putative_enhancer	enhancer	2	2	2
chrII:10607116-10607549	coding_promoter	promoter	1	1
chrII:10626973-10627473	putative_enhancer	enhancer	3	3	1
chrII:10628180-10628680	putative_enhancer	enhancer	2	2	1
chrII:10630810-10631310	putative_enhancer	enhancer	1	1
chrII:10646973-10647473	coding_promoter	promoter	1	1
chrII:10657565-10658022	coding_promoter	promoter	1	1
chrII:10693571-10694071	coding_promoter	promoter	3	3	3
chrII:10714120-10714620	coding_promoter	promoter	2	2	2
chrII:10744715-10745215	putative_enhancer	enhancer	1	1
chrII:10761648-10762148	putative_enhancer	enhancer	1	1
chrII:10820645-10821072	coding_promoter	promoter	1	1	1
chrII:10839928-10840428	non-coding_RNA	promoter	1	1
chrII:1084880-1085380	coding_promoter	promoter	3	3	2
chrII:10850976-10851476	putative_enhancer	enhancer	4	4	2
chrII:10860724-10861200	coding_promoter	promoter	2	2
chrII:10862716-10863175	coding_promoter	promoter	3	3	1
chrII:1086442-1086909	putative_enhancer	enhancer	1	1	1
chrII:10867105-10867605	non-coding_RNA	promoter	5	5	4
chrII:10868678-10869177	coding_promoter	promoter	1	1	1
chrII:1090762-1091177	putative_enhancer	enhancer	3	2	2
chrII:10918222-10918722	coding_promoter	promoter	2	2	2
chrII:10924570-10925070	coding_promoter	promoter	4	3	2
chrII:10925563-10926060	coding_promoter	promoter	1	1	1
chrII:10926469-10926881	putative_enhancer	enhancer	1	1	1
chrII:10930712-10931212	no_activity	other	1	1	1
chrII:10945403-10945903	coding_promoter	promoter	2	2	2
chrII:10946774-10947274	coding_promoter	promoter	5	5	5
chrII:10949965-10950465	coding_promoter	promoter	2	2	2
chrII:10990517-10991017	putative_enhancer	enhancer	1	1	1
chrII:1103547-1104047	no_activity	other	4	3	2
chrII:11041618-11042118	putative_enhancer	enhancer	1	1	1
chrII:11042782-11043282	coding_promoter	promoter	13	13	11
chrII:11049764-11050249	coding_promoter	promoter	4	4	3
chrII:11076927-11077401	putative_enhancer	enhancer	1	1	1
chrII:11081338-11081838	putative_enhancer	enhancer	1	1	1
chrII:11083262-11083762	unassigned_promoter	promoter	2	2
chrII:11097283-11097741	coding_promoter	promoter	5	5	5
chrII:11103011-11103469	coding_promoter	promoter	7	7	7
chrII:11106287-11106706	coding_promoter	promoter	2	2	2
chrII:11126309-11126809	coding_promoter	promoter	2	2	2
chrII:11128111-11128611	putative_enhancer	enhancer	1	1	1
chrII:11150839-11151339	putative_enhancer	enhancer	3	3	1
chrII:11152980-11153480	putative_enhancer	enhancer	1	1
chrII:11153763-11154263	coding_promoter	promoter	2	2
chrII:11155408-11155903	putative_enhancer	enhancer	1	1	1
chrII:11156062-11156477	putative_enhancer	enhancer	1	1
chrII:11157601-11158101	non-coding_RNA	promoter	1	1	1
chrII:11160372-11160872	putative_enhancer	enhancer	1	1	1
chrII:11162179-11162679	coding_promoter	promoter	2	2	1
chrII:11166311-11166811	unassigned_promoter	promoter	1	1	1
chrII:11167007-11167507	unassigned_promoter	promoter	2	2	2
chrII:11181095-11181595	coding_promoter	promoter	1	1	1
chrII:11182408-11182874	putative_enhancer	enhancer	1	1	1
chrII:11184843-11185343	coding_promoter	promoter	4	4	4
chrII:11202556-11203036	putative_enhancer	enhancer	1	1
chrII:11205674-11206174	putative_enhancer	enhancer	1	1
chrII:11223849-11224349	non-coding_RNA	promoter	2	2	2
chrII:11236152-11236652	coding_promoter	promoter	1	1	1
chrII:11238837-11239308	coding_promoter	promoter	4	4	2
chrII:11304989-11305489	putative_enhancer	enhancer	1	1	1
chrII:11307213-11307689	unassigned_promoter	promoter	2	2	1
chrII:11337613-11338113	coding_promoter	promoter	3	3
chrII:11347734-11348176	coding_promoter	promoter	1	1	1
chrII:1135093-1135531	putative_enhancer	enhancer	1	1
chrII:11371760-11372260	putative_enhancer	enhancer	2	2	1
chrII:11376625-11377125	putative_enhancer	enhancer	1	1
chrII:1138562-1139062	putative_enhancer	enhancer	5	5	3
chrII:11414070-11414570	putative_enhancer	enhancer	3	3	1
chrII:1141692-1142138	putative_enhancer	enhancer	4	4	3
chrII:11418375-11418875	no_activity	other	1	1
chrII:1142138-1142584	coding_promoter	promoter	5	5	2
chrII:11424470-11424970	putative_enhancer	enhancer	1
chrII:1143200-1143700	putative_enhancer	enhancer	2	2	1
chrII:11448640-11449140	coding_promoter	promoter	1	1	1
chrII:11452884-11453384	coding_promoter	promoter	3	3	3
chrII:11459763-11460263	coding_promoter	promoter	1	1	1
chrII:11464310-11464810	coding_promoter	promoter	12	12	8
chrII:11469591-11470091	coding_promoter	promoter	2	2	2
chrII:11472398-11472898	coding_promoter	promoter	9	9	8
chrII:11473500-11474000	coding_promoter	promoter	3	3	3
chrII:11486716-11487216	coding_promoter	promoter	1
chrII:11491371-11491829	putative_enhancer	enhancer	1	1	1
chrII:11491829-11492288	coding_promoter	promoter	1	1	1
chrII:11492756-11493198	coding_promoter	promoter	3	3	3
chrII:11495369-11495749	coding_promoter	promoter	2	2	2
chrII:11496692-11497192	putative_enhancer	enhancer	1	1	1
chrII:11500145-11500585	coding_promoter	promoter	1	1	1
chrII:11501875-11502375	no_activity	other	1	1	1
chrII:1152644-1153144	putative_enhancer	enhancer	1	1	1
chrII:11536980-11537480	unassigned_promoter	promoter	4	4	4
chrII:11540454-11540954	coding_promoter	promoter	4	4	4
chrII:11542255-11542680	coding_promoter	promoter	2	2	1
chrII:11545200-11545700	coding_promoter	promoter	10	10	10
chrII:11547190-11547643	coding_promoter	promoter	3	3	3
chrII:11569098-11569598	coding_promoter	promoter	1	1	1
chrII:11571310-11571810	coding_promoter	promoter	3	3	2
chrII:11595438-11595938	putative_enhancer	enhancer	1	1	1
chrII:11602421-11602921	coding_promoter	promoter	3	3	2
chrII:11604478-11604978	coding_promoter	promoter	7	7	6
chrII:11611344-11611844	putative_enhancer	enhancer	1	1	1
chrII:11611878-11612378	coding_promoter	promoter	1	1
chrII:11617470-11617970	unassigned_promoter	promoter	6	6	4
chrII:11619006-11619506	putative_enhancer	enhancer	9	9	8
chrII:11619824-11620324	coding_promoter	promoter	14	14	11
chrII:11620542-11621042	putative_enhancer	enhancer	5	5	4
chrII:11621430-11621930	putative_enhancer	enhancer	4	4	4
chrII:11629874-11630374	putative_enhancer	enhancer	3	3	3
chrII:11631355-11631855	putative_enhancer	enhancer	1	1
chrII:11632597-11633097	unassigned_promoter	promoter	15	15	11
chrII:11634048-11634548	coding_promoter	promoter	13	13	10
chrII:11634849-11635349	coding_promoter	promoter	9	9	5
chrII:11635652-11636152	coding_promoter	promoter	13	13	10
chrII:11636487-11636930	putative_enhancer	enhancer	2	2	2
chrII:11641917-11642417	coding_promoter	promoter	1	1	1
chrII:11644291-11644791	putative_enhancer	enhancer	1	1	1
chrII:11646171-11646671	coding_promoter	promoter	4	4	4
chrII:11646708-11647208	putative_enhancer	enhancer	1	1
chrII:11652651-11653151	coding_promoter	promoter	1	1	1
chrII:11675844-11676344	coding_promoter	promoter	1	1	1
chrII:11705703-11706203	unassigned_promoter	promoter	1	1	1
chrII:11710669-11711169	coding_promoter	promoter	1	1	1
chrII:11713429-11713902	coding_promoter	promoter	1	1	1
chrII:11720222-11720722	coding_promoter	promoter	1	1	1
chrII:11724292-11724792	coding_promoter	promoter	7	7	7
chrII:11728391-11728858	coding_promoter	promoter	6	5	5
chrII:11737258-11737746	coding_promoter	promoter	8	8	7
chrII:11743613-11743991	putative_enhancer	enhancer	1	1	1
chrII:11746708-11747208	unassigned_promoter	promoter	5	5	5
chrII:11747817-11748250	putative_enhancer	enhancer	1	1	1
chrII:11748440-11748842	coding_promoter	promoter	2	2	2
chrII:11749567-11750067	coding_promoter	promoter	19	19	18
chrII:11750116-11750616	no_annotation	other	3	3	3
chrII:11751446-11751873	coding_promoter	promoter	5	4	4
chrII:11759183-11759683	coding_promoter	promoter	8	7	7
chrII:11777915-11778415	coding_promoter	promoter	3	3	2
chrII:11813946-11814361	coding_promoter	promoter	4	4	4
chrII:1182055-1182471	no_activity	other	1	1
chrII:11830508-11831008	coding_promoter	promoter	1	1	1
chrII:11833469-11833969	coding_promoter	promoter	1	1
chrII:11836426-11836926	putative_enhancer	enhancer	2	2	1
chrII:11843389-11843857	putative_enhancer	enhancer	3	3	1
chrII:11849419-11849919	putative_enhancer	enhancer	3	3	1
chrII:11852061-11852561	putative_enhancer	enhancer	1	1
chrII:1185446-1185946	putative_enhancer	enhancer	1	1	1
chrII:11854637-11855137	coding_promoter	promoter	4	4	2
chrII:11874565-11875065	coding_promoter	promoter	5	5	3
chrII:11880418-11880893	putative_enhancer	enhancer	2	2	2
chrII:1188078-1188578	putative_enhancer	enhancer	4	3	3
chrII:11880893-11881368	non-coding_RNA	promoter	1	1	1
chrII:11884123-11884623	coding_promoter	promoter	1	1	1
chrII:11889254-11889754	unassigned_promoter	promoter	7	7	5
chrII:1189628-1190128	unassigned_promoter	promoter	3	3	1
chrII:11928715-11929215	no_activity	other	1	1	1
chrII:11935212-11935712	coding_promoter	promoter	2	1	1
chrII:11936723-11937107	no_activity	other	1	1	1
chrII:11952856-11953356	coding_promoter	promoter	3	2	1
chrII:11959091-11959538	non-coding_RNA	promoter	3	3	3
chrII:11967420-11967822	coding_promoter	promoter	3	3	2
chrII:11974383-11974846	no_activity	other	1	1	1
chrII:11979640-11980058	coding_promoter	promoter	5	4	3
chrII:11980058-11980512	coding_promoter	promoter	1	1	1
chrII:1199547-1200047	no_annotation	other	1
chrII:12006621-12007060	coding_promoter	promoter	1	1
chrII:12023350-12023850	coding_promoter	promoter	1	1	1
chrII:12027858-12028257	coding_promoter	promoter	2	2	1
chrII:12040083-12040583	coding_promoter	promoter	13	13	10
chrII:12041993-12042467	coding_promoter	promoter	1	1	1
chrII:12042467-12042941	coding_promoter	promoter	1	1	1
chrII:12050454-12050954	putative_enhancer	enhancer	1	1	1
chrII:12051521-12052021	unassigned_promoter	promoter	2	2	1
chrII:12052030-12052530	putative_enhancer	enhancer	4	4	4
chrII:12052679-12053179	coding_promoter	promoter	2	2	2
chrII:12063007-12063507	coding_promoter	promoter	3	3	2
chrII:12064537-12065037	coding_promoter	promoter	2	2	1
chrII:12081367-12081867	unassigned_promoter	promoter	3	3	2
chrII:12084102-12084602	no_annotation	other	1	1	1
chrII:1208574-1209074	putative_enhancer	enhancer	2	2	1
chrII:12089500-12090000	coding_promoter	promoter	9	8	6
chrII:12095002-12095502	putative_enhancer	enhancer	1	1	1
chrII:1210121-1210621	no_annotation	other	1
chrII:12102235-12102735	coding_promoter	promoter	9	9	7
chrII:12107752-12108252	coding_promoter	promoter	1	1	1
chrII:12162896-12163396	putative_enhancer	enhancer	3	3	2
chrII:12184709-12185209	coding_promoter	promoter	1	1
chrII:12185595-12186095	coding_promoter	promoter	2	2
chrII:12186676-12187112	putative_enhancer	enhancer	2	2	2
chrII:121959-122438	putative_enhancer	enhancer	3	3	3
chrII:12221232-12221732	pseudogene_promoter	promoter	3	3	1
chrII:12222418-12222918	putative_enhancer	enhancer	20	20	15
chrII:12223682-12224182	coding_promoter	promoter	2	2	1
chrII:12224862-12225307	coding_promoter	promoter	1	1
chrII:12237432-12237932	coding_promoter	promoter	5	5	3
chrII:12239326-12239826	putative_enhancer	enhancer	4	4	3
chrII:122438-122918	coding_promoter	promoter	5	5	5
chrII:12261027-12261417	coding_promoter	promoter	3	3	3
chrII:12262452-12262952	unassigned_promoter	promoter	6	6	4
chrII:12268784-12269284	putative_enhancer	enhancer	1	1
chrII:12283-12715	putative_enhancer	enhancer	1	1	1
chrII:1232943-1233443	no_activity	other	1	1	1
chrII:12339022-12339522	coding_promoter	promoter	12	11	8
chrII:12341454-12341954	putative_enhancer	enhancer	1	1
chrII:12344698-12345198	no_activity	other	1	1	1
chrII:1234865-1235315	putative_enhancer	enhancer	1	1	1
chrII:12349700-12350166	putative_enhancer	enhancer	1	1	1
chrII:12350717-12351217	putative_enhancer	enhancer	3	3	1
chrII:12352128-12352628	coding_promoter	promoter	2	2	1
chrII:12362175-12362611	non-coding_RNA	promoter	1	1	1
chrII:1236433-1236922	coding_promoter	promoter	3	3	3
chrII:1237819-1238319	coding_promoter	promoter	12	12	6
chrII:12378670-12379170	putative_enhancer	enhancer	1	1	1
chrII:1238784-1239284	putative_enhancer	enhancer	1	1	1
chrII:1239569-1240069	unassigned_promoter	promoter	5	5	3
chrII:1240417-1240917	putative_enhancer	enhancer	2	2	1
chrII:1242461-1242961	putative_enhancer	enhancer	3	3	3
chrII:12425668-12426168	coding_promoter	promoter	6	6	5
chrII:1244430-1244930	putative_enhancer	enhancer	5	5	4
chrII:1246800-1247300	coding_promoter	promoter	18	16	8
chrII:12512884-12513384	no_activity	other	3	3	3
chrII:12517843-12518343	coding_promoter	promoter	1
chrII:12518761-12519261	coding_promoter	promoter	3	1	1
chrII:12542701-12543097	no_activity	other	1	1	1
chrII:12577619-12578119	coding_promoter	promoter	5	4	4
chrII:12580059-12580559	no_activity	other	2	2	2
chrII:12580785-12581285	coding_promoter	promoter	1	1	1
chrII:12603652-12604085	coding_promoter	promoter	3	2	1
chrII:12659857-12660357	putative_enhancer	enhancer	3	3	2
chrII:12677891-12678351	coding_promoter	promoter	3	3	1
chrII:12679597-12680097	coding_promoter	promoter	1	1
chrII:12689247-12689747	putative_enhancer	enhancer	1	1	1
chrII:12691264-12691764	putative_enhancer	enhancer	2	2	2
chrII:12692810-12693310	unassigned_promoter	promoter	3	3	2
chrII:1276717-1277217	coding_promoter	promoter	1	1
chrII:12785391-12785772	coding_promoter	promoter	1	1	1
chrII:12796838-12797273	putative_enhancer	enhancer	1	1	1
chrII:12797273-12797709	putative_enhancer	enhancer	2	2	2
chrII:12798633-12799133	coding_promoter	promoter	20	19	11
chrII:12800024-12800524	putative_enhancer	enhancer	4	4	3
chrII:12805614-12806114	coding_promoter	promoter	4	4	4
chrII:12806594-12807094	coding_promoter	promoter	2	2	1
chrII:12816505-12817005	putative_enhancer	enhancer	4	4	4
chrII:12818520-12819020	coding_promoter	promoter	1	1	1
chrII:12823318-12823818	coding_promoter	promoter	5	5	4
chrII:12830211-12830711	coding_promoter	promoter	1	1
chrII:12853327-12853827	coding_promoter	promoter	3	3	2
chrII:12854651-12855151	putative_enhancer	enhancer	1	1	1
chrII:12878640-12879132	coding_promoter	promoter	6	6	2
chrII:12879613-12880113	coding_promoter	promoter	2	2	2
chrII:12892304-12892804	putative_enhancer	enhancer	2	2	2
chrII:12894639-12895071	coding_promoter	promoter	1	1	1
chrII:12895159-12895537	coding_promoter	promoter	3	3	2
chrII:12897488-12897988	coding_promoter	promoter	2	2	2
chrII:12900936-12901436	coding_promoter	promoter	5	5	4
chrII:12904047-12904547	putative_enhancer	enhancer	1	1	1
chrII:12930059-12930559	coding_promoter	promoter	2	2	2
chrII:12931348-12931848	coding_promoter	promoter	5	5	4
chrII:12939017-12939517	putative_enhancer	enhancer	3	3	1
chrII:12944671-12945138	non-coding_RNA	promoter	7	7	2
chrII:12953219-12953719	putative_enhancer	enhancer	5	5	3
chrII:12963554-12964054	putative_enhancer	enhancer	1	1	1
chrII:1297266-1297717	coding_promoter	promoter	1	1	1
chrII:12980139-12980639	coding_promoter	promoter	3	2	2
chrII:12982749-12983249	no_activity	other	1	1	1
chrII:12993909-12994409	putative_enhancer	enhancer	2	2	1
chrII:12995588-12996088	putative_enhancer	enhancer	1	1	1
chrII:12996111-12996611	coding_promoter	promoter	8	8	5
chrII:13002432-13002932	coding_promoter	promoter	2	2	2
chrII:13004041-13004454	unassigned_promoter	promoter	3	3	2
chrII:13004454-13004867	coding_promoter	promoter	4	4	2
chrII:13006128-13006628	putative_enhancer	enhancer	4	4	3
chrII:13013883-13014383	putative_enhancer	enhancer	3	3	2
chrII:13016278-13016778	putative_enhancer	enhancer	1	1	1
chrII:13025905-13026405	putative_enhancer	enhancer	9	9	5
chrII:13029035-13029501	putative_enhancer	enhancer	3	3	2
chrII:13029931-13030395	putative_enhancer	enhancer	3	3	2
chrII:13030663-13031163	coding_promoter	promoter	16	15	7
chrII:13051823-13052323	unassigned_promoter	promoter	4	4	3
chrII:13053181-13053681	putative_enhancer	enhancer	1	1
chrII:13056501-13057001	coding_promoter	promoter	2	2	2
chrII:13065045-13065479	unassigned_promoter	promoter	2	2	1
chrII:13066692-13067192	coding_promoter	promoter	6	6	4
chrII:13072971-13073412	coding_promoter	promoter	7	6	5
chrII:13074727-13075227	putative_enhancer	enhancer	2	2	2
chrII:13075805-13076305	no_annotation	other	1	1	1
chrII:13077653-13078153	coding_promoter	promoter	2	2	1
chrII:13078835-13079253	unassigned_promoter	promoter	2	2	1
chrII:13091198-13091698	putative_enhancer	enhancer	1	1	1
chrII:1309320-1309743	coding_promoter	promoter	2	2	1
chrII:1310039-1310453	coding_promoter	promoter	2	2	2
chrII:13107313-13107813	putative_enhancer	enhancer	4	4	2
chrII:13145015-13145515	coding_promoter	promoter	1	1	1
chrII:13148282-13148666	unassigned_promoter	promoter	1	1	1
chrII:13149856-13150356	coding_promoter	promoter	3	3	3
chrII:1315210-1315710	putative_enhancer	enhancer	2	2	2
chrII:13156839-13157339	coding_promoter	promoter	2	2	2
chrII:13165702-13166202	coding_promoter	promoter	2	2	2
chrII:13167336-13167752	unassigned_promoter	promoter	2	2
chrII:13167752-13168168	putative_enhancer	enhancer	1	1
chrII:1317-1798	putative_enhancer	enhancer	1	1	1
chrII:13170612-13171112	putative_enhancer	enhancer	2	2	1
chrII:13174282-13174782	coding_promoter	promoter	1	1
chrII:13187058-13187487	coding_promoter	promoter	1	1	1
chrII:13187487-13187916	putative_enhancer	enhancer	1	1	1
chrII:13189284-13189784	coding_promoter	promoter	12	12	10
chrII:13190280-13190780	putative_enhancer	enhancer	1	1	1
chrII:13193465-13193965	putative_enhancer	enhancer	1	1	1
chrII:13195042-13195484	coding_promoter	promoter	8	8	6
chrII:13196578-13197028	coding_promoter	promoter	3	3	3
chrII:13198708-13199208	putative_enhancer	enhancer	1	1	1
chrII:13199619-13200119	coding_promoter	promoter	1	1	1
[truncated: 7,734 more rows]
