# Supplementary material for: Accessible Region Conformation Capture (ARC-C) gives high-resolution insights into genome architecture and regulation
Source: Genome Res. 2022 Feb;32(2):357–66. doi: 10.1101/gr.275669.121 (PMC8805715; doi:10.1101/gr.275669.121)
Supplement: Supplemental Material [file supp_gr.275669.121_Supplemental_TableS4.xlsx]

## Sheet: Legend
Table S4 ARC-C and Hi-C aggregate peak analyses
cmap	Dataset
factor	Protein or binding site set
n	number of pairings tested
fc_bg	fold of increased contact frequency relative to local background
p_bg	p value calculated from comparing observed fc_bg to fc_bg of 1000 matched random sets
padj	multiple test corrected p_bg
group	factor annotation

## Sheet: ARC-C Hi-C contact analysis
dataset	factor	n	fc_bg	p_bg	padj	group
ARC-C this study	BLMP-1-down-target	408	2.52908	0.001	0.047	BLMP1_TARGET
Brejc 2017 Hi-C	BLMP-1-down-target	408	0.940165	0.656	1	BLMP1_TARGET
Crane 2015 Hi-C	BLMP-1-down-target	408	0.823284	0.72	1	BLMP1_TARGET
ARC-C this study	BLMP-1-up-target	475	2.33669	0.026	0.988	BLMP1_TARGET
Brejc 2017 Hi-C	BLMP-1-up-target	475	0.908892	0.866	1	BLMP1_TARGET
Crane 2015 Hi-C	BLMP-1-up-target	475	1.00913	0.556	1	BLMP1_TARGET
ARC-C this study	PQN-85	14625	2.71343	0	0	COHESIN
Brejc 2017 Hi-C	PQN-85	14645	1.0642	0.139	1	COHESIN
Crane 2015 Hi-C	PQN-85	14615	1.41624	0.017	1	COHESIN
ARC-C this study	SCC-1	12937	1.85829	0	0	COHESIN
Brejc 2017 Hi-C	SCC-1	12954	1.01332	0.523	1	COHESIN
Crane 2015 Hi-C	SCC-1	12856	1.117	0.464	1	COHESIN
ARC-C this study	CAPG-1	49894	1.5395	0	0	CONDENSIN_I
Brejc 2017 Hi-C	CAPG-1	49808	1.01096	0.513	1	CONDENSIN_I
Crane 2015 Hi-C	CAPG-1	49814	1.2371	0.002	0.202	CONDENSIN_I
ARC-C this study	DPY-26	49761	1.15461	0.005	0.22	CONDENSIN_I
Brejc 2017 Hi-C	DPY-26	49678	1.00962	0.363	1	CONDENSIN_I
Crane 2015 Hi-C	DPY-26	49716	1.07084	0.504	1	CONDENSIN_I
ARC-C this study	DPY-28	49712	1.3419	0	0	CONDENSIN_I
Brejc 2017 Hi-C	DPY-28	49631	1.06982	0.049	1	CONDENSIN_I
Crane 2015 Hi-C	DPY-28	49630	1.21696	0.001	0.102	CONDENSIN_I
ARC-C this study	MIX-1	49357	1.90029	0	0	CONDENSIN_I
Brejc 2017 Hi-C	MIX-1	49324	1.01844	0.416	1	CONDENSIN_I
Crane 2015 Hi-C	MIX-1	49304	1.3335	0	0	CONDENSIN_I
ARC-C this study	SMC-4	6750	2.92131	0	0	CONDENSIN_I
Brejc 2017 Hi-C	SMC-4	6776	1.03079	0.318	1	CONDENSIN_I
Crane 2015 Hi-C	SMC-4	6750	1.74825	0.005	0.49	CONDENSIN_I
ARC-C this study	CAPG-1	49894	1.5395	0	0	CONDENSIN_I_DC
Brejc 2017 Hi-C	CAPG-1	49808	1.01096	0.513	1	CONDENSIN_I_DC
Crane 2015 Hi-C	CAPG-1	49814	1.2371	0.002	0.202	CONDENSIN_I_DC
ARC-C this study	DPY-26	49761	1.15461	0.005	0.22	CONDENSIN_I_DC
Brejc 2017 Hi-C	DPY-26	49678	1.00962	0.363	1	CONDENSIN_I_DC
Crane 2015 Hi-C	DPY-26	49716	1.07084	0.504	1	CONDENSIN_I_DC
ARC-C this study	DPY-27	49653	1.25594	0	0	CONDENSIN_I_DC
Brejc 2017 Hi-C	DPY-27	49589	1.0252	0.219	1	CONDENSIN_I_DC
Crane 2015 Hi-C	DPY-27	49568	1.11059	0.246	1	CONDENSIN_I_DC
ARC-C this study	DPY-28	49712	1.3419	0	0	CONDENSIN_I_DC
Brejc 2017 Hi-C	DPY-28	49631	1.06982	0.049	1	CONDENSIN_I_DC
Crane 2015 Hi-C	DPY-28	49630	1.21696	0.001	0.102	CONDENSIN_I_DC
ARC-C this study	MIX-1	49357	1.90029	0	0	CONDENSIN_I_DC
Brejc 2017 Hi-C	MIX-1	49324	1.01844	0.416	1	CONDENSIN_I_DC
Crane 2015 Hi-C	MIX-1	49304	1.3335	0	0	CONDENSIN_I_DC
ARC-C this study	CAPG-2	5164	2.99201	0	0	CONDENSIN_II
Brejc 2017 Hi-C	CAPG-2	5180	1.21605	0.023	1	CONDENSIN_II
Crane 2015 Hi-C	CAPG-2	5160	1.81644	0.002	0.202	CONDENSIN_II
ARC-C this study	HCP-6	28460	2.7202	0	0	CONDENSIN_II
Brejc 2017 Hi-C	HCP-6	28509	1.07322	0.081	1	CONDENSIN_II
Crane 2015 Hi-C	HCP-6	28335	1.41873	0.002	0.202	CONDENSIN_II
ARC-C this study	KLE-2	49720	1.96803	0	0	CONDENSIN_II
Brejc 2017 Hi-C	KLE-2	49705	1.03258	0.226	1	CONDENSIN_II
Crane 2015 Hi-C	KLE-2	49415	1.12588	0.374	1	CONDENSIN_II
ARC-C this study	MIX-1	49357	1.90029	0	0	CONDENSIN_II
Brejc 2017 Hi-C	MIX-1	49324	1.01844	0.416	1	CONDENSIN_II
Crane 2015 Hi-C	MIX-1	49304	1.3335	0	0	CONDENSIN_II
ARC-C this study	SMC-4	6750	2.92131	0	0	CONDENSIN_II
Brejc 2017 Hi-C	SMC-4	6776	1.03079	0.318	1	CONDENSIN_II
Crane 2015 Hi-C	SMC-4	6750	1.74825	0.005	0.49	CONDENSIN_II
ARC-C this study	DPL-1	14873	2.05016	0	0	DRM
Brejc 2017 Hi-C	DPL-1	14847	1.07993	0.088	1	DRM
Crane 2015 Hi-C	DPL-1	14818	1.30646	0.023	1	DRM
ARC-C this study	EFL-1	18630	1.83655	0	0	DRM
Brejc 2017 Hi-C	EFL-1	18602	1.08114	0.079	1	DRM
Crane 2015 Hi-C	EFL-1	18541	1.24819	0.059	1	DRM
ARC-C this study	LIN-35	6993	2.314	0	0	DRM
Brejc 2017 Hi-C	LIN-35	6984	1.08926	0.085	1	DRM
Crane 2015 Hi-C	LIN-35	6971	1.31575	0.071	1	DRM
ARC-C this study	LIN-37	9117	2.36362	0	0	DRM
Brejc 2017 Hi-C	LIN-37	9105	1.05757	0.173	1	DRM
Crane 2015 Hi-C	LIN-37	9089	1.28545	0.06	1	DRM
ARC-C this study	LIN-52	4387	2.42682	0	0	DRM
Brejc 2017 Hi-C	LIN-52	4381	1.08973	0.094	1	DRM
Crane 2015 Hi-C	LIN-52	4369	1.37898	0.06	1	DRM
ARC-C this study	LIN-53	13299	2.40586	0	0	DRM
Brejc 2017 Hi-C	LIN-53	13277	1.12364	0.046	1	DRM
Crane 2015 Hi-C	LIN-53	13253	1.43033	0.011	1	DRM
ARC-C this study	LIN-54	13211	2.07073	0	0	DRM
Brejc 2017 Hi-C	LIN-54	13194	1.07802	0.106	1	DRM
Crane 2015 Hi-C	LIN-54	13170	1.28152	0.044	1	DRM
ARC-C this study	LIN-9	16738	1.95279	0	0	DRM
Brejc 2017 Hi-C	LIN-9	16708	1.08093	0.104	1	DRM
Crane 2015 Hi-C	LIN-9	16690	1.26878	0.036	1	DRM
ARC-C this study	HPL-2	49649	1.07163	0.48	1	HET
Brejc 2017 Hi-C	HPL-2	49680	1.00743	0.538	1	HET
Crane 2015 Hi-C	HPL-2	49193	1.018	0.682	1	HET
ARC-C this study	LIN-13	49283	1.08281	0.323	1	HET
Brejc 2017 Hi-C	LIN-13	49391	1.03378	0.219	1	HET
Crane 2015 Hi-C	LIN-13	48905	1.09309	0.213	1	HET
ARC-C this study	LIN-61	49376	1.10234	0.342	1	HET
Brejc 2017 Hi-C	LIN-61	49470	0.969237	0.969	1	HET
Crane 2015 Hi-C	LIN-61	48909	0.998756	0.812	1	HET
ARC-C this study	MET-2	49359	1.09531	0.492	1	HET
Brejc 2017 Hi-C	MET-2	49481	1.01783	0.386	1	HET
Crane 2015 Hi-C	MET-2	48919	1.11599	0.162	1	HET
ARC-C this study	CFP-1	49693	2.19853	0	0	OTHER
Brejc 2017 Hi-C	CFP-1	49573	1.16374	0.001	0.104	OTHER
Crane 2015 Hi-C	CFP-1	49581	1.37971	0	0	OTHER
ARC-C this study	EPC-1	45600	2.03625	0	0	OTHER
Brejc 2017 Hi-C	EPC-1	45509	1.04822	0.14	1	OTHER
Crane 2015 Hi-C	EPC-1	45422	1.24073	0.013	1	OTHER
ARC-C this study	HDA-1	20821	2.34148	0	0	OTHER
Brejc 2017 Hi-C	HDA-1	20793	1.036	0.326	1	OTHER
Crane 2015 Hi-C	HDA-1	20737	1.35679	0.019	1	OTHER
ARC-C this study	JMJD-2	6767	2.68264	0	0	OTHER
Brejc 2017 Hi-C	JMJD-2	6752	1.03379	0.327	1	OTHER
Crane 2015 Hi-C	JMJD-2	6734	1.61788	0.005	0.49	OTHER
ARC-C this study	LET-418	49602	1.30456	0	0	OTHER
Brejc 2017 Hi-C	LET-418	49617	1.00541	0.606	1	OTHER
Crane 2015 Hi-C	LET-418	49370	1.16213	0.059	1	OTHER
ARC-C this study	NURF-1	49892	2.11885	0	0	OTHER
Brejc 2017 Hi-C	NURF-1	49822	1.04168	0.224	1	OTHER
Crane 2015 Hi-C	NURF-1	49723	1.24667	0.009	0.855	OTHER
ARC-C this study	SIN-3	32099	1.74529	0	0	OTHER
Brejc 2017 Hi-C	SIN-3	32078	1.00362	0.653	1	OTHER
Crane 2015 Hi-C	SIN-3	31981	1.18688	0.083	1	OTHER
ARC-C this study	TOP-2	2264	0.969687	0.965	1	OTHER
Brejc 2017 Hi-C	TOP-2	2269	0.723505	1	1	OTHER
Crane 2015 Hi-C	TOP-2	2249	0.430577	1	1	OTHER
ARC-C this study	ZFP-1	49728	2.73013	0	0	OTHER
Brejc 2017 Hi-C	ZFP-1	49597	1.00252	0.939	1	OTHER
Crane 2015 Hi-C	ZFP-1	49630	1.35951	0	0	OTHER
ARC-C this study	ATF-7	933	1.05779	0.69	1	TF
Brejc 2017 Hi-C	ATF-7	933	1.01911	0.346	1	TF
Crane 2015 Hi-C	ATF-7	930	1.19275	0.273	1	TF
ARC-C this study	ATHP-1	1277	1.2525	0.218	1	TF
Brejc 2017 Hi-C	ATHP-1	1274	0.926277	0.785	1	TF
Crane 2015 Hi-C	ATHP-1	1276	1.09321	0.349	1	TF
ARC-C this study	B0261.1	2408	1.38383	0.032	1	TF
Brejc 2017 Hi-C	B0261.1	2412	1.20967	0.035	1	TF
Crane 2015 Hi-C	B0261.1	2393	1.35709	0.115	1	TF
ARC-C this study	BLMP-1	9905	2.19673	0	0	TF
Brejc 2017 Hi-C	BLMP-1	9906	0.934881	1	1	TF
Crane 2015 Hi-C	BLMP-1	9876	1.01897	0.902	1	TF
ARC-C this study	C34F6.9	9754	1.52902	0	0	TF
Brejc 2017 Hi-C	C34F6.9	9737	1.0268	0.315	1	TF
Crane 2015 Hi-C	C34F6.9	9743	1.15561	0.229	1	TF
ARC-C this study	CEBP-1	31339	1.20199	0.059	1	TF
Brejc 2017 Hi-C	CEBP-1	31288	1.02987	0.264	1	TF
Crane 2015 Hi-C	CEBP-1	31244	1.06598	0.464	1	TF
ARC-C this study	CEH-18	2060	2.71157	0	0	TF
Brejc 2017 Hi-C	CEH-18	2052	1.02085	0.336	1	TF
Crane 2015 Hi-C	CEH-18	2059	0.916008	0.785	1	TF
ARC-C this study	CEH-31	5487	1.28753	0.13	1	TF
Brejc 2017 Hi-C	CEH-31	5478	0.979902	0.655	1	TF
Crane 2015 Hi-C	CEH-31	5480	1.23358	0.123	1	TF
ARC-C this study	CEH-34	2635	1.32581	0.101	1	TF
Brejc 2017 Hi-C	CEH-34	2622	0.895152	0.986	1	TF
Crane 2015 Hi-C	CEH-34	2632	1.33419	0.096	1	TF
ARC-C this study	CEH-36	14961	1.08932	0.705	1	TF
Brejc 2017 Hi-C	CEH-36	14924	1.06943	0.119	1	TF
Crane 2015 Hi-C	CEH-36	14913	1.05574	0.515	1	TF
ARC-C this study	CEH-38	25527	0.96933	0.957	1	TF
Brejc 2017 Hi-C	CEH-38	25502	1.03199	0.267	1	TF
Crane 2015 Hi-C	CEH-38	25408	1.2884	0.009	0.855	TF
ARC-C this study	CEH-48	7470	1.01901	0.661	1	TF
Brejc 2017 Hi-C	CEH-48	7440	1.15059	0.048	1	TF
Crane 2015 Hi-C	CEH-48	7432	1.41904	0.026	1	TF
ARC-C this study	CES-1	49792	1.27112	0	0	TF
Brejc 2017 Hi-C	CES-1	49643	0.98182	0.861	1	TF
Crane 2015 Hi-C	CES-1	49733	1.0062	0.831	1	TF
ARC-C this study	CRH-2	7872	2.0016	0	0	TF
Brejc 2017 Hi-C	CRH-2	7850	1.00382	0.551	1	TF
Crane 2015 Hi-C	CRH-2	7856	1.13958	0.285	1	TF
ARC-C this study	DAF-16	49859	1.84745	0	0	TF
Brejc 2017 Hi-C	DAF-16	49742	1.07973	0.058	1	TF
Crane 2015 Hi-C	DAF-16	49786	1.03342	0.813	1	TF
ARC-C this study	DSC-1	49779	1.1356	0.01	0.42	TF
Brejc 2017 Hi-C	DSC-1	49632	0.995503	0.645	1	TF
Crane 2015 Hi-C	DSC-1	49732	1.067	0.444	1	TF
ARC-C this study	DVE-1	49874	2.22558	0	0	TF
Brejc 2017 Hi-C	DVE-1	49741	1.02111	0.431	1	TF
Crane 2015 Hi-C	DVE-1	49797	1.02476	0.888	1	TF
ARC-C this study	EGL-13	1932	1.18252	0.212	1	TF
Brejc 2017 Hi-C	EGL-13	1927	1.08068	0.126	1	TF
Crane 2015 Hi-C	EGL-13	1928	0.971704	0.585	1	TF
ARC-C this study	EGL-5	4871	1.55696	0	0	TF
Brejc 2017 Hi-C	EGL-5	4855	0.972982	0.716	1	TF
Crane 2015 Hi-C	EGL-5	4866	1.03632	0.525	1	TF
ARC-C this study	ELT-1	6524	1.60904	0	0	TF
Brejc 2017 Hi-C	ELT-1	6504	1.01581	0.383	1	TF
Crane 2015 Hi-C	ELT-1	6522	1.05532	0.459	1	TF
ARC-C this study	ELT-2	32282	3.65233	0	0	TF
Brejc 2017 Hi-C	ELT-2	32185	1.02194	0.499	1	TF
Crane 2015 Hi-C	ELT-2	32216	1.16046	0.204	1	TF
ARC-C this study	ELT-3	6580	2.85502	0	0	TF
Brejc 2017 Hi-C	ELT-3	6565	0.992628	0.626	1	TF
Crane 2015 Hi-C	ELT-3	6573	1.08339	0.464	1	TF
ARC-C this study	EOR-1	37447	1.41781	0.009	0.387	TF
Brejc 2017 Hi-C	EOR-1	37370	1.06705	0.058	1	TF
Crane 2015 Hi-C	EOR-1	37346	1.05367	0.672	1	TF
ARC-C this study	F13H6.1	6663	1.58587	0.003	0.135	TF
Brejc 2017 Hi-C	F13H6.1	6639	1.03039	0.292	1	TF
Crane 2015 Hi-C	F13H6.1	6658	1.10512	0.408	1	TF
ARC-C this study	F49E8.2	3794	1.33739	0.024	0.936	TF
Brejc 2017 Hi-C	F49E8.2	3793	0.998878	0.483	1	TF
Crane 2015 Hi-C	F49E8.2	3784	1.09467	0.368	1	TF
ARC-C this study	FKH-10	10396	1.46625	0	0	TF
Brejc 2017 Hi-C	FKH-10	10364	0.94248	0.951	1	TF
Crane 2015 Hi-C	FKH-10	10392	1.0307	0.562	1	TF
ARC-C this study	FKH-8	42996	1.13018	0.027	0.999	TF
Brejc 2017 Hi-C	FKH-8	42907	0.976769	0.895	1	TF
Crane 2015 Hi-C	FKH-8	42963	0.994795	0.876	1	TF
ARC-C this study	FOS-1	49931	2.81781	0	0	TF
Brejc 2017 Hi-C	FOS-1	49802	1.0815	0.044	1	TF
Crane 2015 Hi-C	FOS-1	49854	1.04098	0.87	1	TF
ARC-C this study	HIF-1	1704	1.54029	0.069	1	TF
Brejc 2017 Hi-C	HIF-1	1695	0.956285	0.776	1	TF
Crane 2015 Hi-C	HIF-1	1701	1.11727	0.378	1	TF
ARC-C this study	HIM-1	12301	1.11722	0.215	1	TF
Brejc 2017 Hi-C	HIM-1	12280	0.991366	0.59	1	TF
Crane 2015 Hi-C	HIM-1	12265	1.16087	0.143	1	TF
ARC-C this study	HLH-1	16932	2.14339	0	0	TF
Brejc 2017 Hi-C	HLH-1	16887	1.05114	0.16	1	TF
Crane 2015 Hi-C	HLH-1	16913	1.09726	0.39	1	TF
ARC-C this study	HLH-30	37328	1.5185	0	0	TF
Brejc 2017 Hi-C	HLH-30	37243	1.01603	0.482	1	TF
Crane 2015 Hi-C	HLH-30	37290	1.04867	0.736	1	TF
ARC-C this study	HLH-4	1340	1.21657	0.164	1	TF
Brejc 2017 Hi-C	HLH-4	1339	1.00499	0.361	1	TF
Crane 2015 Hi-C	HLH-4	1341	0.830818	0.73	1	TF
ARC-C this study	HMG-11	2176	1.86664	0.001	0.047	TF
Brejc 2017 Hi-C	HMG-11	2170	0.894506	0.989	1	TF
Crane 2015 Hi-C	HMG-11	2167	0.781384	0.937	1	TF
ARC-C this study	JUN-1	1879	3.28919	0	0	TF
Brejc 2017 Hi-C	JUN-1	1878	1.00541	0.462	1	TF
Crane 2015 Hi-C	JUN-1	1875	1.05678	0.499	1	TF
ARC-C this study	LSY-2	49761	1.23775	0.39	1	TF
Brejc 2017 Hi-C	LSY-2	49638	0.988751	0.901	1	TF
Crane 2015 Hi-C	LSY-2	49564	0.989322	0.951	1	TF
ARC-C this study	MDL-1	10809	1.579	0.013	0.533	TF
Brejc 2017 Hi-C	MDL-1	10781	0.984896	0.81	1	TF
Crane 2015 Hi-C	MDL-1	10796	1.11479	0.364	1	TF
ARC-C this study	MLS-2	1448	1.16783	0.451	1	TF
Brejc 2017 Hi-C	MLS-2	1445	0.895897	0.947	1	TF
Crane 2015 Hi-C	MLS-2	1446	1.24224	0.239	1	TF
ARC-C this study	NFYA-1	13379	1.17576	0.122	1	TF
Brejc 2017 Hi-C	NFYA-1	13372	1.0411	0.203	1	TF
Crane 2015 Hi-C	NFYA-1	13354	1.15617	0.192	1	TF
ARC-C this study	NHR-20	14080	1.69798	0	0	TF
Brejc 2017 Hi-C	NHR-20	14039	1.00163	0.602	1	TF
Crane 2015 Hi-C	NHR-20	14064	1.05968	0.58	1	TF
ARC-C this study	NHR-21	3611	2.30017	0	0	TF
Brejc 2017 Hi-C	NHR-21	3599	1.02444	0.349	1	TF
Crane 2015 Hi-C	NHR-21	3610	0.969147	0.74	1	TF
ARC-C this study	NHR-23	20317	2.28669	0	0	TF
Brejc 2017 Hi-C	NHR-23	20259	1.02288	0.385	1	TF
Crane 2015 Hi-C	NHR-23	20295	0.958661	0.968	1	TF
ARC-C this study	NHR-25	27066	2.20131	0	0	TF
Brejc 2017 Hi-C	NHR-25	26996	1.04891	0.184	1	TF
Crane 2015 Hi-C	NHR-25	27041	1.03295	0.782	1	TF
ARC-C this study	NHR-47	8017	1.17628	0.083	1	TF
Brejc 2017 Hi-C	NHR-47	7987	1.01704	0.331	1	TF
Crane 2015 Hi-C	NHR-47	8006	0.891235	0.908	1	TF
ARC-C this study	NHR-48	1695	1.78557	0	0	TF
Brejc 2017 Hi-C	NHR-48	1689	1.02965	0.289	1	TF
Crane 2015 Hi-C	NHR-48	1695	0.83071	0.864	1	TF
ARC-C this study	NHR-71	49884	1.22372	0.04	1	TF
Brejc 2017 Hi-C	NHR-71	49744	0.99677	0.751	1	TF
Crane 2015 Hi-C	NHR-71	49801	1.00787	0.881	1	TF
ARC-C this study	NHR-80	49882	2.40944	0	0	TF
Brejc 2017 Hi-C	NHR-80	49774	1.00379	0.762	1	TF
Crane 2015 Hi-C	NHR-80	49793	1.09006	0.403	1	TF
ARC-C this study	NHR-85	5040	2.1853	0	0	TF
Brejc 2017 Hi-C	NHR-85	5032	0.974427	0.768	1	TF
Crane 2015 Hi-C	NHR-85	5036	0.979231	0.715	1	TF
ARC-C this study	NHR-90	2696	1.377	0.14	1	TF
Brejc 2017 Hi-C	NHR-90	2689	1.04715	0.229	1	TF
Crane 2015 Hi-C	NHR-90	2687	0.818305	0.923	1	TF
ARC-C this study	PHA-4	49936	1.55229	0	0	TF
Brejc 2017 Hi-C	PHA-4	49819	1.00318	0.689	1	TF
Crane 2015 Hi-C	PHA-4	49888	1.09016	0.359	1	TF
ARC-C this study	PQM-1	49862	3.14204	0	0	TF
Brejc 2017 Hi-C	PQM-1	49744	1.06625	0.1	1	TF
Crane 2015 Hi-C	PQM-1	49764	1.13041	0.204	1	TF
ARC-C this study	REF-2	1190	1.19292	0.473	1	TF
Brejc 2017 Hi-C	REF-2	1178	1.13745	0.09	1	TF
Crane 2015 Hi-C	REF-2	1189	0.748181	0.881	1	TF
ARC-C this study	REPO-1	2285	1.03951	0.6	1	TF
Brejc 2017 Hi-C	REPO-1	2278	1.02019	0.353	1	TF
Crane 2015 Hi-C	REPO-1	2282	0.929408	0.648	1	TF
ARC-C this study	RNT-1	36578	2.21376	0	0	TF
Crane 2015 Hi-C	RNT-1	36521	1.07844	0.529	1	TF
ARC-C this study	RPC-1	43621	1.12149	0.037	1	TF
Brejc 2017 Hi-C	RPC-1	43548	1.02549	0.289	1	TF
Crane 2015 Hi-C	RPC-1	43451	1.11189	0.211	1	TF
ARC-C this study	SMA-3	8227	1.94602	0	0	TF
Brejc 2017 Hi-C	SMA-3	8205	0.991541	0.68	1	TF
Crane 2015 Hi-C	SMA-3	8209	0.860624	0.981	1	TF
ARC-C this study	SMA-9	45686	1.64159	0	0	TF
Brejc 2017 Hi-C	SMA-9	45544	1.02171	0.492	1	TF
Crane 2015 Hi-C	SMA-9	45644	0.986308	0.984	1	TF
ARC-C this study	SNPC-1.1	3926	1.3836	0.018	0.72	TF
Brejc 2017 Hi-C	SNPC-1.1	3923	0.969296	0.726	1	TF
Crane 2015 Hi-C	SNPC-1.1	3924	0.965332	0.663	1	TF
ARC-C this study	SNPC-3.4	5008	1.2642	0.059	1	TF
Brejc 2017 Hi-C	SNPC-3.4	5002	0.984999	0.594	1	TF
Crane 2015 Hi-C	SNPC-3.4	4996	1.62018	0.007	0.672	TF
ARC-C this study	SNPC-4	49653	1.04478	0.74	1	TF
Brejc 2017 Hi-C	SNPC-4	49582	1.06138	0.2	1	TF
Crane 2015 Hi-C	SNPC-4	49470	0.984967	0.935	1	TF
ARC-C this study	SNU-23	49776	1.59943	0	0	TF
Brejc 2017 Hi-C	SNU-23	49665	1.01989	0.477	1	TF
Crane 2015 Hi-C	SNU-23	49710	0.99952	0.959	1	TF
ARC-C this study	SPTF-1	2797	1.2942	0.089	1	TF
Brejc 2017 Hi-C	SPTF-1	2788	1.05523	0.186	1	TF
Crane 2015 Hi-C	SPTF-1	2788	1.14456	0.269	1	TF
ARC-C this study	SWSN-7	1495	1.25268	0.348	1	TF
Brejc 2017 Hi-C	SWSN-7	1494	1.54937	0.01	1	TF
Crane 2015 Hi-C	SWSN-7	1494	1.83823	0.019	1	TF
ARC-C this study	TBX-2	2878	1.08199	0.885	1	TF
Brejc 2017 Hi-C	TBX-2	2856	0.965623	0.706	1	TF
Crane 2015 Hi-C	TBX-2	2877	1.1398	0.324	1	TF
ARC-C this study	UNC-130	10261	1.16437	0.257	1	TF
Brejc 2017 Hi-C	UNC-130	10247	1.02525	0.329	1	TF
Crane 2015 Hi-C	UNC-130	10227	0.991065	0.682	1	TF
ARC-C this study	UNC-42	41676	1.32125	0	0	TF
Brejc 2017 Hi-C	UNC-42	41562	0.973929	0.921	1	TF
Crane 2015 Hi-C	UNC-42	41642	0.983786	0.906	1	TF
ARC-C this study	UNC-55	49823	1.2918	0	0	TF
Brejc 2017 Hi-C	UNC-55	49695	0.990705	0.841	1	TF
Crane 2015 Hi-C	UNC-55	49760	1.0398	0.667	1	TF
ARC-C this study	UNC-86	7072	1.24396	0.028	1	TF
Brejc 2017 Hi-C	UNC-86	7047	0.971674	0.687	1	TF
Crane 2015 Hi-C	UNC-86	7064	1.17181	0.208	1	TF
ARC-C this study	XND-1	15908	1.27992	0	0	TF
Brejc 2017 Hi-C	XND-1	15887	1.01177	0.452	1	TF
Crane 2015 Hi-C	XND-1	15840	1.0369	0.51	1	TF
ARC-C this study	ZIP-8	45257	1.05728	0.42	1	TF
Brejc 2017 Hi-C	ZIP-8	45164	1.05308	0.149	1	TF
Crane 2015 Hi-C	ZIP-8	45140	0.951452	0.957	1	TF
ARC-C this study	ZTF-18	1415	1.26636	0.17	1	TF
Brejc 2017 Hi-C	ZTF-18	1410	1.11422	0.124	1	TF
Crane 2015 Hi-C	ZTF-18	1406	1.44121	0.121	1	TF
