# Supplementary material for: Accessible Region Conformation Capture (ARC-C) gives high-resolution insights into genome architecture and regulation
Source: Genome Res. 2022 Feb;32(2):357–66. doi: 10.1101/gr.275669.121 (PMC8805715; doi:10.1101/gr.275669.121)
Supplement: Supplemental Material [file supp_gr.275669.121_Supplemental_TableS5.xlsx]

## Sheet: Legend
Table S5 blmp-1 aggregate peak analyses
factor	Protein or binding site set
WT	fold of increased contact frequency relative to local background in wild-type
blmp-1	fold of increased contact frequency relative to local background in blmp-1
residuals	difference between log2(blmp1) and log2(WT_ajusted)
group	factor annotation
p	p value calculated from boot strapping residual distribution
padj	multiple test corrected p values

## Sheet: WT-vs-blmp-1 contact analysis
factor	WT	blmp-1	residuals	group	p	padj
BLMP-1	2.19673	1.54887	-0.0826691	TF	0.627	0.9696
BLMP-1-down-target	2.52908	0.784537	-1.21024	BLMP1_TARGET	0	0
BLMP-1-up-target	2.33669	1.28136	-0.420342	BLMP1_TARGET	0.0605	0.7655
C34F6.9	1.52902	1.2049	-0.0687658	TF	0.673	0.9696
CAPG-1	1.5395	1.28994	0.0225273	CONDENSIN_I	0.9117	0.9696
CAPG-1	1.5395	1.28994	0.0225273	CONDENSIN_I_DC	0.9117	0.9696
CAPG-2	2.99201	2.39014	0.222418	CONDENSIN_II	0.2135	0.9257
CEH-18	2.71157	1.38248	-0.46524	TF	0.0298	0.6655
CES-1	1.27112	1.19057	0.105765	TF	0.5534	0.9287
CFP-1	2.19853	1.77349	0.111854	OTHER	0.5134	0.9287
CRH-2	2.0016	1.50261	-0.0298372	TF	0.8638	0.9696
DAF-16	1.84745	1.42135	-0.0268348	TF	0.8949	0.9696
DPL-1	2.05016	1.6958	0.119772	DRM	0.454	0.9287
DPY-27	1.25594	1.1221	0.0327828	CONDENSIN_I_DC	0.8513	0.9696
DPY-28	1.3419	1.28263	0.156956	CONDENSIN_I	0.3316	0.9257
DPY-28	1.3419	1.28263	0.156956	CONDENSIN_I_DC	0.3316	0.9257
DVE-1	2.22558	1.52402	-0.119547	TF	0.4685	0.9287
EFL-1	1.83655	1.49278	0.050047	DRM	0.7449	0.9696
EGL-5	1.55696	1.16357	-0.13793	TF	0.3783	0.9287
ELT-1	1.60904	1.39986	0.094639	TF	0.5666	0.9287
ELT-2	3.65233	2.44942	0.0507155	TF	0.7326	0.9696
ELT-3	2.85502	1.491	-0.409743	TF	0.0763	0.7655
EPC-1	2.03625	1.50084	-0.0493492	OTHER	0.7624	0.9696
FKH-10	1.46625	1.28243	0.064716	TF	0.702	0.9696
FOS-1	2.81781	1.7462	-0.168177	TF	0.318	0.9257
HCP-6	2.7202	2.17747	0.186855	CONDENSIN_II	0.2722	0.9257
HDA-1	2.34148	1.75275	0.0294755	OTHER	0.8803	0.9696
HLH-1	2.14339	1.55508	-0.0513735	TF	0.7181	0.9696
HLH-30	1.5185	1.26474	0.00832606	TF	0.9698	0.9845
HMG-11	1.86664	1.16746	-0.321453	TF	0.1398	0.9257
JMJD-2	2.68264	2.04226	0.108808	OTHER	0.5272	0.9287
2001-06-01	3.28919	1.97842	-0.148645	TF	0.361	0.9287
KLE-2	1.96803	1.59238	0.0714406	CONDENSIN_II	0.657	0.9696
LET-418	1.30456	1.22798	0.123436	OTHER	0.4226	0.9287
LIN-9	1.95279	1.71477	0.186339	DRM	0.2871	0.9257
LIN-35	2.314	1.98051	0.217985	DRM	0.2291	0.9257
LIN-37	2.36362	1.89905	0.13537	DRM	0.395	0.9287
LIN-52	2.42682	2.03055	0.204565	DRM	0.2436	0.9257
LIN-53	2.40586	1.79677	0.037103	DRM	0.8219	0.9696
LIN-54	2.07073	1.61194	0.0362394	DRM	0.8372	0.9696
MIX-1	1.90029	1.57292	0.0900663	CONDENSIN_I	0.5822	0.9287
MIX-1	1.90029	1.57292	0.0900663	CONDENSIN_II	0.5822	0.9287
MIX-1	1.90029	1.57292	0.0900663	CONDENSIN_I_DC	0.5822	0.9287
NHR-20	1.69798	1.19145	-0.193791	TF	0.2577	0.9257
NHR-21	2.30017	1.16058	-0.546816	TF	0.0134	0.4489
NHR-23	2.28669	1.31773	-0.357495	TF	0.1231	0.9164
NHR-25	2.20131	1.68608	0.0376254	TF	0.806	0.9696
NHR-48	1.78557	1.71903	0.282871	TF	0.1683	0.9257
NHR-80	2.40944	1.5977	-0.133846	TF	0.4086	0.9287
NHR-85	2.1853	1.55274	-0.0736493	TF	0.6417	0.9696
NURF-1	2.11885	1.64134	0.0384669	OTHER	0.791	0.9696
PHA-4	1.55229	1.25914	-0.0209259	TF	0.9413	0.9845
PQM-1	3.14204	1.87863	-0.175793	TF	0.3016	0.9257
PQN-85	2.71343	2.37769	0.31635	COHESIN	0.1543	0.9257
RNT-1	2.21376	1.51888	-0.118898	TF	0.4843	0.9287
SCC-1	1.85829	1.69735	0.223118	COHESIN	0.1977	0.9257
SIN-3	1.74529	1.43131	0.0423012	OTHER	0.7753	0.9696
SMA-3	1.94602	1.62073	0.108576	TF	0.542	0.9287
SMA-9	1.64159	1.3171	-0.014071	TF	0.9574	0.9845
SMC-4	2.92131	2.58605	0.360901	CONDENSIN_I	0.0914	0.7655
SMC-4	2.92131	2.58605	0.360901	CONDENSIN_II	0.0914	0.7655
SNU-23	1.59943	1.20308	-0.117697	TF	0.4983	0.9287
UNC-42	1.32125	1.13522	-0.00307409	TF	0.9858	0.9858
UNC-55	1.2918	1.21752	0.121299	TF	0.4379	0.9287
XND-1	1.27992	1.16481	0.0670436	TF	0.6881	0.9696
ZFP-1	2.73013	2.27551	0.246612	OTHER	0.183	0.9257
rex	7.53607	5.37435	0.432324	REX	0.0448	0.7504
