# Supplementary material for: Accessible Region Conformation Capture (ARC-C) gives high-resolution insights into genome architecture and regulation
Source: Genome Res. 2022 Feb;32(2):357–66. doi: 10.1101/gr.275669.121 (PMC8805715; doi:10.1101/gr.275669.121)
Supplement: Supplemental Material [file supp_gr.275669.121_Supplemental_TableS6.xlsx]

## Sheet: Title
Table S6 blmp-1 gene expression analyses

## Sheet: GSE55225.blmp1-vs-N2.DE_genes
gene	baseMean	log2FoldChange	lfcSE	stat	pvalue	padj	boundByBLMP-1
WBGene00000016	206.362	1.35519	0.258	5.25266	1.49915e-07	4.97277e-06	no
WBGene00000017	426.702	0.890032	0.245691	3.62257	0.000291695	0.00361885	no
WBGene00000027	76.4256	-2.4064	0.25222	-9.54088	1.41626e-21	3.65812e-19	no
WBGene00000031	7487.72	0.622859	0.163525	3.80896	0.000139554	0.00194414	no
WBGene00000038	65.9147	0.805423	0.225933	3.56488	0.00036402	0.00431566	no
WBGene00000051	332.998	1.02652	0.149471	6.8677	6.52431e-12	4.96604e-10	no
WBGene00000061	75.8251	1.01432	0.245883	4.12522	3.7038e-05	0.000617535	no
WBGene00000133	98.1077	1.15185	0.297462	3.87224	0.00010784	0.00157241	no
WBGene00000176	3103.26	1.56675	0.264833	5.91601	3.29848e-09	1.58932e-07	no
WBGene00000190	308.204	0.933492	0.282751	3.30146	0.000961837	0.00950734	no
WBGene00000191	123.109	1.57457	0.210517	7.47956	7.45711e-14	7.67936e-12	no
WBGene00000233	751.745	0.644438	0.194545	3.31254	0.000924531	0.00919048	no
WBGene00000246	716.201	0.938006	0.197571	4.7477	2.05744e-06	4.91913e-05	no
WBGene00000252	915.215	0.829693	0.261022	3.17863	0.00147972	0.0135628	no
WBGene00000255	355.548	-1.01606	0.195643	-5.19343	2.0646e-07	6.55842e-06	no
WBGene00000273	18512.3	0.926201	0.115962	7.98713	1.3812e-15	1.78379e-13	no
WBGene00000373	1707.11	0.809299	0.271875	2.97673	0.00291339	0.022702	no
WBGene00000415	3292.88	0.792567	0.125175	6.33169	2.42493e-10	1.36454e-08	no
WBGene00000493	666.317	-1.72159	0.226794	-7.59097	3.17522e-14	3.49852e-12	yes
WBGene00000512	1731.68	1.06392	0.159892	6.65398	2.85265e-11	1.98002e-09	no
WBGene00000516	733.382	0.742273	0.135646	5.47213	4.44671e-08	1.66025e-06	no
WBGene00000535	2941.86	1.60527	0.168897	9.50443	2.01139e-21	5.0304e-19	no
WBGene00000539	671.324	-0.666578	0.11831	-5.63414	1.75931e-08	7.19992e-07	no
WBGene00000556	214.921	3.0755	0.198943	15.4592	6.54238e-54	7.92937e-51	no
WBGene00000558	1934.69	5.2031	0.213031	24.4241	9.48329e-132	7.47094e-128	no
WBGene00000594	7921.61	0.750625	0.247458	3.03335	0.00241856	0.0196833	no
WBGene00000624	389.514	-0.706994	0.250521	-2.82209	0.00477116	0.0336043	no
WBGene00000631	7712.36	-0.803119	0.221507	-3.62571	0.000288167	0.00358356	no
WBGene00000634	1551.43	-0.938176	0.224337	-4.18199	2.88963e-05	0.00049813	no
WBGene00000637	320.482	-0.968876	0.20822	-4.65314	3.26922e-06	7.47603e-05	no
WBGene00000641	14552.6	-0.714644	0.224076	-3.18929	0.00142622	0.0131567	no
WBGene00000645	327.73	-0.764754	0.220824	-3.46318	0.000533837	0.00584919	no
WBGene00000649	79451.5	-1.10361	0.231277	-4.7718	1.82589e-06	4.41238e-05	no
WBGene00000652	1144.87	-0.617627	0.149038	-4.14409	3.41172e-05	0.000576771	no
WBGene00000653	20369.5	-1.47345	0.178002	-8.27771	1.25566e-16	1.9208e-14	no
WBGene00000663	181.354	-2.23259	0.281022	-7.94454	1.94911e-15	2.43731e-13	yes
WBGene00000665	60716.2	-1.21464	0.232223	-5.23049	1.6906e-07	5.51493e-06	no
WBGene00000666	5411.7	-1.81493	0.177706	-10.2131	1.73299e-24	5.57244e-22	no
WBGene00000669	5268.77	0.955826	0.16686	5.72831	1.01436e-08	4.50205e-07	no
WBGene00000672	18795.5	-0.615274	0.185713	-3.31304	0.000922869	0.00918412	no
WBGene00000673	16303.6	1.85083	0.286336	6.46383	1.02085e-10	6.25857e-09	no
WBGene00000677	21391.6	1.89533	0.270796	6.99911	2.57593e-12	2.02932e-10	no
WBGene00000678	13752.5	-0.852275	0.189682	-4.49317	7.01702e-06	0.000144146	no
WBGene00000687	4608.95	1.38272	0.190928	7.24208	4.41859e-13	3.9112e-11	no
WBGene00000689	2290.03	-1.26432	0.192001	-6.58497	4.54986e-11	3.06357e-09	no
WBGene00000691	10463.2	0.600866	0.14393	4.17472	2.98351e-05	0.000512631	no
WBGene00000694	178.065	-1.2222	0.289512	-4.22157	2.42611e-05	0.000427105	no
WBGene00000698	2914.9	-1.6081	0.359598	-4.47193	7.75169e-06	0.000156584	no
WBGene00000702	802.371	-0.833266	0.250735	-3.3233	0.000889602	0.0089378	no
WBGene00000707	14625	-1.23151	0.200104	-6.15435	7.53848e-10	4.01271e-08	no
WBGene00000710	42.8877	-1.63957	0.303834	-5.39627	6.80419e-08	2.431e-06	no
WBGene00000714	564.925	2.22269	0.298222	7.45315	9.11365e-14	9.26417e-12	no
WBGene00000715	4481.37	1.3074	0.28365	4.6092	4.04224e-06	9.0468e-05	no
WBGene00000719	12544	1.00143	0.242213	4.1345	3.55726e-05	0.000597529	no
WBGene00000720	24754.8	1.26239	0.267223	4.72411	2.31128e-06	5.48442e-05	no
WBGene00000722	12053.3	1.05093	0.347797	3.02166	0.00251393	0.0202249	yes
WBGene00000726	947.684	-1.2027	0.220265	-5.46022	4.75535e-08	1.75881e-06	no
WBGene00000729	14099	-1.88625	0.236704	-7.96882	1.60196e-15	2.05207e-13	no
WBGene00000730	11443.3	-1.11167	0.227472	-4.88706	1.02352e-06	2.68775e-05	no
WBGene00000731	77.2473	1.97137	0.348272	5.66043	1.50996e-08	6.41266e-07	no
WBGene00000733	40026.5	0.841305	0.226961	3.70682	0.000209874	0.00271939	no
WBGene00000734	20531.2	-1.16996	0.202066	-5.78998	7.03935e-09	3.20555e-07	no
WBGene00000735	11018.8	-2.52031	0.193201	-13.045	6.78731e-39	4.6496e-36	no
WBGene00000739	87534.8	0.608663	0.125632	4.84482	1.26727e-06	3.22781e-05	no
WBGene00000749	7616.06	1.3414	0.358547	3.74122	0.000183133	0.00243908	no
WBGene00000753	21593.1	-1.24467	0.146436	-8.49975	1.89993e-17	3.25384e-15	no
WBGene00000759	534.298	-1.14263	0.135844	-8.41131	4.05474e-17	6.72489e-15	no
WBGene00000770	886.461	1.18881	0.224868	5.28669	1.2455e-07	4.19318e-06	no
WBGene00000784	11547.7	-0.911238	0.211733	-4.30371	1.67959e-05	0.000311337	no
WBGene00000786	23898	-0.674785	0.23326	-2.89285	0.00381766	0.0282532	no
WBGene00000799	387.836	-0.918278	0.162608	-5.6472	1.63078e-08	6.74398e-07	no
WBGene00000853	181.421	-0.740612	0.272981	-2.71305	0.00666661	0.0436209	no
WBGene00000901	1918.53	0.667287	0.149453	4.46486	8.01223e-06	0.000160816	no
WBGene00000929	2574.52	-0.701126	0.179925	-3.89676	9.74863e-05	0.0014436	no
WBGene00000960	112.955	0.870007	0.212007	4.10367	4.06643e-05	0.000670896	no
WBGene00000967	4874.23	-0.732347	0.136442	-5.36745	7.98568e-08	2.79353e-06	no
WBGene00000971	141.717	-0.826474	0.221083	-3.7383	0.000185265	0.00246125	no
WBGene00000972	49.294	-0.773903	0.264755	-2.92309	0.00346575	0.0260743	no
WBGene00000977	539.978	-0.672545	0.191441	-3.51306	0.000442977	0.00506866	no
WBGene00000993	915.581	-1.60593	0.101326	-15.8492	1.42371e-56	1.86933e-53	no
WBGene00001063	6135.27	-0.974436	0.269849	-3.61105	0.000304962	0.00373347	no
WBGene00001066	116835	-0.74476	0.270164	-2.75669	0.00583891	0.0394164	no
WBGene00001067	88372.4	-0.809346	0.252905	-3.2002	0.00137331	0.0127895	no
WBGene00001074	118546	-0.786148	0.258077	-3.04617	0.00231774	0.0190398	no
WBGene00001133	63.1275	0.738885	0.244999	3.01587	0.00256246	0.0205675	no
WBGene00001243	10542.1	-0.610587	0.183409	-3.3291	0.000871262	0.00878286	no
WBGene00001247	1422.13	-0.768786	0.154313	-4.98199	6.29348e-07	1.76756e-05	no
WBGene00001387	315.692	2.43858	0.239779	10.1701	2.69583e-24	8.49509e-22	no
WBGene00001399	6881.34	-0.668174	0.240185	-2.78191	0.00540397	0.0372227	no
WBGene00001414	193.391	1.57467	0.300387	5.24213	1.58732e-07	5.23217e-06	no
WBGene00001429	2404.44	-0.622034	0.12399	-5.01682	5.25343e-07	1.50496e-05	no
WBGene00001439	1433.34	0.800701	0.122889	6.51567	7.23681e-11	4.69231e-09	no
WBGene00001478	2067.76	1.70614	0.229475	7.43496	1.04598e-13	1.04728e-11	no
WBGene00001479	4051.25	-0.78758	0.250959	-3.13829	0.00169938	0.0150255	no
WBGene00001481	1327.74	0.763177	0.238123	3.20497	0.00135077	0.0126232	no
WBGene00001496	1741.77	0.591516	0.129214	4.5778	4.69902e-06	0.000102687	no
WBGene00001508	1408.7	-0.655506	0.125667	-5.21621	1.82624e-07	5.89636e-06	no
WBGene00001532	35.4235	1.02854	0.276131	3.72482	0.000195451	0.00256413	no
WBGene00001575	74.1775	-0.988435	0.218473	-4.52429	6.05996e-06	0.000128162	no
WBGene00001577	116.652	0.688206	0.216613	3.17712	0.00148746	0.0135996	no
WBGene00001592	321.428	0.738718	0.222835	3.31509	0.000916132	0.00914159	no
WBGene00001626	17.5793	0.885169	0.324572	2.72719	0.00638763	0.0421102	no
WBGene00001678	980.054	0.696515	0.144575	4.81767	1.45245e-06	3.61529e-05	no
WBGene00001692	2461.9	1.02716	0.242524	4.2353	2.28247e-05	0.000406358	no
WBGene00001694	9308.06	-0.773141	0.198796	-3.88911	0.000100611	0.00148568	no
WBGene00001695	7073.74	-1.42454	0.210131	-6.7793	1.2076e-11	8.97498e-10	no
WBGene00001696	30.6304	1.23897	0.29533	4.19519	2.72641e-05	0.000473098	no
WBGene00001699	5365.56	0.774068	0.220538	3.5099	0.000448268	0.00511065	no
WBGene00001700	151.696	-2.38814	0.305567	-7.81544	5.4772e-15	6.58769e-13	no
WBGene00001702	4756.27	0.671558	0.218364	3.07541	0.00210213	0.0177308	no
WBGene00001703	7618.7	-0.927803	0.231572	-4.00654	6.16147e-05	0.00097568	no
WBGene00001713	19103.9	1.07944	0.220155	4.90308	9.43476e-07	2.5153e-05	no
WBGene00001724	2867.89	-0.960706	0.276471	-3.47488	0.000511074	0.00565881	no
WBGene00001725	42275.2	-0.848942	0.243058	-3.49275	0.000478068	0.00536117	no
WBGene00001726	41.197	1.24822	0.299445	4.16845	3.06683e-05	0.000523521	no
WBGene00001731	160.534	0.758814	0.229719	3.30322	0.000955808	0.00946556	no
WBGene00001758	1796.78	-1.33684	0.1847	-7.23792	4.55628e-13	3.98827e-11	no
WBGene00001761	2119.3	-0.74271	0.138695	-5.35498	8.55648e-08	2.95649e-06	no
WBGene00001763	49.5696	0.759747	0.264628	2.871	0.0040917	0.0298605	no
WBGene00001768	1112.16	0.902537	0.233937	3.85804	0.000114299	0.00165219	no
WBGene00001774	2322.89	-0.643874	0.106738	-6.0323	1.61641e-09	8.26888e-08	no
WBGene00001786	288.99	1.47538	0.170931	8.63144	6.0585e-18	1.10997e-15	no
WBGene00001789	133.109	1.00141	0.313599	3.19328	0.00140666	0.0130219	no
WBGene00001816	466.529	1.23587	0.174445	7.08458	1.39469e-12	1.16268e-10	no
WBGene00001821	155.192	0.72685	0.207367	3.50514	0.000456359	0.00517667	no
WBGene00001854	3579.95	0.652197	0.225409	2.8934	0.003811	0.0282172	no
WBGene00001906	234.051	0.597835	0.21798	2.74262	0.00609516	0.0405897	no
WBGene00001933	341.812	0.694238	0.252617	2.74819	0.00599258	0.040076	no
WBGene00001937	30.0214	0.893557	0.332823	2.68478	0.00725767	0.0465602	no
WBGene00001942	87.716	0.611253	0.206091	2.96593	0.00301766	0.0233528	no
WBGene00001944	37.2996	1.10114	0.345849	3.18388	0.00145317	0.0133583	no
WBGene00001984	1060.41	-0.605756	0.203911	-2.97068	0.00297137	0.0230852	no
WBGene00002008	12950.1	0.673172	0.126328	5.32876	9.88849e-08	3.36508e-06	no
WBGene00002012	116.93	-1.33316	0.209419	-6.36597	1.94064e-10	1.09988e-08	no
WBGene00002024	1896.16	1.31719	0.166896	7.89227	2.96751e-15	3.65282e-13	no
WBGene00002051	56.976	-1.33757	0.269422	-4.96459	6.88474e-07	1.91316e-05	no
WBGene00002087	153.858	1.47638	0.200913	7.34838	2.00627e-13	1.90426e-11	no
WBGene00002095	81.8017	-0.816349	0.243779	-3.34873	0.00081184	0.00832304	no
WBGene00002118	436.823	-0.969587	0.157195	-6.16807	6.91296e-10	3.70478e-08	no
WBGene00002131	203.785	-1.01228	0.195326	-5.1825	2.18933e-07	6.89901e-06	no
WBGene00002188	152.438	1.2516	0.219443	5.70352	1.17361e-08	5.09404e-07	no
WBGene00002195	170.576	0.618489	0.182827	3.38293	0.00071718	0.00752323	no
WBGene00002206	31.2159	1.05452	0.354222	2.977	0.00291086	0.0226935	no
WBGene00002257	2045.3	-0.59104	0.163342	-3.61842	0.000296405	0.00366574	no
WBGene00002260	36.7918	-1.58784	0.286518	-5.54185	2.99299e-08	1.16152e-06	no
WBGene00002981	1377.8	0.796532	0.123725	6.4379	1.21136e-10	7.22964e-09	no
WBGene00002990	1087.68	0.602606	0.196465	3.06724	0.00216042	0.0180677	no
WBGene00003019	1096.5	0.73922	0.166521	4.43921	9.02892e-06	0.000178943	no
WBGene00003057	9708.94	-1.63277	0.252815	-6.45836	1.05841e-10	6.43873e-09	no
WBGene00003075	760.08	-0.70558	0.233321	-3.02407	0.00249399	0.020106	no
WBGene00003089	1862.14	-0.617463	0.192115	-3.21402	0.00130889	0.0123049	no
WBGene00003093	18770	-0.941588	0.156137	-6.03051	1.63442e-09	8.33394e-08	no
WBGene00003094	157.166	-0.810558	0.22455	-3.6097	0.000306557	0.00374718	no
WBGene00003095	233.159	-1.53944	0.212093	-7.25833	3.91886e-13	3.48845e-11	no
WBGene00003099	79.8967	1.29132	0.286083	4.51379	6.36792e-06	0.000133777	no
WBGene00003104	2269.97	-1.21243	0.250823	-4.83382	1.33939e-06	3.37116e-05	no
WBGene00003163	2606.78	0.801887	0.174208	4.60303	4.16378e-06	9.24309e-05	no
WBGene00003248	666.993	-0.638541	0.161893	-3.94423	8.00575e-05	0.00121873	no
WBGene00003388	2746.69	-0.867876	0.249568	-3.47751	0.0005061	0.00562349	yes
WBGene00003474	504.934	-1.32197	0.233622	-5.65858	1.52627e-08	6.42992e-07	no
WBGene00003528	1154.19	1.62178	0.266486	6.08578	1.15927e-09	6.0282e-08	no
WBGene00003530	3017.16	1.02299	0.126392	8.0938	5.78307e-16	7.99281e-14	no
WBGene00003531	377.001	-0.631977	0.231429	-2.73077	0.00631871	0.0417432	no
WBGene00003532	323.137	-0.810332	0.205705	-3.93928	8.1726e-05	0.00124053	yes
WBGene00003542	897.779	-1.55638	0.216695	-7.18236	6.85158e-13	5.93151e-11	no
WBGene00003545	352.569	-1.56025	0.236967	-6.58427	4.57122e-11	3.06486e-09	no
WBGene00003547	835.895	-0.650535	0.188805	-3.44554	0.00056992	0.0062057	no
WBGene00003551	287.369	1.41332	0.215249	6.56595	5.17018e-11	3.42275e-09	no
WBGene00003552	2006.7	-1.50494	0.196813	-7.64655	2.06437e-14	2.3233e-12	no
WBGene00003553	4668.81	-1.04056	0.243242	-4.27789	1.88676e-05	0.00034487	no
WBGene00003554	5425.4	1.66945	0.197866	8.43729	3.24769e-17	5.44368e-15	no
WBGene00003573	248.047	0.757663	0.168953	4.48447	7.30962e-06	0.000149184	no
WBGene00003574	35.3236	1.35765	0.309884	4.38117	1.18043e-05	0.000226539	no
WBGene00003575	55.9457	0.913481	0.301787	3.02691	0.00247071	0.0200044	no
WBGene00003588	6596.97	0.758058	0.10969	6.91093	4.81478e-12	3.73703e-10	no
WBGene00003589	3350.26	0.877687	0.11611	7.55913	4.05785e-14	4.40935e-12	no
WBGene00003604	430.534	0.711314	0.146221	4.86465	1.14657e-06	2.95668e-05	no
WBGene00003606	375.023	0.948456	0.191458	4.95385	7.27587e-07	2.01474e-05	no
WBGene00003607	3682.54	-0.719426	0.208829	-3.44505	0.000570949	0.00621262	no
WBGene00003610	459.442	0.781065	0.219262	3.56224	0.000367698	0.00434943	no
WBGene00003618	484.533	0.993147	0.18307	5.42497	5.79645e-08	2.09951e-06	yes
WBGene00003622	1634.55	0.613232	0.168869	3.6314	0.000281884	0.00350818	yes
WBGene00003640	374.617	0.749315	0.142925	5.24271	1.58232e-07	5.22664e-06	yes
WBGene00003653	206.544	0.766292	0.171775	4.46103	8.15669e-06	0.000163421	no
WBGene00003655	520.609	0.651897	0.117744	5.53658	3.08435e-08	1.19111e-06	no
WBGene00003664	383.719	-1.17967	0.26389	-4.4703	7.81102e-06	0.000157379	no
WBGene00003669	645.158	0.854353	0.150948	5.65992	1.51441e-08	6.41425e-07	no
WBGene00003680	345.638	0.633457	0.153361	4.13051	3.61963e-05	0.000605656	no
WBGene00003704	11554.8	-0.58961	0.177776	-3.31658	0.000911252	0.00909866	no
WBGene00003705	377.758	0.818947	0.148981	5.49699	3.86339e-08	1.44932e-06	no
WBGene00003729	424.457	0.656579	0.2138	3.07099	0.00213349	0.0179186	no
WBGene00003736	1945.01	-0.611757	0.121713	-5.02622	5.0025e-07	1.44358e-05	no
WBGene00003740	31.5904	0.897818	0.288872	3.10801	0.00188349	0.0162529	no
WBGene00003763	521.555	2.10314	0.250654	8.39059	4.83711e-17	7.65441e-15	no
WBGene00003764	559.406	0.691861	0.251306	2.75307	0.005904	0.0396688	no
WBGene00003765	3101.16	1.4751	0.259152	5.69203	1.2554e-08	5.4192e-07	no
WBGene00003766	207.043	1.41672	0.270517	5.23706	1.63151e-07	5.34428e-06	no
WBGene00003767	4772.93	2.05202	0.345842	5.93341	2.96708e-09	1.44288e-07	no
WBGene00003768	2122.61	2.06057	0.206918	9.95839	2.3178e-23	6.89042e-21	no
WBGene00003769	2824.65	1.92242	0.2241	8.57839	9.62113e-18	1.72262e-15	no
WBGene00003847	2662.35	-0.984025	0.122574	-8.028	9.90717e-16	1.31174e-13	yes
WBGene00003861	228.302	0.712011	0.256479	2.77609	0.00550163	0.0376278	no
WBGene00003862	126.838	0.879337	0.251266	3.49962	0.000465924	0.00525866	no
WBGene00003884	165.126	0.792917	0.172737	4.59032	4.42564e-06	9.7253e-05	no
WBGene00003891	17502.6	0.734714	0.11458	6.41226	1.43379e-10	8.36695e-09	no
WBGene00003957	3388.2	-0.625565	0.0853089	-7.33294	2.25157e-13	2.09915e-11	no
WBGene00003958	7102.65	-0.593628	0.120941	-4.90842	9.1813e-07	2.45604e-05	no
WBGene00003995	2716.34	-0.658606	0.20943	-3.14475	0.00166228	0.0148222	no
WBGene00003996	3283.82	-0.651839	0.175408	-3.71613	0.000202294	0.00263853	no
WBGene00004003	5534.95	2.17993	0.121389	17.9583	4.13352e-72	9.30397e-69	no
WBGene00004004	1389.51	0.971786	0.225189	4.31543	1.5929e-05	0.000296663	no
WBGene00004007	298.197	-0.608759	0.136466	-4.46087	8.16274e-06	0.000163421	no
WBGene00004008	4511.29	0.631897	0.132487	4.76951	1.84675e-06	4.45595e-05	no
WBGene00004052	66.0657	0.956255	0.299222	3.19581	0.00139441	0.0129372	no
WBGene00004096	1580.83	0.774348	0.146273	5.29385	1.1977e-07	4.04091e-06	yes
WBGene00004119	1381.1	0.948195	0.297606	3.18608	0.00144215	0.0132803	no
WBGene00004127	4767.54	-1.15724	0.272674	-4.24405	2.19518e-05	0.000393485	no
WBGene00004133	5377.44	-0.805436	0.255647	-3.15058	0.00162949	0.0146125	no
WBGene00004144	177.597	1.27331	0.263603	4.8304	1.3626e-06	3.41321e-05	no
WBGene00004153	526.597	1.19786	0.229442	5.22074	1.78209e-07	5.77748e-06	no
WBGene00004157	292.725	0.966837	0.287715	3.3604	0.00077829	0.00803587	no
WBGene00004172	1545.98	0.951247	0.140987	6.74706	1.50871e-11	1.09545e-09	no
WBGene00004173	1978.98	1.06437	0.244483	4.35357	1.3394e-05	0.00025304	no
WBGene00004216	2573.42	-0.729989	0.217203	-3.36085	0.000777019	0.00802801	yes
WBGene00004218	1028.91	-0.668912	0.202963	-3.29574	0.000981625	0.00967528	no
WBGene00004219	6709.1	-0.68756	0.236656	-2.90532	0.00366877	0.0273698	yes
WBGene00004222	2948.42	1.21289	0.24962	4.85893	1.18022e-06	3.02366e-05	no
WBGene00004225	3210.74	-0.689272	0.209408	-3.29153	0.000996436	0.00980015	no
WBGene00004229	649.476	-0.657665	0.220151	-2.98734	0.00281421	0.0220584	no
WBGene00004230	2912.34	-0.735858	0.267126	-2.75472	0.00587418	0.0395022	no
WBGene00004231	507.142	-0.714425	0.223624	-3.19476	0.00139949	0.0129708	no
WBGene00004236	127.745	1.35134	0.236128	5.7229	1.04723e-08	4.62188e-07	no
WBGene00004309	437.726	-0.912719	0.146632	-6.22458	4.82857e-10	2.64163e-08	no
WBGene00004356	1464.62	0.845311	0.121207	6.97411	3.07811e-12	2.40093e-10	no
WBGene00004509	484.459	0.667694	0.13779	4.84575	1.26135e-06	3.22105e-05	no
WBGene00004747	1589.51	0.935929	0.206217	4.53856	5.66407e-06	0.000121419	no
WBGene00004798	1782.66	1.05248	0.206395	5.09934	3.40846e-07	1.02684e-05	no
WBGene00004902	3773.55	0.76202	0.13224	5.76242	8.2916e-09	3.72201e-07	yes
WBGene00004932	92.3285	-1.02695	0.225939	-4.54525	5.48692e-06	0.000118427	no
WBGene00004963	52.3117	0.803211	0.268851	2.98757	0.00281205	0.0220541	no
WBGene00004987	632.112	-1.03279	0.225935	-4.57118	4.84995e-06	0.000105667	no
WBGene00004989	1114.72	-1.47536	0.125706	-11.7366	8.2743e-32	4.34566e-29	no
WBGene00004990	14390.5	-0.729986	0.145436	-5.01928	5.18649e-07	1.48849e-05	no
WBGene00004998	1213.34	-1.06117	0.235904	-4.49829	6.85027e-06	0.000141273	no
WBGene00005008	328.606	-0.725275	0.143862	-5.04147	4.61981e-07	1.35046e-05	no
WBGene00005092	140.249	1.4131	0.278247	5.07858	3.80265e-07	1.14123e-05	no
WBGene00005153	1582.31	-0.693507	0.162346	-4.27179	1.9391e-05	0.000352539	no
WBGene00005444	571.17	-0.593543	0.149663	-3.96587	7.31296e-05	0.00112523	no
WBGene00005552	31.7026	-1.00474	0.319869	-3.1411	0.00168312	0.0149333	no
WBGene00005648	4730.51	0.596682	0.132371	4.50763	6.55543e-06	0.000136624	no
WBGene00005657	35.8963	0.791867	0.268737	2.94663	0.00321262	0.0245124	no
WBGene00005698	38.4892	0.84765	0.289511	2.92787	0.00341296	0.0257541	no
WBGene00005713	44.8531	-0.95873	0.281379	-3.40726	0.000656186	0.00697287	no
WBGene00005833	25.3039	1.44723	0.317861	4.55302	5.28812e-06	0.00011445	no
WBGene00005949	153.007	-1.33853	0.200566	-6.67378	2.49293e-11	1.75351e-09	no
WBGene00006193	55.3395	-1.21757	0.328312	-3.70857	0.000208433	0.00270516	no
WBGene00006212	77.7893	-0.932267	0.243765	-3.82446	0.000131061	0.00185534	no
WBGene00006220	393.336	0.858609	0.281678	3.0482	0.00230219	0.0189615	no
WBGene00006331	6723.18	0.739403	0.146898	5.03344	4.81755e-07	1.39789e-05	yes
WBGene00006372	642.421	0.664604	0.120715	5.50557	3.67972e-08	1.38371e-06	no
WBGene00006416	186.821	0.948241	0.309079	3.06795	0.00215531	0.0180371	no
WBGene00006487	166.331	-0.6376	0.23718	-2.68826	0.00718263	0.0462861	no
WBGene00006509	61.267	-0.64986	0.243949	-2.66391	0.00772378	0.0488803	no
WBGene00006533	817.284	1.46202	0.174253	8.39019	4.85347e-17	7.65441e-15	no
WBGene00006534	520.908	-1.14344	0.305757	-3.73969	0.000184247	0.00245185	no
WBGene00006539	333.48	0.614637	0.125491	4.89787	9.68794e-07	2.57408e-05	no
WBGene00006541	107.705	-0.888994	0.329219	-2.70031	0.00692748	0.0450286	no
WBGene00006598	38.138	-1.4268	0.30751	-4.63986	3.48645e-06	7.92677e-05	no
WBGene00006602	2510.32	0.690157	0.121832	5.66483	1.47173e-08	6.2672e-07	no
WBGene00006611	222.643	-1.21238	0.216249	-5.60642	2.0656e-08	8.21858e-07	no
WBGene00006621	93.0243	-0.803928	0.205385	-3.91424	9.06885e-05	0.00135955	no
WBGene00006622	121.353	-1.90965	0.217407	-8.78374	1.58124e-18	3.11426e-16	no
WBGene00006636	634.087	-0.755869	0.139592	-5.41485	6.13412e-08	2.21672e-06	no
WBGene00006649	1215.48	0.724669	0.129064	5.61479	1.96806e-08	7.92927e-07	yes
WBGene00006650	643.212	2.82284	0.250858	11.2527	2.24561e-29	9.8283e-27	no
WBGene00006651	3244.51	-0.963914	0.195557	-4.92906	8.26278e-07	2.2563e-05	no
WBGene00006660	180.09	0.742806	0.276721	2.68431	0.00726795	0.0466072	no
WBGene00006665	76.818	-0.794877	0.224849	-3.53515	0.000407537	0.00472491	no
WBGene00006732	1960.34	-0.845966	0.111316	-7.59966	2.96905e-14	3.29439e-12	no
WBGene00006861	3100.31	0.6042	0.173132	3.48982	0.000483353	0.00540889	yes
WBGene00006886	1057.3	-0.614799	0.114171	-5.3849	7.2483e-08	2.57217e-06	no
WBGene00006897	169.687	-1.5489	0.191027	-8.10829	5.13363e-16	7.22192e-14	no
WBGene00006923	2989.88	0.645996	0.173344	3.72668	0.000194018	0.00254923	yes
WBGene00006925	1468.14	-1.24561	0.359668	-3.46323	0.000533733	0.00584919	no
WBGene00006927	569.142	-1.14819	0.350139	-3.27925	0.00104084	0.0101419	no
WBGene00006928	498.243	-1.31533	0.356061	-3.69411	0.000220654	0.00284736	no
WBGene00006929	2083.57	-1.05294	0.348213	-3.02384	0.00249587	0.020106	no
WBGene00006947	4275.83	-0.90422	0.272885	-3.31356	0.000921155	0.00918009	yes
WBGene00006948	2996.03	-1.85579	0.274	-6.77295	1.26184e-11	9.33403e-10	yes
WBGene00006950	3527.12	-1.58794	0.27797	-5.71262	1.11248e-08	4.86895e-07	no
WBGene00006952	2011.05	-0.885483	0.21719	-4.077	4.56205e-05	0.000742435	no
WBGene00006954	984.8	-2.15151	0.256349	-8.3929	4.74292e-17	7.65441e-15	no
WBGene00006981	639.619	2.07549	0.153258	13.5424	8.78587e-42	6.59191e-39	no
WBGene00007072	736.808	-0.650008	0.175041	-3.71346	0.000204443	0.00266435	no
WBGene00007073	1055.1	0.699243	0.207722	3.36625	0.00076198	0.00790893	no
WBGene00007097	139.975	-0.772911	0.263719	-2.93081	0.00338081	0.0255728	no
WBGene00007131	79.3964	2.62327	0.245087	10.7034	9.80742e-27	3.59362e-24	no
WBGene00007141	131.677	-1.07237	0.269295	-3.98214	6.82967e-05	0.00106437	no
WBGene00007142	6043.31	0.760084	0.206649	3.67814	0.00023494	0.00300708	no
WBGene00007143	8864.16	0.705195	0.0864995	8.15259	3.56205e-16	5.10215e-14	no
WBGene00007149	458.534	-0.628678	0.2261	-2.78054	0.00542692	0.0372903	no
WBGene00007152	138.446	-0.703669	0.173752	-4.04985	5.12512e-05	0.000823153	no
WBGene00007169	115.2	1.52799	0.317305	4.81552	1.46816e-06	3.64288e-05	no
WBGene00007177	876.438	-0.777424	0.275557	-2.82128	0.00478326	0.0336451	no
WBGene00007203	194.238	1.30734	0.183583	7.12123	1.0697e-12	9.06139e-11	no
WBGene00007220	647.881	-0.606838	0.16746	-3.62379	0.000290319	0.00360746	no
WBGene00007231	103.106	1.31435	0.349846	3.75694	0.000172001	0.00231711	no
WBGene00007232	98.8292	1.47964	0.339189	4.36227	1.2872e-05	0.000244057	no
WBGene00007251	340.154	-0.701844	0.215422	-3.25799	0.00112204	0.010793	no
WBGene00007288	24.2784	1.58113	0.336449	4.69946	2.60853e-06	6.08889e-05	no
WBGene00007331	9954.82	-0.959692	0.111895	-8.57669	9.76409e-18	1.72857e-15	no
WBGene00007344	2364.87	-1.39527	0.231976	-6.0147	1.80219e-09	9.10107e-08	no
WBGene00007356	79.207	-0.614169	0.223731	-2.74512	0.00604887	0.040401	no
WBGene00007362	1965.45	-1.20522	0.20443	-5.89554	3.73458e-09	1.78309e-07	no
WBGene00007365	258.027	2.00501	0.261264	7.67429	1.66333e-14	1.91295e-12	no
WBGene00007366	22.2571	1.06385	0.32171	3.30684	0.000943534	0.00936167	no
WBGene00007375	320.063	0.641771	0.153766	4.17368	2.99721e-05	0.000514027	no
WBGene00007391	123.622	0.926739	0.25854	3.58451	0.000337712	0.00405254	no
WBGene00007397	325.677	-0.795033	0.135625	-5.86198	4.5737e-09	2.13205e-07	no
WBGene00007405	571.687	0.906177	0.140223	6.46242	1.03044e-10	6.29289e-09	yes
WBGene00007407	30.372	1.09804	0.348574	3.15011	0.00163211	0.0146277	no
WBGene00007415	30.8613	1.09829	0.345583	3.17807	0.00148257	0.0135666	no
WBGene00007420	426.215	-1.21492	0.227431	-5.34191	9.19741e-08	3.14348e-06	no
WBGene00007440	246.105	1.72331	0.201498	8.55247	1.20478e-17	2.10917e-15	no
WBGene00007446	26.8315	1.02635	0.341019	3.00966	0.00261544	0.0209076	no
WBGene00007450	196.464	0.64548	0.205079	3.14746	0.00164693	0.0147187	no
WBGene00007453	84.32	0.91406	0.217121	4.2099	2.5548e-05	0.000445774	no
WBGene00007461	21.9136	1.33114	0.344571	3.86319	0.000111915	0.0016267	no
WBGene00007467	32.1108	0.827298	0.289533	2.85735	0.0042719	0.0308894	no
WBGene00007474	1228.13	0.705134	0.196276	3.59256	0.000327442	0.00394734	no
WBGene00007480	671.348	0.861257	0.113313	7.60066	2.94615e-14	3.29216e-12	no
WBGene00007506	171.026	1.32193	0.243655	5.42541	5.78217e-08	2.09917e-06	no
WBGene00007517	355.208	0.730832	0.246918	2.95982	0.0030782	0.0236932	no
WBGene00007533	804.198	-0.699793	0.184494	-3.79304	0.000148812	0.00204955	no
WBGene00007552	918.737	-0.985683	0.172438	-5.71617	1.08955e-08	4.79523e-07	yes
WBGene00007553	217.091	0.636298	0.231379	2.75003	0.00595904	0.0399219	no
WBGene00007560	1365.52	-1.18987	0.259245	-4.58976	4.43753e-06	9.73784e-05	no
WBGene00007574	692.602	0.671355	0.161132	4.16649	3.09331e-05	0.000527469	no
WBGene00007599	731.407	2.33554	0.265041	8.81197	1.22965e-18	2.45245e-16	no
WBGene00007600	2136.51	-0.857704	0.223507	-3.83748	0.000124302	0.00177303	no
WBGene00007660	99.4598	1.61039	0.247509	6.50641	7.69683e-11	4.88997e-09	no
WBGene00007691	213.305	0.953326	0.171332	5.56419	2.63375e-08	1.03227e-06	no
WBGene00007692	581.344	-1.52531	0.142624	-10.6946	1.07865e-26	3.86255e-24	no
WBGene00007694	168.502	0.872366	0.16131	5.40802	6.37253e-08	2.29236e-06	no
WBGene00007716	79.8521	0.892557	0.262014	3.40652	0.000657962	0.00698575	no
WBGene00007728	135.574	-0.695813	0.219984	-3.16302	0.0015614	0.0141063	no
WBGene00007732	216.972	0.78799	0.234251	3.36388	0.000768562	0.00795106	no
WBGene00007765	224.737	4.06686	0.265798	15.3006	7.58076e-53	8.5316e-50	no
WBGene00007778	132.185	1.15093	0.249211	4.61831	3.86882e-06	8.68335e-05	no
WBGene00007806	1000.29	-2.14918	0.239334	-8.97982	2.712e-19	5.85346e-17	no
WBGene00007811	2944.48	-0.652775	0.11347	-5.75284	8.77564e-09	3.91697e-07	no
WBGene00007816	321.28	0.952007	0.235559	4.04149	5.31134e-05	0.000849599	no
WBGene00007817	806.242	0.754773	0.256336	2.94446	0.00323514	0.0246603	no
WBGene00007823	836.783	-2.64279	0.216215	-12.223	2.34341e-34	1.36751e-31	yes
WBGene00007836	13806.2	-0.71801	0.248945	-2.88421	0.00392394	0.0288971	no
WBGene00007866	18.0284	-0.917913	0.325276	-2.82195	0.00477319	0.0336043	no
WBGene00007868	709.873	-0.759936	0.273948	-2.77401	0.00553694	0.0378317	no
WBGene00007869	154.327	-1.27324	0.225868	-5.6371	1.72935e-08	7.09573e-07	no
WBGene00007875	1040.42	-1.52643	0.174896	-8.72763	2.60068e-18	4.9369e-16	no
WBGene00007878	313.707	0.63954	0.171586	3.72723	0.000193592	0.00254611	no
WBGene00007890	169.188	1.20795	0.267935	4.50837	6.53278e-06	0.000136332	no
WBGene00007898	1584.24	0.61647	0.118513	5.20172	1.97454e-07	6.29774e-06	no
WBGene00007903	4159.75	-0.709215	0.223881	-3.16782	0.00153584	0.0139073	yes
WBGene00007916	1014.05	-0.681043	0.20646	-3.29866	0.000971464	0.00959047	no
WBGene00007926	801.585	-0.795566	0.181279	-4.38862	1.14073e-05	0.000220262	no
WBGene00007929	41.0045	0.751531	0.262253	2.86567	0.00416122	0.0302279	no
WBGene00007937	35.5198	-0.868119	0.290364	-2.98976	0.00279194	0.0219291	no
WBGene00007946	100.058	-0.782898	0.228236	-3.43022	0.000603095	0.00650402	no
WBGene00007947	759.348	-0.656759	0.185731	-3.53608	0.000406117	0.00471192	no
WBGene00007949	113.798	-1.11338	0.312516	-3.56265	0.000367133	0.00434601	no
WBGene00007963	85.0887	-1.15089	0.261128	-4.40737	1.04631e-05	0.000204283	no
WBGene00008007	57.5103	1.34669	0.305777	4.40414	1.06203e-05	0.00020684	no
WBGene00008010	85.1667	1.50694	0.225129	6.69367	2.17641e-11	1.5587e-09	no
WBGene00008032	6217.05	0.719644	0.218766	3.28956	0.00100346	0.00985077	no
WBGene00008033	449.446	0.635234	0.152375	4.16888	3.06096e-05	0.000523085	no
WBGene00008092	21.1691	1.11567	0.347705	3.20866	0.00133354	0.0125067	no
WBGene00008100	693.782	0.649056	0.1646	3.94322	8.03946e-05	0.00122268	no
WBGene00008123	1473.06	-0.606182	0.11999	-5.05194	4.37339e-07	1.28319e-05	no
WBGene00008150	2055.92	-0.707536	0.251755	-2.81041	0.00494781	0.034595	no
WBGene00008152	80.1783	-0.746291	0.231336	-3.226	0.00125532	0.0118863	no
WBGene00008167	3747.69	-0.710677	0.155037	-4.58391	4.56357e-06	0.000100005	no
WBGene00008186	17.6217	1.09885	0.336279	3.26767	0.00108438	0.0104948	no
WBGene00008211	591.224	0.811451	0.293915	2.76084	0.0057653	0.0390366	no
WBGene00008215	5169.57	-0.606146	0.176291	-3.43834	0.000585298	0.00635559	no
WBGene00008222	93.4525	-0.792219	0.263858	-3.00245	0.00267817	0.0212474	no
WBGene00008234	34.0476	0.96938	0.292199	3.31754	0.000908149	0.00907919	no
WBGene00008260	2442.55	-0.824338	0.181809	-4.5341	5.78506e-06	0.000123342	no
WBGene00008284	1939.24	0.785522	0.230833	3.40299	0.000666535	0.00705775	no
WBGene00008290	219.494	-1.44795	0.249796	-5.79652	6.77041e-09	3.10101e-07	no
WBGene00008292	128.54	-1.84551	0.283618	-6.50704	7.66468e-11	4.88926e-09	no
WBGene00008296	2036.26	1.46897	0.1599	9.1868	4.04694e-20	9.377e-18	no
WBGene00008304	601.473	1.4122	0.28895	4.88735	1.02203e-06	2.68775e-05	no
WBGene00008320	611.238	0.72755	0.183332	3.96849	7.2329e-05	0.00111548	no
WBGene00008336	118.327	-0.619893	0.216753	-2.8599	0.00423773	0.0306987	no
WBGene00008341	2081.9	-1.1098	0.151582	-7.32149	2.45237e-13	2.25962e-11	no
WBGene00008342	171.014	-0.78757	0.238301	-3.30494	0.00094996	0.00941357	no
WBGene00008357	110.284	-0.818797	0.190813	-4.2911	1.77788e-05	0.000327247	no
WBGene00008368	403.309	0.688182	0.195571	3.51883	0.00043346	0.00496698	no
WBGene00008375	1159.07	-0.775158	0.15853	-4.88966	1.01009e-06	2.66583e-05	no
WBGene00008448	2599.06	0.621142	0.218862	2.83805	0.00453901	0.0323312	no
WBGene00008451	336.055	-0.944254	0.158504	-5.95729	2.56454e-09	1.25487e-07	no
WBGene00008462	45.1282	-1.87031	0.291884	-6.40773	1.47704e-10	8.56338e-09	no
WBGene00008476	479.083	0.852564	0.15937	5.34961	8.81453e-08	3.03585e-06	no
WBGene00008477	237.141	1.85505	0.258629	7.17263	7.35706e-13	6.33431e-11	no
WBGene00008490	160.379	1.41519	0.269094	5.2591	1.44766e-07	4.83248e-06	no
WBGene00008500	905.594	-0.737304	0.263657	-2.79645	0.00516678	0.0358309	no
WBGene00008508	53.9964	1.09419	0.326596	3.35028	0.000807288	0.008291	no
WBGene00008511	370.308	-0.78194	0.172919	-4.52199	6.12597e-06	0.000129211	no
WBGene00008516	28.3814	0.823615	0.307305	2.68012	0.0073595	0.047003	no
WBGene00008519	250.523	1.78843	0.19149	9.33955	9.67468e-21	2.30961e-18	no
WBGene00008522	340.161	0.793514	0.203075	3.90749	9.32587e-05	0.00139278	no
WBGene00008538	103.466	-0.901238	0.198626	-4.53736	5.69637e-06	0.000121946	no
WBGene00008553	312.939	-0.595155	0.139095	-4.27877	1.87931e-05	0.000343906	no
WBGene00008554	678.9	-0.588622	0.131743	-4.46796	7.89703e-06	0.000158909	no
WBGene00008559	1558.94	-0.677915	0.215091	-3.15176	0.0016229	0.01457	no
WBGene00008560	2088.72	-0.899554	0.103202	-8.71646	2.87041e-18	5.38407e-16	no
WBGene00008565	6936.17	-1.65263	0.225554	-7.32698	2.35393e-13	2.18168e-11	no
WBGene00008572	4703.37	0.75143	0.0837481	8.97251	2.89846e-19	6.17136e-17	no
WBGene00008577	62.2193	-0.902365	0.227004	-3.9751	7.03482e-05	0.00109203	no
WBGene00008583	1324.95	-1.14577	0.142965	-8.01437	1.10702e-15	1.45352e-13	no
WBGene00008593	101.666	-1.23651	0.248614	-4.9736	6.57195e-07	1.83595e-05	no
WBGene00008594	964.292	-0.825339	0.155401	-5.31103	1.09009e-07	3.69364e-06	no
WBGene00008596	204.211	-0.961539	0.191995	-5.00816	5.49531e-07	1.56332e-05	no
WBGene00008616	24.2748	1.36367	0.34092	3.99996	6.3353e-05	0.000999189	no
WBGene00008621	101.438	-1.20971	0.244911	-4.93941	7.83608e-07	2.14722e-05	no
WBGene00008634	555.468	-0.97429	0.149661	-6.50998	7.51602e-11	4.83357e-09	no
WBGene00008654	3502.06	-0.808767	0.188124	-4.29911	1.71488e-05	0.000316732	no
WBGene00008655	2390.07	-2.44021	0.235066	-10.3809	3.02763e-25	1.01497e-22	no
WBGene00008676	52.1427	-1.26883	0.332267	-3.81872	0.000134143	0.00188703	no
WBGene00008707	21540.8	1.26716	0.248146	5.1065	3.28183e-07	9.94396e-06	no
WBGene00008712	252.489	-0.844685	0.223517	-3.77906	0.00015742	0.00214932	no
WBGene00008714	493.198	0.684818	0.128113	5.34541	9.02103e-08	3.0899e-06	no
WBGene00008726	145.71	1.25862	0.228397	5.51067	3.57465e-08	1.35065e-06	no
WBGene00008727	72.2764	-1.10171	0.272184	-4.04765	5.17345e-05	0.000830071	no
WBGene00008730	314.251	-0.661768	0.143093	-4.62476	3.7504e-06	8.4416e-05	no
WBGene00008732	804.109	-1.30665	0.238892	-5.46963	4.50964e-08	1.67186e-06	no
WBGene00008739	1890	3.69748	0.131907	28.0309	6.83004e-173	1.07614e-168	no
WBGene00008777	1466.01	0.811624	0.144691	5.60937	2.03065e-08	8.14119e-07	yes
WBGene00008802	134.421	-0.740787	0.188378	-3.93246	8.40809e-05	0.00127383	no
WBGene00008810	235.659	1.35846	0.210504	6.45338	1.09384e-10	6.60327e-09	no
WBGene00008832	1480.08	-0.656262	0.109581	-5.98886	2.11319e-09	1.04703e-07	no
WBGene00008850	39.2054	1.11577	0.281087	3.96948	7.20291e-05	0.00111264	no
WBGene00008851	4830.51	-0.778063	0.250235	-3.10933	0.00187515	0.0162156	no
WBGene00008861	128.815	0.585249	0.184395	3.1739	0.00150407	0.0137063	no
WBGene00008875	290.338	-0.994284	0.262004	-3.79492	0.000147693	0.00203948	no
WBGene00008886	368.069	0.714276	0.163535	4.36773	1.25542e-05	0.000239472	no
WBGene00008905	222.443	-0.83991	0.167213	-5.02299	5.0873e-07	1.46269e-05	no
WBGene00008916	65.8302	0.718434	0.230829	3.11241	0.00185565	0.0161266	no
WBGene00008922	878.295	0.587259	0.18759	3.13055	0.00174479	0.0153409	no
WBGene00008929	1299.44	-0.816161	0.200622	-4.06816	4.73854e-05	0.000767321	no
WBGene00008936	2635.8	-0.678549	0.141638	-4.79073	1.66176e-06	4.06564e-05	no
WBGene00008954	293.712	-0.744052	0.164065	-4.53511	5.75736e-06	0.000122917	no
WBGene00008964	1458.32	-0.773361	0.260585	-2.96779	0.00299947	0.0232577	no
WBGene00008975	4352.49	0.681164	0.115742	5.88518	3.97617e-09	1.887e-07	no
WBGene00008987	1878.53	-0.609746	0.178576	-3.41449	0.000639019	0.0068214	no
WBGene00008988	114.38	1.10401	0.227003	4.86343	1.15371e-06	2.96652e-05	no
WBGene00009024	81.5332	-1.03577	0.270438	-3.82996	0.000128165	0.00182089	no
WBGene00009047	76.0027	0.860013	0.254568	3.37832	0.000729301	0.00761993	no
WBGene00009048	840.304	0.611888	0.215241	2.8428	0.00447185	0.032012	no
WBGene00009060	178.855	-0.760814	0.167885	-4.53175	5.84978e-06	0.000124553	no
WBGene00009069	922.73	-1.11451	0.211937	-5.2587	1.45076e-07	4.83259e-06	no
WBGene00009079	26.9471	1.0283	0.307534	3.34369	0.000826706	0.00843626	no
WBGene00009094	1975.73	-0.61831	0.205913	-3.00277	0.00267535	0.0212464	no
WBGene00009101	72.9559	0.785411	0.22388	3.50818	0.000451184	0.00513645	no
WBGene00009102	171.955	0.632244	0.213392	2.96283	0.00304826	0.0235318	no
WBGene00009130	198.138	1.64643	0.324931	5.06701	4.04113e-07	1.1991e-05	no
WBGene00009133	2046.07	-1.50597	0.253168	-5.94848	2.70643e-09	1.3202e-07	no
WBGene00009177	3460.64	-1.09526	0.135451	-8.08603	6.16401e-16	8.44524e-14	no
WBGene00009205	546.196	-0.777228	0.216913	-3.58314	0.000339494	0.00406464	no
WBGene00009218	7104.42	-0.815564	0.220291	-3.70222	0.000213721	0.00276469	yes
WBGene00009226	27.9396	1.52937	0.339391	4.50621	6.59973e-06	0.000137259	no
WBGene00009227	40.8139	-1.25255	0.322182	-3.88771	0.000101194	0.0014929	no
WBGene00009229	113.833	-1.06208	0.293756	-3.61552	0.000299749	0.00369839	no
WBGene00009230	25.9743	1.0253	0.316286	3.24169	0.00118824	0.0113328	no
WBGene00009239	72.2513	0.968874	0.296947	3.26278	0.00110325	0.0106272	no
WBGene00009251	97.1904	-0.840399	0.218191	-3.85167	0.000117313	0.00169111	no
WBGene00009261	1093.09	-0.793356	0.267576	-2.96497	0.00302713	0.023403	no
WBGene00009323	703.608	0.649843	0.201515	3.22479	0.00126064	0.0119223	no
WBGene00009328	131.934	-1.02398	0.243366	-4.20758	2.58121e-05	0.000449884	yes
WBGene00009340	2859.04	0.812351	0.21042	3.86061	0.000113103	0.00163861	no
WBGene00009343	64.3664	1.5916	0.296541	5.36721	7.9962e-08	2.79353e-06	no
WBGene00009349	251.245	1.00149	0.214002	4.67982	2.87124e-06	6.67245e-05	no
WBGene00009355	736.519	-1.54608	0.266849	-5.79383	6.87996e-09	3.14205e-07	no
WBGene00009360	176.23	-0.829753	0.228006	-3.63917	0.000273522	0.00341761	no
WBGene00009371	216.28	-0.619839	0.200242	-3.09545	0.00196518	0.0168371	no
WBGene00009380	1162.31	0.61789	0.129857	4.75824	1.95286e-06	4.6833e-05	no
WBGene00009383	556.626	1.15884	0.249568	4.64337	3.42764e-06	7.81561e-05	no
WBGene00009398	804.241	0.892251	0.18156	4.91437	8.90691e-07	2.40303e-05	no
WBGene00009400	150.2	0.995713	0.220819	4.50918	6.50773e-06	0.000136332	no
WBGene00009405	422.595	0.624176	0.174521	3.57651	0.000348215	0.00415327	no
WBGene00009412	22.1668	1.16593	0.351324	3.31867	0.000904472	0.00905391	no
WBGene00009429	1278.96	1.85632	0.27903	6.65278	2.87611e-11	1.98754e-09	no
WBGene00009438	100.487	-1.25203	0.258589	-4.84177	1.28689e-06	3.27037e-05	no
WBGene00009496	71.4189	-1.69446	0.250217	-6.77197	1.27044e-11	9.35373e-10	no
WBGene00009515	826.303	-0.965836	0.126053	-7.66214	1.8286e-14	2.08779e-12	no
WBGene00009517	28.3772	-1.04026	0.295941	-3.51511	0.00043958	0.00503345	no
WBGene00009518	453.914	-1.04768	0.141311	-7.41397	1.22576e-13	1.19217e-11	no
WBGene00009526	204.623	-1.87128	0.163931	-11.4151	3.51659e-30	1.67901e-27	no
WBGene00009561	553.18	-0.59265	0.216005	-2.74369	0.00607536	0.0405092	yes
WBGene00009582	975.376	-0.839712	0.149936	-5.60047	2.13774e-08	8.46286e-07	no
WBGene00009593	106.721	-0.807807	0.298495	-2.70627	0.00680437	0.0443932	no
WBGene00009595	2227.54	0.812261	0.140925	5.76377	8.22561e-09	3.70293e-07	no
WBGene00009605	45.8463	1.00984	0.329161	3.06791	0.00215562	0.0180371	no
WBGene00009620	2326.48	0.76558	0.239469	3.19699	0.00138869	0.0129011	no
WBGene00009626	1422.97	1.16065	0.173595	6.68595	2.29426e-11	1.63567e-09	no
WBGene00009634	1076.66	-0.737518	0.13314	-5.53942	3.03475e-08	1.17483e-06	no
WBGene00009637	259.455	-0.731618	0.153215	-4.77511	1.7961e-06	4.36718e-05	no
WBGene00009640	1133.2	-0.743405	0.115402	-6.44189	1.17999e-10	7.06914e-09	no
WBGene00009641	47.7854	0.790069	0.274972	2.87328	0.00406239	0.0296741	no
WBGene00009686	1082.01	-0.835878	0.129092	-6.47504	9.47863e-11	5.85668e-09	no
WBGene00009706	347.441	0.943015	0.310276	3.03927	0.00237149	0.0194105	no
WBGene00009710	68.5409	0.968282	0.317456	3.05013	0.00228741	0.0188595	no
WBGene00009724	1992.84	0.98418	0.263365	3.73694	0.000186275	0.00247257	no
WBGene00009741	795.008	-0.677481	0.154449	-4.38644	1.15221e-05	0.000221934	no
WBGene00009754	30.1087	0.878153	0.306406	2.86598	0.00415723	0.0302279	no
WBGene00009759	34.2915	-1.2577	0.279675	-4.49699	6.89223e-06	0.000141953	no
WBGene00009778	31.3667	1.76313	0.295596	5.96466	2.45141e-09	1.20701e-07	no
WBGene00009787	15758	1.63266	0.229566	7.11195	1.14418e-12	9.58919e-11	no
WBGene00009789	351.937	1.40957	0.212236	6.64154	3.10421e-11	2.13581e-09	no
WBGene00009801	1505.32	0.77725	0.203956	3.81088	0.000138474	0.00193079	no
WBGene00009806	203.091	-0.981354	0.259869	-3.77633	0.000159153	0.00216575	no
WBGene00009809	288.053	0.644487	0.182131	3.53859	0.000402267	0.00467413	no
WBGene00009818	2441.51	-0.701776	0.131965	-5.31788	1.04983e-07	3.56491e-06	no
WBGene00009824	1183.73	0.749996	0.216857	3.45848	0.000543225	0.00593966	no
WBGene00009846	91.8953	1.18287	0.279695	4.22915	2.34577e-05	0.00041528	no
WBGene00009856	13.5451	-1.10451	0.348544	-3.16893	0.00153003	0.0138786	no
WBGene00009857	36.1108	-1.07848	0.320568	-3.36428	0.000767424	0.00794451	no
WBGene00009865	503.397	0.975298	0.172021	5.66965	1.43093e-08	6.12657e-07	no
WBGene00009877	660.327	-0.911106	0.239962	-3.79687	0.000146532	0.00202878	no
WBGene00009883	672.424	-0.671598	0.173805	-3.86408	0.000111506	0.00162225	no
WBGene00009897	114.267	-0.885147	0.313727	-2.82139	0.00478162	0.0336451	no
WBGene00009902	928.534	-1.43855	0.128624	-11.1842	4.87406e-29	2.02094e-26	no
WBGene00009903	101.373	-0.950608	0.256866	-3.7008	0.000214924	0.00277797	no
WBGene00009904	757.731	-1.25204	0.22359	-5.59972	2.14697e-08	8.4781e-07	no
WBGene00009946	159.842	0.858508	0.177655	4.83244	1.34873e-06	3.38924e-05	no
WBGene00009957	1487.5	0.947002	0.167465	5.65492	1.55918e-08	6.53363e-07	no
WBGene00009964	915.684	1.16785	0.207501	5.62819	1.82109e-08	7.41424e-07	no
WBGene00009969	125.904	1.12467	0.242444	4.63887	3.50324e-06	7.95345e-05	no
WBGene00010001	2173.16	1.55359	0.258638	6.00682	1.89194e-09	9.46332e-08	no
WBGene00010004	19.522	1.49188	0.334805	4.45596	8.35174e-06	0.000166359	no
WBGene00010005	124.759	3.66778	0.283371	12.9434	2.56125e-38	1.6142e-35	no
WBGene00010008	659.261	-0.604326	0.192506	-3.13927	0.00169372	0.0149923	yes
WBGene00010018	53.868	1.33804	0.274387	4.87648	1.07996e-06	2.81719e-05	no
WBGene00010034	716.471	-0.923357	0.153267	-6.02449	1.6964e-09	8.62207e-08	no
WBGene00010062	109.154	0.761739	0.240811	3.16322	0.00156034	0.0141048	no
WBGene00010072	45.3946	0.966464	0.29692	3.25497	0.00113405	0.0109019	no
WBGene00010080	919.803	-0.855342	0.10653	-8.02912	9.81704e-16	1.31083e-13	no
WBGene00010111	2146.16	-0.588618	0.162043	-3.63249	0.0002807	0.00349621	no
WBGene00010118	514.964	-1.10121	0.129656	-8.49338	2.00719e-17	3.40057e-15	no
WBGene00010119	31.2412	-0.899496	0.292008	-3.08038	0.00206736	0.0175408	no
WBGene00010123	455.019	-1.69967	0.168396	-10.0933	5.91477e-24	1.79217e-21	no
WBGene00010124	855.237	0.951191	0.227906	4.17361	2.99817e-05	0.000514027	no
WBGene00010125	209.982	0.974462	0.183678	5.30527	1.12504e-07	3.8039e-06	no
WBGene00010127	27.4007	1.60614	0.316879	5.06862	4.00712e-07	1.19125e-05	no
WBGene00010128	450.855	-0.827017	0.144985	-5.70416	1.16918e-08	5.08883e-07	no
WBGene00010135	9307.29	0.873044	0.272929	3.1988	0.00138002	0.0128357	no
WBGene00010157	194.556	-1.44232	0.296589	-4.86303	1.15603e-06	2.96652e-05	no
WBGene00010212	20.5766	-0.888335	0.3255	-2.72914	0.00634994	0.0419257	no
WBGene00010215	171.532	0.72443	0.174137	4.16012	3.18081e-05	0.000539471	no
WBGene00010238	1690.45	0.857078	0.218935	3.91476	9.04948e-05	0.00135794	no
WBGene00010246	42.3575	0.784248	0.295176	2.65688	0.00788664	0.0497645	no
WBGene00010251	559.278	0.742832	0.142138	5.22614	1.73081e-07	5.63442e-06	no
WBGene00010256	80.48	1.04424	0.241427	4.32529	1.5233e-05	0.000285049	no
WBGene00010267	1330.04	-1.08439	0.228131	-4.75339	2.00036e-06	4.78993e-05	no
WBGene00010285	939.042	-0.843539	0.230905	-3.65318	0.000259011	0.00327001	no
WBGene00010295	33.2861	-1.50825	0.28984	-5.20374	1.95315e-07	6.24216e-06	no
WBGene00010296	1655.33	-0.586909	0.134309	-4.36984	1.24336e-05	0.00023746	no
WBGene00010320	142.54	0.729376	0.192627	3.78646	0.000152808	0.00209908	no
WBGene00010321	444.905	-1.02227	0.217696	-4.69587	2.65475e-06	6.17846e-05	yes
WBGene00010355	173.555	-2.71299	0.237737	-11.4117	3.65391e-30	1.69326e-27	no
WBGene00010368	124.398	-2.0301	0.310216	-6.54416	5.98308e-11	3.91159e-09	no
WBGene00010446	39.1434	1.04176	0.28562	3.64736	0.000264948	0.00332897	no
WBGene00010449	602.206	-0.640142	0.119469	-5.35822	8.40474e-08	2.92976e-06	no
WBGene00010454	375.046	-0.782315	0.17388	-4.49917	6.82198e-06	0.000140874	no
WBGene00010466	49.0642	-0.976537	0.264535	-3.69152	0.000222919	0.00287423	no
WBGene00010467	398.262	-2.13817	0.229398	-9.32075	1.15525e-20	2.71672e-18	no
WBGene00010468	7993.61	-1.57008	0.213091	-7.36812	1.73051e-13	1.66255e-11	no
WBGene00010470	2785.55	1.16229	0.16594	7.00428	2.48255e-12	1.97551e-10	no
WBGene00010473	61.4729	0.850484	0.268748	3.16462	0.00155285	0.0140452	no
WBGene00010485	153.894	1.16861	0.301196	3.87988	0.000104506	0.00153601	no
WBGene00010491	1373.13	0.619662	0.174101	3.55921	0.00037197	0.00438352	no
WBGene00010499	41.5043	-2.39538	0.292566	-8.18748	2.66747e-16	3.96497e-14	no
WBGene00010505	538.342	-0.853515	0.244738	-3.48746	0.000487628	0.00544126	no
WBGene00010509	773.701	-4.21029	0.26222	-16.0563	5.16416e-58	7.39696e-55	no
WBGene00010510	87.0243	-0.763069	0.226218	-3.37316	0.000743119	0.00773865	no
WBGene00010516	394.34	-0.739233	0.152694	-4.84128	1.29006e-06	3.27313e-05	no
WBGene00010538	53.0287	1.08347	0.300857	3.60128	0.000316655	0.00384081	no
WBGene00010539	2738.42	0.814685	0.243061	3.35177	0.00080296	0.00825273	no
WBGene00010566	257.112	-0.921313	0.147476	-6.24719	4.17895e-10	2.2942e-08	no
WBGene00010597	2245.5	-0.716041	0.167723	-4.26919	1.96185e-05	0.000355297	no
WBGene00010630	489.002	1.14589	0.213442	5.3686	7.93524e-08	2.78458e-06	no
WBGene00010641	2281.92	-0.981846	0.10266	-9.56407	1.13212e-21	2.97295e-19	yes
WBGene00010646	453.625	-0.715305	0.17069	-4.19066	2.78146e-05	0.00048159	no
WBGene00010658	708.458	1.28296	0.179932	7.13024	1.00197e-12	8.53357e-11	no
WBGene00010661	14153.7	0.646409	0.235584	2.74386	0.00607218	0.0405052	no
WBGene00010698	314.032	-1.19618	0.197403	-6.0596	1.36464e-09	7.04959e-08	no
WBGene00010700	3311.71	0.634979	0.125545	5.05776	4.24202e-07	1.24696e-05	no
WBGene00010705	155.022	0.721367	0.19967	3.6128	0.000302911	0.00371704	no
WBGene00010706	87.9755	-0.934172	0.230467	-4.05338	5.04822e-05	0.00081163	no
WBGene00010724	1073.72	0.690848	0.148366	4.65638	3.21821e-06	7.38081e-05	no
WBGene00010740	101.417	-0.762094	0.201314	-3.7856	0.000153341	0.00210094	no
WBGene00010752	44.1015	0.882232	0.290448	3.03749	0.00238558	0.0194752	no
WBGene00010759	2107.66	-0.983459	0.167128	-5.88447	3.99336e-09	1.88947e-07	no
WBGene00010768	186.807	1.03065	0.158376	6.50763	7.63472e-11	4.88926e-09	no
WBGene00010774	361.748	-1.41253	0.142189	-9.93414	2.95718e-23	8.6284e-21	no
WBGene00010801	58.3608	-1.43798	0.298585	-4.81597	1.46483e-06	3.64036e-05	no
WBGene00010822	726.282	0.665251	0.127654	5.21136	1.87458e-07	6.02772e-06	no
WBGene00010831	634.733	-0.831497	0.225956	-3.6799	0.000233322	0.0029888	no
WBGene00010833	392.502	-0.849884	0.222383	-3.82171	0.000132532	0.00186944	no
WBGene00010835	1566.61	-0.915898	0.279836	-3.27298	0.00106421	0.0103186	yes
WBGene00010859	297.259	-0.912556	0.142229	-6.41611	1.39804e-10	8.25003e-09	no
WBGene00010904	11903.2	1.38926	0.129358	10.7397	6.62948e-27	2.487e-24	no
WBGene00010917	356.641	-0.702192	0.201463	-3.48546	0.00049129	0.00547825	no
WBGene00010924	3921.07	-0.629853	0.208154	-3.02591	0.00247888	0.0200396	no
WBGene00010931	246.804	1.39056	0.165739	8.39008	4.85809e-17	7.65441e-15	no
WBGene00010935	1502.77	0.698161	0.108844	6.41433	1.41447e-10	8.31584e-09	no
WBGene00010936	98.1878	0.886111	0.189843	4.6676	3.04741e-06	7.03002e-05	no
WBGene00010964	229376	-0.628769	0.138793	-4.53027	5.89088e-06	0.00012509	no
WBGene00010965	54290.3	-0.591441	0.153596	-3.85063	0.000117816	0.00169682	no
WBGene00010985	473.518	0.988174	0.175532	5.62958	1.80648e-08	7.37382e-07	no
WBGene00010998	349.968	0.764251	0.15944	4.79335	1.64017e-06	4.01906e-05	no
WBGene00011006	1498.45	-0.754887	0.153244	-4.92606	8.39046e-07	2.27931e-05	no
WBGene00011009	80.2097	2.3731	0.290218	8.17696	2.9109e-16	4.28636e-14	no
WBGene00011022	27.8353	-1.05399	0.337043	-3.12717	0.001765	0.0154927	no
WBGene00011023	94.1636	-1.55023	0.280647	-5.52378	3.31784e-08	1.2627e-06	no
WBGene00011042	355.958	2.08081	0.26859	7.74715	9.39808e-15	1.11335e-12	no
WBGene00011056	361.513	0.602669	0.158071	3.81264	0.00013749	0.00192218	no
WBGene00011063	236.747	-0.842472	0.303968	-2.77158	0.00557856	0.0380336	no
WBGene00011070	98.5041	0.596566	0.210008	2.84068	0.00450168	0.0321627	no
WBGene00011074	46.4004	0.864782	0.283487	3.05052	0.00228447	0.0188549	no
WBGene00011112	2105.65	-0.962133	0.206625	-4.65641	3.21763e-06	7.38081e-05	no
WBGene00011141	46.3236	0.95687	0.2547	3.75685	0.000172063	0.00231711	no
WBGene00011162	22.7564	-1.33427	0.315164	-4.23358	2.30001e-05	0.000408557	no
WBGene00011166	154.974	-0.607902	0.171757	-3.53931	0.000401179	0.00466542	no
WBGene00011167	50.536	-1.72148	0.321315	-5.35762	8.43253e-08	2.93057e-06	no
WBGene00011184	311.009	-1.52638	0.171191	-8.91626	4.82316e-19	9.99917e-17	no
WBGene00011190	110.352	1.55067	0.212413	7.30027	2.87195e-13	2.6006e-11	no
WBGene00011222	3715.05	-0.713411	0.139551	-5.11217	3.18474e-07	9.68727e-06	no
WBGene00011234	33.6552	0.792419	0.280037	2.8297	0.00465923	0.0330085	no
WBGene00011235	19681.8	-0.88756	0.0903733	-9.82104	9.13956e-23	2.52637e-20	yes
WBGene00011244	288.208	-0.926305	0.148917	-6.22027	4.9631e-10	2.70583e-08	no
WBGene00011272	1686.71	-0.764438	0.16851	-4.53644	5.72106e-06	0.000122308	no
WBGene00011286	197.13	0.989879	0.240344	4.11859	3.81195e-05	0.000632888	no
WBGene00011292	2410.85	0.892126	0.0929373	9.59922	8.05524e-22	2.15116e-19	no
WBGene00011328	513.629	1.02456	0.242757	4.22053	2.43728e-05	0.000428591	no
WBGene00011362	176.059	-1.75208	0.285696	-6.13267	8.64148e-10	4.56303e-08	no
WBGene00011364	434.567	-0.887398	0.202256	-4.38749	1.14665e-05	0.000221134	no
WBGene00011400	540.891	0.872164	0.168513	5.17565	2.2712e-07	7.14273e-06	no
WBGene00011407	519.779	-0.761991	0.115433	-6.60115	4.07993e-11	2.7781e-09	no
WBGene00011424	34.1138	1.46875	0.319945	4.59063	4.41921e-06	9.7253e-05	no
WBGene00011429	27.6415	0.873956	0.306397	2.85237	0.00433948	0.0313063	no
WBGene00011446	11022.2	2.22745	0.190177	11.7125	1.10002e-31	5.59093e-29	no
WBGene00011462	37.2006	-0.857352	0.319116	-2.68665	0.00721734	0.0464338	no
WBGene00011517	650.72	0.710702	0.109458	6.4929	8.4199e-11	5.28541e-09	yes
WBGene00011530	6989.62	-1.21761	0.264023	-4.61177	3.99255e-06	8.9483e-05	yes
WBGene00011533	96.9458	1.30429	0.308336	4.2301	2.33587e-05	0.000413993	no
WBGene00011548	2060.4	-0.723312	0.260451	-2.77715	0.00548384	0.0375859	no
WBGene00011556	489.277	0.80641	0.12574	6.41329	1.4241e-10	8.3413e-09	no
WBGene00011561	17672.5	1.45376	0.230545	6.30575	2.86806e-10	1.60815e-08	no
WBGene00011572	89.5386	-0.749491	0.27767	-2.69921	0.0069504	0.0451218	no
WBGene00011590	3802.15	-0.77662	0.202549	-3.83424	0.000125952	0.00179107	no
WBGene00011594	590.318	-0.924297	0.232069	-3.98285	6.80927e-05	0.00106225	no
WBGene00011624	382.944	-1.23335	0.271345	-4.54531	5.48536e-06	0.000118427	no
WBGene00011660	102.864	0.61107	0.187994	3.25047	0.00115213	0.0110479	no
WBGene00011665	181.688	-0.621092	0.197985	-3.13706	0.00170652	0.0150464	no
WBGene00011668	1923.09	-3.1086	0.165371	-18.7978	7.87325e-79	2.06751e-75	no
WBGene00011671	69.0523	-0.811628	0.268254	-3.02559	0.00248145	0.0200501	no
WBGene00011672	140.228	1.54216	0.189248	8.14889	3.67269e-16	5.21323e-14	no
WBGene00011673	204.587	-0.691078	0.250421	-2.75966	0.00578611	0.039127	no
WBGene00011674	45.6733	2.49699	0.319353	7.81892	5.32768e-15	6.45714e-13	no
WBGene00011692	211.008	0.708543	0.1729	4.09798	4.16766e-05	0.00068473	no
WBGene00011699	293.159	1.2599	0.285809	4.40819	1.04238e-05	0.000203768	no
WBGene00011737	3652.51	0.978719	0.130507	7.49933	6.41428e-14	6.6754e-12	no
WBGene00011796	1090.65	-0.850964	0.226608	-3.75523	0.000173185	0.00232825	no
WBGene00011798	284.659	0.673707	0.238275	2.82744	0.00469221	0.0331973	no
WBGene00011799	127.192	0.949175	0.212219	4.47261	7.72707e-06	0.000156287	no
WBGene00011817	180.394	0.813435	0.230449	3.52978	0.000415901	0.00481126	no
WBGene00011829	271.449	-0.764809	0.14221	-5.37801	7.53142e-08	2.66065e-06	no
WBGene00011833	3041.7	-0.791311	0.222483	-3.55673	0.000375503	0.00441196	no
WBGene00011844	116.521	-0.944831	0.219786	-4.29887	1.71674e-05	0.000316732	no
WBGene00011850	1276.02	1.01251	0.151651	6.67661	2.44529e-11	1.72771e-09	no
WBGene00011852	139.362	-0.71451	0.185108	-3.85996	0.000113406	0.0016408	no
WBGene00011882	34.7193	-1.34528	0.294313	-4.57094	4.8555e-06	0.000105667	no
WBGene00011891	5563.56	0.873615	0.294547	2.96597	0.00301734	0.0233528	no
WBGene00011894	192.998	2.03163	0.273273	7.43443	1.0502e-13	1.04728e-11	no
WBGene00011895	2967.87	-0.796059	0.220884	-3.60396	0.000313402	0.00381604	no
WBGene00011928	142.7	-0.640814	0.214531	-2.98705	0.0028168	0.0220584	no
WBGene00011997	296.409	-0.769718	0.151317	-5.08679	3.64179e-07	1.09504e-05	no
WBGene00011999	613.195	-0.851572	0.242426	-3.51271	0.000443562	0.00507167	no
WBGene00012005	3013.92	0.84009	0.136993	6.13235	8.65922e-10	4.56303e-08	no
WBGene00012013	184.163	0.918605	0.241006	3.81154	0.000138106	0.00192907	no
WBGene00012032	2667.29	-0.775518	0.249727	-3.10547	0.0018998	0.0163486	yes
WBGene00012068	61.1168	-0.738802	0.272886	-2.70737	0.00678193	0.0442652	no
WBGene00012085	3205	0.852929	0.147582	5.77936	7.49856e-09	3.39504e-07	no
WBGene00012101	225.389	1.15973	0.157995	7.34035	2.13043e-13	1.99804e-11	no
WBGene00012107	639.77	1.66593	0.231772	7.18781	6.58391e-13	5.73127e-11	no
WBGene00012113	429.435	1.2864	0.271541	4.73741	2.16468e-06	5.15206e-05	yes
WBGene00012114	73.019	0.705255	0.222591	3.16839	0.00153284	0.0138961	no
WBGene00012117	2256.84	0.60015	0.147298	4.07439	4.61357e-05	0.000749396	yes
WBGene00012118	10910.2	2.24091	0.117905	19.006	1.52027e-80	4.79068e-77	no
WBGene00012123	746.251	0.598067	0.206599	2.89483	0.00379368	0.0281021	no
WBGene00012130	1092.63	0.97528	0.14867	6.56002	5.3801e-11	3.54681e-09	no
WBGene00012140	3745.11	0.803318	0.194619	4.12764	3.66508e-05	0.000612376	no
WBGene00012141	509.849	0.652164	0.163965	3.97745	6.96568e-05	0.00108343	no
WBGene00012143	628.169	1.01157	0.292673	3.45633	0.000547594	0.00597913	no
WBGene00012152	1176.74	0.599865	0.197564	3.0363	0.00239498	0.0195318	no
WBGene00012168	1309.9	-0.884004	0.196934	-4.48883	7.16154e-06	0.000146542	no
WBGene00012185	763.004	1.565	0.253185	6.18123	6.36029e-10	3.42023e-08	no
WBGene00012217	90.7095	1.32934	0.244257	5.44236	5.25793e-08	1.93109e-06	no
WBGene00012256	4855.97	-0.711073	0.246684	-2.88253	0.00394497	0.0290046	no
WBGene00012257	3717.78	-1.26573	0.25916	-4.88396	1.03978e-06	2.72593e-05	yes
WBGene00012279	164.259	0.671658	0.178978	3.75274	0.00017491	0.00234543	no
WBGene00012295	160.497	0.826689	0.203036	4.07164	4.66841e-05	0.000757522	no
WBGene00012304	118	-1.41058	0.19961	-7.06665	1.58723e-12	1.30252e-10	no
WBGene00012308	79.346	-0.764741	0.229069	-3.33847	0.000842402	0.00856315	no
WBGene00012324	562.655	-0.819935	0.133346	-6.14892	7.80115e-10	4.13855e-08	no
WBGene00012346	246.676	-1.26545	0.24484	-5.16845	2.36039e-07	7.37902e-06	no
WBGene00012364	1493.13	1.12017	0.133288	8.40417	4.30911e-17	7.07232e-15	no
WBGene00012429	581.571	-1.05648	0.212223	-4.97813	6.42015e-07	1.79993e-05	no
WBGene00012435	286.936	0.662354	0.14166	4.67566	2.93012e-06	6.77754e-05	no
WBGene00012444	569.754	0.610394	0.17846	3.42034	0.00062544	0.00669458	no
WBGene00012526	14.29	-1.06762	0.350657	-3.04462	0.00232976	0.0191285	no
WBGene00012535	260.35	-0.906158	0.208613	-4.34373	1.40081e-05	0.000263379	no
WBGene00012547	36.8332	1.00055	0.305507	3.27504	0.00105647	0.0102499	no
WBGene00012548	482.864	0.673986	0.12157	5.54402	2.95612e-08	1.15289e-06	no
WBGene00012564	171.18	-0.588072	0.170306	-3.45303	0.000554333	0.00604853	no
WBGene00012573	38.6738	0.922307	0.264439	3.48778	0.000487041	0.00544126	no
WBGene00012582	215.035	-0.815696	0.177319	-4.60017	4.22141e-06	9.35478e-05	no
WBGene00012583	896.928	0.589228	0.19138	3.07884	0.00207805	0.0176091	no
WBGene00012615	25666.8	-0.795282	0.105365	-7.54785	4.42508e-14	4.74297e-12	no
WBGene00012632	76.8911	0.693391	0.240697	2.88076	0.00396713	0.0291268	no
WBGene00012635	652.246	-0.816649	0.227044	-3.59688	0.000322059	0.0038933	no
WBGene00012684	38.5064	1.04361	0.348315	2.99616	0.00273405	0.0215928	no
WBGene00012688	56.4039	-0.709304	0.263289	-2.69401	0.00705972	0.0456621	no
WBGene00012704	1241.41	0.72187	0.149232	4.83724	1.31656e-06	3.319e-05	no
WBGene00012747	167.305	-1.05561	0.218703	-4.82668	1.3883e-06	3.46656e-05	no
WBGene00012750	72.0091	1.24023	0.290412	4.27061	1.9494e-05	0.000353507	no
WBGene00012777	1156.45	-1.04486	0.221926	-4.70815	2.49972e-06	5.87846e-05	no
WBGene00012783	374.159	2.19138	0.247419	8.85697	8.22154e-19	1.66075e-16	no
WBGene00012785	19.8463	0.905039	0.332064	2.72549	0.00642054	0.0423095	no
WBGene00012796	1568.19	-0.593542	0.172781	-3.43522	0.00059207	0.00640704	no
WBGene00012813	2596.78	1.0013	0.19066	5.25176	1.5065e-07	4.98663e-06	no
WBGene00012819	118.447	0.707662	0.205031	3.45149	0.000557496	0.00607463	no
WBGene00012822	21.2838	1.22798	0.326999	3.7553	0.000173135	0.00232825	no
WBGene00012850	341.304	0.857475	0.267343	3.2074	0.00133942	0.0125469	no
WBGene00012869	587.629	0.751077	0.184232	4.0768	4.566e-05	0.000742435	no
WBGene00012886	197.118	1.6719	0.280256	5.96563	2.43698e-09	1.20367e-07	no
WBGene00012892	63.2875	-1.34338	0.285435	-4.70645	2.52073e-06	5.91021e-05	no
WBGene00012912	96.8693	-0.90752	0.299448	-3.03064	0.00244034	0.0198094	no
WBGene00012917	2086.13	-1.03497	0.247656	-4.17908	2.92692e-05	0.000504007	no
WBGene00012921	242.784	-1.37781	0.257181	-5.35737	8.44428e-08	2.93057e-06	no
WBGene00012940	17.4328	-1.03237	0.331778	-3.11163	0.00186057	0.0161464	no
WBGene00012947	44.6487	-1.02625	0.312368	-3.28538	0.00101844	0.00997297	no
WBGene00012961	271.264	0.608226	0.200709	3.03039	0.00244236	0.0198156	no
WBGene00013007	3132.1	-0.977551	0.186646	-5.23747	1.62791e-07	5.34363e-06	no
WBGene00013008	238.435	1.23742	0.273438	4.5254	6.02802e-06	0.00012783	no
WBGene00013030	737.942	0.905844	0.132365	6.84356	7.72514e-12	5.82379e-10	no
WBGene00013035	1785.54	-0.635575	0.0978682	-6.4942	8.34781e-11	5.26112e-09	no
WBGene00013074	718.29	1.23357	0.21544	5.72584	1.02925e-08	4.5553e-07	no
WBGene00013079	1094.68	0.707194	0.177113	3.99289	6.52725e-05	0.00102697	no
WBGene00013088	98.6637	-0.874969	0.269886	-3.242	0.00118695	0.0113274	no
WBGene00013107	39.5745	0.947252	0.317193	2.98636	0.00282322	0.0220977	no
WBGene00013127	565.353	0.964457	0.24655	3.91181	9.16085e-05	0.00137074	no
WBGene00013130	228.536	-1.981	0.201024	-9.85453	6.55211e-23	1.84988e-20	no
WBGene00013146	100.368	0.587761	0.209033	2.81181	0.00492636	0.0345072	no
WBGene00013171	708.884	-0.914403	0.274811	-3.32739	0.000876622	0.00883124	no
WBGene00013215	283.586	1.07406	0.198384	5.41405	6.16164e-08	2.22157e-06	no
WBGene00013220	101.838	0.666486	0.242358	2.75001	0.0059594	0.0399219	no
WBGene00013266	2077.64	0.591241	0.163472	3.61677	0.000298307	0.00368348	no
WBGene00013293	25.3533	-1.01948	0.302802	-3.36681	0.00076042	0.00789794	no
WBGene00013295	330.902	-0.637944	0.20203	-3.15767	0.00159035	0.0143186	no
WBGene00013329	89.9926	0.619478	0.213776	2.8978	0.00375795	0.0278899	no
WBGene00013330	83.2605	0.837133	0.215349	3.88734	0.000101351	0.00149381	no
WBGene00013331	3428.57	0.854782	0.228331	3.74361	0.000181398	0.00241802	no
WBGene00013352	6362.62	-0.658062	0.205794	-3.19768	0.0013854	0.0128781	no
WBGene00013385	1445.32	-0.677943	0.193655	-3.50078	0.000463893	0.00524325	no
WBGene00013387	311.672	-0.753623	0.225188	-3.34664	0.000817988	0.00837441	no
WBGene00013391	33.947	-1.09038	0.358675	-3.04001	0.00236571	0.0193872	no
WBGene00013438	648.482	0.907441	0.177497	5.11242	3.18063e-07	9.68727e-06	no
WBGene00013450	70.0481	-1.21783	0.317269	-3.83848	0.0001238	0.00176962	no
WBGene00013481	14959.8	2.01265	0.182315	11.0394	2.46696e-28	9.96651e-26	no
WBGene00013485	242.126	1.00736	0.162539	6.19762	5.73233e-10	3.10373e-08	no
WBGene00013489	22381.7	1.95827	0.278598	7.02902	2.07985e-12	1.68918e-10	no
WBGene00013495	28.3468	1.02843	0.340384	3.02137	0.00251632	0.0202281	no
WBGene00013499	1461	0.917519	0.150264	6.10603	1.02137e-09	5.36425e-08	no
WBGene00013514	756.659	-0.695282	0.136227	-5.10385	3.32807e-07	1.00647e-05	no
WBGene00013515	964.29	0.90382	0.284842	3.17306	0.00150841	0.0137316	no
WBGene00013539	171.494	-0.601614	0.164812	-3.65031	0.000261927	0.0032989	no
WBGene00013540	883.801	0.789687	0.201297	3.923	8.74537e-05	0.00131481	no
WBGene00013578	1419.39	0.748367	0.175639	4.26083	2.0367e-05	0.000367585	yes
WBGene00013621	87.3288	-1.43289	0.298896	-4.79396	1.63523e-06	4.0132e-05	no
WBGene00013622	120.675	-1.43654	0.27664	-5.19281	2.07148e-07	6.56705e-06	no
WBGene00013633	473.038	1.64961	0.262105	6.29368	3.10033e-10	1.72611e-08	no
WBGene00013673	507.03	-0.794901	0.237275	-3.35013	0.000807736	0.008291	yes
WBGene00013690	3764.57	-0.74719	0.152754	-4.89144	1.001e-06	2.65071e-05	no
WBGene00013704	407.805	0.879745	0.223224	3.94109	8.11125e-05	0.00123241	no
WBGene00013733	349.422	0.74414	0.148574	5.00855	5.48426e-07	1.56332e-05	no
WBGene00013762	1742.78	-0.797921	0.185284	-4.30648	1.65874e-05	0.000307834	no
WBGene00013763	606.768	0.88587	0.138697	6.38711	1.69048e-10	9.6855e-09	no
WBGene00013771	195.176	1.03982	0.315965	3.29093	0.000998554	0.00981486	no
WBGene00013825	17.2888	0.924612	0.347359	2.66184	0.00777155	0.0490972	no
WBGene00013826	24.7545	-0.899274	0.337387	-2.66541	0.0076895	0.0487352	no
WBGene00013839	104.502	-0.61869	0.202998	-3.04777	0.00230544	0.0189783	no
WBGene00013845	182.44	0.600986	0.220292	2.72814	0.00636927	0.0420068	no
WBGene00013853	1231	0.880483	0.292425	3.01097	0.00260414	0.0208278	no
WBGene00013856	76.3899	1.56301	0.24215	6.45471	1.08425e-10	6.57053e-09	no
WBGene00013898	400.549	0.605327	0.222162	2.72471	0.00643582	0.0423747	no
WBGene00013899	490.909	0.592546	0.117629	5.03743	4.71832e-07	1.37416e-05	no
WBGene00013904	908.842	-1.42767	0.223943	-6.37512	1.82824e-10	1.04368e-08	no
WBGene00013949	95.1097	0.936708	0.259323	3.61213	0.000303696	0.00372368	no
WBGene00013950	134.414	0.830453	0.238028	3.48889	0.000485022	0.00542371	no
WBGene00013969	8802.48	0.645611	0.148176	4.35706	1.31818e-05	0.000249331	yes
WBGene00013975	87.7908	0.881642	0.247329	3.56466	0.000364334	0.00431613	no
WBGene00013980	415.692	1.02996	0.270962	3.80114	0.000144034	0.00199947	no
WBGene00014003	2879.7	-0.66905	0.178038	-3.7579	0.000171342	0.00231334	no
WBGene00014009	1697.1	-2.07608	0.275897	-7.52485	5.2782e-14	5.54422e-12	no
WBGene00014046	60.8485	-1.36033	0.272904	-4.98464	6.20766e-07	1.74657e-05	no
WBGene00014090	1111.45	0.74852	0.215535	3.47285	0.000514955	0.00568979	no
WBGene00014094	326.845	-0.897357	0.258071	-3.47717	0.000506733	0.00562656	no
WBGene00014100	62.9421	0.940089	0.32768	2.86892	0.00411873	0.0299883	no
WBGene00014132	99.408	1.32537	0.287632	4.60786	4.06841e-06	9.05395e-05	no
WBGene00014134	58.2743	-1.0674	0.241735	-4.41558	1.00738e-05	0.000197662	no
WBGene00014136	235.83	-0.847774	0.203725	-4.16137	3.16346e-05	0.000538266	no
WBGene00014137	541.868	-0.631486	0.160779	-3.92766	8.57777e-05	0.00129208	no
WBGene00014173	5539.17	4.33342	0.184943	23.4311	2.06107e-121	1.08247e-117	no
WBGene00014184	326.04	-0.790379	0.258441	-3.05825	0.00222632	0.018462	no
WBGene00014206	251.114	-1.14374	0.166096	-6.88604	5.73679e-12	4.40921e-10	no
WBGene00014213	2536.81	0.622604	0.175177	3.55415	0.000379198	0.00443881	no
WBGene00014216	91.6787	0.622763	0.217071	2.86893	0.00411862	0.0299883	no
WBGene00014244	6181.84	-0.819853	0.145165	-5.64773	1.62582e-08	6.74398e-07	no
WBGene00014254	129.083	0.710034	0.227564	3.12015	0.00180759	0.0157612	no
WBGene00014300	1382.95	-0.740725	0.157322	-4.70833	2.49754e-06	5.87846e-05	no
WBGene00014467	262.917	-0.645485	0.233435	-2.76516	0.00568949	0.0386395	no
WBGene00014471	204.904	-0.738328	0.196829	-3.75111	0.000176056	0.00235679	no
WBGene00014562	567.08	-0.913834	0.140533	-6.50263	7.89291e-11	4.9944e-09	no
WBGene00014793	1439.35	0.994848	0.111966	8.88526	6.37726e-19	1.30494e-16	no
WBGene00014813	60.0885	1.24673	0.258029	4.83175	1.35337e-06	3.3955e-05	no
WBGene00014836	816.578	0.613906	0.122951	4.9931	5.94177e-07	1.68076e-05	no
WBGene00014864	76.0518	-0.632294	0.224053	-2.82208	0.00477139	0.0336043	no
WBGene00015024	105.148	0.770113	0.286708	2.68605	0.00723021	0.0464423	no
WBGene00015044	158.267	-0.870013	0.206377	-4.21564	2.49069e-05	0.000437008	no
WBGene00015046	2218.58	2.70889	0.284144	9.53351	1.5206e-21	3.86428e-19	no
WBGene00015056	1105	0.918804	0.280365	3.27717	0.00104852	0.0102041	no
WBGene00015057	1679.52	0.612758	0.137832	4.4457	8.76077e-06	0.000173847	no
WBGene00015059	335.825	1.24826	0.256233	4.87161	1.10693e-06	2.87329e-05	no
WBGene00015076	305.666	1.19501	0.210027	5.6898	1.27189e-08	5.47536e-07	no
WBGene00015116	2660.04	-0.945448	0.174891	-5.40593	6.44735e-08	2.314e-06	no
WBGene00015128	1433.31	1.41066	0.11259	12.5292	5.17053e-36	3.13334e-33	no
WBGene00015131	1490.08	0.737782	0.151641	4.86531	1.14278e-06	2.95175e-05	no
WBGene00015138	420.897	0.908904	0.201579	4.50892	6.51598e-06	0.000136332	no
WBGene00015141	3570.58	-0.86174	0.103463	-8.32897	8.15517e-17	1.25973e-14	no
WBGene00015169	4015.43	0.673373	0.184828	3.64325	0.000269217	0.00336791	no
WBGene00015196	502.948	0.886315	0.259941	3.40968	0.000650384	0.00692395	no
WBGene00015225	37.7374	-1.3654	0.275022	-4.96467	6.88166e-07	1.91316e-05	no
WBGene00015227	64.6133	-1.37575	0.265052	-5.1905	2.09728e-07	6.6355e-06	no
WBGene00015236	188.842	-0.987307	0.16921	-5.8348	5.38546e-09	2.50305e-07	no
WBGene00015251	354.136	0.655922	0.13539	4.84469	1.2681e-06	3.22781e-05	no
WBGene00015262	22.4098	0.976034	0.324045	3.01203	0.00259504	0.0207762	no
WBGene00015300	657.255	-2.34704	0.26804	-8.7563	2.01762e-18	3.89475e-16	no
WBGene00015306	41.7258	1.2664	0.337436	3.75301	0.000174722	0.00234491	no
WBGene00015332	2393.21	0.812024	0.260119	3.12175	0.00179782	0.0157108	no
WBGene00015335	955.567	-0.904778	0.243224	-3.71995	0.000199266	0.0026055	no
WBGene00015340	8008.32	-1.16109	0.250366	-4.63756	3.52545e-06	7.9809e-05	yes
WBGene00015362	261.936	0.621535	0.173171	3.58913	0.00033178	0.0039844	no
WBGene00015376	98.1078	-0.921509	0.236397	-3.89814	9.69354e-05	0.0014368	no
WBGene00015388	245.556	-0.704568	0.216769	-3.25032	0.00115275	0.0110479	no
WBGene00015395	90.7268	0.801039	0.252137	3.177	0.00148805	0.0135996	no
WBGene00015400	3541.82	-0.682984	0.152522	-4.47793	7.53698e-06	0.000152835	no
WBGene00015426	197.21	-0.80811	0.258936	-3.12088	0.0018031	0.0157381	no
WBGene00015442	329.059	-1.08657	0.243603	-4.4604	8.18065e-06	0.000163572	no
WBGene00015449	343.824	-1.32402	0.17226	-7.68616	1.51621e-14	1.75657e-12	no
WBGene00015453	464.245	-3.66594	0.217138	-16.883	6.00389e-64	1.18247e-60	no
WBGene00015476	268.934	0.704417	0.235304	2.99365	0.0027566	0.0217166	no
WBGene00015484	1671.1	0.847625	0.167798	5.05146	4.38453e-07	1.28406e-05	no
WBGene00015505	144.955	0.606573	0.181895	3.33475	0.000853774	0.00865493	no
WBGene00015514	40005.8	0.876146	0.148304	5.90778	3.46747e-09	1.66566e-07	no
WBGene00015537	30.9525	0.864875	0.311044	2.78055	0.00542665	0.0372903	no
WBGene00015541	2230.8	-1.04714	0.232606	-4.50175	6.73971e-06	0.000139725	no
WBGene00015545	4864.31	-0.667239	0.218188	-3.05809	0.00222752	0.0184623	no
WBGene00015559	65.8666	1.41327	0.258381	5.46973	4.50712e-08	1.67186e-06	no
WBGene00015560	80.3289	1.04787	0.226367	4.6291	3.67262e-06	8.27837e-05	no
WBGene00015630	36.8739	0.974881	0.34046	2.86342	0.00419096	0.0304158	no
WBGene00015695	1519.17	-0.65731	0.215538	-3.04963	0.00229126	0.0188814	no
WBGene00015710	310.838	-0.894338	0.174075	-5.13765	2.78193e-07	8.57771e-06	no
WBGene00015740	354.66	0.795439	0.179493	4.43159	9.35426e-06	0.000184232	no
WBGene00015759	3089.13	1.35753	0.206025	6.58917	4.42305e-11	2.99097e-09	no
WBGene00015776	343.019	0.727306	0.165179	4.40313	1.06699e-05	0.000207549	no
WBGene00015781	3071.09	-0.890741	0.250616	-3.55421	0.000379121	0.00443881	no
WBGene00015805	419.885	0.776663	0.255876	3.0353	0.00240293	0.0195864	no
WBGene00015860	43.1251	-0.800758	0.292556	-2.73711	0.00619817	0.0411193	no
WBGene00015865	389.804	1.2487	0.221372	5.64073	1.69327e-08	6.98408e-07	no
WBGene00015877	58.8187	1.47127	0.266142	5.52815	3.23628e-08	1.24065e-06	no
WBGene00015879	113.374	1.39055	0.284068	4.89515	9.82316e-07	2.60562e-05	no
WBGene00015884	109.884	1.70353	0.235254	7.24126	4.44551e-13	3.91304e-11	no
WBGene00015886	160.396	0.69949	0.184618	3.78886	0.000151343	0.00208077	no
WBGene00015896	84.3056	1.24975	0.313629	3.9848	6.75365e-05	0.00105461	no
WBGene00015913	54401.3	-0.706474	0.110591	-6.38815	1.67908e-10	9.65533e-09	no
WBGene00015933	3155.75	-1.69054	0.208825	-8.09551	5.70228e-16	7.95089e-14	no
WBGene00015947	262.514	0.966114	0.177796	5.43385	5.51508e-08	2.01614e-06	no
WBGene00015966	4291.68	-0.642097	0.106215	-6.04524	1.49189e-09	7.65673e-08	no
WBGene00015968	184.739	-0.958359	0.191361	-5.00811	5.49683e-07	1.56332e-05	no
WBGene00016027	3475.12	-0.591212	0.184385	-3.2064	0.00134406	0.0125754	no
WBGene00016052	61.7065	1.68983	0.344753	4.90158	9.50697e-07	2.53027e-05	no
WBGene00016066	210.282	1.43597	0.240928	5.96016	2.51984e-09	1.23684e-07	no
WBGene00016095	694.443	0.798952	0.178373	4.47912	7.49511e-06	0.000152182	no
WBGene00016097	366.658	1.09412	0.147542	7.41561	1.21063e-13	1.18476e-11	no
WBGene00016119	270.589	1.28919	0.295651	4.36051	1.29763e-05	0.000245738	no
WBGene00016133	3494.51	-1.05015	0.223084	-4.70742	2.50871e-06	5.89079e-05	yes
WBGene00016136	95.11	-0.780277	0.2698	-2.89206	0.0038273	0.0282847	no
WBGene00016147	618.761	1.60682	0.281532	5.70743	1.14694e-08	5.00587e-07	no
WBGene00016164	61.9538	-1.90182	0.276562	-6.87664	6.1279e-12	4.68695e-10	no
WBGene00016177	47.092	-0.776953	0.247528	-3.13885	0.00169614	0.0150053	no
WBGene00016181	97.9311	0.678128	0.225499	3.00723	0.00263638	0.0209987	no
WBGene00016196	765.678	-1.8583	0.264781	-7.01828	2.2462e-12	1.8056e-10	no
WBGene00016201	5876.47	-0.992095	0.104687	-9.47676	2.62293e-21	6.44536e-19	no
WBGene00016212	33.676	0.895624	0.298882	2.99658	0.00273028	0.0215739	no
WBGene00016217	358.184	-0.740881	0.236318	-3.1351	0.00171794	0.0151217	no
WBGene00016218	449.818	0.738485	0.122925	6.00761	1.88282e-09	9.46332e-08	no
WBGene00016247	935.421	3.18581	0.191605	16.627	4.44467e-62	7.78114e-59	no
WBGene00016274	3863.73	-1.30671	0.119651	-10.921	9.14932e-28	3.60392e-25	no
WBGene00016276	191.764	-1.00196	0.22053	-4.54342	5.53479e-06	0.000119134	no
WBGene00016283	1024.06	1.46683	0.241656	6.0699	1.27988e-09	6.63348e-08	no
WBGene00016285	15.9134	-1.13262	0.340199	-3.3293	0.000870655	0.00878235	no
WBGene00016286	35.5176	1.01796	0.329188	3.09233	0.00198594	0.0169688	no
WBGene00016294	459.654	0.97252	0.240916	4.03676	5.41944e-05	0.000866011	no
WBGene00016295	60.2328	1.22397	0.254841	4.80289	1.56395e-06	3.87447e-05	no
WBGene00016319	518.743	-0.769371	0.219102	-3.51147	0.000445629	0.00508424	no
WBGene00016355	818.19	0.627015	0.149407	4.19668	2.70851e-05	0.000470511	yes
WBGene00016356	36.9236	1.34953	0.299905	4.49984	6.80052e-06	0.000140615	no
WBGene00016360	386.166	2.07921	0.232949	8.92558	4.43377e-19	9.31446e-17	no
WBGene00016361	33.5881	1.70128	0.3261	5.21707	1.81778e-07	5.8811e-06	no
WBGene00016403	551.534	0.59141	0.210125	2.81457	0.00488431	0.0342488	no
WBGene00016417	782.75	1.66984	0.278044	6.00565	1.90561e-09	9.50153e-08	no
WBGene00016419	10102.3	1.19834	0.228725	5.2392	1.61274e-07	5.30485e-06	no
WBGene00016424	415.159	0.859873	0.129048	6.66319	2.67945e-11	1.86803e-09	no
WBGene00016425	2031.22	1.12107	0.102792	10.9062	1.07635e-27	4.13632e-25	no
WBGene00016462	73.7113	0.799569	0.29197	2.73853	0.00617137	0.0410106	no
WBGene00016483	381.062	0.718308	0.254875	2.81828	0.00482823	0.033916	no
WBGene00016505	1590.27	1.30051	0.239192	5.43711	5.41518e-08	1.98422e-06	no
WBGene00016507	458.148	0.614565	0.119822	5.12898	2.91318e-07	8.96487e-06	no
WBGene00016558	355.596	-0.923498	0.159812	-5.77864	7.53057e-09	3.39976e-07	no
WBGene00016577	235.1	-1.31495	0.185914	-7.07288	1.51747e-12	1.2518e-10	no
WBGene00016594	6481.15	0.929106	0.21494	4.32264	1.54176e-05	0.000288162	no
WBGene00016596	16783.5	1.935	0.264958	7.30303	2.81354e-13	2.56244e-11	no
WBGene00016598	91.3975	-1.2782	0.227126	-5.62772	1.82605e-08	7.41526e-07	no
WBGene00016614	938.785	-0.637559	0.141636	-4.50139	6.75116e-06	0.000139778	no
WBGene00016628	481.427	1.5011	0.276656	5.42585	5.76783e-08	2.0988e-06	no
WBGene00016644	2123.03	-0.640159	0.204987	-3.12292	0.00179068	0.0156831	no
WBGene00016645	93.1386	0.975092	0.206798	4.71518	2.41494e-06	5.71319e-05	no
WBGene00016657	517.209	1.05045	0.196482	5.3463	8.9771e-08	3.08155e-06	no
WBGene00016659	12213.8	2.45061	0.165591	14.7991	1.48357e-49	1.29862e-46	no
WBGene00016660	32.9507	1.48601	0.315844	4.70489	2.53998e-06	5.93767e-05	no
WBGene00016662	340.913	2.16262	0.318717	6.78541	1.15761e-11	8.64424e-10	no
WBGene00016663	275.307	1.15282	0.138112	8.34696	7.00419e-17	1.09265e-14	yes
WBGene00016669	48.8124	1.20413	0.334492	3.59986	0.000318384	0.00385881	no
WBGene00016670	54.8057	2.01854	0.317928	6.34905	2.16654e-10	1.22351e-08	no
WBGene00016677	1349.6	0.81703	0.147873	5.52523	3.29056e-08	1.25687e-06	no
WBGene00016728	862.747	-0.945673	0.248132	-3.81116	0.000138315	0.00193029	no
WBGene00016756	979.66	-0.676585	0.137485	-4.92117	8.60293e-07	2.33301e-05	no
WBGene00016780	46.6991	1.87746	0.303137	6.19343	5.88671e-10	3.17641e-08	no
WBGene00016783	38.0396	1.19867	0.271622	4.413	1.0195e-05	0.000199792	no
WBGene00016784	107.978	1.26781	0.252183	5.02733	4.97345e-07	1.43783e-05	no
WBGene00016786	184.421	-0.629479	0.200367	-3.14162	0.00168014	0.0149224	no
WBGene00016788	321.866	1.19628	0.23938	4.9974	5.81076e-07	1.64666e-05	no
WBGene00016800	129.529	1.29065	0.323247	3.99276	6.53099e-05	0.00102697	no
WBGene00016839	25.0147	0.997194	0.337817	2.95188	0.0031585	0.0241579	no
WBGene00016845	390.691	1.576	0.235864	6.6818	2.36021e-11	1.67511e-09	no
WBGene00016862	1430.06	0.647273	0.211068	3.06666	0.00216468	0.0180841	no
WBGene00016872	190.015	-0.95038	0.222059	-4.27985	1.87017e-05	0.000342633	no
WBGene00016874	984.373	-0.672941	0.101361	-6.63903	3.15754e-11	2.16305e-09	no
WBGene00016875	1324.65	-0.629605	0.232895	-2.70339	0.00686366	0.0446691	no
WBGene00016877	834.345	-0.663201	0.228224	-2.90593	0.00366165	0.0273297	no
WBGene00016894	1428.31	1.34137	0.291415	4.60297	4.16514e-06	9.24309e-05	no
WBGene00016900	158.289	-0.673915	0.18608	-3.62164	0.000292741	0.00362898	no
WBGene00016912	254.141	-1.78648	0.185015	-9.65586	4.64228e-22	1.2611e-19	no
WBGene00016919	181.734	0.756325	0.20497	3.68992	0.000224321	0.00288994	no
WBGene00016933	47.6293	-0.783979	0.252407	-3.10601	0.0018963	0.0163358	no
WBGene00016942	949.214	-0.66953	0.135897	-4.92673	8.36172e-07	2.27565e-05	no
WBGene00016943	91014.4	-0.701336	0.0925546	-7.57753	3.52184e-14	3.85348e-12	no
WBGene00016953	150.794	1.13474	0.245025	4.63111	3.63716e-06	8.22196e-05	no
WBGene00016957	2847.46	-1.00634	0.181859	-5.53363	3.13664e-08	1.20834e-06	no
WBGene00016970	319.665	-0.69123	0.177655	-3.89085	9.98949e-05	0.00147649	no
WBGene00016996	661.694	0.873772	0.235853	3.70472	0.000211622	0.00273979	no
WBGene00016997	1205.31	1.06856	0.158028	6.76183	1.36256e-11	9.9391e-10	yes
WBGene00016998	149.197	-0.762213	0.250761	-3.0396	0.00236894	0.0193997	no
WBGene00017018	2234.59	-0.93836	0.23529	-3.9881	6.66052e-05	0.0010411	no
WBGene00017035	21.3722	1.68253	0.341311	4.92962	8.23906e-07	2.25373e-05	no
WBGene00017060	317.607	0.911794	0.176811	5.15688	2.51102e-07	7.77282e-06	no
WBGene00017073	2247.34	-0.588936	0.191068	-3.08233	0.00205388	0.0174546	no
WBGene00017082	1260.2	0.854163	0.206253	4.14133	3.45299e-05	0.000582497	no
WBGene00017089	227.247	-0.817794	0.147219	-5.55493	2.77718e-08	1.08579e-06	no
WBGene00017126	2081.21	0.942211	0.232047	4.06044	4.89803e-05	0.000789093	no
WBGene00017127	1260.74	1.43341	0.156733	9.1455	5.93524e-20	1.3553e-17	no
WBGene00017131	239.57	-1.09253	0.159537	-6.84812	7.4827e-12	5.66814e-10	no
WBGene00017140	45.1023	1.82936	0.304535	6.00706	1.88918e-09	9.46332e-08	no
WBGene00017154	459.247	0.823848	0.275803	2.98708	0.00281652	0.0220584	no
WBGene00017212	72.3036	-2.05976	0.328951	-6.26161	3.81031e-10	2.09914e-08	no
WBGene00017215	35.6001	0.915113	0.336264	2.72142	0.0065003	0.0426922	no
WBGene00017246	341.206	0.726263	0.12915	5.6234	1.8723e-08	7.5641e-07	no
WBGene00017247	293.704	0.698909	0.201679	3.46546	0.000529329	0.00581192	no
WBGene00017262	3133.51	-0.597059	0.165997	-3.5968	0.000322155	0.0038933	no
WBGene00017291	410.245	1.12388	0.160989	6.98108	2.92922e-12	2.29616e-10	no
WBGene00017301	12959.4	-0.619305	0.146034	-4.24083	2.22697e-05	0.000397825	no
WBGene00017303	152.802	0.936767	0.207107	4.5231	6.09392e-06	0.000128708	no
WBGene00017305	1167.35	0.672583	0.209751	3.20657	0.00134326	0.0125754	no
WBGene00017312	314.603	2.08365	0.268074	7.77267	7.68478e-15	9.17283e-13	no
WBGene00017320	214.775	-0.940632	0.183965	-5.1131	3.16919e-07	9.68727e-06	no
WBGene00017322	1129.13	-0.703118	0.112285	-6.26193	3.80241e-10	2.09914e-08	no
WBGene00017331	74.5177	1.16825	0.27729	4.21311	2.51883e-05	0.000440963	no
WBGene00017336	730.131	0.926593	0.156246	5.93035	3.02285e-09	1.46548e-07	no
WBGene00017351	342.816	-0.794236	0.189121	-4.19961	2.67378e-05	0.000464989	no
WBGene00017361	38.1145	1.09378	0.279962	3.9069	9.34888e-05	0.00139342	no
WBGene00017364	228.673	0.822003	0.233548	3.51963	0.000432153	0.00495921	no
WBGene00017376	627.321	-0.627809	0.120994	-5.18874	2.11717e-07	6.68499e-06	no
WBGene00017382	24.1041	-1.56436	0.338466	-4.62191	3.80214e-06	8.54587e-05	no
WBGene00017390	116.676	2.55721	0.242489	10.5457	5.31963e-26	1.82209e-23	no
WBGene00017397	332.756	1.24531	0.138469	8.99345	2.39593e-19	5.24308e-17	no
WBGene00017424	139.41	-0.822721	0.261054	-3.15153	0.00162418	0.0145732	no
WBGene00017434	156.66	0.707124	0.19739	3.58237	0.000340495	0.00407043	no
WBGene00017438	7988.72	-1.61657	0.251168	-6.43622	1.22481e-10	7.28233e-09	no
WBGene00017464	269.549	0.664497	0.217624	3.05342	0.00226246	0.0187224	no
WBGene00017466	33.1988	0.918801	0.279062	3.29246	0.000993153	0.00977396	no
WBGene00017467	315.009	0.835072	0.179109	4.66235	3.12613e-06	7.20106e-05	no
WBGene00017471	648.579	1.01036	0.213988	4.72156	2.34042e-06	5.54521e-05	no
WBGene00017484	94.2294	1.08822	0.301285	3.61193	0.000303926	0.00372368	no
WBGene00017485	307.47	-1.11639	0.220688	-5.05869	4.22142e-07	1.24323e-05	no
WBGene00017501	75.9617	-2.52914	0.335368	-7.54141	4.64934e-14	4.91644e-12	no
WBGene00017506	13576.3	1.93804	0.212772	9.10851	8.35238e-20	1.88e-17	no
WBGene00017513	271.901	0.978115	0.145696	6.71339	1.90153e-11	1.37433e-09	no
WBGene00017524	32.6213	-0.88604	0.328657	-2.69594	0.00701893	0.0454729	no
WBGene00017560	816.855	-1.07202	0.269613	-3.97614	7.00426e-05	0.00108836	no
WBGene00017567	718.811	-0.814059	0.241527	-3.37047	0.000750397	0.00779898	no
WBGene00017569	2651.15	0.918914	0.250634	3.66636	0.000246025	0.00311605	no
WBGene00017570	143.333	-0.651455	0.189487	-3.438	0.000586037	0.00635643	no
WBGene00017577	638.233	-0.813951	0.283197	-2.87415	0.00405117	0.0296196	no
WBGene00017594	53.1894	-0.904487	0.26017	-3.47652	0.000507969	0.00563234	no
WBGene00017599	299.913	-0.680931	0.143501	-4.74514	2.08365e-06	4.96671e-05	no
WBGene00017660	78.8216	1.48678	0.299352	4.96667	6.81131e-07	1.89945e-05	no
WBGene00017673	29.1711	1.17417	0.308575	3.80513	0.00014173	0.00197269	no
WBGene00017688	896.358	-0.617601	0.1543	-4.0026	6.2649e-05	0.000990068	no
WBGene00017691	22156.4	-0.873692	0.110146	-7.93211	2.15446e-15	2.67289e-13	no
WBGene00017692	291.618	-0.704808	0.229239	-3.07455	0.00210817	0.0177723	no
WBGene00017698	384.098	2.37265	0.208474	11.381	5.19858e-30	2.34025e-27	no
WBGene00017703	370.789	-0.948997	0.151557	-6.26167	3.80881e-10	2.09914e-08	no
WBGene00017707	36.8654	-1.41414	0.297148	-4.75903	1.94527e-06	4.67221e-05	no
WBGene00017717	2091.74	-0.848804	0.172563	-4.91881	8.70703e-07	2.35718e-05	no
WBGene00017724	543.463	0.848412	0.242889	3.49301	0.000477617	0.00535992	no
WBGene00017726	226.885	1.23652	0.202676	6.10097	1.05428e-09	5.51867e-08	no
WBGene00017736	176.693	1.24827	0.181134	6.89146	5.5224e-12	4.26524e-10	no
WBGene00017743	426.176	-2.66242	0.205574	-12.9511	2.31468e-38	1.51959e-35	no
WBGene00017748	214.609	0.794988	0.237951	3.34097	0.000834862	0.00849747	no
WBGene00017751	146.015	-0.713278	0.209666	-3.40197	0.000669031	0.00706992	no
WBGene00017771	418.887	-0.598797	0.164262	-3.64539	0.000266987	0.00334657	no
WBGene00017783	216.728	-0.838946	0.238877	-3.51204	0.000444675	0.00507702	no
WBGene00017785	212.144	0.594273	0.164463	3.61342	0.000302187	0.00371329	no
WBGene00017789	847.434	1.46399	0.144394	10.1388	3.71652e-24	1.14819e-21	no
WBGene00017823	38.0639	1.52699	0.286252	5.33444	9.58414e-08	3.26857e-06	no
WBGene00017838	320.737	1.43129	0.234766	6.09667	1.083e-09	5.65027e-08	no
WBGene00017842	734.563	-0.717259	0.228623	-3.1373	0.0017051	0.0150423	no
WBGene00017881	13003.7	-1.00303	0.140898	-7.11879	1.08881e-12	9.17395e-11	no
WBGene00017901	1074.13	0.852383	0.196076	4.34722	1.37877e-05	0.000259545	no
WBGene00017909	340.646	-0.606772	0.138933	-4.36738	1.25746e-05	0.000239571	no
WBGene00017961	178.881	0.62749	0.184228	3.40606	0.000659081	0.00699263	no
WBGene00017964	2761.87	1.1379	0.16215	7.01757	2.25758e-12	1.8056e-10	yes
WBGene00017991	4297.97	-0.727658	0.248962	-2.92277	0.00346934	0.0260744	no
WBGene00017998	10879.7	-0.912439	0.274904	-3.31912	0.000903015	0.00904508	no
WBGene00018005	175.977	0.806368	0.238418	3.38216	0.000719175	0.00753343	no
WBGene00018027	112.281	-0.871443	0.260473	-3.34562	0.000821003	0.00839437	no
WBGene00018031	8189.79	0.81299	0.242956	3.34625	0.000819135	0.00838071	no
WBGene00018052	364.402	1.62164	0.214971	7.54355	4.57355e-14	4.86898e-12	yes
WBGene00018057	56.4012	1.19348	0.24668	4.83818	1.31032e-06	3.30855e-05	no
WBGene00018112	306.872	0.902267	0.253079	3.56516	0.000363628	0.00431425	no
WBGene00018127	19.621	1.12164	0.349491	3.20935	0.00133035	0.0124917	no
WBGene00018135	176.414	1.39044	0.308796	4.50278	6.70687e-06	0.000139227	no
WBGene00018146	1484.29	-0.703982	0.124576	-5.65101	1.59512e-08	6.64886e-07	no
WBGene00018169	40.7811	-2.05202	0.339124	-6.05093	1.44014e-09	7.41531e-08	no
WBGene00018170	91.1824	-1.40816	0.31498	-4.47065	7.79826e-06	0.000157323	no
WBGene00018174	2076.75	-0.793055	0.181231	-4.37593	1.20917e-05	0.000231491	no
WBGene00018189	81.3875	-1.42893	0.28141	-5.07776	3.81912e-07	1.14399e-05	no
WBGene00018200	128.23	-0.647128	0.222997	-2.90196	0.00370838	0.0276261	no
WBGene00018204	43.9368	0.684926	0.254568	2.69054	0.00713366	0.0460573	no
WBGene00018219	136.766	-1.03217	0.252646	-4.08544	4.39937e-05	0.000719051	no
WBGene00018232	60.4898	1.0155	0.273751	3.70958	0.0002076	0.00269781	no
WBGene00018250	318.555	1.13281	0.278321	4.07016	4.69809e-05	0.000761555	no
WBGene00018251	92.613	-1.13521	0.202197	-5.61437	1.97276e-08	7.92927e-07	no
WBGene00018256	398.075	-1.35318	0.268783	-5.03447	4.79165e-07	1.39294e-05	yes
WBGene00018259	371.712	0.783291	0.160707	4.87404	1.0934e-06	2.84283e-05	no
WBGene00018268	1579.3	0.645215	0.197753	3.26273	0.00110346	0.0106272	no
WBGene00018269	2528.27	0.711982	0.147091	4.8404	1.29578e-06	3.28237e-05	no
WBGene00018289	23.5009	-1.13623	0.314462	-3.61326	0.00030237	0.00371329	no
WBGene00018295	1193.31	-1.25512	0.25987	-4.8298	1.36668e-06	3.41801e-05	no
WBGene00018303	1147.97	0.787033	0.22117	3.5585	0.000372976	0.00439009	no
WBGene00018314	200.981	-1.10049	0.208904	-5.26794	1.37963e-07	4.63484e-06	no
WBGene00018318	84.2146	0.841695	0.250982	3.35361	0.000797652	0.00820889	no
WBGene00018343	1104.87	-1.01539	0.218323	-4.65088	3.30515e-06	7.54723e-05	no
WBGene00018358	21.5794	1.04774	0.323363	3.24012	0.00119477	0.0113814	no
WBGene00018375	489.729	1.6998	0.211017	8.05528	7.92994e-16	1.0679e-13	yes
WBGene00018380	167.675	1.01817	0.299945	3.39453	0.000687457	0.00725005	no
WBGene00018392	870.55	-0.739951	0.150722	-4.90938	9.13626e-07	2.45181e-05	yes
WBGene00018393	29090.6	-1.21451	0.13871	-8.75578	2.02697e-18	3.89475e-16	no
WBGene00018400	661.373	-0.7562	0.171599	-4.40679	1.04914e-05	0.000204583	no
WBGene00018412	22.6217	0.969016	0.336329	2.88115	0.00396222	0.0291043	no
WBGene00018424	1002.9	0.852085	0.245804	3.46652	0.000527233	0.00579294	no
WBGene00018448	13.7635	-1.12053	0.358645	-3.12434	0.00178206	0.015625	no
WBGene00018465	520.596	0.813963	0.186578	4.36258	1.28537e-05	0.000244004	no
WBGene00018466	115.01	0.707223	0.239306	2.9553	0.00312364	0.0239495	no
WBGene00018470	667.705	0.853188	0.256776	3.32269	0.00089155	0.00894161	yes
WBGene00018487	4795.27	-0.914754	0.238322	-3.83831	0.000123882	0.00176962	no
WBGene00018488	8435.63	-0.613316	0.144698	-4.23859	2.24932e-05	0.000401363	no
WBGene00018492	372.893	0.801566	0.244702	3.27568	0.00105409	0.0102411	no
WBGene00018535	78.7701	-1.71508	0.244204	-7.02314	2.16929e-12	1.75279e-10	no
WBGene00018538	1233.2	1.26728	0.19602	6.46506	1.0126e-10	6.23222e-09	no
WBGene00018566	947.2	1.01654	0.186756	5.44315	5.23453e-08	1.92699e-06	no
WBGene00018573	366.2	-1.4719	0.269043	-5.47088	4.47801e-08	1.66798e-06	no
WBGene00018576	922.096	0.884346	0.125767	7.03164	2.04123e-12	1.66641e-10	no
WBGene00018594	1154.8	0.851981	0.132482	6.4309	1.26848e-10	7.51362e-09	no
WBGene00018602	1354.66	1.37993	0.169056	8.16259	3.27906e-16	4.73989e-14	no
WBGene00018619	84.3016	1.56368	0.24134	6.47916	9.22366e-11	5.72158e-09	no
WBGene00018646	124.443	0.846524	0.250856	3.37455	0.000739376	0.00770987	no
WBGene00018708	126.208	-1.47952	0.209084	-7.07621	1.48153e-12	1.22858e-10	no
WBGene00018725	38.9368	0.919508	0.292875	3.1396	0.00169181	0.0149837	no
WBGene00018730	794.455	1.43021	0.196462	7.27984	3.3421e-13	2.99194e-11	no
WBGene00018731	1561.48	0.894951	0.16346	5.47506	4.37356e-08	1.63681e-06	no
WBGene00018735	3573.86	-0.735724	0.227823	-3.22937	0.00124065	0.0117615	no
WBGene00018737	10913.3	-0.753448	0.273822	-2.7516	0.00593048	0.0397789	no
WBGene00018744	3200.21	0.650779	0.133056	4.89101	1.0032e-06	2.65209e-05	no
WBGene00018783	50.1616	0.932448	0.297303	3.13636	0.00171062	0.0150741	no
WBGene00018803	120.531	1.40547	0.191363	7.34454	2.06461e-13	1.9479e-11	no
WBGene00018823	4150.84	0.80774	0.129956	6.21549	5.11635e-10	2.77976e-08	no
WBGene00018865	94.0267	2.18042	0.221268	9.85418	6.57486e-23	1.84988e-20	no
WBGene00018939	90.0527	-0.726865	0.237376	-3.06208	0.00219801	0.0182851	no
WBGene00018946	109.741	-2.1337	0.260341	-8.19582	2.48898e-16	3.7349e-14	no
WBGene00018966	432.364	0.603545	0.206869	2.91752	0.00352829	0.0264712	no
WBGene00018997	50.0946	1.53638	0.308906	4.97362	6.57129e-07	1.83595e-05	no
WBGene00019020	73.8729	1.13794	0.280449	4.05757	4.95865e-05	0.000798044	no
WBGene00019021	2012.2	1.26297	0.198231	6.37119	1.87572e-10	1.06692e-08	no
WBGene00019105	1924.31	0.821328	0.222002	3.69965	0.000215898	0.00278827	no
WBGene00019113	336.345	1.6919	0.231896	7.29592	2.96633e-13	2.67072e-11	no
WBGene00019154	6392.92	-0.959269	0.247398	-3.87743	0.000105564	0.0015462	no
WBGene00019169	27.5138	0.934186	0.34145	2.73594	0.0062202	0.0412351	no
WBGene00019183	58.8415	-2.12776	0.289313	-7.3545	1.91638e-13	1.82997e-11	no
WBGene00019184	7594.42	-0.795635	0.193945	-4.10237	4.08934e-05	0.000673972	no
WBGene00019185	798.304	0.668009	0.173617	3.84759	0.000119284	0.00171482	no
WBGene00019198	261.4	-0.717212	0.22639	-3.16804	0.0015347	0.013905	yes
WBGene00019215	120.599	-0.698365	0.200069	-3.49062	0.000481894	0.00539639	no
WBGene00019216	30.3129	1.27306	0.325965	3.90551	9.40253e-05	0.00139699	no
WBGene00019234	454.39	-0.841972	0.142004	-5.92921	3.04398e-09	1.47119e-07	no
WBGene00019235	17.5333	-0.937551	0.333444	-2.81172	0.00492773	0.0345072	no
WBGene00019236	3447.56	-0.887323	0.219284	-4.04645	5.20006e-05	0.000833491	no
WBGene00019280	2163.01	-0.817233	0.162224	-5.03767	4.71228e-07	1.37416e-05	yes
WBGene00019285	952.637	-1.01409	0.254249	-3.98859	6.64683e-05	0.00104103	no
WBGene00019298	3884.72	0.639559	0.151768	4.21405	2.50835e-05	0.000439617	no
WBGene00019306	216.113	-0.965067	0.27725	-3.48085	0.000499824	0.0055616	no
WBGene00019311	991.93	1.01212	0.269094	3.76121	0.000169096	0.00228694	no
WBGene00019314	195.912	0.874327	0.249745	3.50088	0.000463721	0.00524325	no
WBGene00019318	1141.49	-0.844567	0.258774	-3.26372	0.00109959	0.0106094	no
WBGene00019327	12388.8	0.614745	0.109716	5.60306	2.10594e-08	8.358e-07	no
WBGene00019372	57.4146	-1.69404	0.290693	-5.8276	5.62298e-09	2.60576e-07	no
WBGene00019375	63.0892	-0.897068	0.254836	-3.52017	0.000431263	0.00495261	no
WBGene00019376	64.6191	-1.06775	0.267018	-3.99879	6.36668e-05	0.00100313	no
WBGene00019388	122.937	1.31462	0.330763	3.97452	7.05218e-05	0.00109364	no
WBGene00019437	76.2151	-0.722659	0.213497	-3.38486	0.000712137	0.00748029	no
WBGene00019468	1375.45	0.877401	0.239064	3.67015	0.000242407	0.00307765	no
WBGene00019473	326.472	-0.949172	0.177211	-5.35616	8.50111e-08	2.94381e-06	no
WBGene00019478	1093.76	0.989495	0.151151	6.5464	5.89392e-11	3.86936e-09	no
WBGene00019489	3535.92	0.840795	0.263441	3.19159	0.00141491	0.0130829	no
WBGene00019495	1596.27	-1.04207	0.155675	-6.69386	2.1736e-11	1.5587e-09	no
WBGene00019508	69.1149	1.13844	0.272839	4.17257	3.01177e-05	0.000515798	no
WBGene00019509	347.771	0.792459	0.219926	3.6033	0.000314201	0.00382282	no
WBGene00019515	1860.17	1.86129	0.155088	12.0015	3.49108e-33	1.96448e-30	no
WBGene00019520	1606.28	-1.16891	0.268675	-4.35064	1.35741e-05	0.000256136	yes
WBGene00019532	90.6265	-0.630264	0.213163	-2.95673	0.00310924	0.0238802	no
WBGene00019540	11378.1	1.0248	0.272074	3.76662	0.000165471	0.00224175	no
WBGene00019547	243.368	-2.69276	0.191153	-14.0869	4.56995e-45	3.78969e-42	no
WBGene00019550	362.995	-1.75096	0.235287	-7.44182	9.93042e-14	1.00297e-11	no
WBGene00019564	105.677	1.29609	0.238002	5.4457	5.16021e-08	1.90408e-06	no
WBGene00019579	368.276	0.641627	0.226832	2.82865	0.00467452	0.0330911	no
WBGene00019584	66.909	0.698222	0.250993	2.78183	0.00540528	0.0372227	no
WBGene00019597	274.638	0.792187	0.267848	2.9576	0.0031004	0.0238408	no
WBGene00019619	3086.19	-2.1273	0.128341	-16.5753	1.05151e-61	1.65676e-58	no
WBGene00019653	207.882	-1.40324	0.238732	-5.87792	4.15456e-09	1.95401e-07	no
WBGene00019672	96.7415	1.18034	0.301832	3.91059	9.20716e-05	0.00137636	no
WBGene00019721	182.233	0.706503	0.251328	2.81108	0.0049375	0.034545	no
WBGene00019731	90.628	-0.858807	0.283959	-3.02441	0.00249122	0.0200981	no
WBGene00019732	88.3097	0.616221	0.215446	2.8602	0.00423368	0.0306835	no
WBGene00019738	2742.2	0.98523	0.133539	7.37783	1.60885e-13	1.55516e-11	no
WBGene00019780	3164.78	0.868399	0.153461	5.65875	1.52482e-08	6.42992e-07	no
WBGene00019782	40.2581	0.80837	0.273349	2.95728	0.00310368	0.0238545	no
WBGene00019818	58.1423	1.73488	0.267366	6.48879	8.65291e-11	5.38875e-09	no
WBGene00019837	526.138	0.608149	0.156859	3.87704	0.000105734	0.0015462	no
WBGene00019854	66.0329	0.961178	0.252916	3.80038	0.000144476	0.00200385	no
WBGene00019855	1283.34	0.659948	0.134434	4.90909	9.14993e-07	2.45181e-05	no
WBGene00019866	89.3715	-1.28903	0.247336	-5.21164	1.87174e-07	6.02772e-06	no
WBGene00019901	483.638	-1.07619	0.275483	-3.90656	9.36189e-05	0.00139342	no
WBGene00019912	88.8474	1.31709	0.310539	4.24129	2.22241e-05	0.000397461	no
WBGene00019913	38.2994	1.00921	0.310296	3.25239	0.00114439	0.0109945	no
WBGene00019931	23.4868	-0.91668	0.326044	-2.81153	0.00493072	0.0345128	no
WBGene00019937	1881.78	-0.600348	0.151693	-3.95766	7.56875e-05	0.00116005	no
WBGene00019949	25.8917	0.961106	0.310169	3.09866	0.00194401	0.0166738	no
WBGene00019967	1638.03	2.66623	0.132884	20.0643	1.51273e-89	5.95865e-86	no
WBGene00019968	129.343	1.55598	0.190567	8.16499	3.21472e-16	4.68991e-14	no
WBGene00019977	95.1897	-0.797217	0.251069	-3.17529	0.00149688	0.0136504	no
WBGene00019997	240.986	0.720047	0.192886	3.73302	0.000189201	0.00250509	no
WBGene00020006	721.052	-0.780052	0.157811	-4.94295	7.69491e-07	2.1159e-05	no
WBGene00020007	1938.69	1.2459	0.160993	7.73887	1.00308e-14	1.17944e-12	no
WBGene00020014	407.455	-0.866712	0.259817	-3.33585	0.000850381	0.00863312	no
WBGene00020016	33.4242	-1.42461	0.284359	-5.00991	5.44552e-07	1.55716e-05	no
WBGene00020039	5464.06	-1.71477	0.217562	-7.88174	3.22846e-15	3.94322e-13	no
WBGene00020040	5967.42	-1.88199	0.216307	-8.70055	3.30279e-18	6.1222e-16	no
WBGene00020047	1622.59	1.24106	0.2711	4.57787	4.69739e-06	0.000102687	no
WBGene00020049	1614.31	1.37001	0.277218	4.942	7.73269e-07	2.12258e-05	no
WBGene00020052	257.69	-0.806094	0.230473	-3.49756	0.000469541	0.0052957	no
WBGene00020080	32.4032	-1.30778	0.310521	-4.21158	2.53595e-05	0.000443468	no
WBGene00020105	97.8538	-0.790089	0.242145	-3.26287	0.00110289	0.0106272	no
WBGene00020107	13131.3	-0.830218	0.14654	-5.66546	1.4663e-08	6.26097e-07	no
WBGene00020117	37.6433	0.859946	0.317067	2.71219	0.00668405	0.0436987	no
WBGene00020135	250.29	0.631511	0.166025	3.80372	0.00014254	0.00198048	no
WBGene00020140	179.781	1.27737	0.287887	4.43706	9.11964e-06	0.000180514	no
WBGene00020143	1133.57	0.737358	0.236945	3.11194	0.00185859	0.0161433	yes
WBGene00020148	1372.79	-0.999014	0.142666	-7.00248	2.51477e-12	1.99109e-10	no
WBGene00020149	3736.92	-0.714415	0.23749	-3.00819	0.00262809	0.0209614	no
WBGene00020153	173.007	0.917686	0.174427	5.26114	1.43162e-07	4.7891e-06	no
WBGene00020156	1195.31	1.33437	0.172795	7.72231	1.14243e-14	1.33335e-12	no
WBGene00020166	5926.87	-0.622549	0.0954162	-6.52457	6.81967e-11	4.44011e-09	no
WBGene00020182	144.012	-1.39028	0.304778	-4.56161	5.07635e-06	0.000110169	no
WBGene00020188	117.292	0.605463	0.201754	3.001	0.00269096	0.0213381	yes
WBGene00020194	2368.14	-1.14217	0.24787	-4.60794	4.06671e-06	9.05395e-05	no
WBGene00020219	803.799	1.43849	0.261184	5.50759	3.63774e-08	1.3712e-06	no
WBGene00020224	165.819	0.644085	0.226255	2.84672	0.00441723	0.0317654	no
WBGene00020242	120.575	0.998938	0.209291	4.77297	1.81532e-06	4.40712e-05	no
WBGene00020250	363.806	-0.671748	0.213953	-3.13969	0.00169125	0.0149837	no
WBGene00020256	755.496	-0.623966	0.120942	-5.15921	2.47994e-07	7.70688e-06	no
WBGene00020258	1097.96	-1.35112	0.114346	-11.816	3.22513e-32	1.75224e-29	no
WBGene00020270	455.177	-0.666548	0.224653	-2.96702	0.00300703	0.0233008	no
WBGene00020277	152.02	0.672099	0.252361	2.66325	0.00773907	0.0489285	no
WBGene00020315	1663.42	0.667826	0.189038	3.53277	0.000411233	0.00476075	no
WBGene00020324	279.25	0.703614	0.18392	3.82566	0.000130423	0.00184798	no
WBGene00020335	761.148	0.949391	0.25764	3.68495	0.00022875	0.002935	no
WBGene00020339	1588.57	1.28484	0.253097	5.07647	3.84519e-07	1.14962e-05	no
WBGene00020343	645.482	-0.684427	0.234473	-2.919	0.00351156	0.0263593	no
WBGene00020365	322.172	-0.698991	0.180265	-3.87757	0.000105505	0.0015462	yes
WBGene00020378	318.379	-0.738475	0.141427	-5.22162	1.77365e-07	5.76199e-06	yes
WBGene00020381	117.591	-1.7422	0.234565	-7.42738	1.10768e-13	1.09079e-11	no
WBGene00020386	63.4867	-1.10253	0.243663	-4.52482	6.04477e-06	0.000128013	no
WBGene00020394	34.0798	0.908519	0.294398	3.08602	0.00202856	0.0172955	no
WBGene00020407	198.617	0.829731	0.165179	5.02321	5.08139e-07	1.46269e-05	no
WBGene00020435	25.2511	1.01679	0.325557	3.12322	0.00178887	0.015676	no
WBGene00020445	504.487	0.880835	0.266826	3.30116	0.000962855	0.00951143	no
WBGene00020478	423.494	-0.612484	0.192167	-3.18724	0.00143636	0.0132347	no
WBGene00020482	74.4747	-0.631619	0.208944	-3.0229	0.00250363	0.020157	no
WBGene00020491	450.923	-0.657651	0.147263	-4.46582	7.97623e-06	0.000160298	no
WBGene00020516	3211.94	-1.01755	0.124068	-8.20153	2.37348e-16	3.59582e-14	no
WBGene00020528	935.673	-0.98309	0.114479	-8.58754	8.88523e-18	1.60915e-15	no
WBGene00020532	100.465	-0.672236	0.198118	-3.39311	0.000691036	0.00727805	no
WBGene00020551	2782.28	-0.927563	0.231279	-4.01059	6.05682e-05	0.00096104	no
WBGene00020560	3175.45	-1.16121	0.249414	-4.65573	3.22827e-06	7.39312e-05	no
WBGene00020566	637.385	1.75157	0.219107	7.99412	1.30502e-15	1.69934e-13	no
WBGene00020569	573.87	0.719425	0.187935	3.82806	0.000129157	0.00183333	no
WBGene00020571	1510.66	-1.0824	0.226167	-4.78585	1.70266e-06	4.15281e-05	no
WBGene00020587	247.166	-1.16676	0.170679	-6.83602	8.14253e-12	6.10923e-10	no
WBGene00020593	179.641	0.795864	0.284896	2.79353	0.00521362	0.0361398	no
WBGene00020616	1581.42	0.639471	0.183559	3.48373	0.000494482	0.00550994	no
WBGene00020618	736.039	1.32754	0.186178	7.13048	1.00016e-12	8.53357e-11	no
WBGene00020619	43.914	0.788193	0.281712	2.79787	0.00514405	0.0357147	no
WBGene00020620	203.665	0.744534	0.168489	4.4189	9.92064e-06	0.000195143	no
WBGene00020625	768.852	-0.651959	0.172999	-3.76856	0.000164191	0.00222633	no
WBGene00020635	52.8847	1.07241	0.326261	3.28696	0.00101275	0.0099296	no
WBGene00020646	321.142	-1.17356	0.22757	-5.15693	2.5103e-07	7.77282e-06	no
WBGene00020651	896.108	0.798338	0.236811	3.3712	0.000748417	0.00778868	no
WBGene00020658	2519.87	0.827901	0.193862	4.27057	1.94972e-05	0.000353507	no
WBGene00020674	414.238	-0.759794	0.269714	-2.81703	0.00484698	0.0340174	no
WBGene00020677	119.285	0.852756	0.24573	3.47029	0.000519895	0.00572903	no
WBGene00020678	2644.03	0.757326	0.169013	4.48089	7.43335e-06	0.000151122	no
WBGene00020688	289.595	-1.06357	0.141831	-7.49881	6.43983e-14	6.6754e-12	no
WBGene00020691	333.046	0.594661	0.208891	2.84676	0.00441672	0.0317654	no
WBGene00020700	18.7583	1.04978	0.326572	3.21454	0.00130654	0.0122901	no
WBGene00020703	389.811	-0.639977	0.134109	-4.77207	1.82345e-06	4.41238e-05	no
WBGene00020707	133.695	1.10856	0.302109	3.66942	0.000243105	0.00308403	no
WBGene00020710	806.841	0.619566	0.132994	4.6586	3.18375e-06	7.32308e-05	no
WBGene00020774	124.878	2.27399	0.196211	11.5895	4.65617e-31	2.29258e-28	no
WBGene00020847	2810.74	-0.616155	0.0828919	-7.43323	1.05976e-13	1.05017e-11	no
WBGene00020862	2183.8	-0.587389	0.153827	-3.81851	0.000134259	0.00188703	no
WBGene00020870	29.3625	1.57862	0.305525	5.1669	2.38004e-07	7.42573e-06	no
WBGene00020881	32.5491	1.52039	0.294137	5.16899	2.3536e-07	7.37242e-06	no
WBGene00020882	27.9237	1.36503	0.298765	4.56889	4.90303e-06	0.000106555	no
WBGene00020889	629.146	-0.598951	0.117162	-5.11217	3.18482e-07	9.68727e-06	no
WBGene00020893	596.475	-0.585562	0.214982	-2.72378	0.00645403	0.0424592	no
WBGene00020904	307.518	0.734116	0.132444	5.54282	2.97641e-08	1.15794e-06	no
WBGene00020911	922.098	-0.598899	0.16424	-3.64649	0.000265852	0.00333766	yes
WBGene00020930	6094.17	0.586897	0.17194	3.41338	0.000641626	0.00683996	yes
WBGene00020947	1859.72	-0.810742	0.185692	-4.36605	1.26515e-05	0.000240455	yes
WBGene00020966	96.5814	1.14696	0.289678	3.95943	7.51299e-05	0.00115263	no
WBGene00020991	19.9736	1.17992	0.335106	3.52104	0.000429862	0.00494734	no
WBGene00021011	90.9454	0.806014	0.273028	2.95213	0.00315591	0.0241499	no
WBGene00021071	677.347	0.730942	0.135925	5.37753	7.55152e-08	2.66179e-06	no
WBGene00021083	1440.43	2.50972	0.189347	13.2546	4.24218e-40	3.03817e-37	no
WBGene00021084	2144.07	1.32389	0.181202	7.30619	2.74825e-13	2.51753e-11	no
WBGene00021086	121.862	1.16303	0.256156	4.54032	5.61693e-06	0.000120573	no
WBGene00021095	15051.1	-0.664687	0.226672	-2.93237	0.00336381	0.0254686	no
WBGene00021121	167.91	1.96098	0.26308	7.45394	9.05957e-14	9.26417e-12	no
WBGene00021122	30.4697	1.6666	0.329124	5.06376	4.11065e-07	1.21725e-05	no
WBGene00021156	348.486	0.860817	0.247119	3.48341	0.000495067	0.00551257	no
WBGene00021157	219.701	0.640959	0.179412	3.57254	0.00035353	0.00421029	no
WBGene00021160	1329.04	-1.1332	0.221167	-5.12373	2.99553e-07	9.20029e-06	no
WBGene00021167	139.881	1.33551	0.285645	4.67541	2.93367e-06	6.77754e-05	no
WBGene00021171	207.882	1.17687	0.266459	4.41672	1.00212e-05	0.000196875	no
WBGene00021186	233.902	0.759765	0.208916	3.6367	0.000276152	0.00344502	no
WBGene00021193	34.7902	-0.827505	0.306054	-2.70379	0.00685541	0.0446436	no
WBGene00021213	2230.43	-0.642855	0.238939	-2.69046	0.00713543	0.0460573	no
WBGene00021214	175.672	0.723612	0.175372	4.12616	3.68873e-05	0.000615674	no
WBGene00021215	307.207	0.78971	0.173317	4.55645	5.20251e-06	0.000112752	no
WBGene00021245	90.7778	0.681053	0.215573	3.15927	0.00158167	0.0142649	no
WBGene00021265	37.7445	0.843815	0.314164	2.6859	0.00723339	0.0464423	no
WBGene00021287	81.9453	0.697164	0.225366	3.09347	0.00197831	0.0169219	no
WBGene00021321	538.664	-0.666319	0.156828	-4.24873	2.14982e-05	0.000385792	no
WBGene00021326	2500.05	-1.14179	0.266193	-4.28932	1.79219e-05	0.000328728	no
WBGene00021337	123.661	-1.2992	0.241427	-5.38134	7.39341e-08	2.61776e-06	no
WBGene00021339	70.2007	0.844043	0.24295	3.47414	0.000512498	0.00567059	no
WBGene00021379	273.125	-1.35293	0.236054	-5.73145	9.95753e-09	4.43194e-07	no
WBGene00021389	1378.75	-1.08875	0.284903	-3.82147	0.000132661	0.0018696	no
WBGene00021519	259.323	0.713768	0.213148	3.3487	0.000811914	0.00832304	no
WBGene00021520	154.518	1.00724	0.186497	5.40085	6.63263e-08	2.37508e-06	no
WBGene00021529	470.947	1.17272	0.252873	4.63759	3.52502e-06	7.9809e-05	no
WBGene00021532	348.387	-0.585478	0.143479	-4.08057	4.49254e-05	0.000733518	no
WBGene00021533	653.585	0.640934	0.172886	3.70726	0.000209516	0.00271698	no
WBGene00021553	35.298	1.29842	0.344146	3.77286	0.000161387	0.00219209	no
WBGene00021580	56.9601	1.83939	0.327966	5.60848	2.04114e-08	8.16248e-07	no
WBGene00021586	46.0565	-0.832577	0.27146	-3.06703	0.00216197	0.0180711	no
WBGene00021587	97.2862	-0.855956	0.21699	-3.94468	7.9905e-05	0.00121758	no
WBGene00021600	118.989	0.884631	0.193527	4.57109	4.85188e-06	0.000105667	no
WBGene00021639	53.6194	0.730994	0.251216	2.90982	0.00361637	0.0270558	no
WBGene00021675	2326.67	0.792357	0.172539	4.59233	4.3832e-06	9.69967e-05	no
WBGene00021690	2658.5	-1.02757	0.1892	-5.43117	5.59869e-08	2.04197e-06	no
WBGene00021698	1814.28	0.755657	0.19665	3.84265	0.000121714	0.00174657	no
WBGene00021731	139.249	1.31282	0.235091	5.5843	2.34643e-08	9.21953e-07	no
WBGene00021740	136.286	0.814404	0.185222	4.39691	1.09805e-05	0.000212541	no
WBGene00021741	30.026	0.83306	0.304896	2.73227	0.00628992	0.0416054	no
WBGene00021791	540.612	0.896383	0.219801	4.07816	4.53926e-05	0.000740378	no
WBGene00021835	3921.62	0.705968	0.160346	4.40277	1.06876e-05	0.000207637	no
WBGene00021858	178.212	1.16569	0.230233	5.06307	4.1255e-07	1.21725e-05	no
WBGene00021872	1003.35	0.948857	0.147057	6.4523	1.10168e-10	6.62521e-09	no
WBGene00021873	61.745	-0.666367	0.249267	-2.6733	0.00751084	0.0478144	no
WBGene00021875	501.85	-1.25659	0.191308	-6.56844	5.08466e-11	3.38033e-09	no
WBGene00021876	1348.83	1.20463	0.20731	5.81076	6.21892e-09	2.87347e-07	no
WBGene00021883	6677.06	0.658019	0.137069	4.80066	1.58145e-06	3.91167e-05	no
WBGene00021892	31.0779	-1.26001	0.32097	-3.92564	8.64996e-05	0.00130171	no
WBGene00021909	2330.59	0.607508	0.128348	4.7333	2.20901e-06	5.24964e-05	no
WBGene00021977	628.4	1.3603	0.230782	5.89431	3.76241e-09	1.79095e-07	no
WBGene00021978	37.1165	1.50281	0.298625	5.03242	4.84334e-07	1.40279e-05	no
WBGene00021979	87.9015	1.27066	0.224683	5.65534	1.5554e-08	6.53363e-07	no
WBGene00022018	315.314	-0.699697	0.242487	-2.88551	0.00390781	0.0287987	no
WBGene00022024	562.475	-0.8827	0.269246	-3.27841	0.00104394	0.0101659	no
WBGene00022040	42.5552	1.37376	0.28787	4.77216	1.82263e-06	4.41238e-05	no
WBGene00022072	4031.39	-0.594378	0.172963	-3.43645	0.000589392	0.00638683	no
WBGene00022076	203.308	-0.969046	0.168393	-5.75467	8.68096e-09	3.88572e-07	no
WBGene00022079	63.9007	1.19125	0.31942	3.72942	0.000191922	0.00253261	no
WBGene00022083	15.5113	1.07082	0.339222	3.15669	0.00159572	0.0143505	no
WBGene00022101	476.209	0.99426	0.233986	4.24923	2.14502e-05	0.00038537	no
WBGene00022130	301.695	-1.00057	0.180849	-5.53259	3.1554e-08	1.2126e-06	no
WBGene00022131	1234.16	0.757819	0.176239	4.29996	1.70832e-05	0.000316291	no
WBGene00022142	56.4074	0.94731	0.284469	3.3301	0.000868164	0.00876845	no
WBGene00022155	1533.77	-0.853132	0.205897	-4.14349	3.42057e-05	0.000577648	no
WBGene00022181	502.426	1.51073	0.26131	5.78134	7.41071e-09	3.36493e-07	yes
WBGene00022230	180.428	-0.726083	0.207184	-3.50453	0.000457417	0.00518494	no
WBGene00022385	26.5499	0.989965	0.32787	3.01938	0.00253288	0.0203405	no
WBGene00022386	857.804	1.40678	0.176871	7.95372	1.8099e-15	2.28135e-13	no
WBGene00022388	4359.25	1.0442	0.188995	5.52502	3.29452e-08	1.25687e-06	no
WBGene00022389	7519.19	0.998745	0.211977	4.71157	2.45817e-06	5.80673e-05	no
WBGene00022390	517.913	0.871388	0.195524	4.45667	8.32429e-06	0.000166233	no
WBGene00022391	508.432	1.22211	0.203648	6.0011	1.95983e-09	9.74105e-08	no
WBGene00022415	2256.08	-1.33427	0.236262	-5.64742	1.62876e-08	6.74398e-07	no
WBGene00022519	1424.2	1.16849	0.20603	5.67147	1.41578e-08	6.07822e-07	no
WBGene00022548	40.6607	-0.981372	0.283556	-3.46095	0.00053828	0.00588968	no
WBGene00022549	420.34	-0.621247	0.158027	-3.93127	8.44999e-05	0.00127772	no
WBGene00022562	755.642	-0.6596	0.198496	-3.32298	0.000890603	0.0089378	no
WBGene00022572	41.0699	0.896934	0.26705	3.35867	0.000783176	0.00807832	no
WBGene00022577	507.956	-0.969423	0.255536	-3.79369	0.000148427	0.00204604	no
WBGene00022592	610.187	0.608182	0.163816	3.71258	0.000205154	0.00267141	yes
WBGene00022597	193.462	1.84968	0.17955	10.3017	6.92049e-25	2.27165e-22	no
WBGene00022609	147.386	0.614491	0.209149	2.93805	0.00330283	0.0250792	no
WBGene00022611	858.842	-0.792569	0.250754	-3.16075	0.00157366	0.0142008	no
WBGene00022612	267.178	-0.812397	0.283158	-2.86905	0.00411701	0.0299883	no
WBGene00022626	224.402	-0.931936	0.230914	-4.03586	5.44027e-05	0.000868459	no
WBGene00022627	207.665	-0.954309	0.268085	-3.55972	0.000371245	0.00438153	no
WBGene00022649	16918.2	1.29086	0.214369	6.02171	1.72589e-09	8.74377e-08	no
WBGene00022657	67.499	-0.8074	0.256671	-3.14566	0.00165712	0.014793	no
WBGene00022680	25859.2	-0.955162	0.273199	-3.49621	0.000471922	0.00531874	no
WBGene00022753	39.0423	1.22284	0.322115	3.79627	0.000146888	0.00203193	no
WBGene00022845	175.868	-1.01111	0.255527	-3.95695	7.59126e-05	0.00116237	no
WBGene00022848	1925.81	0.60836	0.108493	5.60738	2.05407e-08	8.1934e-07	no
WBGene00022860	305.805	-0.632863	0.205378	-3.08146	0.00205989	0.0174963	no
WBGene00022968	171.565	-1.07699	0.239007	-4.50609	6.60333e-06	0.000137259	no
WBGene00023069	1339.59	0.701348	0.176624	3.97086	7.16142e-05	0.00110732	no
WBGene00023209	9135.11	0.839186	0.170919	4.90984	9.11503e-07	2.45079e-05	no
WBGene00023263	159.011	-0.738615	0.192148	-3.84399	0.000121051	0.00173863	no
WBGene00023271	68.9411	-1.28357	0.308493	-4.16078	3.17162e-05	0.000539072	no
WBGene00023423	20.2654	1.04833	0.323719	3.2384	0.00120204	0.0114369	no
WBGene00023425	53.0409	-0.930822	0.266896	-3.48758	0.000487409	0.00544126	no
WBGene00023483	13.5711	1.04039	0.345756	3.00902	0.00262096	0.0209411	no
WBGene00023489	601.135	-0.7165	0.123366	-5.80791	6.3259e-09	2.91435e-07	no
WBGene00023492	282.087	0.654842	0.234166	2.79648	0.00516618	0.0358309	no
WBGene00023501	139.359	1.62656	0.253956	6.40491	1.50462e-10	8.6838e-09	no
WBGene00023503	155.219	1.30885	0.201	6.51171	7.42988e-11	4.79776e-09	no
WBGene00043049	110.889	-0.653084	0.225321	-2.89846	0.00374998	0.0278439	no
WBGene00043062	719.285	-0.587505	0.174307	-3.37052	0.000750267	0.00779898	no
WBGene00043534	95.6189	-1.31559	0.208944	-6.29639	3.04661e-10	1.70221e-08	no
WBGene00043980	82.7595	-1.68207	0.272746	-6.16717	6.95243e-10	3.7133e-08	no
WBGene00043995	84.4727	0.701807	0.226151	3.10327	0.00191395	0.0164429	no
WBGene00044024	46.5035	-1.49083	0.26506	-5.62448	1.86071e-08	7.5366e-07	no
WBGene00044029	239.815	0.640746	0.148324	4.3199	1.56101e-05	0.000291414	no
WBGene00044034	19.6461	1.238	0.357997	3.45813	0.000543948	0.00594345	no
WBGene00044043	270.299	-0.828558	0.294921	-2.80942	0.00496311	0.0346779	no
WBGene00044045	149.682	-0.629126	0.215234	-2.92298	0.00346698	0.0260743	no
WBGene00044067	663.684	0.626562	0.122314	5.12256	3.01419e-07	9.2396e-06	no
WBGene00044074	62.9172	-1.61744	0.30716	-5.26579	1.39588e-07	4.67947e-06	no
WBGene00044109	15245.4	-1.40018	0.269269	-5.19992	1.99372e-07	6.34608e-06	no
WBGene00044132	112.346	1.29855	0.229702	5.65317	1.5752e-08	6.58324e-07	no
WBGene00044153	19.1359	-0.938004	0.332177	-2.82381	0.00474571	0.0335006	no
WBGene00044206	567.438	2.64989	0.236781	11.1913	4.49737e-29	1.91515e-26	no
WBGene00044350	393.892	0.655462	0.184924	3.5445	0.00039336	0.00458755	no
WBGene00044376	52.2423	1.22165	0.312179	3.91332	9.10373e-05	0.00136348	no
WBGene00044395	316.022	-1.17772	0.278597	-4.22731	2.36499e-05	0.000417744	no
WBGene00044445	761.592	-1.96275	0.207143	-9.47534	2.65898e-21	6.44536e-19	no
WBGene00044492	70.3503	0.699187	0.228814	3.0557	0.00224534	0.0185935	no
WBGene00044502	111.248	0.693297	0.192056	3.60986	0.000306363	0.00374718	no
WBGene00044512	131.493	0.887023	0.251483	3.52716	0.00042004	0.00485558	no
WBGene00044521	43.7954	-2.27729	0.286224	-7.95631	1.7725e-15	2.25222e-13	no
WBGene00044527	117.674	-0.925561	0.192825	-4.8	1.58666e-06	3.91841e-05	no
WBGene00044530	487.226	-1.12918	0.229918	-4.91124	9.05028e-07	2.43754e-05	no
WBGene00044536	194.699	1.20592	0.276202	4.36607	1.26504e-05	0.000240455	no
WBGene00044574	164.786	-1.01722	0.25238	-4.03051	5.56549e-05	0.000886652	no
WBGene00044607	278.755	-0.751245	0.157578	-4.76745	1.86574e-06	4.49489e-05	no
WBGene00044617	76.2081	-0.88913	0.282429	-3.14816	0.00164303	0.0146963	no
WBGene00044620	1259.79	-0.67129	0.234901	-2.85776	0.00426643	0.0308641	no
WBGene00044640	237.271	0.777281	0.147828	5.25799	1.45635e-07	4.84098e-06	no
WBGene00044644	1543.42	2.41724	0.174425	13.8583	1.13347e-43	8.9295e-41	no
WBGene00044646	211.353	3.30282	0.219858	15.0225	5.23155e-51	5.15177e-48	no
WBGene00044658	60.5798	1.53048	0.343434	4.45639	8.33497e-06	0.000166235	no
WBGene00044707	47.6325	0.941454	0.256132	3.67567	0.00023723	0.00302411	no
WBGene00044712	68.2913	1.12303	0.226825	4.95107	7.38066e-07	2.0366e-05	no
WBGene00044723	64.1686	-1.14055	0.254464	-4.48218	7.38848e-06	0.000150404	no
WBGene00044724	3071.39	0.79968	0.212334	3.76614	0.000165792	0.00224417	no
WBGene00044737	1289.74	0.794111	0.117426	6.76266	1.35484e-11	9.9288e-10	no
WBGene00044788	154.003	0.686855	0.256804	2.67462	0.00748132	0.0476458	no
WBGene00044792	343.383	-0.68758	0.143386	-4.79531	1.62424e-06	3.99867e-05	no
WBGene00044803	97.4503	-0.692732	0.2434	-2.84606	0.00442637	0.031802	no
WBGene00044898	209.395	-0.637932	0.208498	-3.05966	0.00221592	0.0184049	yes
WBGene00044901	399.473	2.8639	0.190542	15.0303	4.64688e-51	4.88108e-48	no
WBGene00044984	70.3279	-1.15034	0.304648	-3.77595	0.000159398	0.00216693	no
WBGene00044997	25.239	1.30499	0.313689	4.16013	3.18064e-05	0.000539471	no
WBGene00045067	45.5567	-1.0485	0.33886	-3.0942	0.00197346	0.0168897	no
WBGene00045096	101.023	1.81294	0.308985	5.86739	4.42721e-09	2.06989e-07	no
WBGene00045146	261.151	-0.846558	0.182827	-4.63038	3.6499e-06	8.23895e-05	no
WBGene00045183	29.4296	1.46698	0.297761	4.92671	8.36254e-07	2.27565e-05	no
WBGene00045253	307.267	0.847433	0.237916	3.5619	0.000368183	0.00435135	no
WBGene00045269	176.694	-0.750446	0.24122	-3.11105	0.00186426	0.0161569	no
WBGene00045275	379.001	-0.897628	0.281077	-3.19353	0.00140543	0.0130182	no
WBGene00045289	21.802	-0.918675	0.329863	-2.78502	0.00535241	0.0369394	no
WBGene00045322	25.7019	1.14744	0.325937	3.52044	0.000430839	0.00495255	no
WBGene00045411	136.336	2.12612	0.281588	7.55047	4.33702e-14	4.68042e-12	no
WBGene00045412	35.1761	1.52588	0.296092	5.15341	2.55794e-07	7.90253e-06	no
WBGene00045416	1010.58	2.65015	0.177245	14.9519	1.51419e-50	1.40338e-47	no
WBGene00045457	104.608	2.70048	0.253762	10.6418	1.90392e-26	6.66624e-24	no
WBGene00045493	29.375	-0.862793	0.310795	-2.77608	0.00550186	0.0376278	no
WBGene00045497	211.627	-0.652089	0.245476	-2.65643	0.00789737	0.0498122	no
WBGene00047837	100.834	-0.893829	0.254931	-3.50616	0.000454627	0.00516819	no
WBGene00047854	81.2764	-1.23562	0.2778	-4.44787	8.67278e-06	0.000172318	no
WBGene00049844	21.1255	-0.878789	0.329967	-2.66326	0.00773874	0.0489285	no
WBGene00050105	29.6505	0.832298	0.304037	2.73749	0.00619104	0.0411066	no
WBGene00050934	75.1691	-0.688402	0.229536	-2.9991	0.00270779	0.0214607	no
WBGene00050943	228.876	-1.25253	0.163604	-7.65585	1.92035e-14	2.17676e-12	no
WBGene00050945	37.5271	1.12823	0.287068	3.93017	8.48874e-05	0.00128235	no
WBGene00077504	25.6327	-0.876037	0.298017	-2.93955	0.00328687	0.0250062	no
WBGene00077593	24.2591	1.27394	0.310078	4.10846	3.98308e-05	0.000659216	no
WBGene00077684	22.8259	-0.848118	0.30818	-2.75202	0.00592289	0.0397618	no
WBGene00077714	79.7638	-0.810663	0.21754	-3.7265	0.000194153	0.00254923	no
WBGene00077757	303.76	-0.974171	0.207331	-4.69861	2.61932e-06	6.10503e-05	no
WBGene00077783	48.456	-1.02475	0.267849	-3.82585	0.000130319	0.00184798	no
WBGene00086568	20.2805	-0.905467	0.330336	-2.74105	0.00612425	0.0407146	no
WBGene00165214	58.5123	-0.76587	0.269918	-2.83741	0.00454806	0.0323664	no
WBGene00166444	81.1151	-1.24571	0.277423	-4.49031	7.11196e-06	0.000145717	no
WBGene00167059	17.5418	-1.59496	0.338959	-4.70546	2.53295e-06	5.93004e-05	no
WBGene00167648	227.01	-1.75524	0.205592	-8.53748	1.37185e-17	2.37525e-15	no
WBGene00168065	81.6475	1.66657	0.25681	6.48952	8.61097e-11	5.3839e-09	no
WBGene00168659	76.0883	0.845414	0.274446	3.08043	0.002067	0.0175408	no
WBGene00169377	306.702	-0.648037	0.177553	-3.64982	0.000262424	0.00330252	no
WBGene00169674	38.5106	-0.973575	0.307082	-3.17041	0.00152226	0.013824	no
WBGene00170809	1127.7	-1.00138	0.179248	-5.58659	2.31576e-08	9.12177e-07	no
WBGene00170992	501.792	-0.595553	0.151935	-3.9198	8.86233e-05	0.00133112	no
WBGene00171046	168.964	-0.889286	0.301157	-2.9529	0.00314803	0.0241095	no
WBGene00171638	75.2727	-0.850841	0.214628	-3.96425	7.36261e-05	0.00113176	no
WBGene00172388	282.006	-0.910401	0.19827	-4.59173	4.39597e-06	9.7143e-05	no
WBGene00173002	70.58	1.47807	0.302932	4.87922	1.06506e-06	2.78756e-05	no
WBGene00173347	91.0298	-0.591879	0.206535	-2.86575	0.00416017	0.0302279	no
WBGene00174257	65.4546	-0.67122	0.241696	-2.77712	0.00548426	0.0375859	no
WBGene00174339	37.7329	1.51381	0.329764	4.59057	4.42041e-06	9.7253e-05	no
WBGene00175027	842.155	-0.928328	0.243436	-3.81343	0.000137049	0.00191771	no
WBGene00184956	130.566	-1.14654	0.200633	-5.71463	1.09943e-08	4.82524e-07	no
WBGene00189956	15.7229	-1.03802	0.341621	-3.03851	0.00237754	0.0194446	no
WBGene00189973	33.4634	1.06774	0.345335	3.0919	0.00198878	0.0169839	no
WBGene00194641	132.264	0.751092	0.280164	2.6809	0.00734249	0.0469265	no
WBGene00194651	116.83	0.762076	0.214167	3.55833	0.000373215	0.00439009	no
WBGene00194664	50.4585	-0.800865	0.267914	-2.98926	0.00279651	0.0219431	no
WBGene00194674	147.847	-0.833253	0.229971	-3.62329	0.000290875	0.00361153	no
WBGene00194695	24.822	1.12493	0.305917	3.67724	0.000235773	0.00301285	no
WBGene00194708	193.97	1.26977	0.193004	6.57899	4.73644e-11	3.16217e-09	no
WBGene00194717	39.9978	0.855639	0.285818	2.99365	0.00275661	0.0217166	no
WBGene00194855	175.937	-0.65314	0.153414	-4.25738	2.06839e-05	0.000372452	no
WBGene00194869	106.242	1.80359	0.223112	8.0838	6.27797e-16	8.52722e-14	no
WBGene00194908	580.904	-0.622404	0.230419	-2.70119	0.00690924	0.0449286	no
WBGene00194926	85.8452	0.962329	0.227495	4.23012	2.3357e-05	0.000413993	no
WBGene00194928	150.529	2.03407	0.317447	6.4076	1.47832e-10	8.56338e-09	no
WBGene00194952	29.1698	-1.03517	0.316846	-3.26711	0.00108653	0.0105027	no
WBGene00195051	164.708	-1.09292	0.26721	-4.09014	4.31115e-05	0.000707567	no
WBGene00195068	327.134	-1.00506	0.236486	-4.24996	2.13805e-05	0.000384557	no
WBGene00195431	357.369	-0.754068	0.17908	-4.21079	2.54482e-05	0.000444526	no
WBGene00196324	21.5249	-1.58751	0.326067	-4.86865	1.12364e-06	2.90829e-05	no
WBGene00196933	377.685	0.983628	0.228877	4.29763	1.72637e-05	0.000318137	no
WBGene00197080	59.0995	0.967927	0.272229	3.55557	0.000377164	0.00442487	no
WBGene00197545	44.7519	-0.877939	0.295909	-2.96692	0.00300798	0.0233008	no
WBGene00199730	25.3168	1.48198	0.341853	4.33514	1.45669e-05	0.000272909	no
WBGene00200016	60.5042	-1.30053	0.235593	-5.52025	3.38516e-08	1.28213e-06	no
WBGene00200662	190.55	-0.775451	0.270171	-2.87023	0.00410179	0.0299065	no
WBGene00201274	56.8234	1.07404	0.27107	3.96223	7.42532e-05	0.00114029	no
WBGene00201335	59.8388	0.757431	0.242803	3.11953	0.00181138	0.0157767	no
WBGene00201788	57.6414	1.32119	0.268659	4.91772	8.75564e-07	2.36628e-05	no
WBGene00201992	158.637	-0.907074	0.239608	-3.78566	0.0001533	0.00210094	no
WBGene00202108	561.566	0.700497	0.181657	3.85614	0.000115189	0.00166202	no
WBGene00206361	246.892	0.867273	0.182163	4.76097	1.92669e-06	4.63465e-05	no
WBGene00206465	81.733	1.56279	0.234303	6.66996	2.55867e-11	1.79175e-09	no
WBGene00206484	41.5363	1.03661	0.334608	3.09798	0.00194844	0.0167027	no
WBGene00206502	497.605	-1.08815	0.224904	-4.8383	1.30952e-06	3.30855e-05	no
WBGene00219208	512.474	-0.990784	0.17567	-5.64003	1.70023e-08	6.99448e-07	no
WBGene00219216	133.79	-0.730848	0.234358	-3.11852	0.00181765	0.0158226	no
WBGene00219274	63.7942	-1.00495	0.237369	-4.2337	2.29877e-05	0.000408557	no
WBGene00219286	46.8709	1.03014	0.27955	3.685	0.000228706	0.002935	no
WBGene00219287	29.781	-0.8548	0.30044	-2.84516	0.00443896	0.0318635	no
WBGene00219294	63.0719	-0.892371	0.25666	-3.47686	0.000507316	0.00562906	no
WBGene00219375	77.4234	0.824918	0.270441	3.05026	0.00228641	0.0188595	no
WBGene00219410	52.1135	2.63308	0.290572	9.06169	1.28441e-19	2.85029e-17	no
WBGene00219423	92.3627	0.664393	0.237962	2.79201	0.00523815	0.036278	no
WBGene00219711	77.3767	-0.741458	0.213522	-3.47251	0.00051561	0.00569303	no
WBGene00219866	40.1425	-1.07141	0.290645	-3.68634	0.000227504	0.00292616	no
WBGene00219996	257.376	0.923191	0.181008	5.10027	3.39163e-07	1.02373e-05	no
WBGene00220003	67.0674	0.809051	0.25498	3.173	0.00150871	0.0137316	no
WBGene00220010	205.471	-0.810874	0.157073	-5.1624	2.43803e-07	7.59161e-06	no
WBGene00220022	105.881	0.721381	0.244304	2.9528	0.0031491	0.0241095	no
WBGene00220261	432.303	-1.00133	0.208834	-4.79488	1.6277e-06	4.00094e-05	no
WBGene00235110	36.0427	-1.27523	0.345818	-3.68757	0.00022641	0.00291447	no
WBGene00235114	46.1092	0.942921	0.274418	3.43608	0.000590201	0.00639121	no
WBGene00235133	25.4615	1.1198	0.331105	3.38201	0.000719587	0.00753343	no
WBGene00235158	80.815	0.800248	0.221176	3.61815	0.000296721	0.00366677	no
WBGene00235268	862.488	-0.671789	0.212485	-3.16159	0.00156912	0.0141679	yes
WBGene00235332	44.3645	-1.30067	0.282229	-4.60854	4.05504e-06	9.04975e-05	no
WBGene00235383	27.7869	1.0616	0.31997	3.31781	0.000907267	0.00907613	no
WBGene00255549	69.6961	-0.757396	0.275108	-2.75309	0.00590365	0.0396688	no
