# Supplementary material for: Accessible Region Conformation Capture (ARC-C) gives high-resolution insights into genome architecture and regulation
Source: Genome Res. 2022 Feb;32(2):357–66. doi: 10.1101/gr.275669.121 (PMC8805715; doi:10.1101/gr.275669.121)
Supplement: Supplemental Material [file supp_gr.275669.121_Supplemental_TableS7.xlsx]

## Sheet: Analysed factors
Table S7 datasets used
Factor	Source
CFP-1	Chen et al 2014
rex	Crane et al 2015
BLMP-1	this paper
JMJD-2	this paper
SCC-1	this paper
SIN-3	this paper
TOP-2	this paper
CAPG-1	Kranz et al 2013
CAPG-2	Kranz et al 2013
DPY-26	Kranz et al 2013
DPY-27	Kranz et al 2013
DPY-28	Kranz et al 2013
HCP-6	Kranz et al 2013
KLE-2	Kranz et al 2013
MIX-1	Kranz et al 2013
PQN-85	Kranz et al 2013
SMC-4	Kranz et al 2013
DPL-1	Latorre et al 2015
EFL-1	Latorre et al 2015
LIN-9	Latorre et al 2015
LIN-35	Latorre et al 2015
LIN-37	Latorre et al 2015
LIN-52	Latorre et al 2015
LIN-53	Latorre et al 2015
LIN-54	Latorre et al 2015
HPL-2	McMurchy et al 2017
LET-418	McMurchy et al 2017
LIN-13	McMurchy et al 2017
LIN-61	McMurchy et al 2017
MET-2	McMurchy et al 2017
ELT-2	Wiesenfahrt et al 2016
ATF-7	modENCODE, processed peaks from in Janes et al, 2018
ATHP-1	modENCODE, processed peaks from in Janes et al, 2018
B0261.1	modENCODE, processed peaks from in Janes et al, 2018
C34F6.9	modENCODE, processed peaks from in Janes et al, 2018
CEBP-1	modENCODE, processed peaks from in Janes et al, 2018
CEH-18	modENCODE, processed peaks from in Janes et al, 2018
CEH-31	modENCODE, processed peaks from in Janes et al, 2018
CEH-34	modENCODE, processed peaks from in Janes et al, 2018
CEH-36	modENCODE, processed peaks from in Janes et al, 2018
CEH-38	modENCODE, processed peaks from in Janes et al, 2018
CEH-48	modENCODE, processed peaks from in Janes et al, 2018
CES-1	modENCODE, processed peaks from in Janes et al, 2018
CRH-2	modENCODE, processed peaks from in Janes et al, 2018
DAF-16	modENCODE, processed peaks from in Janes et al, 2018
DSC-1	modENCODE, processed peaks from in Janes et al, 2018
DVE-1	modENCODE, processed peaks from in Janes et al, 2018
EGL-5	modENCODE, processed peaks from in Janes et al, 2018
EGL-13	modENCODE, processed peaks from in Janes et al, 2018
ELT-1	modENCODE, processed peaks from in Janes et al, 2018
ELT-3	modENCODE, processed peaks from in Janes et al, 2018
EOR-1	modENCODE, processed peaks from in Janes et al, 2018
EPC-1	modENCODE, processed peaks from in Janes et al, 2018
F13H6.1	modENCODE, processed peaks from in Janes et al, 2018
F49E8.2	modENCODE, processed peaks from in Janes et al, 2018
FKH-8	modENCODE, processed peaks from in Janes et al, 2018
FKH-10	modENCODE, processed peaks from in Janes et al, 2018
FOS-1	modENCODE, processed peaks from in Janes et al, 2018
HDA-1	modENCODE, processed peaks from in Janes et al, 2018
HIF-1	modENCODE, processed peaks from in Janes et al, 2018
HIM-1	modENCODE, processed peaks from in Janes et al, 2018
HLH-1	modENCODE, processed peaks from in Janes et al, 2018
HLH-4	modENCODE, processed peaks from in Janes et al, 2018
HLH-30	modENCODE, processed peaks from in Janes et al, 2018
HMG-11	modENCODE, processed peaks from in Janes et al, 2018
JUN-1	modENCODE, processed peaks from in Janes et al, 2018
LSY-2	modENCODE, processed peaks from in Janes et al, 2018
MDL-1	modENCODE, processed peaks from in Janes et al, 2018
MLS-2	modENCODE, processed peaks from in Janes et al, 2018
NFYA-1	modENCODE, processed peaks from in Janes et al, 2018
NHR-20	modENCODE, processed peaks from in Janes et al, 2018
NHR-21	modENCODE, processed peaks from in Janes et al, 2018
NHR-23	modENCODE, processed peaks from in Janes et al, 2018
NHR-25	modENCODE, processed peaks from in Janes et al, 2018
NHR-47	modENCODE, processed peaks from in Janes et al, 2018
NHR-48	modENCODE, processed peaks from in Janes et al, 2018
NHR-71	modENCODE, processed peaks from in Janes et al, 2018
NHR-80	modENCODE, processed peaks from in Janes et al, 2018
NHR-85	modENCODE, processed peaks from in Janes et al, 2018
NHR-90	modENCODE, processed peaks from in Janes et al, 2018
NURF-1	modENCODE, processed peaks from in Janes et al, 2018
PHA-4	modENCODE, processed peaks from in Janes et al, 2018
PQM-1	modENCODE, processed peaks from in Janes et al, 2018
REF-2	modENCODE, processed peaks from in Janes et al, 2018
REPO-1	modENCODE, processed peaks from in Janes et al, 2018
RNT-1	modENCODE, processed peaks from in Janes et al, 2018
RPC-1	modENCODE, processed peaks from in Janes et al, 2018
SMA-3	modENCODE, processed peaks from in Janes et al, 2018
SMA-9	modENCODE, processed peaks from in Janes et al, 2018
SNPC-1.1	modENCODE, processed peaks from in Janes et al, 2018
SNPC-3.4	modENCODE, processed peaks from in Janes et al, 2018
SNPC-4	modENCODE, processed peaks from in Janes et al, 2018
SNU-23	modENCODE, processed peaks from in Janes et al, 2018
SPTF-1	modENCODE, processed peaks from in Janes et al, 2018
SWSN-7	modENCODE, processed peaks from in Janes et al, 2018
TBX-2	modENCODE, processed peaks from in Janes et al, 2018
UNC-42	modENCODE, processed peaks from in Janes et al, 2018
UNC-55	modENCODE, processed peaks from in Janes et al, 2018
UNC-86	modENCODE, processed peaks from in Janes et al, 2018
UNC-130	modENCODE, processed peaks from in Janes et al, 2018
XND-1	modENCODE, processed peaks from in Janes et al, 2018
ZFP-1	modENCODE, processed peaks from in Janes et al, 2018
ZIP-8	modENCODE, processed peaks from in Janes et al, 2018
ZTF-18	modENCODE, processed peaks from in Janes et al, 2018
