# Supplementary material for: Accessible Region Conformation Capture (ARC-C) gives high-resolution insights into genome architecture and regulation
Source: HighWire-hosted journal article supplement (doi:10.1101/gr.275669.121), 2021-12-21
Supplement: SupplementalFigures_JDedit.pdf [file SupplementalFigures_JDedit.pdf]

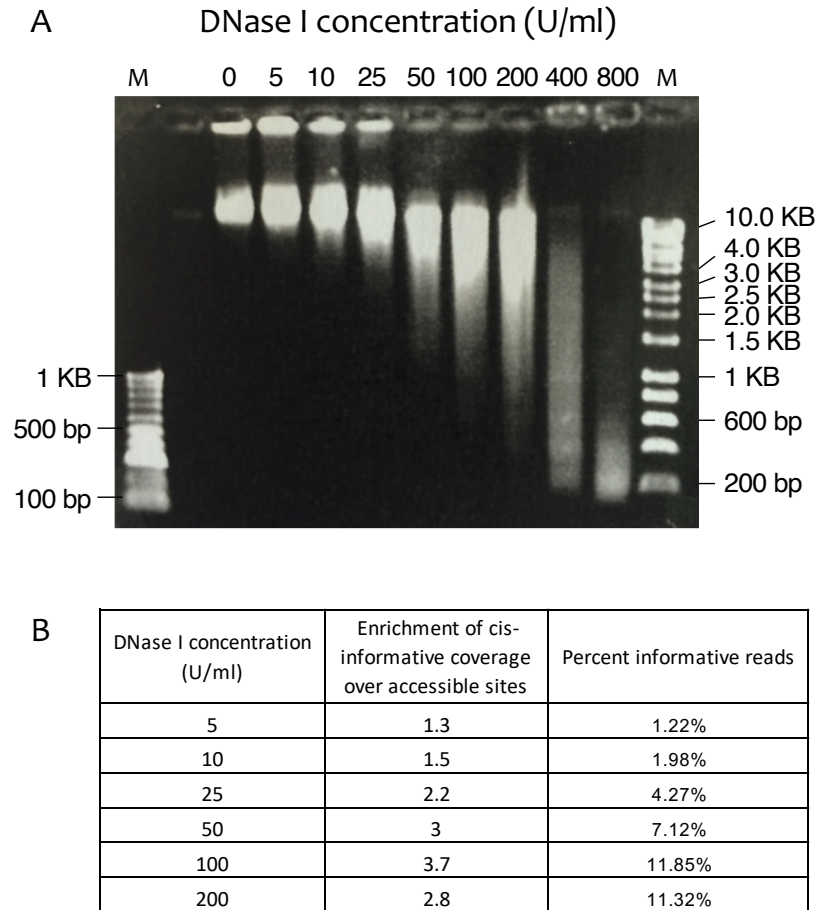

**Supplemental Fig. S1** Empirical determination of DNase I concentration for optimal recovery of interactions between accessible chromatin sites.

(A) Genomic DNA digestion patterns resulting from different concentrations of DNase I. (B) Enrichment of cis-informative reads at accessible sites relative to background and percent informative reads for ARC-C libraries prepared after digesting with different concentrations of DNase I. Accessible sites are from (Janes et al. 2018).

## A Sequencing statistics

|                   | N2-rep1   | N2-rep2a  | N2-rep2b  | N2-rep3   | <i>blmp-1</i> -rep1 | <i>blmp-1</i> -rep2 | <i>met-2 set-25</i> -rep1 | <i>met-2 set-25</i> -rep2 |
|-------------------|-----------|-----------|-----------|-----------|---------------------|---------------------|---------------------------|---------------------------|
| Total reads       | 395166552 | 261529124 | 263781134 | 227273986 | 171056366           | 92794660            | 199043186                 | 318798182                 |
| mapped            | 339865256 | 226265095 | 241537115 | 218276630 | 90439059            | 36837378            | 164782322                 | 236147255                 |
| paired mapq30     | 245647846 | 159352418 | 180531150 | 151284678 | 54101084            | 25695040            | 101590260                 | 125117274                 |
| valid reads       | 109874032 | 88975324  | 134004104 | 80576176  | 35616242            | 23229198            | 69153378                  | 78544870                  |
| informative reads | 9271402   | 7350866   | 8047186   | 6068794   | 3973496             | 2434804             | 5653462                   | 6206544                   |
| cis-informative   | 7212418   | 5731300   | 6262410   | 4760748   | 2668008             | 1600316             | 4476458                   | 4594104                   |
| cis-ratio         | 0.7779    | 0.7797    | 0.7782    | 0.7845    | 0.6715              | 0.6573              | 0.7918                    | 0.7402                    |

## B Genome Disco reproducibility at 20kb resolution

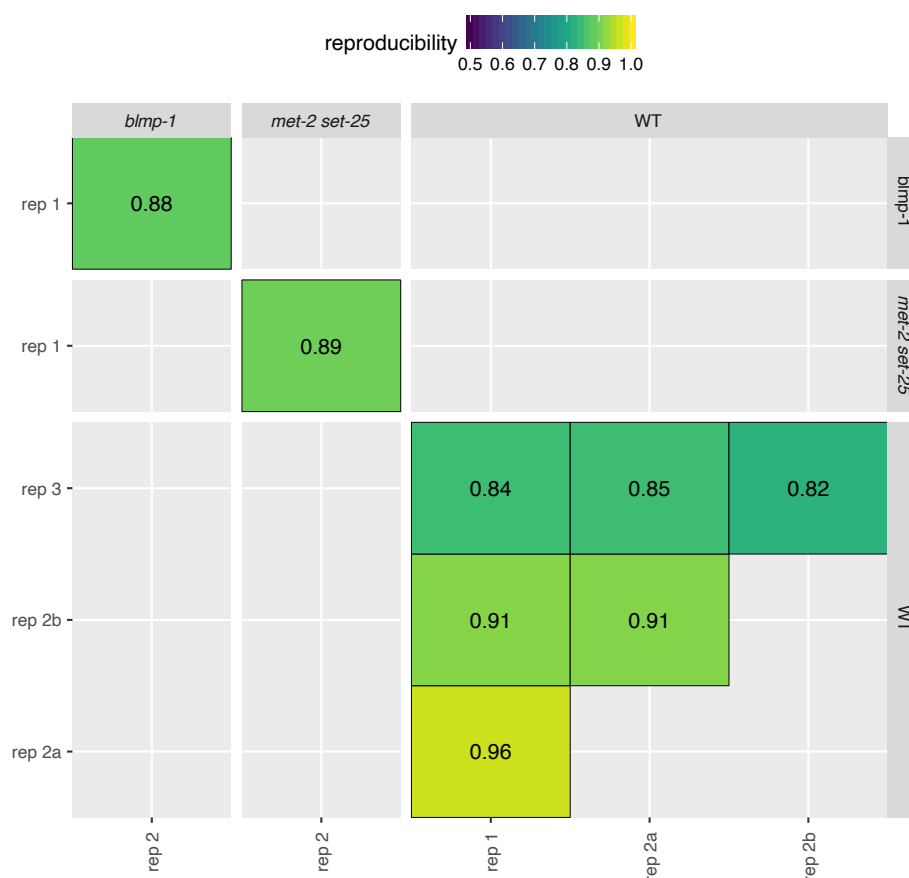

### Supplemental Fig. S2 Sequencing statistics and replicate correlations.

(A) Sequencing statistics of reads for each replicate. (B) GenomeDicso (Ursu et al. 2018) reproducibility between replicates using 20 kb binned data.

| Library                                             | Reference         | Unique reads | Deduplicated reads | Informative reads | % Informative reads (relative to uniquely mapped reads) | % Informative reads (relative to deduplicated reads) |
|-----------------------------------------------------|-------------------|--------------|--------------------|-------------------|---------------------------------------------------------|------------------------------------------------------|
| ARC-C <i>C. elegans</i> WT                          | this paper        | 736,816,092  | 413,429,636        | 30,738,248        | 4.17                                                    | 7.43                                                 |
| ARC-C <i>blmp-1</i>                                 | this paper        | 79,796,124   | 58,845,440         | 6,408,300         | 8.03                                                    | 10.89                                                |
| ARC-C <i>met-2 set-25</i>                           | this paper        | 226,707,534  | 147,698,248        | 11,860,006        | 5.23                                                    | 8.03                                                 |
| <b>Studies that assayed regulatory interactions</b> |                   |              |                    |                   |                                                         |                                                      |
| Targeted DNase Hi-C H1 (pe)                         | Ma et al 2015     | 66,661,520   | 56,158,312         | 1,081,064         | 1.62                                                    | 1.93                                                 |
| Targeted DNase Hi-C K562 (pe)                       | Ma et al 2015     | 79,970,100   | 47,904,586         | 1,411,592         | 1.77                                                    | 2.95                                                 |
| Capture Hi-C CD34                                   | Mifsud et al 2015 | 138,217,259  | 48,087,767         | 12,685,127        | 9.18                                                    | 26.38                                                |
| Capture Hi-C GM12878                                | Mifsud et al 2015 | 135,546,709  | 54,397,117         | 10,532,346        | 7.77                                                    | 19.36                                                |
| Capture-C mESC                                      | Hughes et al 2014 | 127,817,852  | 69,226,329         | 259,350           | 0.20                                                    | 0.37                                                 |
| Capture-C Ter119+ rep 1                             | Hughes et al 2014 | 70,108,284   | 33,388,250         | 376,730           | 0.54                                                    | 1.13                                                 |
| Capture-C Ter119+ rep 2                             | Hughes et al 2014 | 262,887,176  | 97,528,819         | 419,695           | 0.16                                                    | 0.43                                                 |
| <b><i>C. elegans</i> Hi-C studies</b>               |                   |              |                    |                   |                                                         |                                                      |
| Hi-C <i>C. elegans</i> WT                           | Brejic et al 2017 | 647,306,152  | 563,816,513        | 265,931,063       | 41.08                                                   | 47.17                                                |
| Hi-C <i>C. elegans</i> WT                           | Crane et al 2015  | 333,826,368  | 247,125,231        | 137,443,864       | 41.17                                                   | 55.62                                                |

### Supplemental Fig. S3 Comparison of the efficiency of ARC-C to other chromatin interaction methods

Efficiencies of ARC-C (top), methods that map regulatory interactions (middle) and *C. elegans* Hi-C studies (bottom). Informative reads are those used for downstream analyses in the individual studies, following authors' filtering for potential artefacts.

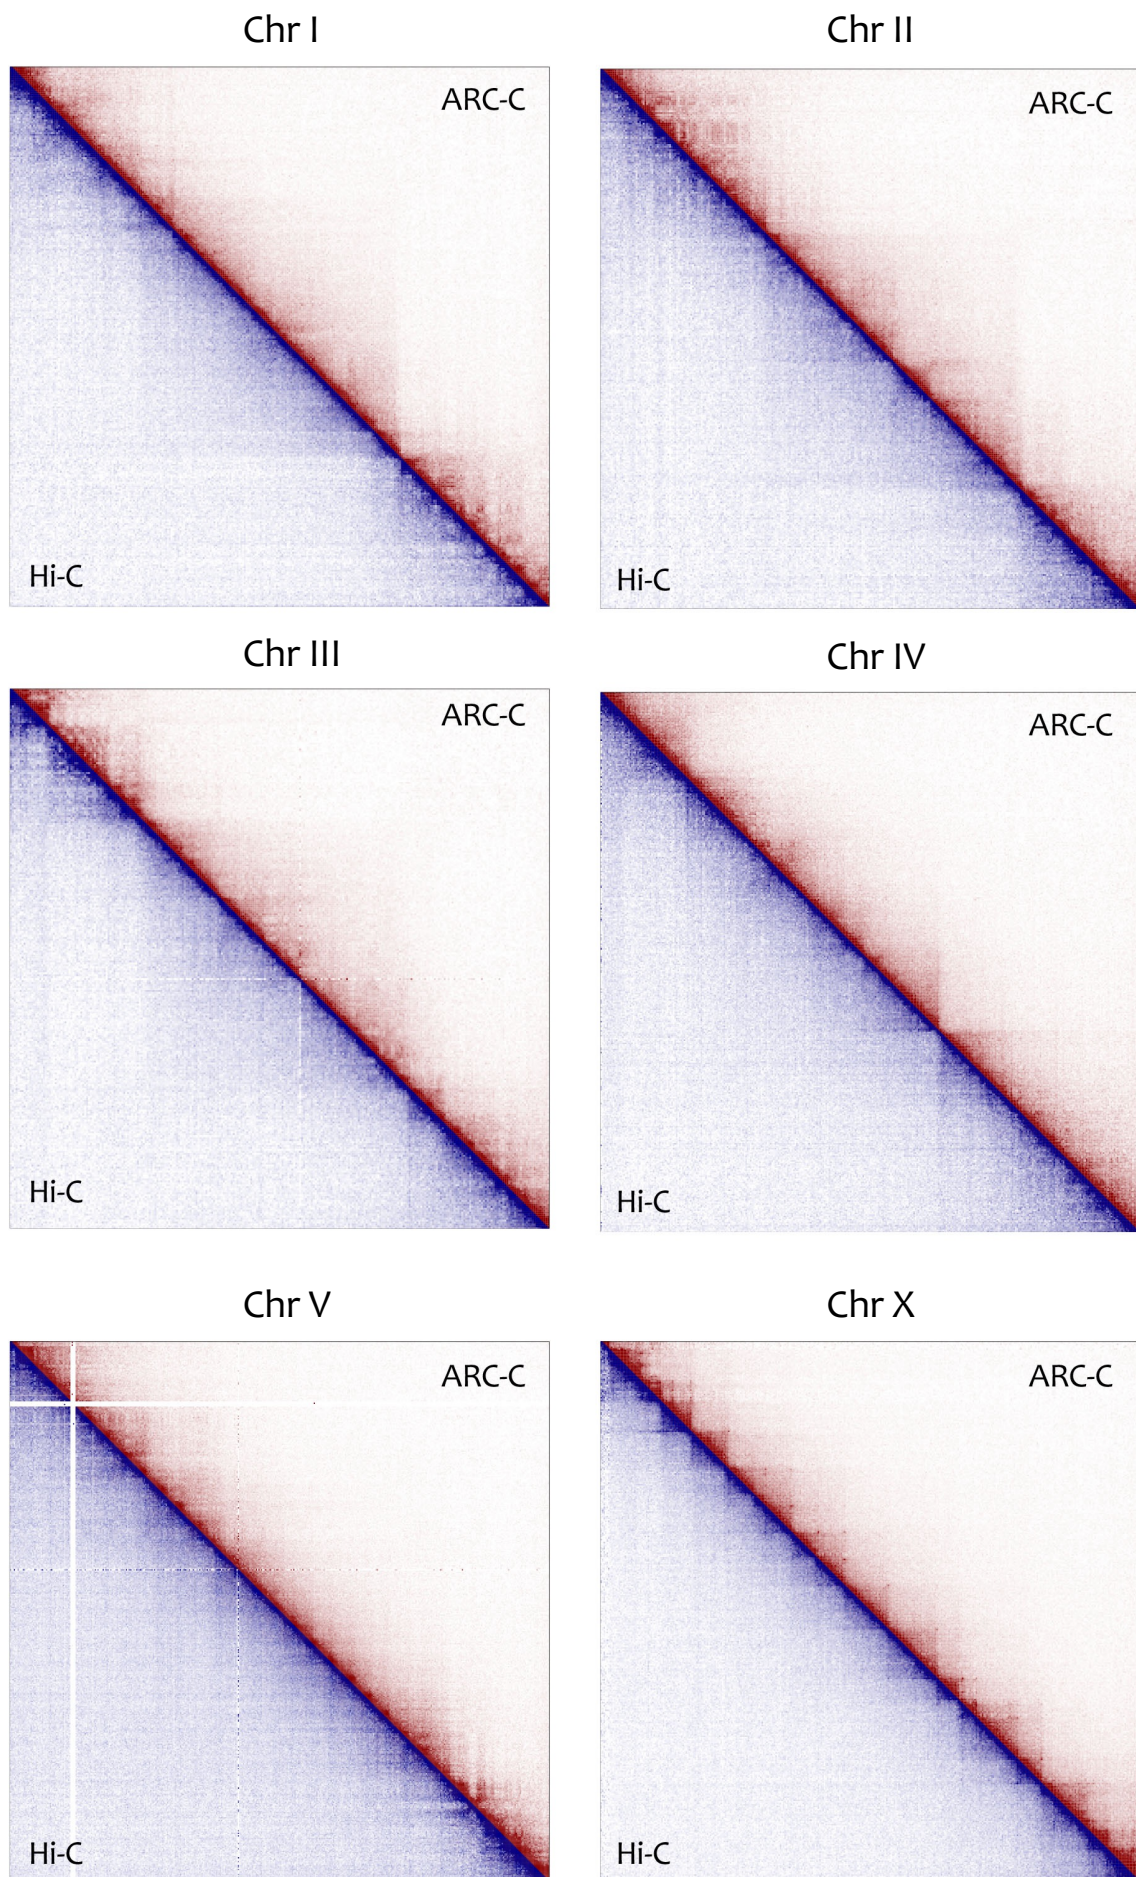

**Supplemental Fig. S4** Comparison of ARC-C and Hi-C contact maps for each of the six *C. elegans* chromosomes at 50 kb resolution. Hi-C data are from Crane et al. 2015.



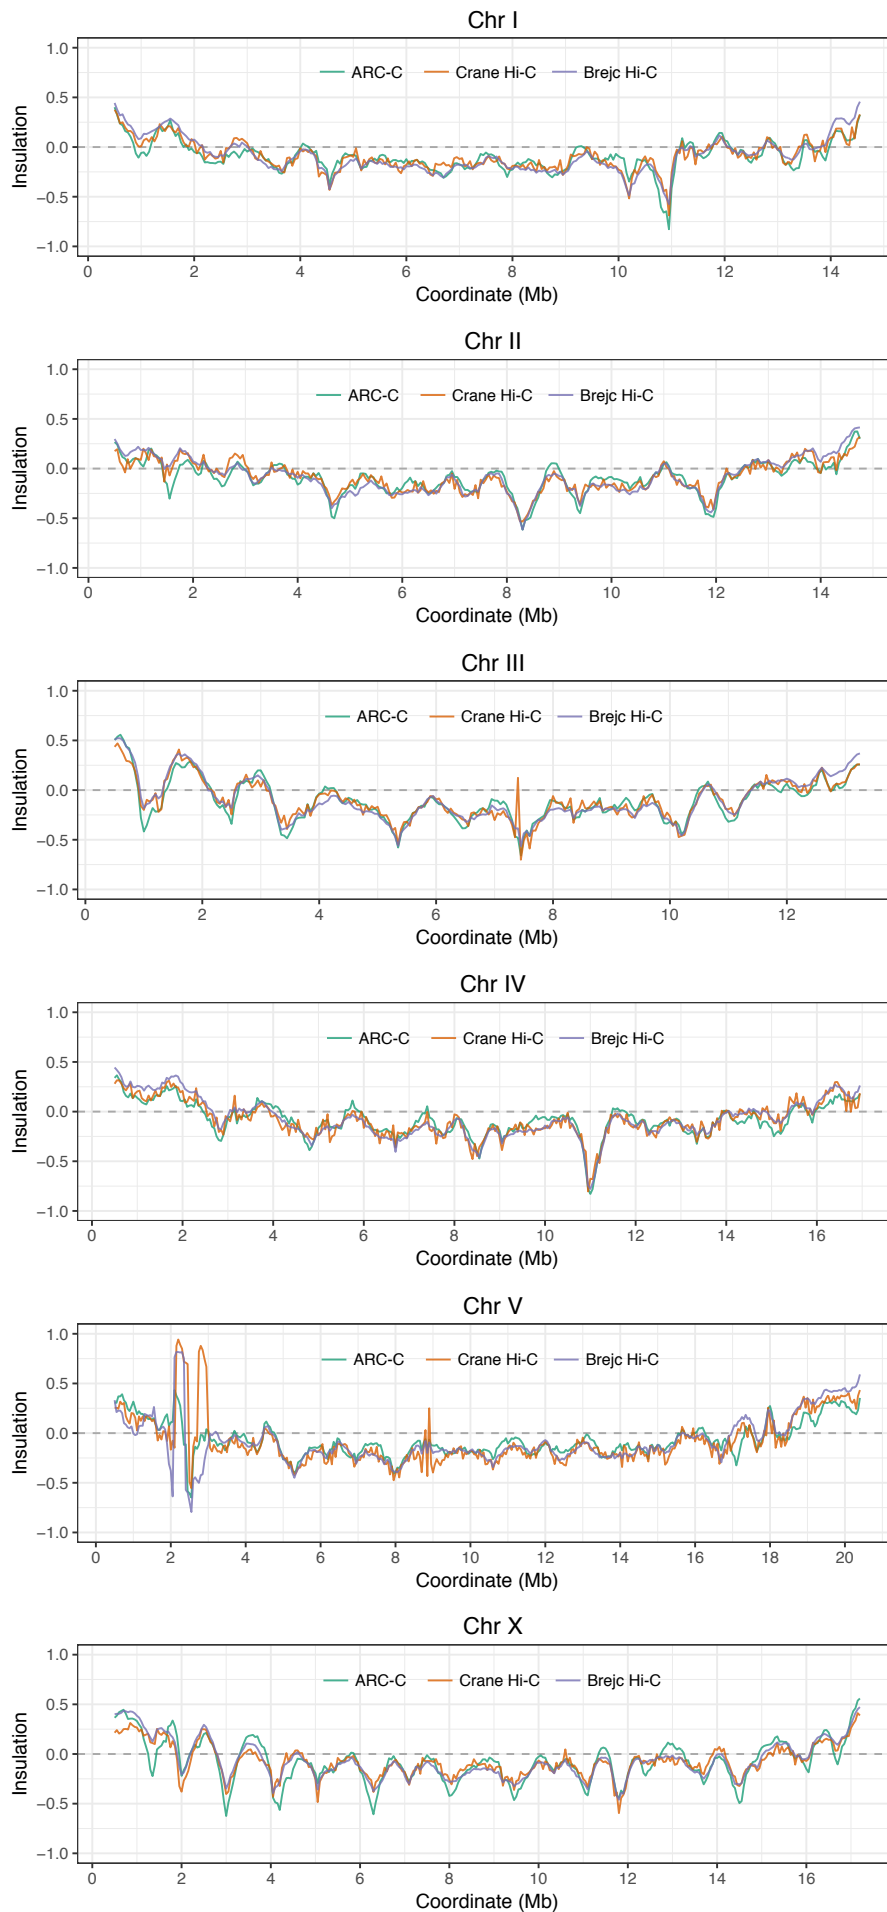

**Supplemental Fig. S5** Comparison of whole chromosome insulation plots derived from ARC-C or Hi-C data

Comparison of insulation scores between ARC-C (this study) and two Hi-C maps (Crane et al. 2015; Brejc et al. 2017) calculated with a 500kb sliding block as in Crane et al. 2015.

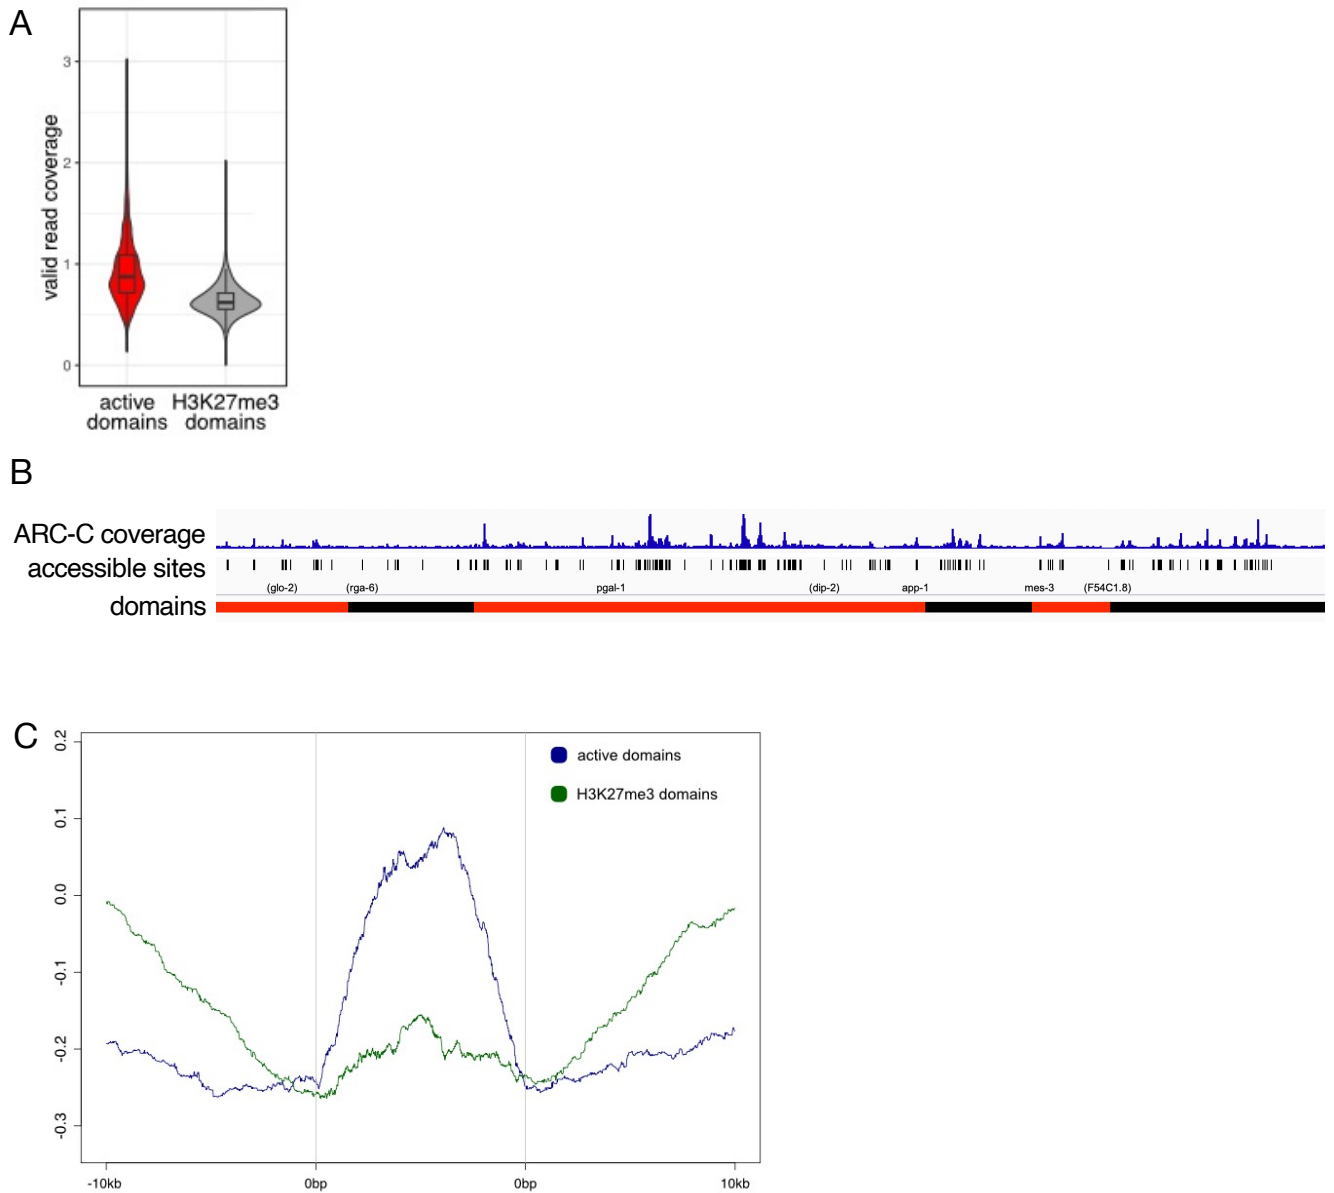

**Supplemental Fig. S6** ARC-C coverage across active and H3K27me3 domains

(A) Violin plots showing distribution of valid coverage signal across active and H3K27me3 domains. (B) IGV screen shot of valid reads across a region of Chr IV. Accessible sites are from (Janes et al. 2018). (C) Median insulation scores at 1kb resolution with a 10kb sliding block calculated as in Crane et al. 2015 were plotted across aggregated pseudoscaled active or H3K27me3 domains and the associated 10kb upstream and downstream genomic regions.

## A ARC-C data from Fig. 2

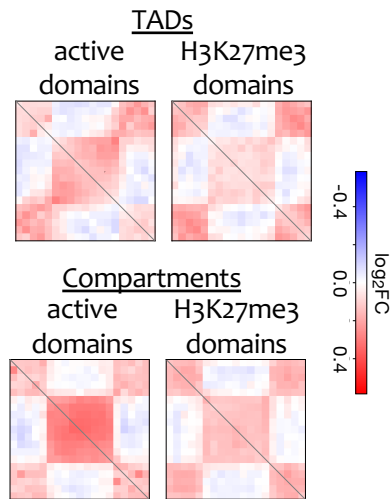

## B Hi-C data from Crane et al 2015

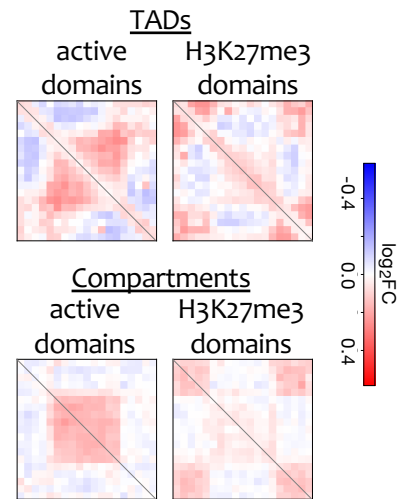

## C Compartment strength by H3K9 methylation

| All domains |                       |            |                                        |            |
|-------------|-----------------------|------------|----------------------------------------|------------|
| Domain type | Fold enrichment in wt | p-value    | Fold enrichment in <i>met-2 set-25</i> | p-value    |
| active      | 1.23                  | 2.786E-195 | 1.23                                   | 2.8825E-90 |
| regulated   | 1.10                  | 1.253E-45  | 1.01                                   | 0.36080188 |

  

| Domains separated by H3K9me3 marking |                       |            |                                        |            |                       |            |                                        |            |
|--------------------------------------|-----------------------|------------|----------------------------------------|------------|-----------------------|------------|----------------------------------------|------------|
| Domain type                          | H3K9me3 +             |            |                                        |            | H3K9me3 -             |            |                                        |            |
|                                      | Fold enrichment in wt | p-value    | Fold enrichment in <i>met-2 set-25</i> | p-value    | Fold enrichment in wt | p-value    | Fold enrichment in <i>met-2 set-25</i> | p-value    |
| active                               | 1.24                  | 1.6615E-14 | 1.24                                   | 5.0665E-08 | 1.22                  | 2.639E-164 | 1.22                                   | 7.1357E-75 |
| H3K27me3                             | 1.12                  | 9.5572E-19 | 1.03                                   | 0.16230676 | 1.10                  | 3.4635E-27 | 1.01                                   | 0.56483504 |

  

| Domains separated by H3K9me2 marking |                       |            |                                        |            |                       |            |                                        |            |
|--------------------------------------|-----------------------|------------|----------------------------------------|------------|-----------------------|------------|----------------------------------------|------------|
| Domain type                          | H3K9me2 +             |            |                                        |            | H3K9me2 -             |            |                                        |            |
|                                      | Fold enrichment in wt | p-value    | Fold enrichment in <i>met-2 set-25</i> | p-value    | Fold enrichment in wt | p-value    | Fold enrichment in <i>met-2 set-25</i> | p-value    |
| active                               | 1.15                  | 4.2646E-23 | 1.17                                   | 5.9601E-13 | 1.23                  | 1.187E-149 | 1.23                                   | 7.5875E-68 |
| H3K27me3                             | 1.12                  | 6.7409E-11 | 1.03                                   | 0.36247315 | 1.09                  | 9.4308E-28 | 1.01                                   | 0.58908199 |

  

| Domains separated by H3K9me1 marking |                       |            |                                        |            |                       |            |                                        |            |
|--------------------------------------|-----------------------|------------|----------------------------------------|------------|-----------------------|------------|----------------------------------------|------------|
| Domain type                          | H3K9me1 +             |            |                                        |            | H3K9me1 -             |            |                                        |            |
|                                      | Fold enrichment in wt | p-value    | Fold enrichment in <i>met-2 set-25</i> | p-value    | Fold enrichment in wt | p-value    | Fold enrichment in <i>met-2 set-25</i> | p-value    |
| active                               | 1.20                  | 1.1858E-54 | 1.22                                   | 9.2205E-29 | 1.21                  | 2.7876E-95 | 1.20                                   | 2.1015E-41 |
| H3K27me3                             | 1.08                  | 0.00606599 | 1.03                                   | 0.6075745  | 1.10                  | 2.0856E-36 | 1.02                                   | 0.20855563 |

## Supplemental Fig. S7 TAD and compartment analyses using ARC-C and Hi-C data, and ARC-C analyses in active and h3K27me3 domains separated by H3K9me marking

(A) ARC-C plots reproduced from Fig 2. Top: TAD enrichment is 1.12 fold for active domains and 1.06 fold for H3K27me3 domains. Bottom: compartment enrichment is 1.23 fold for active domains and 1.10 fold for H3K27me3 domains. (B) Plots are as in (a) but using Hi-C data from Crane et al. 2015. Top: TAD enrichment is 1.1 fold for active domains and 1.04 fold for H3K27me3 domains. Bottom: compartment enrichment is 1.11-fold for active domains and 1.03 for H3K27me3 domains. (C) Enrichment for compartment interactions in active and H3K27me3 domains in wild-type and *met-2 set-25* mutants separated by H3K9 methylation marking; p-values give the significance of the enrichment relative to background. Red values indicate conditions for which there is no significant enrichment for compartment interactions. See Fig 2 and methods for details.

## Supplemental Figure S8

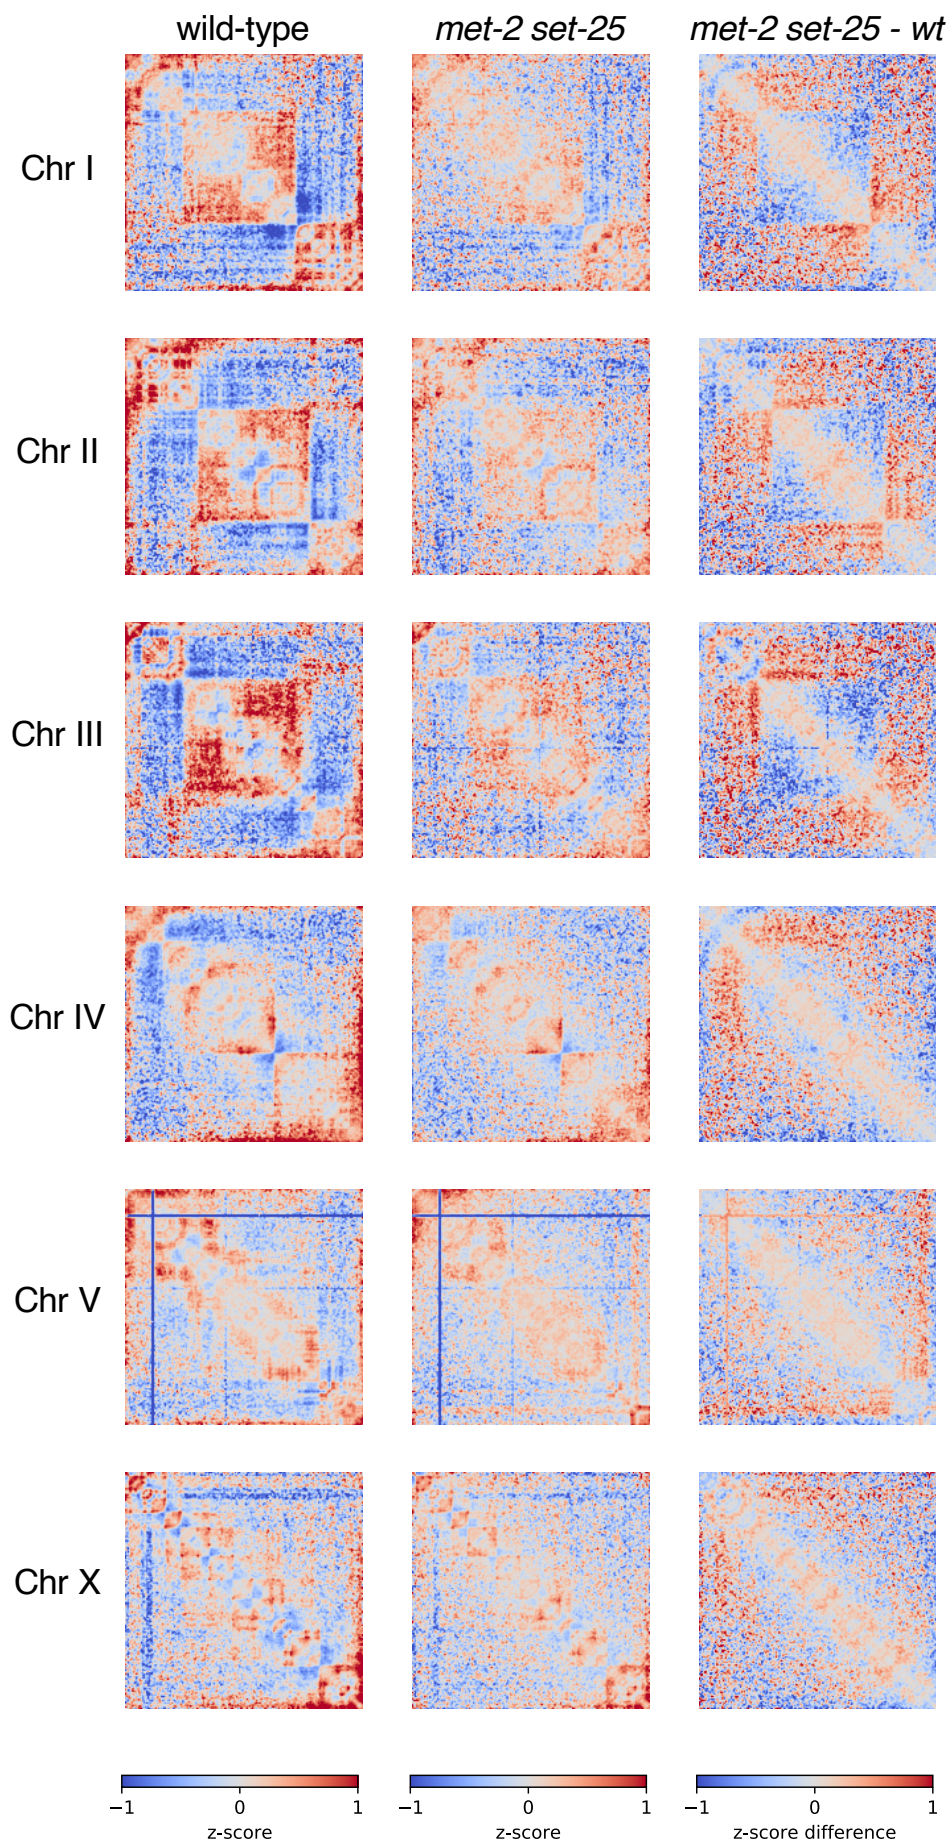

**Supplemental Fig. S8** Comparison of ARC-C contact maps in wild-type and *met-2 set-25* mutants

(left, middle) Whole chromosome z-score heatmap shows higher (red) or lower (blue) than expected contact frequency in wild-type (left) and *met-2 set-25* mutants (middle). (right) Whole chromosome z-score subtraction heatmap shows increased (red) or decreased (blue) contact frequency in *met-2 set-25* compared to wild-type.



Supplemental Figure S9

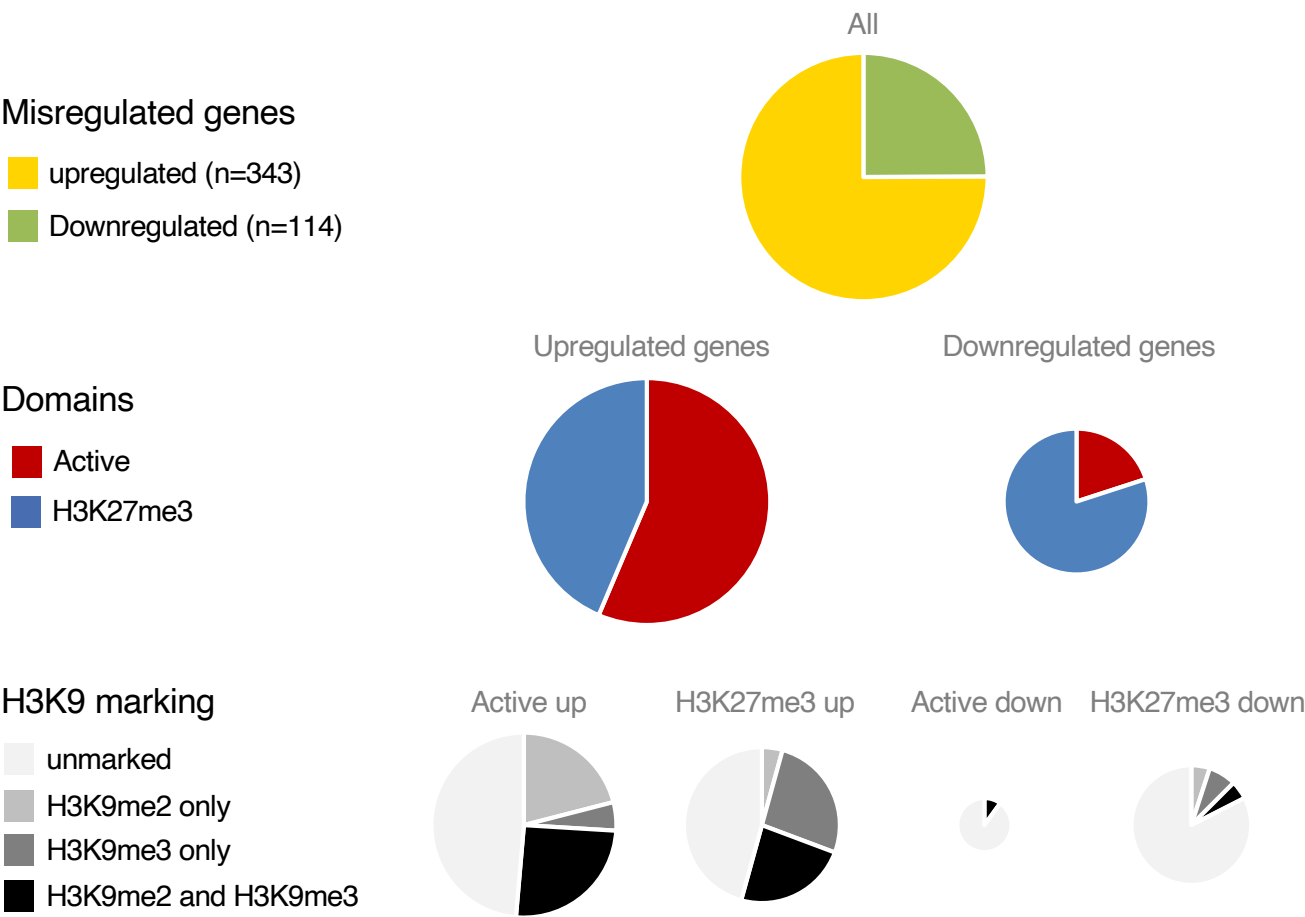

**Supplemental Fig. S9** Relationship between gene expression changes in *met-2 set-25* mutants, domain type, and H3K9 methylation

Supplemental Figure S10

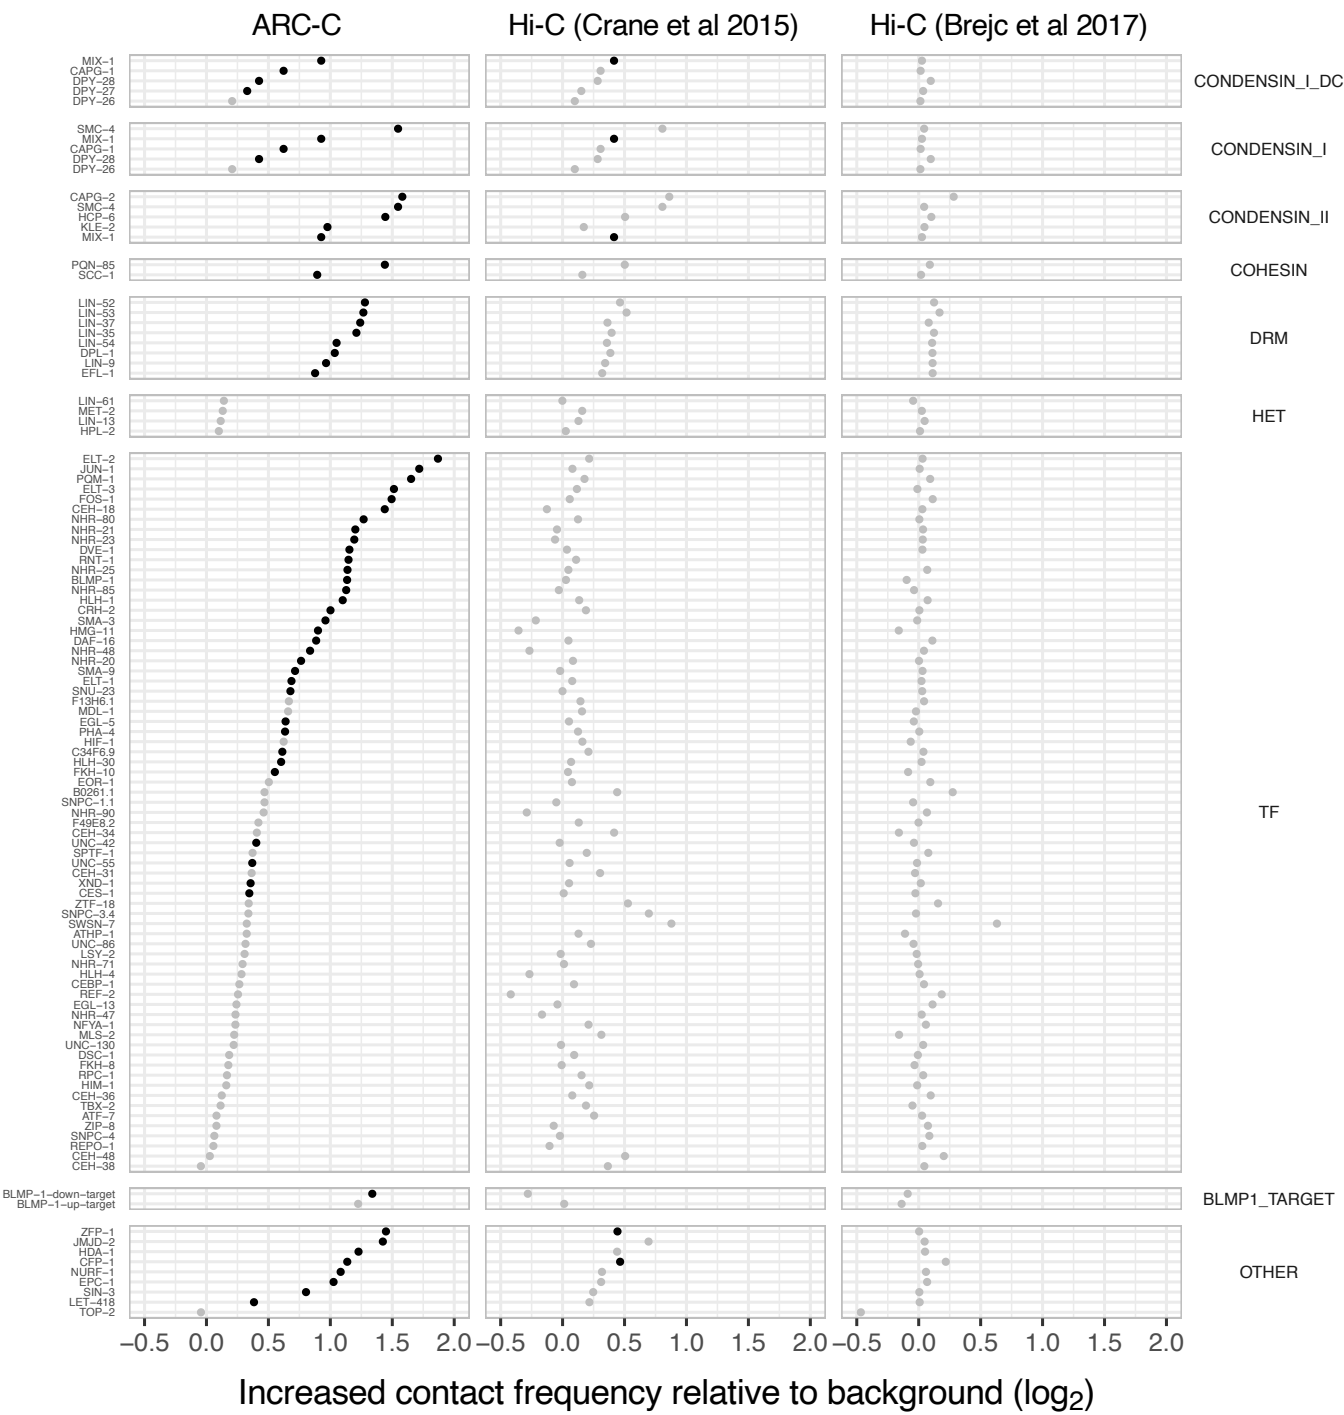

**Supplemental Fig. S10** Comparison of contact frequency between binding sites of indicated proteins in ARC-C and Hi-C maps. Black circles indicate significant enrichment. Hi-C data are from Crane et al. 2015 and Brejc et al 2017. See Methods for details.

## Supplemental Figure S11

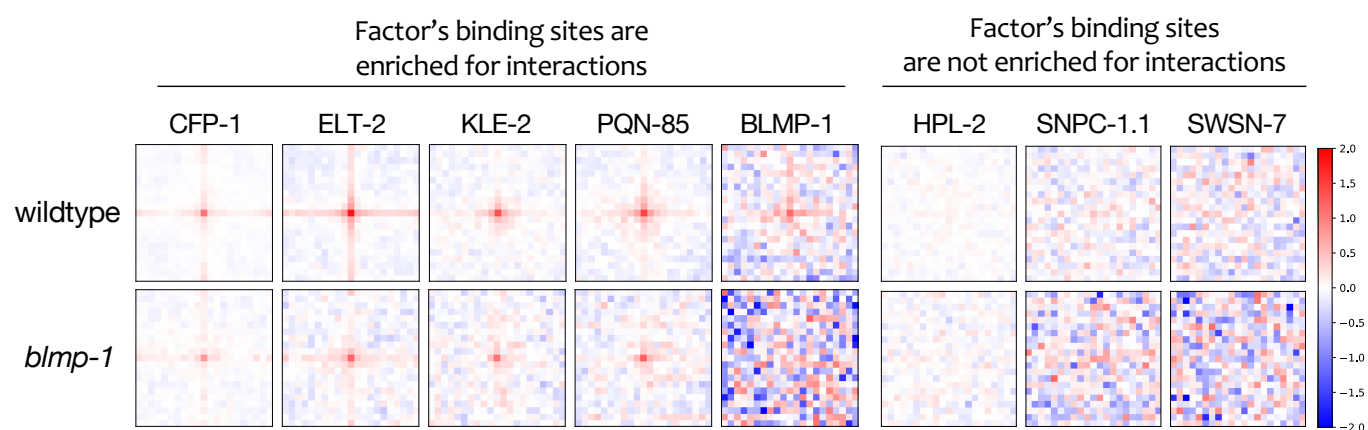

**Supplemental Fig. S11** Aggregate contact analyses of transcription and chromatin factor binding regions

Representative aggregate contact analysis (APA) plots of data in Supplemental Fig. S8 showing ARC-C signal between binding sites of indicated factors at 1kb resolution and a distance range of 20kb-1Mb.

## Supplemental Figure S12

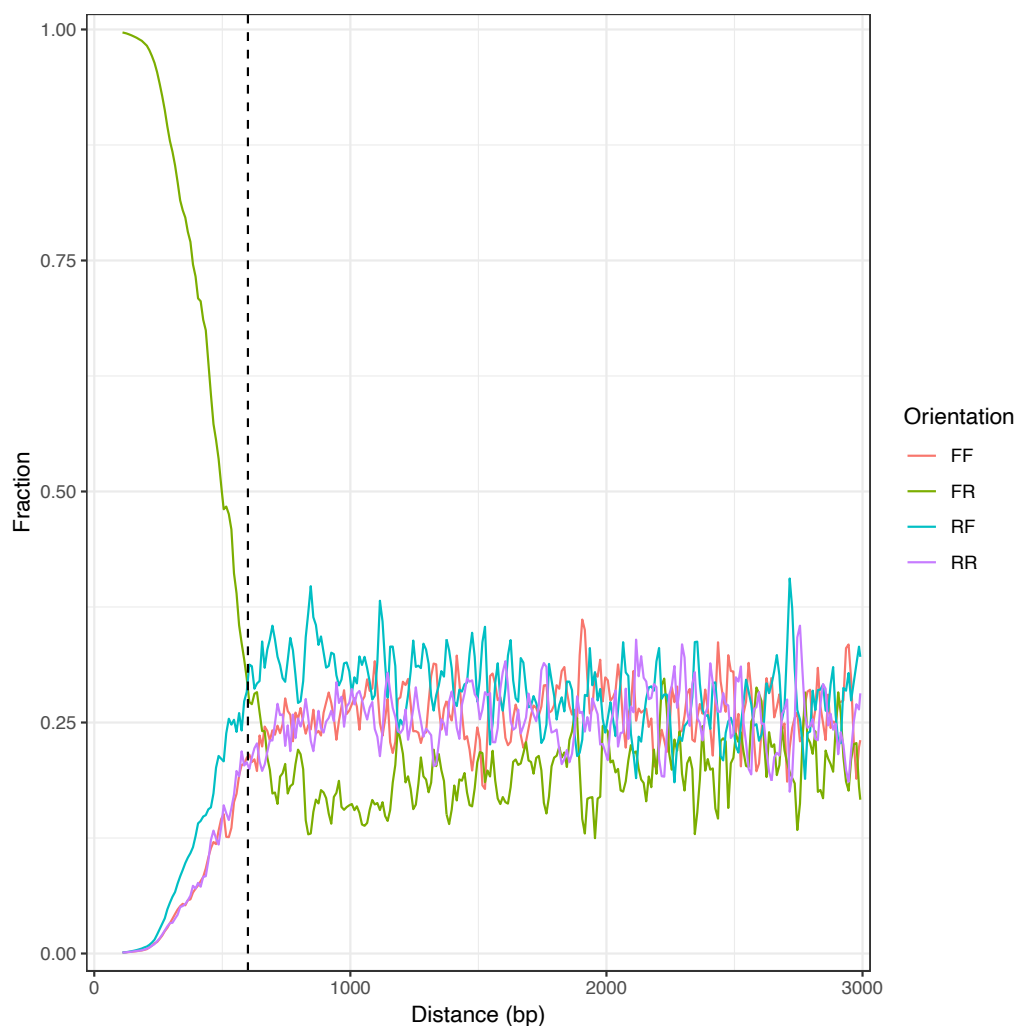

**Supplemental Fig. S12** Fraction of read pair orientation as a function of mapping distance.

FF, both reads map in forward orientation; FR, read 1 maps in forward orientation and read 2 maps in reverse orientation; RF, read 1 maps in reverse orientation and read 2 maps in forward orientation; RR, both reads map in reverse orientation. Only read pairs where read1 mapped to a smaller coordinate than read2 are plotted. Reads are from the wild-type ARC-C map. Dashed vertical line marks 600bp.



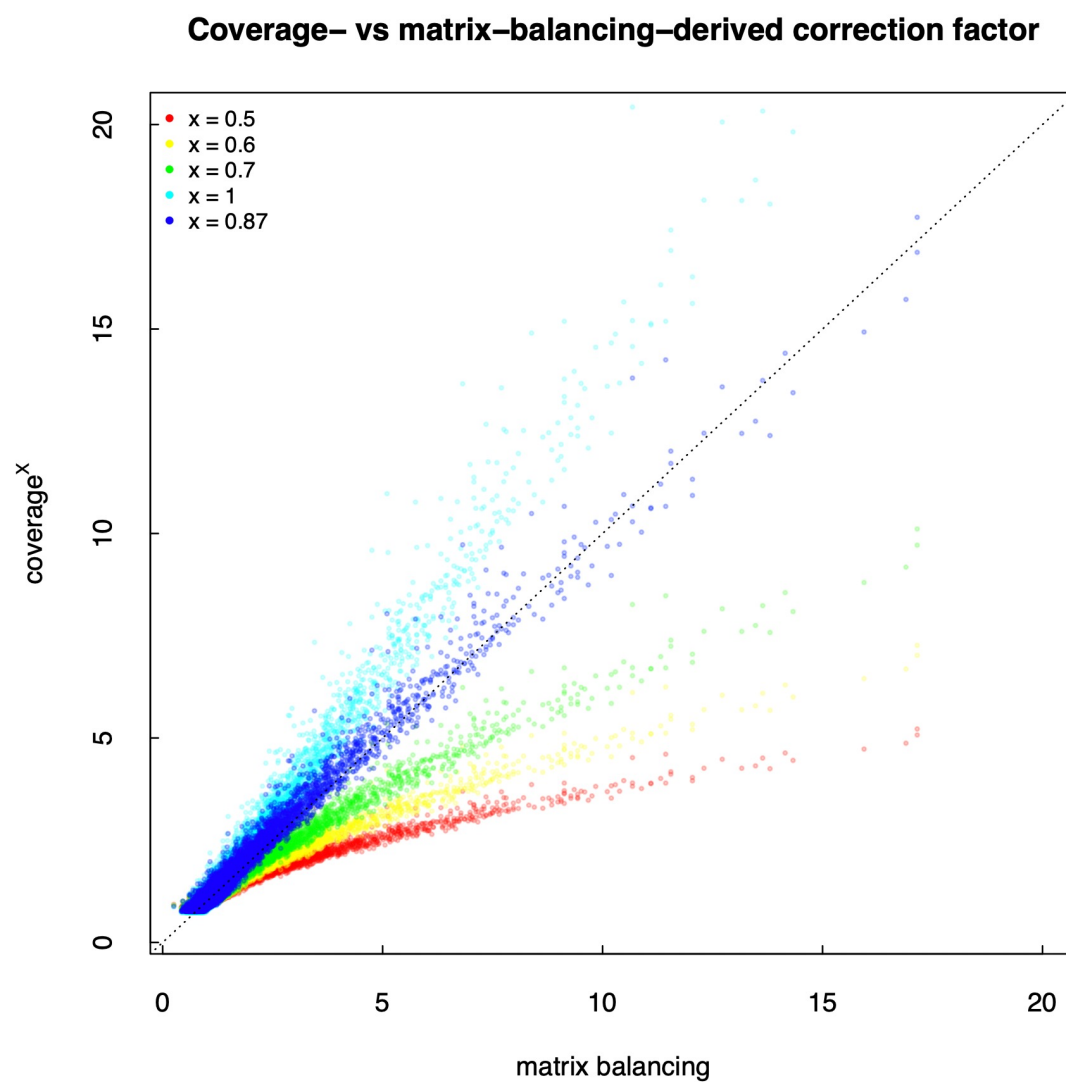

**Supplemental Fig. S13** Comparing matrix-balancing-derived correction factors and reciprocal of different exponents of bin coverage

In the plot, the x axis gives matrix-balancing derived correction factors (normalised so that the median is 1), whereas y axis gives the reciprocal of different exponents of bin coverage (normalised so that the median is 1).
